# Supplementary material for: Genotyping-by-Sequencing Facilitates a High-Density Consensus Linkage Map forAegilops umbellulata, a Wild Relative of Cultivated Wheat
Source: Oxford University Press journal article supplement (doi:10.1534/g3.117.039966), 2017-04-01

3U

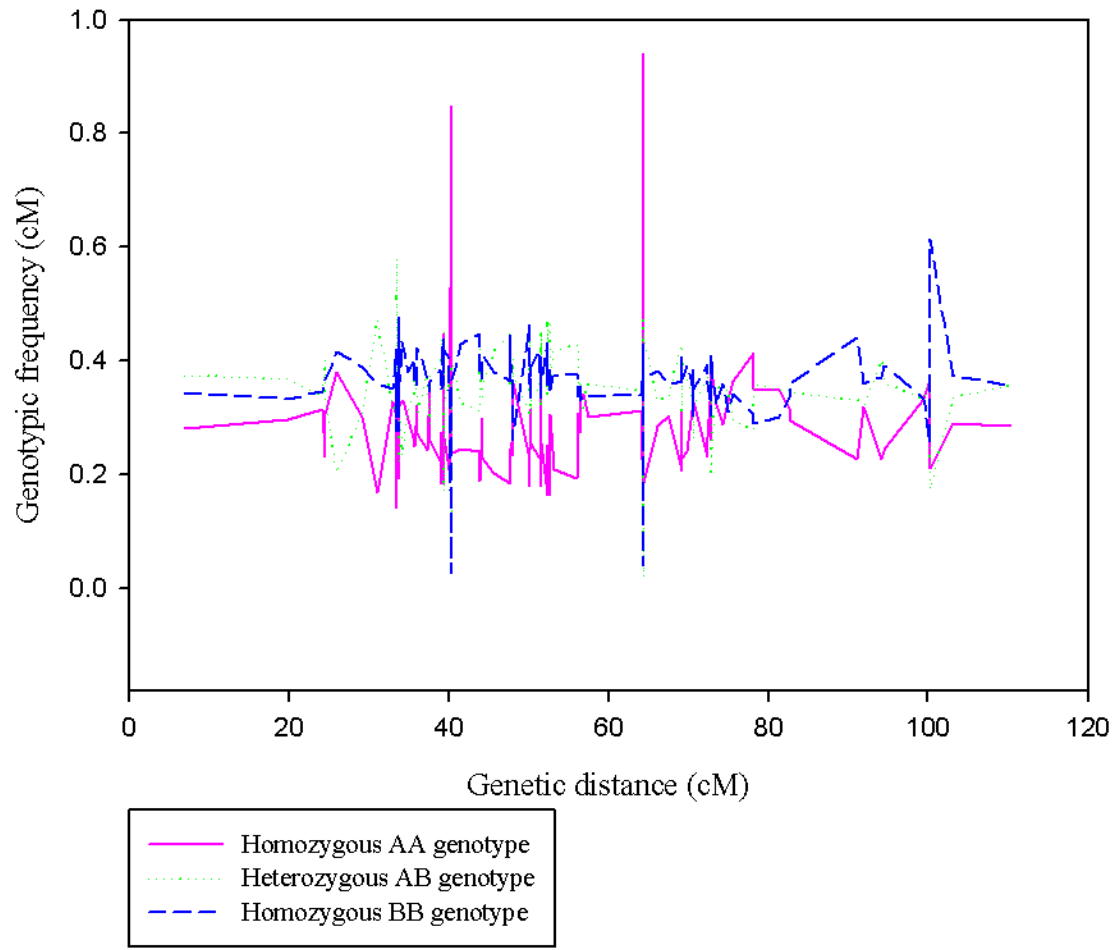

Supplement: 039966_figures8.pdf [file 039966_figures8.pdf]
