# Supplementary material for: Genotyping-by-Sequencing Facilitates a High-Density Consensus Linkage Map for Aegilops umbellulata, a Wild Relative of Cultivated Wheat
Source: G3 (Bethesda). 2017 Mar 29;7(5):1551–61. doi: 10.1534/g3.117.039966 (PMC5427507; doi:10.1534/g3.117.039966)
Supplement: Supplementary file 14 [file 1551TableS1.xlsx]

## Sheet: Aeupop1_MSTMap
Linkage maps uing MSTMap
Markers	Chr	cM
TP9663	1U	0
TP27181	1U	2.953
TP31757	1U	2.953
TP37062	1U	3.673
TP25789	1U	4.752
TP12036	1U	5.831
TP3802	1U	6.911
TP42419	1U	9.503
TP36611	1U	9.863
TP8670	1U	10.222
TP1133	1U	11.014
TP36346	1U	11.373
TP20527	1U	11.733
TP34677	1U	11.733
TP32293	1U	13.965
TP26942	1U	14.684
TP19452	1U	15.404
TP5375	1U	17.78
TP45301	1U	18.931
TP14616	1U	18.931
TP28577	1U	18.931
TP39908	1U	18.931
TP43513	1U	18.931
TP31732	1U	19.291
TP30453	1U	20.968
TP15762	1U	22.639
TP40295	1U	24.66
TP1876	1U	25.38
TP3752	1U	25.739
TP3778	1U	25.739
TP35525	1U	28.548
TP12804	1U	28.908
TP42411	1U	59.338
TP5235	1U	62.003
TP43414	1U	63.154
TP17946	1U	63.514
TP41753	1U	63.514
TP32272	1U	63.514
TP14185	1U	66.683
TP6355	1U	69.42
TP38454	1U	69.42
TP1385	1U	69.42
TP18447	1U	69.42
TP5919	1U	69.42
TP36886	1U	69.42
TP45662	2U	0
TP1752	2U	3.09748
TP3062	2U	3.09748
TP24398	2U	3.09748
TP19904	2U	3.09748
TP32845	2U	3.4572
TP13332	2U	4.24863
TP38843	2U	5.8319
TP39900	2U	6.98318
TP11126	2U	6.98318
TP44904	2U	7.77461
TP11650	2U	7.77461
TP18031	2U	8.56604
TP27621	2U	9.64535
TP7707	2U	10.0051
TP3096	2U	10.3648
TP40278	2U	10.3648
TP44828	2U	11.5161
TP31205	2U	11.5161
TP722	2U	11.8758
TP1229	2U	12.2355
TP7781	2U	12.2355
TP12279	2U	12.2355
TP28799	2U	12.5952
TP45473	2U	12.9549
TP26902	2U	12.9549
TP5087	2U	13.6744
TP36854	2U	13.6744
TP25456	2U	14.0341
TP13818	2U	14.0341
TP17921	2U	14.3939
TP42570	2U	17.4191
TP8605	2U	17.4191
TP42284	2U	18.2106
TP5159	2U	18.2106
TP12133	2U	18.2106
TP5839	2U	18.6422
TP1902	2U	19.0019
TP42887	2U	19.3617
TP15035	2U	19.3617
TP8081	2U	19.3617
TP2328	2U	20.9449
TP17578	2U	21.7364
TP42948	2U	23.968
TP31749	2U	24.6875
TP882	2U	26.9913
TP30372	2U	26.9913
TP27187	2U	26.9913
TP15964	2U	27.7827
TP30158	2U	28.934
TP45686	2U	28.934
TP35585	2U	28.934
TP4646	2U	30.3733
TP35076	2U	30.3733
TP5960	2U	30.3733
TP31492	2U	30.3733
TP39357	2U	32.2446
TP44908	2U	32.2446
TP37894	2U	32.2446
TP25441	2U	32.6044
TP30456	2U	32.6044
TP38720	2U	32.6044
TP45136	2U	34.1156
TP7641	2U	34.4753
TP38960	2U	34.4753
TP5362	2U	34.4753
TP4361	2U	34.4753
TP3417	2U	34.4753
TP15103	2U	34.4753
TP15817	2U	34.8351
TP13145	2U	34.8351
TP17450	2U	34.8351
TP21020	2U	35.1948
TP32032	2U	35.1948
TP4578	2U	36.706
TP6605	2U	37.4255
TP45991	2U	37.7852
TP38193	2U	37.7852
TP35497	2U	37.7852
TP28488	2U	37.7852
TP30112	2U	37.7852
TP45776	2U	37.7852
TP23910	2U	39.6566
TP2625	2U	39.6566
TP19378	2U	40.7359
TP29759	2U	40.7359
TP22729	2U	40.7359
TP43057	2U	42.6073
TP23584	2U	42.6073
TP8589	2U	42.967
TP46233	2U	42.967
TP44922	2U	44.0463
TP23043	2U	44.0463
TP13018	2U	44.406
TP10680	2U	44.7657
TP40429	2U	44.7657
TP42715	2U	47.358
TP10202	2U	50.3833
TP44890	2U	50.743
TP41561	2U	50.743
TP21827	2U	50.743
TP28171	2U	51.1027
TP13071	2U	51.8222
TP24004	2U	51.8222
TP345	2U	51.8222
TP971	2U	53.3334
TP30264	2U	54.4127
TP42042	2U	54.7724
TP45288	2U	55.8517
TP8024	2U	55.8517
TP24217	2U	55.8517
TP18076	2U	55.8517
TP10199	2U	55.8517
TP1953	2U	55.8517
TP13976	2U	56.2115
TP9862	2U	57.2908
TP27945	2U	57.2908
TP22634	2U	57.2908
TP25819	2U	58.442
TP45703	2U	58.442
TP31295	2U	58.8018
TP13047	2U	59.1615
TP22159	2U	59.1615
TP44255	2U	59.5212
TP44256	2U	59.5212
TP29389	2U	59.5212
TP5700	2U	59.8809
TP32257	2U	59.8809
TP22089	2U	61.3202
TP31695	2U	61.6799
TP999	2U	61.6799
TP21402	2U	61.6799
TP41719	2U	61.6799
TP21392	2U	62.3994
TP29061	2U	63.4787
TP44342	2U	63.8384
TP38009	2U	64.1981
TP6501	2U	64.1981
TP7875	2U	64.1981
TP42841	2U	64.1981
TP7028	2U	64.9176
TP34192	2U	65.2773
TP3120	2U	65.9968
TP21434	2U	65.9968
TP9895	2U	65.9968
TP30859	2U	65.9968
TP12177	2U	65.9968
TP36331	2U	66.3565
TP2296	2U	66.3565
TP5175	2U	66.3565
TP41513	2U	66.3565
TP38376	2U	66.3565
TP20226	2U	66.3565
TP9671	2U	66.7162
TP36453	2U	66.7162
TP26071	2U	67.0759
TP4147	2U	67.0759
TP19831	2U	67.0759
TP31045	2U	67.0759
TP18974	2U	67.0759
TP43349	2U	67.4356
TP43717	2U	67.4356
TP6568	2U	67.4356
TP36009	2U	67.4356
TP489	2U	67.4356
TP33492	2U	67.4356
TP43125	2U	67.4356
TP19066	2U	67.4356
TP4144	2U	67.4356
TP24138	2U	67.4356
TP35470	2U	67.4356
TP26541	2U	67.4356
TP23913	2U	67.4356
TP31786	2U	67.4356
TP42904	2U	67.4356
TP16348	2U	67.4356
TP16009	2U	67.4356
TP2094	2U	67.4356
TP4849	2U	67.7954
TP18121	2U	67.7954
TP42737	2U	67.7954
TP3739	2U	68.1551
TP22424	2U	68.1551
TP31496	2U	68.5148
TP3608	2U	68.5148
TP35889	2U	68.5148
TP30947	2U	68.5148
TP38362	2U	68.5148
TP2246	2U	68.5148
TP43412	2U	68.5148
TP45366	2U	68.5148
TP43698	2U	69.5941
TP25477	2U	71.1054
TP40098	2U	71.4651
TP9793	2U	72.6164
TP13016	2U	72.9761
TP11542	2U	72.9761
TP30228	2U	72.9761
TP9315	2U	73.3358
TP21472	2U	73.7675
TP39766	2U	73.7675
TP26460	2U	73.7675
TP8388	2U	73.7675
TP17116	2U	74.5589
TP20997	2U	74.5589
TP27519	2U	74.9186
TP38249	2U	77.583
TP37555	2U	77.9427
TP11101	2U	78.3024
TP19169	2U	78.3024
TP8687	2U	78.6622
TP14531	2U	78.6622
TP2381	2U	79.0219
TP44067	2U	79.0219
TP17463	2U	79.3816
TP31787	2U	81.325
TP36190	2U	82.4763
TP19699	2U	82.836
TP45923	2U	83.1957
TP6082	2U	83.1957
TP4558	2U	83.1957
TP34301	2U	83.5555
TP28218	2U	84.7787
TP29611	2U	84.7787
TP40115	2U	84.7787
TP5701	2U	85.1384
TP24305	2U	85.1384
TP12709	2U	86.2177
TP716	2U	86.9372
TP3142	2U	88.8086
TP37357	2U	89.1683
TP3599	2U	89.1683
TP17745	2U	89.528
TP1825	2U	90.6073
TP31155	2U	90.6073
TP36069	2U	92.4787
TP40200	2U	95.1431
TP154	2U	97.0865
TP1113	2U	97.4462
TP28258	2U	97.806
TP28339	2U	97.806
TP36547	2U	97.806
TP10924	2U	97.806
TP41725	2U	98.1657
TP4370	2U	99.245
TP36512	2U	102.417
TP29939	2U	102.777
TP12756	2U	102.777
TP43978	2U	102.777
TP486	2U	102.777
TP35357	2U	104
TP27581	3U	0
TP2550	3U	3.09748
TP20286	3U	5.40127
TP33656	3U	6.55255
TP4445	3U	6.91227
TP18477	3U	6.91227
TP31959	3U	14.0833
TP9885	3U	16.8199
TP37309	3U	18.7633
TP19722	3U	20.2746
TP3518	3U	23.8056
TP4205	3U	24.1653
TP41688	3U	24.525
TP27066	3U	24.8848
TP44537	3U	24.8848
TP33817	3U	24.8848
TP44703	3U	24.8848
TP44670	3U	24.8848
TP18029	3U	24.8848
TP14491	3U	25.9641
TP37040	3U	27.7634
TP14364	3U	27.7634
TP39240	3U	28.4829
TP3212	3U	29.5622
TP8648	3U	29.9219
TP19145	3U	30.3536
TP41284	3U	30.3536
TP29548	3U	30.3536
TP6343	3U	30.3536
TP29559	3U	30.3536
TP15895	3U	31.5768
TP5504	3U	31.5768
TP29954	3U	31.9365
TP36639	3U	31.9365
TP17673	3U	32.2963
TP14039	3U	32.2963
TP16041	3U	32.2963
TP26172	3U	32.2963
TP41754	3U	32.2963
TP34868	3U	33.0157
TP9794	3U	33.3754
TP45176	3U	33.7352
TP10424	3U	33.7352
TP4720	3U	33.7352
TP16866	3U	34.0949
TP46166	3U	34.8144
TP42210	3U	35.1741
TP22528	3U	35.1741
TP35334	3U	35.1741
TP38090	3U	35.1741
TP38674	3U	35.5338
TP45906	3U	35.5338
TP9148	3U	35.5338
TP10853	3U	35.5338
TP25283	3U	35.5338
TP2295	3U	35.5338
TP26738	3U	35.5338
TP5923	3U	36.2533
TP6966	3U	36.613
TP30234	3U	36.613
TP25240	3U	36.613
TP1505	3U	36.613
TP35011	3U	36.613
TP25837	3U	36.613
TP38742	3U	36.613
TP33324	3U	36.613
TP6416	3U	36.613
TP7494	3U	36.613
TP10313	3U	36.613
TP11273	3U	36.613
TP4857	3U	36.613
TP29569	3U	36.613
TP43780	3U	36.613
TP30247	3U	36.9727
TP13744	3U	36.9727
TP5993	3U	36.9727
TP29801	3U	36.9727
TP24834	3U	36.9727
TP10492	3U	36.9727
TP252	3U	36.9727
TP731	3U	36.9727
TP2500	3U	37.3324
TP19836	3U	37.3324
TP30567	3U	37.3324
TP25084	3U	37.3324
TP27760	3U	37.3324
TP37762	3U	37.3324
TP4365	3U	37.6921
TP30168	3U	38.0519
TP7482	3U	38.8433
TP20164	3U	39.225
TP2576	3U	39.225
TP42051	3U	39.225
TP35948	3U	40.3763
TP10082	3U	40.736
TP12908	3U	40.736
TP922	3U	41.4555
TP30916	3U	42.1749
TP5464	3U	42.1749
TP35319	3U	42.1749
TP2815	3U	42.1749
TP20249	3U	42.5347
TP26688	3U	42.5347
TP5151	3U	42.5347
TP29690	3U	42.5347
TP31164	3U	42.5347
TP7693	3U	42.8944
TP40788	3U	43.2541
TP6470	3U	43.2541
TP31821	3U	43.6138
TP5583	3U	43.6138
TP32548	3U	43.6138
TP13401	3U	43.6138
TP6190	3U	43.9735
TP30770	3U	43.9735
TP19215	3U	44.765
TP3082	3U	44.765
TP12020	3U	44.765
TP561	3U	45.1247
TP38895	3U	45.4844
TP28214	3U	45.4844
TP30095	3U	45.4844
TP13927	3U	45.8441
TP3925	3U	49.2306
TP43347	3U	51.5344
TP33730	3U	53.0456
TP36371	3U	53.837
TP20327	3U	65.5751
TP16512	3U	68.6003
TP25806	3U	69.3198
TP5895	3U	71.5515
TP3780	3U	72.271
TP35059	3U	72.271
TP200	3U	73.4223
TP19770	3U	73.782
TP56	3U	73.782
TP1667	3U	74.5014
TP3121	3U	74.5014
TP38571	3U	74.5014
TP37632	3U	76.3728
TP40369	3U	77.0923
TP38896	3U	77.0923
TP37355	3U	78.1716
TP34744	3U	78.5313
TP5124	3U	80.4027
TP26328	3U	80.4027
TP7159	3U	80.7624
TP2823	3U	81.4819
TP4711	3U	81.4819
TP26423	3U	81.8416
TP38711	3U	82.2013
TP24822	3U	82.2013
TP14118	3U	83.3526
TP13339	3U	84.0721
TP11763	3U	85.9435
TP4959	3U	85.9435
TP17051	3U	86.3032
TP25059	3U	87.0946
TP9615	3U	87.4543
TP30928	3U	88.9656
TP21805	3U	90.0449
TP26124	3U	90.4046
TP13594	3U	90.7643
TP9267	3U	91.5558
TP34859	3U	93.8595
TP21027	3U	93.8595
TP45243	3U	93.8595
TP15970	3U	94.2193
TP25102	3U	94.2193
TP336	3U	94.2193
TP4420	3U	94.2193
TP988	3U	98.4016
TP9427	3U	99.1211
TP2925	3U	99.1211
TP44869	3U	99.1211
TP32150	3U	99.1211
TP32756	3U	99.1211
TP33490	3U	99.1211
TP5964	3U	99.4808
TP397	3U	99.4808
TP31073	3U	99.8406
TP44088	3U	99.8406
TP7698	3U	99.8406
TP36615	3U	99.8406
TP23280	3U	99.8406
TP30696	3U	100.2
TP35490	3U	100.2
TP37755	3U	100.2
TP3743	3U	100.2
TP43210	3U	100.2
TP28544	3U	100.2
TP11874	3U	100.2
TP12635	3U	102.072
TP24221	3U	103.151
TP42950	3U	103.511
TP39141	3U	105.022
TP1078	3U	105.022
TP25264	3U	105.813
TP45085	3U	106.173
TP11973	3U	107.324
TP1849	3U	108.044
TP6147	3U	110.276
TP11644	3U	110.276
TP42967	3U	110.276
TP39118	3U	110.276
TP5239	3U	110.276
TP41368	3U	110.635
TP40450	4U	0
TP43630	4U	0.359718
TP23887	4U	1.07919
TP16998	4U	1.07919
TP2151	4U	1.07919
TP25250	4U	1.07919
TP37332	4U	5.0523
TP40735	4U	7.284
TP31250	4U	8.3633
TP6790	4U	8.72302
TP16750	4U	8.72302
TP6597	4U	8.72302
TP22072	4U	9.08274
TP32325	4U	9.08274
TP28428	4U	9.08274
TP4430	4U	9.08274
TP8756	4U	9.44246
TP8945	4U	9.44246
TP3357	4U	9.80218
TP22263	4U	10.5217
TP11962	4U	12.393
TP19508	4U	12.393
TP34599	4U	12.7527
TP1910	4U	13.4722
TP17226	4U	16.2088
TP12807	4U	17.792
TP38051	4U	18.1517
TP36146	4U	18.1517
TP5809	4U	18.1517
TP18478	4U	18.5115
TP42930	4U	18.5115
TP1148	4U	19.2309
TP23039	4U	19.2309
TP43506	4U	19.5907
TP30673	4U	19.5907
TP22171	4U	20.3101
TP4296	4U	20.3101
TP3627	4U	20.6698
TP4477	4U	20.6698
TP34374	4U	21.0296
TP34574	4U	21.0296
TP45512	4U	21.3893
TP12831	4U	21.3893
TP21189	4U	21.3893
TP16784	4U	21.3893
TP9174	4U	21.3893
TP43571	4U	21.3893
TP1873	4U	21.3893
TP9804	4U	21.749
TP42937	4U	22.1087
TP6918	4U	22.1087
TP28705	4U	22.1087
TP15100	4U	22.1087
TP44478	4U	22.4684
TP9802	4U	24.4839
TP20014	4U	24.8436
TP858	4U	24.8436
TP4303	4U	25.2034
TP7326	4U	25.2034
TP9086	4U	25.5631
TP42349	4U	25.5631
TP23302	4U	25.9228
TP26959	4U	25.9228
TP17714	4U	25.9228
TP35905	4U	25.9228
TP3949	4U	25.9228
TP24395	4U	25.9228
TP19134	4U	26.6423
TP21312	4U	26.6423
TP26946	4U	27.7216
TP40403	4U	28.441
TP39672	4U	28.441
TP26872	4U	28.441
TP13685	4U	28.441
TP28543	4U	28.441
TP12837	4U	28.441
TP28601	4U	28.441
TP3063	4U	28.441
TP13934	4U	30.6727
TP45735	4U	31.3922
TP27230	4U	31.3922
TP33809	4U	31.3922
TP1445	4U	31.7519
TP32822	4U	31.7519
TP12687	4U	32.9032
TP3016	4U	33.6227
TP45770	4U	34.3422
TP36738	4U	35.0616
TP10951	4U	36.1409
TP4286	4U	37.6522
TP6564	4U	37.6522
TP23874	4U	37.6522
TP26988	4U	38.0119
TP36030	4U	38.0119
TP6844	4U	38.3716
TP13546	4U	39.4509
TP31458	4U	40.1704
TP6988	4U	40.8899
TP26024	4U	41.2496
TP19553	4U	41.6093
TP3891	4U	41.6093
TP6926	4U	43.0486
TP42472	4U	44.1279
TP17711	4U	45.2072
TP42691	4U	45.9267
TP31039	4U	46.6461
TP33971	4U	47.0058
TP15929	4U	47.0058
TP169	4U	47.7253
TP6914	4U	47.7253
TP37596	4U	47.7253
TP168	4U	48.085
TP42257	4U	49.9564
TP37566	4U	50.3161
TP12619	4U	51.0356
TP13375	4U	51.0356
TP30324	4U	51.0356
TP37352	4U	52.907
TP25965	4U	52.907
TP21916	4U	52.907
TP18627	4U	52.907
TP36689	4U	53.2667
TP25026	4U	53.2667
TP32699	4U	54.7059
TP29674	4U	55.0657
TP38861	4U	55.7851
TP6936	4U	56.1449
TP949	4U	56.1449
TP21022	4U	56.1449
TP18217	4U	56.8643
TP29463	4U	59.1681
TP44966	4U	61.1115
TP43153	4U	61.4713
TP29178	4U	61.831
TP39422	4U	62.5505
TP21668	4U	62.9102
TP23284	4U	62.9102
TP12997	4U	63.2699
TP26771	4U	63.2699
TP44212	4U	63.2699
TP1895	4U	63.2699
TP43395	4U	63.2699
TP29634	4U	63.2699
TP19605	4U	64.4212
TP30092	4U	64.4212
TP29386	4U	64.4212
TP24905	4U	64.7809
TP41444	4U	64.7809
TP18306	4U	64.7809
TP11845	4U	64.7809
TP43155	4U	64.7809
TP14728	4U	64.7809
TP27373	4U	64.7809
TP10336	4U	64.7809
TP8914	4U	64.7809
TP588	4U	64.7809
TP2557	4U	64.7809
TP24076	4U	64.7809
TP22977	4U	65.5004
TP42188	4U	65.8601
TP40393	4U	65.8601
TP14038	4U	66.5796
TP951	4U	66.5796
TP32608	4U	66.9393
TP18193	4U	66.9393
TP13188	4U	66.9393
TP23448	4U	66.9393
TP11835	4U	66.9393
TP39347	4U	66.9393
TP6225	4U	67.299
TP30277	4U	67.299
TP6482	4U	68.8102
TP7633	4U	68.8102
TP7644	4U	68.8102
TP43812	4U	68.8102
TP14935	4U	68.8102
TP5344	4U	68.8102
TP36495	4U	69.17
TP16777	4U	69.8894
TP38661	4U	69.8894
TP5263	4U	71.7608
TP41550	4U	72.9121
TP14096	4U	72.9121
TP43451	4U	72.9121
TP24192	4U	72.9121
TP20196	4U	72.9121
TP3897	4U	73.2718
TP1628	4U	73.2718
TP23031	4U	73.2718
TP23564	4U	73.2718
TP15908	4U	73.2718
TP3989	4U	73.6315
TP43896	4U	74.7828
TP37106	4U	74.7828
TP13798	4U	76.2941
TP543	4U	76.2941
TP20705	4U	77.0135
TP36778	4U	77.3733
TP8559	4U	78.0927
TP38916	4U	78.0927
TP28469	4U	78.4525
TP25784	4U	78.4525
TP14315	4U	78.4525
TP23862	4U	78.4525
TP16159	4U	78.8122
TP5973	4U	79.5316
TP361	4U	79.8914
TP17040	4U	79.8914
TP11370	4U	81.3306
TP24617	4U	81.3306
TP12643	4U	81.3306
TP7586	4U	82.4099
TP2427	4U	83.8492
TP10117	4U	84.2089
TP10116	4U	84.2089
TP11540	4U	84.5686
TP41939	4U	86.0799
TP12240	4U	86.0799
TP16834	4U	86.0799
TP9457	4U	86.4396
TP45135	4U	86.7993
TP2806	4U	87.159
TP42824	4U	87.159
TP17148	4U	87.159
TP4614	4U	87.159
TP5796	4U	87.5187
TP33197	4U	87.5187
TP26846	4U	87.5187
TP43359	4U	87.5187
TP8431	4U	87.5187
TP30912	4U	87.5187
TP26633	4U	87.5187
TP43187	4U	88.2382
TP43497	4U	88.2382
TP28813	4U	88.5979
TP12999	4U	89.3894
TP32122	4U	89.7491
TP13446	4U	89.7491
TP32662	4U	90.1088
TP42870	4U	90.1088
TP37808	4U	90.8283
TP14644	4U	90.8283
TP34733	4U	90.8283
TP17535	4U	91.188
TP349	4U	92.2673
TP37666	4U	94.1387
TP13595	4U	94.4984
TP9809	4U	94.4984
TP28236	4U	94.4984
TP42574	4U	94.4984
TP37399	4U	94.4984
TP44392	4U	94.4984
TP22559	4U	94.4984
TP39612	4U	94.4984
TP14065	4U	94.4984
TP16722	4U	94.4984
TP32999	4U	94.4984
TP31252	4U	94.4984
TP43143	4U	94.4984
TP29251	4U	94.4984
TP37227	4U	94.4984
TP26725	4U	94.4984
TP11716	4U	94.4984
TP29159	4U	94.4984
TP34772	4U	94.4984
TP29681	4U	94.4984
TP12555	4U	94.4984
TP2067	4U	94.4984
TP32858	4U	94.4984
TP11221	4U	94.4984
TP23129	4U	94.8581
TP9692	4U	95.2178
TP12877	4U	95.2178
TP7941	4U	95.9373
TP36292	4U	96.297
TP28432	4U	96.297
TP42714	4U	96.297
TP27954	4U	96.297
TP32268	4U	96.6567
TP38123	4U	97.3762
TP32152	4U	97.7359
TP673	4U	98.8152
TP18703	4U	98.8152
TP27568	4U	99.9665
TP20676	4U	99.9665
TP33872	4U	99.9665
TP2001	4U	101.91
TP12395	4U	102.701
TP30899	4U	103.853
TP24569	4U	104.212
TP5986	4U	104.572
TP20654	4U	104.932
TP18596	4U	104.932
TP27451	4U	104.932
TP40806	4U	106.443
TP854	4U	106.803
TP16661	4U	108.674
TP44351	4U	108.674
TP30726	4U	108.674
TP40807	4U	108.674
TP22211	4U	108.674
TP12714	4U	108.674
TP38460	4U	108.674
TP13439	4U	108.674
TP26472	4U	108.674
TP1059	4U	109.034
TP1657	4U	110.185
TP11905	4U	110.185
TP18087	4U	111.696
TP21143	4U	112.776
TP43036	4U	115.152
TP14912	4U	116.303
TP18082	4U	116.663
TP44396	4U	116.663
TP11932	4U	116.663
TP6071	4U	116.663
TP34749	4U	117.022
TP40405	4U	117.022
TP28606	4U	117.382
TP2615	4U	118.102
TP9918	4U	118.102
TP15245	4U	118.102
TP23839	4U	118.461
TP41775	4U	118.821
TP21192	4U	118.821
TP580	4U	119.181
TP37570	4U	120.692
TP37890	4U	120.692
TP18674	4U	120.692
TP1324	4U	120.692
TP37661	4U	120.692
TP26421	4U	121.052
TP34883	4U	121.052
TP3409	4U	121.052
TP4744	4U	121.052
TP9853	4U	121.052
TP29012	4U	121.052
TP2597	4U	121.052
TP43589	4U	121.411
TP7889	4U	121.411
TP8658	4U	121.771
TP1517	4U	121.771
TP41770	4U	121.771
TP16172	4U	121.771
TP13596	4U	122.131
TP45305	4U	123.642
TP11345	4U	125.946
TP6193	4U	126.665
TP41190	4U	127.385
TP21929	4U	127.385
TP38910	4U	128.464
TP7006	4U	128.824
TP1315	4U	129.184
TP37251	4U	130.335
TP33070	4U	131.054
TP3242	4U	131.414
TP27957	4U	131.414
TP33675	4U	131.414
TP3420	4U	131.414
TP1735	4U	132.565
TP10893	4U	132.925
TP3610	4U	133.644
TP9964	4U	134.004
TP16664	4U	134.004
TP34875	4U	134.364
TP25832	4U	134.364
TP26438	4U	134.724
TP4759	4U	135.083
TP3140	4U	135.803
TP34199	4U	135.803
TP14744	4U	136.163
TP4649	4U	137.962
TP25347	4U	140.194
TP9478	4U	142.065
TP18483	4U	142.065
TP25891	4U	142.784
TP30465	4U	143.144
TP1233	4U	143.144
TP11005	4U	145.088
TP24423	4U	146.599
TP31105	4U	147.318
TP29493	4U	149.19
TP13116	4U	149.19
TP14514	4U	149.909
TP37134	4U	150.988
TP18416	4U	151.708
TP41081	4U	153.147
TP26696	5U	0
TP19832	5U	1.22327
TP35956	5U	1.22327
TP18283	5U	2.0147
TP4765	5U	2.37442
TP17299	5U	3.59768
TP13059	5U	4.38912
TP26853	5U	5.18055
TP2540	5U	5.18055
TP25449	5U	5.54027
TP35962	5U	5.54027
TP43635	5U	5.54027
TP35321	5U	5.54027
TP30841	5U	5.54027
TP5835	5U	7.48369
TP6858	5U	8.99494
TP19391	5U	11.6593
TP22000	5U	12.3788
TP34005	5U	13.8901
TP2813	5U	13.8901
TP30717	5U	14.2498
TP18822	5U	14.6095
TP27178	5U	16.1207
TP43474	5U	17.632
TP17277	5U	17.632
TP19834	5U	18.7833
TP2243	5U	18.7833
TP36103	5U	19.143
TP41203	5U	20.5822
TP28235	5U	20.5822
TP1908	5U	20.942
TP31780	5U	20.942
TP10890	5U	22.0932
TP39795	5U	22.453
TP33117	5U	22.453
TP20830	5U	23.2444
TP15520	5U	23.6041
TP30575	5U	24.3236
TP17151	5U	24.3236
TP33075	5U	24.3236
TP28341	5U	24.3236
TP12102	5U	25.0431
TP25604	5U	25.4028
TP16415	5U	25.4028
TP25319	5U	25.4028
TP23787	5U	28.0672
TP42576	5U	28.7866
TP27446	5U	28.7866
TP44637	5U	28.7866
TP10398	5U	28.7866
TP33338	5U	28.7866
TP20218	5U	29.1464
TP14517	5U	30.6576
TP23870	5U	30.6576
TP46155	5U	32.0969
TP24204	5U	32.0969
TP10533	5U	32.8163
TP38627	5U	33.8956
TP35689	5U	34.6151
TP34767	5U	35.3346
TP33093	5U	35.6943
TP38911	5U	36.054
TP15447	5U	36.054
TP32712	5U	36.054
TP4199	5U	36.7735
TP39512	5U	37.1332
TP12699	5U	37.1332
TP3189	5U	37.1332
TP3827	5U	37.1332
TP6786	5U	38.6445
TP11366	5U	38.6445
TP10756	5U	38.6445
TP19167	5U	38.6445
TP12563	5U	39.0042
TP14053	5U	39.0042
TP18051	5U	39.0042
TP17233	5U	39.0042
TP12560	5U	39.0042
TP24417	5U	39.0042
TP3144	5U	39.0042
TP2871	5U	39.0042
TP26265	5U	39.0042
TP3338	5U	39.0042
TP39598	5U	39.0042
TP25579	5U	39.0042
TP18414	5U	40.0835
TP16130	5U	40.0835
TP29516	5U	40.0835
TP17442	5U	40.4432
TP1430	5U	40.8029
TP14331	5U	41.1626
TP4444	5U	41.1626
TP38678	5U	43.3943
TP41488	5U	43.3943
TP40508	5U	43.3943
TP19683	5U	43.3943
TP31824	5U	43.3943
TP3141	5U	43.3943
TP37958	5U	44.8336
TP18426	5U	44.8336
TP1623	5U	44.8336
TP18733	5U	44.8336
TP34381	5U	44.8336
TP4504	5U	44.8336
TP4367	5U	44.8336
TP43999	5U	44.8336
TP42444	5U	45.1933
TP26389	5U	45.1933
TP18074	5U	45.1933
TP39173	5U	45.1933
TP22189	5U	46.2726
TP11642	5U	46.9921
TP17236	5U	49.5843
TP3324	5U	49.9441
TP1973	5U	50.3038
TP29574	5U	50.6635
TP19368	5U	53.2557
TP5364	5U	53.2557
TP28696	5U	53.2557
TP35983	5U	53.2557
TP43771	5U	53.2557
TP7431	5U	53.2557
TP34843	5U	53.9752
TP41063	5U	54.6947
TP27861	5U	54.6947
TP7552	5U	54.6947
TP14795	5U	55.0544
TP28348	5U	56.1337
TP31209	5U	56.8532
TP40956	5U	58.2924
TP20856	5U	58.2924
TP44176	5U	59.0119
TP32654	5U	59.0119
TP39726	5U	59.7314
TP38146	5U	62.6844
TP5423	5U	63.8357
TP33053	5U	63.8357
TP23989	5U	64.1954
TP7627	5U	64.1954
TP6488	5U	64.1954
TP35869	5U	64.9149
TP4709	5U	66.0662
TP45967	5U	66.4259
TP22741	5U	67.5772
TP5599	5U	67.9369
TP2080	5U	68.2966
TP18664	5U	68.2966
TP13946	5U	68.2966
TP12342	5U	68.2966
TP8639	5U	69.0881
TP28133	5U	69.4818
TP29005	5U	69.4818
TP42699	5U	69.9135
TP23882	5U	70.7768
TP7064	5U	71.5683
TP17474	5U	71.928
TP38310	5U	71.928
TP5677	5U	71.928
TP18128	5U	72.2877
TP8967	5U	73.0072
TP6653	5U	73.0072
TP12867	5U	73.3669
TP14317	5U	74.5902
TP37658	5U	74.5902
TP20077	5U	74.5902
TP43138	5U	76.3175
TP39460	5U	76.3175
TP6069	5U	76.3175
TP39470	5U	76.3175
TP28368	5U	76.3175
TP39072	5U	77.5407
TP21184	5U	77.9005
TP9816	5U	79.4117
TP30153	5U	79.4117
TP20070	5U	80.2031
TP12049	5U	80.2031
TP1661	5U	80.2031
TP23352	5U	80.5629
TP8917	5U	83.0109
TP1380	5U	83.0109
TP4527	5U	83.0109
TP38909	5U	83.0109
TP9666	5U	83.0109
TP230	5U	83.0109
TP19158	5U	86.1083
TP39893	5U	86.4681
TP22790	5U	87.6193
TP28852	5U	87.6193
TP41309	5U	87.6193
TP4411	5U	88.3388
TP18337	5U	88.7705
TP29439	5U	89.9938
TP39083	5U	90.3535
TP5361	5U	90.3535
TP2858	5U	90.7132
TP6435	5U	91.0729
TP11774	5U	91.4326
TP3667	5U	91.4326
TP1917	5U	91.4326
TP38578	5U	91.4326
TP9262	5U	91.4326
TP28827	5U	91.4326
TP41610	5U	91.4326
TP29404	5U	91.4326
TP27583	5U	91.4326
TP28809	5U	91.4326
TP13792	5U	92.5119
TP8466	5U	92.5119
TP44253	5U	92.8716
TP34666	5U	93.2314
TP44928	5U	93.2314
TP3884	5U	93.2314
TP43541	5U	93.2314
TP36164	5U	93.5911
TP15150	5U	93.5911
TP25479	5U	93.5911
TP4317	5U	93.5911
TP12291	5U	93.9508
TP35843	5U	93.9508
TP14673	5U	94.3105
TP2163	5U	94.6702
TP9933	5U	94.6702
TP33118	5U	95.3897
TP22707	5U	95.3897
TP38373	5U	95.3897
TP12614	5U	95.3897
TP38240	5U	95.3897
TP45064	5U	95.7494
TP975	5U	96.1092
TP44401	5U	96.1092
TP15011	5U	96.1092
TP34303	5U	96.1092
TP33190	5U	96.4689
TP33914	5U	96.8286
TP30499	5U	98.0625
TP14362	5U	99.9339
TP24042	6U	0
TP26659	6U	0
TP45196	6U	1.51125
TP34750	6U	1.51125
TP16366	6U	1.51125
TP29256	6U	1.51125
TP12841	6U	8.6089
TP43735	6U	14.9821
TP7676	6U	15.3418
TP22108	6U	16.2131
TP33041	6U	18.8775
TP3320	6U	20.3168
TP34725	6U	21.3961
TP34562	6U	22.4754
TP15054	6U	22.8351
TP17300	6U	24.2743
TP23765	6U	24.634
TP27979	6U	24.634
TP23502	6U	26.5054
TP12690	6U	27.2249
TP14807	6U	27.9444
TP29902	6U	29.0237
TP23291	6U	29.7431
TP18377	6U	33.2795
TP25046	6U	33.2795
TP46013	6U	33.6392
TP19457	6U	34.3587
TP7318	6U	35.438
TP44885	6U	35.438
TP1516	6U	39.6203
TP38892	6U	39.9801
TP26586	6U	40.3398
TP15856	6U	42.5715
TP9670	6U	43.291
TP29471	6U	43.291
TP1481	6U	43.6507
TP14685	6U	44.0104
TP39904	6U	44.0104
TP14783	6U	44.0104
TP7139	6U	44.0104
TP14658	6U	46.2421
TP16792	6U	46.2421
TP24265	6U	46.2421
TP6030	6U	47.0335
TP39479	6U	47.3932
TP42770	6U	48.4725
TP7003	6U	48.4725
TP32550	6U	48.8323
TP31463	6U	48.8323
TP33386	6U	49.6237
TP5372	6U	51.1349
TP38654	6U	51.1349
TP25108	6U	51.1349
TP17531	6U	51.1349
TP26532	6U	51.1349
TP35966	6U	51.4947
TP4081	6U	52.646
TP11220	6U	52.646
TP38980	6U	52.646
TP38320	6U	52.646
TP38882	6U	53.7972
TP31018	6U	54.157
TP33721	6U	54.157
TP10011	6U	54.157
TP3245	6U	54.157
TP16817	6U	54.157
TP10880	6U	54.157
TP19077	6U	54.157
TP21598	6U	54.5167
TP28094	6U	54.5167
TP32303	6U	54.8764
TP23734	6U	54.8764
TP34260	6U	54.8764
TP31202	6U	55.5959
TP12185	6U	55.9556
TP41718	6U	55.9556
TP45871	6U	55.9556
TP1180	6U	56.3153
TP13415	6U	56.3153
TP18044	6U	56.675
TP2173	6U	56.675
TP18634	6U	56.675
TP22197	6U	56.675
TP18382	6U	57.0347
TP36365	6U	57.0347
TP25831	6U	57.0347
TP1107	6U	57.0347
TP8345	6U	57.0347
TP15516	6U	57.0347
TP18295	6U	57.3945
TP35643	6U	57.3945
TP2473	6U	57.7542
TP37102	6U	57.7542
TP12969	6U	57.7542
TP39872	6U	57.7542
TP36847	6U	57.7542
TP3133	6U	57.7542
TP8456	6U	57.7542
TP37424	6U	57.7542
TP41103	6U	58.1139
TP43615	6U	58.8334
TP20650	6U	58.8334
TP30154	6U	59.1931
TP41273	6U	59.1931
TP3206	6U	59.5528
TP21522	6U	59.9125
TP30283	6U	60.632
TP6393	6U	60.632
TP44484	6U	60.9917
TP41441	6U	60.9917
TP2384	6U	60.9917
TP12306	6U	62.071
TP43283	6U	62.071
TP5691	6U	62.071
TP24820	6U	62.071
TP33537	6U	62.4307
TP27091	6U	62.4307
TP28925	6U	62.4307
TP2598	6U	62.4307
TP34670	6U	62.4307
TP11442	6U	62.4307
TP37027	6U	62.4307
TP13122	6U	62.4307
TP803	6U	62.4307
TP32013	6U	62.4307
TP1564	6U	62.4307
TP3083	6U	62.4307
TP38304	6U	62.4307
TP30881	6U	62.7905
TP29413	6U	62.7905
TP1332	6U	62.7905
TP24193	6U	62.7905
TP6917	6U	62.7905
TP3003	6U	62.7905
TP8299	6U	62.7905
TP36745	6U	62.7905
TP1106	6U	62.7905
TP42322	6U	62.7905
TP8778	6U	62.7905
TP25345	6U	63.1502
TP9650	6U	63.8696
TP24346	6U	63.8696
TP45727	6U	63.8696
TP290	6U	64.2294
TP12970	6U	64.5891
TP33620	6U	64.5891
TP24146	6U	64.9488
TP20829	6U	64.9488
TP21928	6U	64.9488
TP25508	6U	64.9488
TP34048	6U	65.6683
TP44402	6U	65.6683
TP7725	6U	65.6683
TP29397	6U	65.6683
TP29476	6U	65.6683
TP38777	6U	65.6683
TP30552	6U	66.028
TP5791	6U	66.028
TP14383	6U	66.3877
TP37446	6U	66.3877
TP6695	6U	66.3877
TP38528	6U	66.7474
TP16213	6U	66.7474
TP27505	6U	66.7474
TP36064	6U	66.7474
TP45469	6U	66.7474
TP15409	6U	66.7474
TP29121	6U	67.4669
TP35324	6U	67.4669
TP32495	6U	67.4669
TP44440	6U	67.8266
TP10856	6U	67.8266
TP45044	6U	67.8266
TP1504	6U	67.8266
TP41445	6U	67.8266
TP39869	6U	67.8266
TP2518	6U	67.8266
TP5821	6U	67.8266
TP2471	6U	67.8266
TP43386	6U	67.8266
TP42126	6U	67.8266
TP12038	6U	67.8266
TP32286	6U	67.8266
TP26531	6U	67.8266
TP26921	6U	67.8266
TP45632	6U	67.8266
TP44749	6U	67.8266
TP38302	6U	67.8266
TP10134	6U	67.8266
TP8073	6U	67.8266
TP19387	6U	67.8266
TP1066	6U	67.8266
TP28188	6U	67.8266
TP43850	6U	67.8266
TP11466	6U	67.8266
TP5154	6U	67.8266
TP8317	6U	67.8266
TP24041	6U	67.8266
TP34950	6U	67.8266
TP3683	6U	67.8266
TP4797	6U	67.8266
TP31703	6U	67.8266
TP9257	6U	67.8266
TP10182	6U	68.1863
TP34281	6U	68.9058
TP3336	6U	68.9058
TP37416	6U	68.9058
TP18767	6U	69.2655
TP18142	6U	69.2655
TP7248	6U	69.2655
TP19395	6U	69.2655
TP44935	6U	69.985
TP4502	6U	69.985
TP1949	6U	70.3447
TP30764	6U	70.7044
TP37228	6U	70.7044
TP11103	6U	70.7044
TP3108	6U	71.0642
TP26590	6U	71.4239
TP18577	6U	71.4239
TP8901	6U	71.4239
TP41340	6U	71.4239
TP26422	6U	71.4239
TP20165	6U	71.4239
TP35522	6U	71.4239
TP19542	6U	72.1434
TP3558	6U	72.1434
TP18130	6U	72.5031
TP23491	6U	72.5031
TP33160	6U	73.2226
TP17046	6U	73.2226
TP4563	6U	73.5823
TP17159	6U	73.5823
TP29373	6U	73.5823
TP23024	6U	73.5823
TP40317	6U	73.5823
TP14602	6U	73.5823
TP13259	6U	73.5823
TP4795	6U	73.5823
TP5585	6U	74.3017
TP14745	6U	74.3017
TP4164	6U	74.3017
TP34218	6U	74.3017
TP38286	6U	74.3017
TP13389	6U	74.6615
TP2578	6U	75.3809
TP44142	6U	75.3809
TP3966	6U	75.3809
TP34220	6U	75.3809
TP11917	6U	75.3809
TP8207	6U	75.3809
TP41442	6U	75.3809
TP25124	6U	75.3809
TP43818	6U	75.7407
TP27102	6U	76.4601
TP41548	6U	76.4601
TP33346	6U	76.4601
TP1145	6U	76.4601
TP9281	6U	76.4601
TP2917	6U	76.8198
TP2833	6U	77.1796
TP31412	6U	77.1796
TP42998	6U	77.1796
TP18181	6U	77.1796
TP22266	6U	77.1796
TP32810	6U	77.1796
TP43173	6U	77.1796
TP4663	6U	77.1796
TP37035	6U	77.5393
TP29659	6U	77.5393
TP43106	6U	77.5393
TP42923	6U	77.899
TP30073	6U	77.899
TP26536	6U	78.6185
TP6691	6U	78.9782
TP22051	6U	78.9782
TP3926	6U	78.9782
TP44559	6U	79.3379
TP25315	6U	79.3379
TP34481	6U	79.6976
TP39393	6U	79.6976
TP37823	6U	79.6976
TP7316	6U	79.6976
TP45516	6U	80.0573
TP31996	6U	80.7768
TP17470	6U	81.1365
TP17974	6U	82.6478
TP33132	6U	82.6478
TP11022	6U	82.6478
TP35603	6U	83.0075
TP2488	6U	83.0075
TP43746	6U	83.0075
TP6508	6U	83.0075
TP11389	6U	83.0075
TP6647	6U	83.3672
TP41540	6U	83.3672
TP26861	6U	83.3672
TP27356	6U	83.3672
TP8361	6U	83.3672
TP45745	6U	84.0867
TP36582	6U	84.8062
TP740	6U	85.1659
TP9382	6U	85.1659
TP9881	6U	85.8854
TP20325	6U	87.3966
TP5947	6U	88.5479
TP4255	6U	88.5479
TP10144	6U	88.5479
TP5786	6U	88.9076
TP44799	6U	88.9076
TP27928	6U	88.9076
TP34962	6U	89.2673
TP24535	6U	89.2673
TP17417	6U	91.1387
TP28655	6U	91.1387
TP3159	6U	91.4984
TP43679	6U	92.6497
TP9568	6U	93.3692
TP45489	6U	93.3692
TP18920	6U	93.7289
TP3830	6U	94.8802
TP16967	6U	96.7516
TP10774	6U	97.1113
TP7282	6U	97.1113
TP7871	6U	97.8308
TP31213	6U	98.1905
TP25439	6U	98.5502
TP46034	6U	98.9099
TP36028	6U	100.421
TP1589	6U	101.5
TP21239	6U	102.22
TP25009	6U	104.091
TP10496	6U	104.811
TP28344	6U	105.53
TP6548	6U	107.402
TP13309	6U	108.553
TP40233	6U	108.553
TP27697	6U	108.553
TP25417	6U	108.553
TP10596	6U	108.553
TP3303	6U	108.553
TP24778	6U	109.272
TP33540	6U	110.352
TP34628	6U	110.711
TP26537	6U	111.791
TP34719	6U	114.816
TP42513	6U	114.816
TP40411	6U	114.816
TP19979	6U	114.816
TP24607	6U	114.816
TP1374	6U	114.816
TP41097	6U	114.816
TP23919	6U	115.176
TP38761	6U	116.615
TP15934	6U	116.615
TP95	6U	116.975
TP26928	6U	117.334
TP45033	6U	117.334
TP30349	6U	117.694
TP28927	6U	118.845
TP13659	6U	119.205
TP17958	6U	119.205
TP19688	6U	119.205
TP26897	6U	119.565
TP13237	6U	120.644
TP11765	6U	121.867
TP38981	6U	122.299
TP42708	6U	123.091
TP20323	6U	124.962
TP41395	6U	124.962
TP21269	6U	125.322
TP19785	6U	125.322
TP45937	6U	125.322
TP2884	6U	128.275
TP2314	6U	128.994
TP321	6U	129.354
TP17265	6U	130.433
TP43748	6U	131.153
TP13682	6U	132.592
TP26859	7U	0
TP12532	7U	1.94342
TP44232	7U	1.94342
TP2155	7U	1.94342
TP32134	7U	2.30314
TP40339	7U	2.30314
TP35976	7U	12.29
TP1024	7U	15.6764
TP39494	7U	18.2687
TP5744	7U	20.8609
TP1904	7U	27.4455
TP16497	7U	27.4455
TP4425	7U	28.165
TP24211	7U	28.8845
TP41746	7U	31.4767
TP27526	7U	32.1962
TP33504	7U	32.1962
TP1502	7U	32.5559
TP22660	7U	32.5559
TP10121	7U	32.9156
TP8864	7U	34.787
TP39496	7U	35.2932
TP43810	7U	35.6529
TP4047	7U	35.6529
TP16361	7U	36.7322
TP34096	7U	36.7322
TP45056	7U	36.7322
TP32998	7U	37.092
TP40107	7U	37.4517
TP13091	7U	37.8114
TP34660	7U	37.8114
TP9622	7U	37.8114
TP24314	7U	38.5309
TP24637	7U	39.2503
TP23585	7U	39.9698
TP17850	7U	39.9698
TP28930	7U	40.6893
TP18063	7U	40.6893
TP37020	7U	41.049
TP18235	7U	41.4087
TP2472	7U	41.7684
TP22643	7U	42.8477
TP13379	7U	42.8477
TP35445	7U	42.8477
TP41491	7U	43.927
TP39191	7U	45.4383
TP38534	7U	45.4383
TP37964	7U	45.4383
TP43544	7U	45.4383
TP37802	7U	46.2297
TP11864	7U	48.0291
TP28605	7U	48.7485
TP44711	7U	48.7485
TP17796	7U	49.1083
TP16559	7U	49.1083
TP2822	7U	49.468
TP32341	7U	50.9792
TP27610	7U	51.339
TP25732	7U	51.339
TP19498	7U	51.339
TP11969	7U	53.2103
TP34328	7U	55.0097
TP16774	7U	56.881
TP13883	7U	57.6005
TP19675	7U	59.4719
TP14205	7U	63.1476
TP36926	7U	63.1476
TP18698	7U	63.5073
TP21324	7U	64.2268
TP26881	7U	65.3061
TP43338	7U	65.3061
TP5332	7U	65.3061
TP119	7U	65.6658
TP39482	7U	66.0255
TP14068	7U	66.3852
TP14565	7U	66.7449
TP29572	7U	66.7449
TP27432	7U	67.1047
TP6068	7U	67.1047
TP39414	7U	67.1047
TP27042	7U	67.1047
TP21048	7U	67.1047
TP36533	7U	67.1047
TP33262	7U	68.2559
TP44735	7U	68.2559
TP26955	7U	69.6952
TP25689	7U	70.0549
TP22568	7U	71.1342
TP15542	7U	71.4939
TP23524	7U	71.4939
TP2791	7U	71.4939
TP41854	7U	72.2134
TP16748	7U	72.2134
TP34028	7U	72.9329
TP16300	7U	72.9329
TP34054	7U	73.2926
TP15276	7U	73.2926
TP6909	7U	73.2926
TP5825	7U	74.084
TP38649	7U	77.1815
TP36841	7U	77.5412
TP25746	7U	78.3327
TP4762	7U	79.0521
TP23169	7U	79.0521
TP31215	7U	79.0521
TP44468	7U	79.0521
TP17156	7U	79.4118
TP19937	7U	79.4118
TP15518	7U	79.4118
TP10250	7U	80.2033
TP34879	7U	80.563
TP10609	7U	80.563
TP36842	7U	80.563
TP34263	7U	80.9227
TP18168	7U	80.9227
TP24728	7U	81.6422
TP34339	7U	82.0019
TP9784	7U	82.3616
TP380	7U	82.3616
TP3504	7U	82.3616
TP42982	7U	82.3616
TP43983	7U	82.7213
TP45227	7U	82.7213
TP32099	7U	82.7213
TP13972	7U	82.7213
TP22772	7U	83.0811
TP5345	7U	85.3849
TP34624	7U	85.7446
TP31198	7U	85.7446
TP15539	7U	86.464
TP45164	7U	87.1835
TP12929	7U	87.1835
TP19150	7U	87.1835
TP28940	7U	87.1835
TP10649	7U	87.5432
TP43088	7U	87.903
TP44977	7U	88.2627
TP39250	7U	88.6224
TP33607	7U	88.9821
TP43102	7U	89.7735
TP9106	7U	89.7735
TP36665	7U	89.7735
TP18997	7U	89.7735
TP20685	7U	89.7735
TP12636	7U	89.7735
TP12480	7U	89.7735
TP29958	7U	90.9248
TP1238	7U	91.2845
TP35401	7U	92.004
TP19546	7U	92.3637
TP43601	7U	92.7235
TP37824	7U	93.0832
TP18174	7U	93.0832
TP11861	7U	93.4429
TP6785	7U	94.1624
TP8816	7U	94.8818
TP40994	7U	95.2416
TP2832	7U	95.2416
TP20033	7U	97.906
TP45590	7U	97.906
TP44492	7U	99.4172
TP30650	7U	99.4172
TP6692	7U	103.238
TP30415	7U	105.181
TP6854	7U	105.541
TP42002	7U	105.541
TP14191	7U	105.9
TP41173	7U	105.9
TP11659	7U	107.844
TP39674	7U	107.844
TP10693	7U	108.635
TP42752	7U	108.635
TP25854	7U	108.635
TP21803	7U	108.635
TP4738	7U	108.995
TP5489	7U	108.995
TP27193	7U	109.355
TP46124	7U	109.714
TP33811	7U	111.154
TP45029	7U	111.873
TP16597	7U	111.873
TP20662	7U	111.873
TP33248	7U	114.105
TP40594	7U	114.105
TP813	7U	114.465
TP19740	7U	114.824
TP21570	7U	114.824
TP32622	7U	114.824
TP39605	7U	116.336
TP41823	7U	116.336
TP31479	7U	116.336
TP40178	7U	116.336
TP20985	7U	116.695
TP1925	7U	116.695
TP25298	7U	116.695
TP20656	7U	116.695
TP45794	7U	116.695
TP6968	7U	116.695
TP45386	7U	116.695
TP38667	7U	117.055
TP2089	7U	117.415
TP28964	7U	117.774
TP7308	7U	118.854
TP30642	7U	119.573
TP44742	7U	119.933
TP32650	7U	119.933
TP37464	7U	120.652
TP28732	7U	121.012
TP6523	7U	121.372
TP11737	7U	122.091
TP17595	7U	123.171
TP3474	7U	123.171
TP25128	7U	123.171
TP8412	7U	124.682
TP8724	7U	124.682
TP2088	7U	124.682
TP34886	7U	124.682
TP30104	7U	125.473
TP34494	7U	125.833
TP3911	7U	125.833
TP43392	7U	126.552
TP37055	7U	126.912
TP34332	7U	127.272
TP26704	7U	127.272
TP35508	7U	127.272
TP32971	7U	127.272
TP13916	7U	127.632
TP32698	7U	127.632
TP41330	7U	127.632
TP255	7U	127.632
TP9312	7U	128.423
TP982	7U	132.243
TP7954	7U	132.243
TP7559	7U	132.243
TP22966	7U	132.963
TP37291	7U	133.323
TP26067	7U	133.323
TP37438	7U	133.323
TP9146	7U	134.402
TP44845	7U	134.762
TP1452	7U	134.762
TP1358	7U	134.762
TP362	7U	134.762
TP39190	7U	134.762
TP39172	7U	134.762
TP30935	7U	134.762
TP37789	7U	135.121
TP3423	7U	135.481
TP29207	7U	136.56
TP14239	7U	136.56
TP7929	7U	136.56
TP9641	7U	136.92
TP42688	7U	136.92
TP5460	7U	136.92
TP27775	7U	137.28
TP20168	7U	137.999
TP13947	7U	138.719
TP22595	7U	139.079
TP33200	7U	139.079
TP40995	7U	139.438
TP24025	7U	139.438
TP21983	7U	139.798
TP40927	7U	139.798
TP10763	7U	139.798
TP36218	7U	139.798
TP16051	7U	139.798
TP42696	7U	139.798
TP18039	7U	140.158
TP17194	7U	140.158
TP11991	7U	141.597
TP1780	7U	141.597
TP30900	7U	141.957
TP3673	7U	142.676
TP42701	7U	142.676
TP45635	7U	143.036
TP27260	7U	143.036
TP11784	7U	143.396
TP32124	7U	143.755
TP28499	7U	144.475
TP17753	7U	144.475
TP18093	7U	144.475
TP28271	7U	144.834
TP36131	7U	144.834
TP36763	7U	144.834
TP39350	7U	145.554
TP27069	7U	145.554
TP42663	7U	145.914
TP17693	7U	145.914
TP41223	7U	146.273
TP15222	7U	146.633
TP24375	7U	146.633
TP28959	7U	146.633
TP6359	7U	146.993
TP12263	7U	147.712
TP39776	7U	148.432
TP41792	7U	148.432
TP36856	7U	149.151
TP44531	7U	152.465
TP17110	7U	157.737
TP41523	7U	158.456
TP3672	7U	159.535
TP3293	7U	159.895
TP3694	7U	160.615
TP46230	7U	160.615
TP44199	7U	160.974
TP31559	7U	164.361
TP44679	7U	166.232
TP3200	7U	167.311
TP39590	7U	167.311
TP38530	7U	167.671
TP30538	7U	168.031
TP31196	7U	168.396
TP346	7U	168.396
TP8861	7U	168.396
TP28882	7U	169.115
TP26936	7U	170.627
TP13876	7U	171.706
TP10434	7U	171.706
TP39850	7U	172.857
TP30607	7U	172.857

## Sheet: Aeupop2_MSTMap
Linkage maps for Aeupop2 uing MSTMap
Markers	Chr	cM
TP37062	1U	0
TP12036	1U	1.07399
TP6797	1U	2.48376
TP11940	1U	3.55775
TP2652	1U	4.29606
TP36958	1U	4.29606
TP18365	1U	4.29606
TP9663	1U	4.29606
TP1716	1U	4.96724
TP3277	1U	6.30985
TP10417	1U	6.30985
TP24840	1U	6.64542
TP18785	1U	6.64542
TP22136	1U	9.80398
TP19692	1U	10.1396
TP44856	1U	10.8779
TP11364	1U	11.8847
TP18749	1U	13.8562
TP29165	1U	16.7157
TP29741	1U	18.5285
TP15762	1U	19.1997
TP5737	1U	23.9116
TP14622	1U	26.0606
TP14812	1U	27.1346
TP44152	1U	27.8057
TP43284	1U	28.1413
TP41988	1U	28.8125
TP17007	1U	29.8865
TP6532	1U	31.4306
TP25558	1U	32.8404
TP20140	1U	35.5367
TP15585	1U	36.8793
TP12859	1U	39.9705
TP45769	1U	44.547
TP4796	1U	45.6209
TP5596	1U	47.3666
TP16056	1U	48.0378
TP36482	1U	48.709
TP26763	1U	50.7907
TP27231	1U	53.6125
TP38110	2U	0
TP33896	2U	0.738309
TP2708	2U	1.40949
TP15120	2U	1.40949
TP24398	2U	1.74507
TP39315	2U	1.74507
TP2975	2U	1.74507
TP34533	2U	4.16306
TP45811	2U	5.90873
TP44075	2U	6.39759
TP27621	2U	7.13589
TP45053	2U	7.13589
TP11108	2U	7.13589
TP22151	2U	7.13589
TP7707	2U	7.13589
TP17619	2U	7.47147
TP31777	2U	7.80704
TP42764	2U	7.80704
TP45079	2U	10.225
TP8127	2U	10.5606
TP9495	2U	10.5606
TP25456	2U	10.5606
TP34216	2U	10.5606
TP4896	2U	11.2989
TP17921	2U	11.2989
TP35482	2U	11.7016
TP4014	2U	12.1043
TP41829	2U	13.5141
TP12133	2U	13.5141
TP25382	2U	13.8497
TP40872	2U	14.5208
TP40433	2U	15.9306
TP1226	2U	16.2662
TP32529	2U	16.2662
TP940	2U	17.0739
TP35076	2U	19.4919
TP22436	2U	21.2376
TP29382	2U	21.5731
TP2622	2U	22.9157
TP2058	2U	22.9157
TP13805	2U	23.2513
TP38960	2U	23.5869
TP21020	2U	24.2581
TP15110	2U	24.2581
TP38193	2U	26.0037
TP11379	2U	27.0777
TP42238	2U	27.4133
TP23584	2U	28.0845
TP31741	2U	28.0845
TP27162	2U	28.7557
TP43651	2U	29.4268
TP26449	2U	29.4268
TP25498	2U	31.1053
TP19230	2U	31.7765
TP12871	2U	32.1121
TP31354	2U	33.1189
TP24004	2U	35.2007
TP30950	2U	35.2007
TP13071	2U	35.2007
TP29886	2U	35.5362
TP38248	2U	36.2074
TP16144	2U	36.9457
TP13047	2U	36.9457
TP35920	2U	36.9457
TP19294	2U	36.9457
TP25431	2U	36.9457
TP30050	2U	36.9457
TP39302	2U	36.9457
TP28923	2U	36.9457
TP38954	2U	36.9457
TP2172	2U	36.9457
TP29346	2U	36.9457
TP31734	2U	36.9457
TP24370	2U	36.9457
TP20595	2U	36.9457
TP10199	2U	36.9457
TP31948	2U	36.9457
TP18076	2U	36.9457
TP37614	2U	36.9457
TP25819	2U	36.9457
TP13089	2U	36.9457
TP27016	2U	36.9457
TP22159	2U	36.9457
TP45848	2U	37.684
TP1184	2U	37.684
TP22089	2U	37.684
TP32063	2U	37.684
TP12109	2U	37.684
TP23484	2U	38.0196
TP20694	2U	38.0196
TP21392	2U	38.0196
TP18765	2U	38.0196
TP28305	2U	38.7579
TP31481	2U	39.0935
TP42139	2U	39.4291
TP45490	2U	39.4291
TP40346	2U	39.4291
TP12713	2U	39.4291
TP19076	2U	39.7647
TP18974	2U	41.8464
TP5211	2U	41.8464
TP42253	2U	41.8464
TP36189	2U	41.8464
TP3250	2U	41.8464
TP573	2U	41.8464
TP595	2U	43.3905
TP45600	2U	43.3905
TP43349	2U	43.3905
TP34451	2U	43.3905
TP35507	2U	43.3905
TP31339	2U	43.3905
TP21286	2U	43.7932
TP25701	2U	43.7932
TP16009	2U	43.7932
TP30550	2U	43.7932
TP943	2U	44.8001
TP12746	2U	45.4712
TP30287	2U	45.4712
TP488	2U	45.4712
TP489	2U	45.4712
TP41513	2U	45.8068
TP24673	2U	45.8068
TP4987	2U	49.3699
TP16431	2U	49.7055
TP14664	2U	50.041
TP22	2U	50.3766
TP22229	2U	50.3766
TP41737	2U	50.7122
TP27789	2U	51.7862
TP6568	2U	52.1217
TP18121	2U	52.1217
TP16474	2U	52.4573
TP21890	2U	53.5313
TP43412	2U	53.5313
TP5337	2U	53.5313
TP8445	2U	53.8669
TP36452	2U	54.5381
TP10521	2U	54.5381
TP40311	2U	54.5381
TP12130	2U	54.8736
TP4849	2U	55.2092
TP2188	2U	55.5448
TP29694	2U	55.5448
TP19840	2U	55.8804
TP31748	2U	58.2984
TP45491	2U	60.044
TP23781	2U	60.3796
TP23662	2U	61.1179
TP18565	2U	61.1179
TP34661	2U	61.1179
TP39881	2U	61.1179
TP23578	2U	61.1179
TP12043	2U	61.1179
TP35045	2U	62.5949
TP43698	2U	62.9304
TP20866	2U	62.9304
TP9838	2U	62.9304
TP7388	2U	64.0044
TP31007	2U	64.34
TP25447	2U	64.6756
TP32294	2U	64.6756
TP17503	2U	66.0853
TP14375	2U	67.4951
TP30228	2U	68.502
TP22284	2U	69.1731
TP26460	2U	70.9188
TP18602	2U	71.2544
TP8636	2U	74.3456
TP10318	2U	74.6812
TP30418	2U	75.4195
TP18171	2U	75.4195
TP14531	2U	75.4195
TP42612	2U	78.3086
TP33780	2U	78.3086
TP27197	2U	79.9871
TP24045	2U	80.9939
TP32284	2U	80.9939
TP44300	2U	81.6651
TP33886	2U	86.0386
TP4882	2U	86.7098
TP40070	2U	87.0454
TP39549	2U	87.0454
TP25830	2U	87.7166
TP9779	2U	94.747
TP11570	2U	96.1567
TP37258	2U	99.1249
TP12420	2U	100.467
TP14839	2U	100.467
TP18034	2U	100.803
TP33696	2U	101.541
TP38532	2U	102.28
TP35357	2U	102.615
TP41232	2U	102.951
TP46046	2U	102.951
TP32254	2U	103.622
TP17458	2U	103.622
TP20220	2U	103.622
TP5409	2U	103.622
TP40763	2U	103.622
TP37056	2U	103.958
TP2131	2U	104.629
TP36793	2U	104.629
TP30637	2U	104.964
TP45163	2U	104.964
TP39268	2U	105.971
TP5795	2U	106.307
TP35720	2U	107.381
TP40766	2U	107.381
TP21351	2U	107.716
TP24710	2U	108.723
TP26411	2U	114.249
TP1654	2U	119.096
TP3319	2U	119.767
TP22314	2U	120.103
TP18184	2U	120.841
TP35369	2U	120.841
TP3870	2U	121.177
TP21486	2U	121.848
TP40205	2U	121.848
TP44258	2U	122.184
TP32353	2U	122.519
TP21011	2U	124.149
TP2684	2U	126.845
TP18725	2U	127.658
TP35444	2U	128.396
TP44019	2U	128.396
TP14020	2U	128.396
TP32602	2U	129.134
TP23914	2U	129.806
TP2550	3U	0
TP39569	3U	5.05067
TP13664	3U	8.638
TP35987	3U	11.4598
TP4445	3U	15.3603
TP3446	3U	15.3603
TP42981	3U	16.0315
TP30435	3U	19.2574
TP28703	3U	21.0703
TP21937	3U	22.5472
TP40356	3U	23.6212
TP43367	3U	24.3595
TP44670	3U	24.3595
TP243	3U	24.3595
TP19504	3U	24.3595
TP11719	3U	24.3595
TP38860	3U	24.6951
TP11981	3U	27.2477
TP3282	3U	30.8782
TP37040	3U	33.7
TP2971	3U	33.7
TP23467	3U	34.0355
TP12309	3U	34.4382
TP29559	3U	35.1765
TP6416	3U	35.5121
TP37004	3U	35.5121
TP33324	3U	35.5121
TP38077	3U	35.5121
TP9980	3U	35.5121
TP19568	3U	35.8477
TP3278	3U	35.8477
TP36639	3U	35.8477
TP25084	3U	35.8477
TP18036	3U	35.8477
TP10678	3U	36.1833
TP20503	3U	36.1833
TP5864	3U	36.1833
TP42116	3U	36.1833
TP18495	3U	36.1833
TP32109	3U	36.5188
TP10032	3U	36.5188
TP3027	3U	36.5188
TP6966	3U	36.5188
TP32186	3U	36.5188
TP4857	3U	36.9215
TP21958	3U	36.9215
TP33544	3U	38.0627
TP4720	3U	38.0627
TP31415	3U	38.801
TP18086	3U	40.5467
TP30183	3U	40.8822
TP3736	3U	41.2178
TP3255	3U	41.5534
TP5388	3U	41.889
TP23451	3U	42.2245
TP39263	3U	42.8957
TP922	3U	42.8957
TP13092	3U	43.2313
TP33295	3U	43.2313
TP43604	3U	44.2381
TP5767	3U	44.9093
TP35948	3U	45.6476
TP4307	3U	46.3859
TP31164	3U	46.3859
TP33799	3U	47.0571
TP13401	3U	48.8028
TP39387	3U	49.1384
TP7472	3U	49.474
TP4808	3U	49.474
TP32252	3U	49.8766
TP5765	3U	49.8766
TP12824	3U	51.4208
TP20213	3U	51.7563
TP18246	3U	52.0919
TP35516	3U	52.0919
TP13927	3U	52.0919
TP34421	3U	52.0919
TP3571	3U	52.0919
TP24110	3U	52.0919
TP14381	3U	52.0919
TP30095	3U	52.0919
TP30778	3U	52.4275
TP561	3U	53.1658
TP21065	3U	53.9041
TP26490	3U	54.5753
TP8720	3U	54.9109
TP9669	3U	57.6653
TP33617	3U	58.0009
TP26327	3U	58.0009
TP18591	3U	59.3435
TP38950	3U	60.0818
TP40599	3U	60.0818
TP19592	3U	60.0818
TP30817	3U	60.0818
TP18350	3U	60.0818
TP6525	3U	60.0818
TP21814	3U	60.0818
TP44920	3U	60.0818
TP27293	3U	60.0818
TP18481	3U	60.0818
TP13169	3U	60.0818
TP32954	3U	60.4174
TP31977	3U	61.4242
TP24153	3U	61.4242
TP20088	3U	61.4242
TP5698	3U	61.7598
TP25722	3U	63.8415
TP33730	3U	63.8415
TP42654	3U	63.8415
TP22271	3U	64.8484
TP32865	3U	66.2582
TP4355	3U	66.9293
TP21640	3U	66.9293
TP27599	3U	68.3391
TP23478	3U	68.3391
TP31798	3U	68.6747
TP39218	3U	69.0103
TP3392	3U	69.6814
TP15986	3U	70.017
TP7943	3U	70.7553
TP39626	3U	70.7553
TP5069	3U	71.4936
TP39212	3U	71.4936
TP27773	3U	71.4936
TP13486	3U	72.2319
TP13438	3U	72.9031
TP34258	3U	74.9849
TP18742	3U	74.9849
TP30703	3U	75.3204
TP18595	3U	75.3204
TP1597	3U	75.656
TP9994	3U	76.3272
TP30238	3U	76.3272
TP29976	3U	76.6628
TP22515	3U	76.6628
TP42955	3U	76.9984
TP42074	3U	77.3339
TP33756	3U	81.2344
TP18618	3U	81.7088
TP24506	3U	83.0514
TP8727	3U	83.7226
TP5712	3U	84.3938
TP30728	3U	86.4755
TP40926	3U	87.4824
TP31710	3U	89.5641
TP5442	3U	89.5641
TP1134	3U	89.5641
TP21788	3U	89.5641
TP32690	3U	91.3098
TP35043	3U	92.3166
TP27588	3U	93.3235
TP28327	3U	94.3975
TP43892	3U	94.3975
TP27943	3U	97.0846
TP26301	3U	97.4202
TP37444	3U	98.427
TP31245	3U	98.427
TP29945	3U	98.427
TP33055	3U	99.8368
TP25056	3U	99.8368
TP11708	3U	101.179
TP22240	3U	102.925
TP29095	3U	102.925
TP41093	3U	102.925
TP11763	3U	104.671
TP39184	3U	105.342
TP4959	3U	105.342
TP26781	3U	107.088
TP4405	3U	107.423
TP4278	3U	107.423
TP6418	3U	107.423
TP30928	3U	107.759
TP23351	3U	108.833
TP15623	3U	109.974
TP6830	3U	111.048
TP1529	3U	111.048
TP41821	3U	111.048
TP148	3U	111.048
TP13746	3U	111.786
TP26124	3U	112.122
TP37542	3U	112.122
TP45243	3U	112.122
TP32018	3U	114.271
TP24748	3U	114.271
TP7785	3U	115.493
TP13128	3U	116.231
TP717	3U	119.323
TP4194	3U	120.531
TP24486	3U	121.672
TP3469	3U	121.672
TP21569	3U	122.41
TP37436	3U	122.746
TP965	3U	122.746
TP39602	3U	122.746
TP19083	3U	122.746
TP16874	3U	122.746
TP35675	3U	122.746
TP28127	3U	123.082
TP7226	3U	123.82
TP25821	3U	124.894
TP16472	3U	124.894
TP46128	3U	126.304
TP5964	3U	127.713
TP23280	3U	129.795
TP13666	3U	130.802
TP4492	3U	130.802
TP16819	3U	131.138
TP31006	3U	131.138
TP4546	3U	132.279
TP27033	3U	133.606
TP31070	3U	134.632
TP2925	3U	135.951
TP18988	4U	0
TP42514	4U	3.15856
TP38400	4U	3.49413
TP14166	4U	3.82971
TP5008	4U	4.83656
TP22238	4U	6.17916
TP8685	4U	7.18601
TP3012	4U	7.85719
TP5999	4U	8.19276
TP1273	4U	9.33847
TP36020	4U	9.67405
TP24658	4U	10.3452
TP4651	4U	10.3452
TP28234	4U	10.3452
TP18475	4U	10.6808
TP12602	4U	11.352
TP26623	4U	15.2525
TP41057	4U	15.5881
TP22308	4U	20.3677
TP40304	4U	22.9202
TP35158	4U	22.9202
TP14905	4U	24.33
TP44029	4U	24.6656
TP43303	4U	25.8184
TP3218	4U	29.7864
TP42321	4U	29.7864
TP40735	4U	33.4961
TP28337	4U	36.9917
TP18223	4U	36.9917
TP23501	4U	37.3273
TP21842	4U	37.6629
TP23039	4U	40.4174
TP41495	4U	40.7529
TP29786	4U	41.7598
TP25024	4U	42.0954
TP1640	4U	42.0954
TP16642	4U	42.0954
TP6833	4U	42.0954
TP4876	4U	42.0954
TP43571	4U	42.4309
TP41736	4U	42.4309
TP18600	4U	42.7665
TP42937	4U	42.7665
TP33798	4U	42.7665
TP38148	4U	43.5048
TP45162	4U	43.5048
TP31999	4U	43.5048
TP1359	4U	43.5048
TP1428	4U	44.176
TP30467	4U	44.176
TP9174	4U	44.176
TP1513	4U	44.176
TP38417	4U	44.5116
TP31258	4U	45.1828
TP3389	4U	45.8539
TP13685	4U	45.8539
TP28325	4U	45.8539
TP26737	4U	45.8539
TP27230	4U	47.1965
TP30130	4U	48.2705
TP13651	4U	48.6061
TP19982	4U	48.6061
TP38289	4U	49.9487
TP43862	4U	54.187
TP22040	4U	56.9415
TP26729	4U	58.0155
TP2036	4U	59.8956
TP20853	4U	59.8956
TP36147	4U	60.2311
TP16215	4U	60.9023
TP12438	4U	61.2379
TP18840	4U	62.9164
TP3375	4U	63.5875
TP27321	4U	63.5875
TP42839	4U	64.4095
TP27273	4U	64.4095
TP31307	4U	64.7451
TP168	4U	65.8191
TP13141	4U	65.8191
TP22520	4U	66.1547
TP23613	4U	66.4902
TP2489	4U	68.572
TP37566	4U	69.2432
TP5613	4U	69.5787
TP40756	4U	70.2499
TP37352	4U	71.5925
TP25965	4U	71.5925
TP25026	4U	71.9281
TP14500	4U	71.9281
TP3960	4U	72.5993
TP45836	4U	72.9349
TP18217	4U	73.606
TP22235	4U	74.2772
TP32730	4U	74.2772
TP46090	4U	77.5799
TP5704	4U	79.803
TP19287	4U	82.8454
TP74	4U	91.4819
TP37829	4U	95.5292
TP22029	4U	95.5292
TP21688	4U	95.8648
TP14177	4U	96.2004
TP18703	4U	96.8716
TP16598	4U	97.2071
TP2888	4U	99.2889
TP8090	4U	99.2889
TP30816	4U	100.296
TP43956	4U	101.638
TP40806	4U	102.645
TP31228	4U	102.645
TP43851	4U	103.316
TP18420	4U	103.652
TP706	4U	104.323
TP16405	4U	106.002
TP11932	4U	106.673
TP13320	4U	107.008
TP3521	4U	107.344
TP23830	4U	108.015
TP3409	4U	111.916
TP20864	4U	113.325
TP3697	4U	114.802
TP28098	4U	116.548
TP6193	4U	117.622
TP35399	4U	119.032
TP17779	4U	119.703
TP7006	4U	121.449
TP18471	4U	122.12
TP45723	4U	122.858
TP27957	4U	123.932
TP30149	4U	125.095
TP4570	4U	126.169
TP4569	4U	126.169
TP5805	4U	129.806
TP35281	4U	130.477
TP38065	4U	130.477
TP26255	4U	130.813
TP32594	4U	132.29
TP28945	4U	132.626
TP3244	4U	133.364
TP44849	4U	133.364
TP37461	4U	133.364
TP35826	4U	133.364
TP25891	4U	134.774
TP32022	4U	135.512
TP20425	4U	136.922
TP36486	4U	137.257
TP23259	4U	137.593
TP22167	4U	139.003
TP18415	4U	139.338
TP3854	4U	139.338
TP18416	4U	139.338
TP42683	4U	140.077
TP25349	4U	141.151
TP37134	4U	142.493
TP13116	4U	143.164
TP21078	4U	143.835
TP743	4U	144.842
TP39455	4U	146.252
TP12251	4U	147.595
TP16005	4U	147.595
TP14514	4U	149.273
TP3383	5U	0
TP10195	5U	0.671181
TP30661	5U	1.34236
TP5778	5U	3.63274
TP10212	5U	3.96831
TP30534	5U	3.96831
TP22960	5U	3.96831
TP4322	5U	9.56663
TP9916	5U	11.595
TP17343	5U	16.8561
TP7495	5U	22.7797
TP18981	5U	29.9414
TP1453	5U	31.0848
TP2834	5U	33.5028
TP4426	5U	34.174
TP15652	5U	34.8452
TP25506	5U	37.667
TP2244	5U	37.667
TP39916	5U	37.667
TP15500	5U	39.0767
TP23942	5U	39.0767
TP1773	5U	39.815
TP5967	5U	40.5533
TP12037	5U	40.5533
TP40558	5U	41.2916
TP895	5U	41.9628
TP26867	5U	43.0368
TP42390	5U	43.0368
TP37238	5U	43.0368
TP11508	5U	44.5138
TP5178	5U	44.5138
TP13102	5U	44.5138
TP29076	5U	46.999
TP22010	5U	47.3346
TP23946	5U	47.7373
TP12556	5U	48.0729
TP11086	5U	48.0729
TP24821	5U	48.0729
TP26579	5U	48.0729
TP28187	5U	49.1469
TP16796	5U	49.4824
TP18169	5U	50.1536
TP43627	5U	51.2276
TP29129	5U	52.3016
TP22207	5U	52.3016
TP29779	5U	52.9728
TP31687	5U	52.9728
TP2915	5U	52.9728
TP13819	5U	52.9728
TP22647	5U	52.9728
TP11823	5U	52.9728
TP4025	5U	52.9728
TP36089	5U	52.9728
TP2444	5U	52.9728
TP6690	5U	52.9728
TP371	5U	52.9728
TP6003	5U	53.3084
TP7851	5U	53.9795
TP14978	5U	53.9795
TP39806	5U	53.9795
TP13395	5U	54.3151
TP37297	5U	54.3151
TP45823	5U	54.3151
TP1733	5U	54.3151
TP16643	5U	54.3151
TP39360	5U	54.3151
TP32040	5U	54.3151
TP45004	5U	54.6507
TP10237	5U	54.6507
TP4730	5U	54.9863
TP35086	5U	58.0101
TP25078	5U	58.6813
TP39086	5U	60.0239
TP22529	5U	60.3594
TP1561	5U	61.7692
TP37418	5U	62.1048
TP43564	5U	62.4404
TP19730	5U	62.4404
TP6395	5U	63.2527
TP36688	5U	64.9984
TP8660	5U	65.3339
TP17849	5U	65.6695
TP46232	5U	66.4078
TP12158	5U	68.7586
TP39120	5U	70.7058
TP20095	5U	71.0414
TP12743	5U	71.377
TP23945	5U	72.0482
TP33118	5U	73.7939
TP2492	5U	75.5395
TP6302	5U	78.294
TP28646	5U	78.9652
TP4317	5U	78.9652
TP25479	5U	78.9652
TP36164	5U	79.7035
TP27428	5U	81.1804
TP42721	5U	81.8516
TP35298	5U	82.1872
TP12666	5U	82.1872
TP33990	5U	82.1872
TP26326	5U	82.5228
TP28616	5U	82.5228
TP20233	5U	82.8583
TP44928	5U	82.8583
TP8466	5U	83.1939
TP1659	5U	84.9396
TP24412	5U	86.7547
TP11653	5U	88.5004
TP9917	5U	88.836
TP40095	5U	90.5816
TP16419	5U	91.7274
TP13572	5U	92.3985
TP25385	5U	94.1442
TP1380	5U	94.1442
TP20070	5U	95.1511
TP30863	5U	97.3
TP26588	5U	97.3
TP39470	5U	97.3
TP43138	5U	97.6356
TP6069	5U	98.3068
TP12321	5U	98.978
TP11729	5U	101.06
TP28109	5U	101.395
TP20783	5U	102.066
TP2264	5U	102.402
TP5677	5U	103.14
TP7986	5U	103.879
TP24749	5U	104.214
TP32107	5U	104.55
TP40701	5U	105.027
TP26482	5U	106.436
TP30634	5U	106.436
TP32654	5U	107.107
TP1070	5U	108.517
TP26674	5U	109.256
TP11125	5U	109.658
TP41246	5U	110.329
TP28348	5U	110.329
TP14795	5U	113.151
TP44792	5U	113.487
TP4997	5U	113.822
TP5364	5U	114.494
TP6711	5U	114.829
TP43184	5U	114.829
TP36988	5U	115.165
TP14159	5U	115.836
TP39800	5U	115.836
TP46150	5U	118.994
TP39296	5U	119.666
TP20947	5U	122.084
TP792	5U	122.419
TP21035	5U	123.493
TP26375	5U	124.231
TP2194	5U	124.97
TP16126	5U	125.641
TP18426	5U	125.977
TP22189	5U	125.977
TP27382	5U	125.977
TP26401	5U	126.648
TP39173	5U	127.722
TP41256	5U	127.722
TP44626	5U	127.722
TP39700	5U	127.722
TP40508	5U	129.871
TP5391	5U	130.206
TP10642	5U	131.213
TP22431	5U	131.549
TP1860	5U	131.549
TP7492	5U	131.549
TP11426	5U	132.69
TP12529	5U	133.093
TP28594	5U	133.428
TP35836	5U	133.428
TP9648	5U	133.764
TP14331	5U	134.435
TP4444	5U	134.77
TP43798	5U	135.777
TP6284	5U	137.187
TP21527	5U	138.597
TP38721	5U	138.597
TP14053	5U	138.597
TP20203	5U	138.597
TP10756	5U	141.419
TP3338	5U	141.419
TP6453	5U	141.419
TP5098	5U	141.419
TP26980	5U	141.754
TP32354	5U	142.09
TP29908	5U	142.09
TP7735	5U	143.097
TP3827	5U	143.097
TP38379	5U	143.097
TP3189	5U	143.768
TP39333	5U	144.103
TP33093	5U	145.513
TP15807	5U	146.923
TP30960	5U	147.93
TP36397	5U	148.668
TP45046	5U	149.004
TP46155	5U	150.749
TP39790	5U	151.488
TP3964	5U	153.771
TP29438	5U	154.107
TP18484	5U	154.107
TP23870	5U	154.442
TP44715	5U	155.785
TP35868	5U	156.792
TP14291	5U	157.127
TP11092	5U	157.463
TP16841	5U	159.208
TP40913	5U	159.208
TP1855	5U	159.88
TP33112	5U	160.215
TP30792	5U	161.961
TP39595	5U	162.297
TP17151	5U	162.297
TP5880	5U	162.632
TP18729	5U	164.445
TP39795	5U	164.445
TP5133	5U	164.445
TP1644	5U	165.116
TP13103	5U	165.116
TP9738	5U	166.123
TP9567	5U	166.794
TP38637	5U	167.13
TP41647	5U	167.13
TP17277	5U	168.54
TP43082	5U	168.875
TP7657	5U	171.899
TP38772	5U	171.899
TP40730	5U	172.234
TP43759	5U	173.376
TP23035	5U	173.376
TP35956	5U	173.376
TP33688	5U	173.376
TP8481	5U	173.376
TP19665	5U	173.376
TP24232	5U	173.376
TP26853	5U	173.376
TP19600	5U	173.778
TP12565	5U	173.778
TP16459	5U	174.919
TP35962	5U	175.255
TP43325	5U	176.262
TP2549	5U	177.336
TP22000	5U	178.41
TP7176	5U	179.081
TP19180	5U	179.417
TP40615	5U	179.417
TP7922	5U	179.417
TP32568	5U	180.423
TP21537	5U	181.095
TP22705	6U	0
TP21866	6U	1.55338
TP20086	6U	3.26999
TP35897	6U	6.96501
TP11529	6U	6.96501
TP34725	6U	7.30059
TP18573	6U	7.77966
TP22097	6U	8.66136
TP13648	6U	10.4765
TP29152	6U	17.0483
TP43018	6U	22.0609
TP29084	6U	23.9502
TP25648	6U	23.9502
TP12690	6U	23.9502
TP26046	6U	24.9571
TP41684	6U	27.0388
TP11277	6U	28.5203
TP40678	6U	28.5203
TP26018	6U	29.1915
TP44885	6U	29.8627
TP36315	6U	30.8695
TP39862	6U	32.6824
TP45855	6U	33.7564
TP21606	6U	34.092
TP5802	6U	35.5689
TP15856	6U	35.9045
TP7427	6U	35.9045
TP45529	6U	42.113
TP6300	6U	44.5982
TP37855	6U	44.5982
TP11741	6U	44.5982
TP33386	6U	45.0009
TP39490	6U	46.545
TP3852	6U	46.545
TP5946	6U	46.545
TP41718	6U	47.2833
TP45871	6U	47.686
TP24036	6U	47.686
TP25340	6U	47.686
TP12185	6U	47.686
TP7845	6U	48.3572
TP31629	6U	49.3641
TP2173	6U	49.3641
TP9715	6U	49.3641
TP9889	6U	49.3641
TP1180	6U	49.3641
TP3841	6U	49.3641
TP11937	6U	49.3641
TP36847	6U	50.438
TP21520	6U	50.438
TP12969	6U	51.512
TP11292	6U	51.8476
TP24215	6U	52.8545
TP32131	6U	52.8545
TP6246	6U	53.5256
TP46106	6U	53.8612
TP13647	6U	54.1968
TP35014	6U	54.868
TP12404	6U	54.868
TP6333	6U	54.868
TP15516	6U	54.868
TP11967	6U	55.5392
TP991	6U	55.5392
TP4207	6U	55.5392
TP32013	6U	55.5392
TP7529	6U	56.2103
TP18767	6U	56.2103
TP27478	6U	56.2103
TP9718	6U	56.2103
TP3678	6U	56.2103
TP2345	6U	56.2103
TP14602	6U	56.2103
TP2056	6U	56.5459
TP1332	6U	56.5459
TP18142	6U	57.2171
TP41177	6U	57.2171
TP9257	6U	57.2171
TP32918	6U	57.2171
TP46058	6U	57.2171
TP43283	6U	57.2171
TP42126	6U	57.2171
TP42960	6U	57.5527
TP3759	6U	57.5527
TP2657	6U	57.5527
TP10219	6U	57.5527
TP10588	6U	57.5527
TP17056	6U	57.5527
TP42565	6U	57.5527
TP12104	6U	57.5527
TP34281	6U	57.5527
TP17886	6U	57.5527
TP25939	6U	57.5527
TP3336	6U	57.5527
TP38777	6U	57.5527
TP8299	6U	57.5527
TP24754	6U	57.5527
TP30881	6U	57.5527
TP17171	6U	57.5527
TP41830	6U	57.5527
TP5791	6U	57.5527
TP31703	6U	57.5527
TP36661	6U	57.5527
TP10856	6U	57.5527
TP36745	6U	57.5527
TP14861	6U	57.5527
TP16213	6U	57.5527
TP10080	6U	57.5527
TP42685	6U	57.5527
TP29413	6U	57.5527
TP37050	6U	57.5527
TP6325	6U	57.8882
TP20829	6U	57.8882
TP9955	6U	57.8882
TP14252	6U	57.8882
TP4502	6U	57.8882
TP28372	6U	57.8882
TP34310	6U	57.8882
TP20263	6U	57.8882
TP14745	6U	57.8882
TP41990	6U	57.8882
TP29718	6U	57.8882
TP5093	6U	58.2238
TP19666	6U	58.5594
TP94	6U	58.5594
TP3858	6U	58.895
TP41442	6U	58.895
TP22080	6U	58.895
TP18163	6U	60.2376
TP27102	6U	60.5732
TP44296	6U	62.5877
TP37233	6U	62.5877
TP9328	6U	62.5877
TP30963	6U	62.5877
TP17478	6U	62.9232
TP36225	6U	63.9301
TP19943	6U	65.6086
TP28393	6U	69.4416
TP44565	6U	69.7771
TP18646	6U	70.4483
TP39861	6U	71.5223
TP38364	6U	74.7483
TP20178	6U	75.0838
TP19010	6U	75.4194
TP3864	6U	75.4194
TP19196	6U	75.755
TP21089	6U	77.8367
TP33813	6U	78.9779
TP26050	6U	80.119
TP26982	6U	80.4546
TP1151	6U	80.4546
TP15690	6U	81.4614
TP42219	6U	81.4614
TP7871	6U	81.8039
TP28453	6U	82.945
TP12200	6U	85.9688
TP35354	6U	85.9688
TP39932	6U	85.9688
TP31062	6U	86.3044
TP11340	6U	87.7142
TP14203	6U	88.0498
TP1451	6U	88.7209
TP25853	6U	90.1307
TP10596	6U	90.1307
TP15481	6U	90.4663
TP18878	6U	91.5403
TP41277	6U	92.2115
TP1038	6U	94.3604
TP5399	6U	94.696
TP36687	6U	94.696
TP41435	6U	96.7777
TP13183	6U	99.9363
TP14578	6U	101.01
TP36713	6U	101.346
TP41157	6U	102.017
TP42513	6U	102.353
TP31353	6U	103.83
TP18138	6U	103.83
TP27098	6U	105.911
TP13198	6U	106.247
TP16377	6U	107.657
TP26526	6U	110.478
TP33972	6U	114.582
TP6234	6U	114.582
TP43748	6U	114.917
TP31872	6U	115.924
TP38091	6U	117.67
TP28272	6U	118.408
TP3833	6U	119.146
TP20733	7U	0
TP21682	7U	3.36325
TP20107	7U	4.50439
TP12532	7U	5.2427
TP35063	7U	6.79848
TP30197	7U	7.13405
TP3730	7U	7.13405
TP21544	7U	8.54382
TP5744	7U	9.215
TP30976	7U	10.289
TP22660	7U	11.6988
TP10476	7U	12.7056
TP31965	7U	13.0412
TP25672	7U	13.7124
TP30834	7U	14.3835
TP18901	7U	14.3835
TP40107	7U	14.3835
TP12003	7U	14.3835
TP44228	7U	17.9466
TP24064	7U	21.5097
TP34096	7U	21.5097
TP2756	7U	21.5097
TP41343	7U	21.5097
TP27228	7U	21.5097
TP31907	7U	21.5097
TP238	7U	21.5097
TP32450	7U	21.5097
TP31240	7U	22.1809
TP8954	7U	22.1809
TP31093	7U	22.1809
TP1334	7U	22.1809
TP15067	7U	22.1809
TP39914	7U	22.1809
TP38603	7U	22.1809
TP37946	7U	22.1809
TP28972	7U	22.1809
TP28209	7U	22.1809
TP45056	7U	22.1809
TP17957	7U	22.1809
TP8759	7U	22.1809
TP9935	7U	22.5164
TP17367	7U	22.5164
TP13966	7U	22.852
TP14209	7U	22.852
TP41112	7U	22.852
TP33950	7U	22.852
TP18063	7U	22.852
TP20275	7U	22.852
TP39722	7U	22.852
TP24637	7U	22.852
TP19748	7U	22.852
TP44879	7U	23.1876
TP16392	7U	23.8588
TP36792	7U	23.8588
TP12385	7U	23.8588
TP2472	7U	23.8588
TP27594	7U	23.8588
TP9938	7U	23.8588
TP9734	7U	23.8588
TP45798	7U	23.8588
TP216	7U	23.8588
TP36374	7U	23.8588
TP29448	7U	23.8588
TP31856	7U	23.8588
TP26057	7U	23.8588
TP38902	7U	23.8588
TP21804	7U	23.8588
TP32587	7U	23.8588
TP28930	7U	23.8588
TP20384	7U	23.8588
TP25410	7U	23.8588
TP37020	7U	23.8588
TP23585	7U	23.8588
TP20061	7U	23.8588
TP29794	7U	23.8588
TP29419	7U	23.8588
TP16209	7U	24.1943
TP1152	7U	24.1943
TP37292	7U	26.2761
TP14971	7U	26.2761
TP23660	7U	26.2761
TP26550	7U	26.6117
TP12539	7U	27.2828
TP12451	7U	27.2828
TP7233	7U	27.2828
TP27110	7U	28.3568
TP8946	7U	28.6924
TP11864	7U	30.7741
TP45440	7U	30.7741
TP27965	7U	31.4453
TP38457	7U	31.4453
TP22268	7U	31.4453
TP27095	7U	31.4453
TP32575	7U	34.0002
TP3454	7U	34.3357
TP8971	7U	35.0069
TP16007	7U	35.3425
TP6949	7U	36.0808
TP11392	7U	37.1548
TP16400	7U	37.8931
TP31348	7U	38.2287
TP37193	7U	40.1087
TP21050	7U	41.2499
TP31174	7U	41.2499
TP26407	7U	41.2499
TP32538	7U	41.5855
TP36528	7U	43.8689
TP36116	7U	46.0851
TP12732	7U	48.3014
TP10422	7U	50.1814
TP6251	7U	50.517
TP7223	7U	51.1882
TP44788	7U	51.1882
TP13877	7U	51.1882
TP30934	7U	51.5238
TP37725	7U	53.2694
TP33638	7U	54.0078
TP37366	7U	54.7461
TP2167	7U	55.8201
TP29683	7U	57.969
TP28836	7U	58.779
TP21806	7U	59.1146
TP13931	7U	60.1215
TP16395	7U	60.1215
TP32115	7U	60.7926
TP29572	7U	61.4638
TP4202	7U	61.4638
TP33013	7U	61.7994
TP31079	7U	61.7994
TP4330	7U	61.7994
TP4724	7U	61.7994
TP28613	7U	62.135
TP1530	7U	63.9478
TP34438	7U	63.9478
TP17091	7U	63.9478
TP32447	7U	64.2834
TP39034	7U	64.619
TP33262	7U	64.9546
TP22568	7U	65.9614
TP44916	7U	65.9614
TP25689	7U	67.0354
TP9338	7U	67.0354
TP5229	7U	68.1094
TP6492	7U	68.1094
TP25504	7U	68.1094
TP26953	7U	68.7806
TP16748	7U	68.7806
TP16300	7U	69.1162
TP11475	7U	69.1162
TP22573	7U	69.4517
TP30910	7U	69.4517
TP14948	7U	69.7873
TP38649	7U	69.7873
TP21248	7U	69.7873
TP35954	7U	69.7873
TP6394	7U	69.7873
TP31869	7U	69.7873
TP6379	7U	69.7873
TP5317	7U	70.1229
TP15276	7U	70.1229
TP33221	7U	70.5256
TP12638	7U	72.809
TP45227	7U	72.809
TP23892	7U	72.809
TP26237	7U	72.809
TP25451	7U	73.1446
TP32099	7U	73.1446
TP6398	7U	73.1446
TP42982	7U	73.1446
TP10250	7U	73.1446
TP21824	7U	73.8158
TP15953	7U	73.8158
TP1609	7U	73.8158
TP4072	7U	73.8158
TP4739	7U	73.8158
TP33702	7U	73.8158
TP28891	7U	73.8158
TP34879	7U	75.2256
TP44871	7U	75.8967
TP10649	7U	76.2323
TP4439	7U	76.2323
TP29986	7U	76.2323
TP45241	7U	77.6421
TP34857	7U	78.3804
TP12480	7U	78.3804
TP25145	7U	78.3804
TP23289	7U	78.716
TP7677	7U	79.0516
TP39327	7U	79.0516
TP19150	7U	79.0516
TP43265	7U	79.0516
TP42932	7U	79.3871
TP117	7U	79.7227
TP43601	7U	80.0583
TP37801	7U	80.0583
TP11303	7U	80.0583
TP19546	7U	80.0583
TP28242	7U	80.7966
TP25138	7U	80.7966
TP38626	7U	82.2064
TP20219	7U	84.6916
TP5303	7U	85.7656
TP27504	7U	87.2426
TP19723	7U	87.2426
TP37818	7U	88.3837
TP43443	7U	88.3837
TP36196	7U	88.7864
TP43459	7U	89.122
TP5366	7U	89.4575
TP41971	7U	89.4575
TP4517	7U	89.4575
TP12471	7U	89.4575
TP6029	7U	90.1958
TP9465	7U	90.1958
TP31417	7U	90.9342
TP2263	7U	92.0081
TP2092	7U	92.6793
TP41171	7U	93.0149
TP1280	7U	93.3505
TP29785	7U	93.6861
TP45380	7U	93.6861
TP37431	7U	95.163
TP21262	7U	95.163
TP1741	7U	95.4986
TP12305	7U	96.2369
TP32376	7U	96.5915
TP30266	7U	98.6732
TP30428	7U	100.016
TP35047	7U	100.351
TP20010	7U	101.023
TP31479	7U	101.358
TP412	7U	102.365
TP43199	7U	103.036
TP33489	7U	103.036
TP11441	7U	103.036
TP9453	7U	103.372
TP23033	7U	104.043
TP6013	7U	106.865
TP27097	7U	108.342
TP42465	7U	108.342
TP6523	7U	108.836
TP31051	7U	119.974
TP28959	7U	120.981
TP28149	7U	124.14
TP24573	7U	125.482
TP36856	7U	126.154
TP40743	7U	126.154
TP5939	7U	126.154
TP13844	7U	126.825
TP35816	7U	127.832
TP34130	7U	128.838
TP29444	7U	129.51
TP21530	7U	130.181
TP44531	7U	130.516
TP6044	7U	131.188
TP39792	7U	131.523
TP42281	7U	133.739
TP12018	7U	137.572
TP3224	7U	137.572
TP21447	7U	137.908
TP32707	7U	139.654
TP18485	7U	139.654
TP29732	7U	139.989
TP45565	7U	139.989
TP37687	7U	140.66
TP3672	7U	140.996
TP86	7U	142.809
TP8943	7U	143.144
TP38336	7U	143.883
TP35392	7U	144.218
TP20530	7U	146.031
TP16424	7U	147.038
TP42393	7U	147.038
TP14670	7U	147.038
TP25933	7U	148.045
TP30872	7U	148.716
TP17591	7U	149.052
TP3200	7U	150.126
TP25080	7U	150.126
TP34863	7U	151.2
TP2316	7U	151.2
TP43134	7U	151.2
TP9472	7U	151.871
TP7129	7U	153.281
TP38113	7U	153.281
TP11045	7U	153.952
TP33670	7U	154.287
TP26734	7U	154.287
TP10434	7U	154.623
TP7089	7U	154.623
TP28697	7U	154.623
TP34193	7U	154.623
TP38767	7U	154.623
TP34067	7U	154.623
TP40283	7U	154.623
TP6943	7U	154.623
TP32220	7U	154.623
TP34889	7U	156.772
TP4691	7U	158.921
TP28585	7U	158.921
TP15036	7U	159.659
TP18556	7U	160.397
TP2575	7U	161.874
TP30607	7U	162.948
TP21859	7U	162.948
TP11877	7U	162.948
TP38756	7U	162.948
TP33918	7U	162.948
TP7646	7U	163.284
TP30793	7U	164.022
TP29668	7U	166.911

## Sheet: Aeupop1_Antmap
Linkage maps for Aeupop1 using Antmp
Markers	Chr	cM
TP9663	1U	0
TP37062	1U	3.66
TP3802	1U	4.75
TP31757	1U	5.11
TP27181	1U	5.11
TP25789	1U	5.48
TP12036	1U	6.58
TP42419	1U	9.53
TP36611	1U	9.89
TP8670	1U	10.26
TP1133	1U	11.03
TP36346	1U	11.4
TP34677	1U	11.77
TP20527	1U	11.77
TP32293	1U	14.02
TP26942	1U	14.75
TP19452	1U	15.49
TP5375	1U	17.79
TP45301	1U	18.94
TP43513	1U	18.94
TP39908	1U	18.94
TP28577	1U	18.94
TP14616	1U	18.94
TP31732	1U	19.31
TP15762	1U	20.06
TP30453	1U	22.33
TP1876	1U	25.39
TP3778	1U	25.77
TP3752	1U	25.77
TP40295	1U	26.14
TP12804	1U	29.83
TP35525	1U	30.21
TP42411	1U	73.79
TP5235	1U	76.37
TP43414	1U	77.46
TP41753	1U	77.84
TP32272	1U	77.84
TP17946	1U	77.84
TP14185	1U	80.91
TP6355	1U	83.49
TP5919	1U	83.49
TP38454	1U	83.49
TP36886	1U	83.49
TP18447	1U	83.49
TP1385	1U	83.49
TP45662	2U	0
TP1752	2U	3.06
TP3062	2U	3.06
TP24398	2U	3.06
TP19904	2U	3.06
TP32845	2U	3.43
TP13332	2U	4.18
TP38843	2U	5.71
TP39900	2U	6.83
TP11126	2U	6.83
TP44904	2U	7.58
TP11650	2U	7.58
TP18031	2U	8.67
TP27621	2U	9.76
TP7707	2U	10.12
TP3096	2U	10.48
TP40278	2U	10.48
TP44828	2U	11.61
TP31205	2U	11.61
TP722	2U	11.97
TP1229	2U	12.33
TP7781	2U	12.33
TP12279	2U	12.33
TP28799	2U	12.7
TP45473	2U	13.07
TP26902	2U	13.07
TP5087	2U	13.8
TP36854	2U	13.8
TP25456	2U	14.16
TP13818	2U	14.16
TP17921	2U	14.52
TP42570	2U	17.47
TP8605	2U	17.47
TP42284	2U	18.23
TP5159	2U	18.23
TP12133	2U	18.23
TP5839	2U	18.63
TP1902	2U	19.01
TP42887	2U	19.37
TP15035	2U	19.37
TP8081	2U	19.37
TP2328	2U	20.96
TP17578	2U	21.72
TP42948	2U	23.91
TP31749	2U	24.64
TP882	2U	26.91
TP30372	2U	26.91
TP27187	2U	26.91
TP15964	2U	27.3
TP30158	2U	28.42
TP45686	2U	28.42
TP35585	2U	28.42
TP4646	2U	29.92
TP35076	2U	29.92
TP5960	2U	29.92
TP31492	2U	29.92
TP39357	2U	31.76
TP44908	2U	31.76
TP37894	2U	31.76
TP25441	2U	32.13
TP30456	2U	32.13
TP38720	2U	32.13
TP45136	2U	33.6
TP7641	2U	33.96
TP38960	2U	33.96
TP5362	2U	33.96
TP4361	2U	33.96
TP3417	2U	33.96
TP15103	2U	33.96
TP15817	2U	34.32
TP13145	2U	34.32
TP17450	2U	34.32
TP21020	2U	34.69
TP32032	2U	34.69
TP4578	2U	36.21
TP6605	2U	36.94
TP45991	2U	37.31
TP38193	2U	37.31
TP35497	2U	37.31
TP28488	2U	37.31
TP30112	2U	37.31
TP45776	2U	37.31
TP23910	2U	39.16
TP2625	2U	39.16
TP19378	2U	40.27
TP29759	2U	40.27
TP22729	2U	40.27
TP43057	2U	42.1
TP23584	2U	42.1
TP8589	2U	42.46
TP46233	2U	42.46
TP44922	2U	43.57
TP23043	2U	43.57
TP13018	2U	43.94
TP10680	2U	44.3
TP40429	2U	44.3
TP42715	2U	46.89
TP10202	2U	49.88
TP44890	2U	50.24
TP41561	2U	50.24
TP21827	2U	50.24
TP28171	2U	50.61
TP13071	2U	51.34
TP24004	2U	51.34
TP345	2U	51.34
TP971	2U	52.82
TP30264	2U	53.93
TP42042	2U	54.29
TP45288	2U	55.4
TP8024	2U	55.4
TP24217	2U	55.4
TP18076	2U	55.4
TP10199	2U	55.4
TP1953	2U	55.4
TP13976	2U	55.77
TP9862	2U	56.88
TP27945	2U	56.88
TP22634	2U	56.88
TP25819	2U	58.01
TP45703	2U	58.01
TP31295	2U	58.39
TP13047	2U	58.78
TP22159	2U	58.78
TP44255	2U	59.14
TP44256	2U	59.14
TP29389	2U	59.14
TP5700	2U	59.5
TP32257	2U	59.5
TP22089	2U	60.95
TP31695	2U	61.31
TP999	2U	61.31
TP21402	2U	61.31
TP41719	2U	61.31
TP21392	2U	62.06
TP29061	2U	63.16
TP44342	2U	63.52
TP38009	2U	63.89
TP6501	2U	63.89
TP7875	2U	63.89
TP42841	2U	63.89
TP7028	2U	64.61
TP34192	2U	64.98
TP36331	2U	65.36
TP2296	2U	65.36
TP5175	2U	65.36
TP38376	2U	65.36
TP20226	2U	65.36
TP43349	2U	65.72
TP43717	2U	65.72
TP6568	2U	65.72
TP36009	2U	65.72
TP489	2U	65.72
TP33492	2U	65.72
TP43125	2U	65.72
TP19066	2U	65.72
TP4144	2U	65.72
TP24138	2U	65.72
TP35470	2U	65.72
TP26541	2U	65.72
TP23913	2U	65.72
TP31786	2U	65.72
TP42904	2U	65.72
TP16348	2U	65.72
TP16009	2U	65.72
TP2094	2U	65.72
TP41513	2U	66.09
TP3120	2U	66.45
TP21434	2U	66.45
TP9895	2U	66.45
TP30859	2U	66.45
TP12177	2U	66.45
TP9671	2U	67.19
TP36453	2U	67.19
TP26071	2U	67.57
TP4147	2U	67.57
TP19831	2U	67.57
TP31045	2U	67.57
TP18974	2U	67.57
TP31496	2U	68.32
TP3608	2U	68.32
TP35889	2U	68.32
TP30947	2U	68.32
TP38362	2U	68.32
TP2246	2U	68.32
TP43412	2U	68.32
TP45366	2U	68.32
TP3739	2U	68.69
TP22424	2U	68.69
TP4849	2U	69.05
TP18121	2U	69.05
TP42737	2U	69.05
TP43698	2U	70.15
TP25477	2U	71.62
TP40098	2U	71.99
TP9793	2U	73.11
TP13016	2U	73.48
TP11542	2U	73.48
TP30228	2U	73.48
TP9315	2U	73.86
TP21472	2U	74.27
TP39766	2U	74.27
TP26460	2U	74.27
TP8388	2U	74.27
TP17116	2U	75
TP20997	2U	75
TP27519	2U	75.37
TP38249	2U	78
TP37555	2U	78.38
TP11101	2U	78.76
TP19169	2U	78.76
TP8687	2U	79.13
TP14531	2U	79.13
TP2381	2U	79.49
TP44067	2U	79.49
TP17463	2U	79.86
TP31787	2U	81.76
TP36190	2U	82.88
TP19699	2U	83.27
TP45923	2U	83.66
TP6082	2U	83.66
TP4558	2U	83.66
TP34301	2U	84.05
TP28218	2U	85.24
TP29611	2U	85.24
TP40115	2U	85.24
TP5701	2U	85.6
TP24305	2U	85.6
TP12709	2U	86.69
TP716	2U	87.41
TP3142	2U	89.24
TP37357	2U	89.6
TP3599	2U	89.6
TP17745	2U	89.97
TP1825	2U	91.06
TP31155	2U	91.06
TP36069	2U	92.89
TP40200	2U	95.47
TP154	2U	97.33
TP1113	2U	97.7
TP28258	2U	98.07
TP28339	2U	98.07
TP36547	2U	98.07
TP10924	2U	98.07
TP4370	2U	98.82
TP41725	2U	99.91
TP36512	2U	102.46
TP29939	2U	102.83
TP12756	2U	102.83
TP43978	2U	102.83
TP486	2U	102.83
TP35357	2U	104
TP27581	3U	0
TP2550	3U	2.97
TP33656	3U	4.83
TP4445	3U	5.2
TP18477	3U	5.2
TP20286	3U	5.96
TP9885	3U	17.55
TP37309	3U	19.44
TP31959	3U	20.58
TP19722	3U	20.96
TP3518	3U	24.41
TP4205	3U	24.78
TP41688	3U	25.14
TP27066	3U	25.5
TP44537	3U	25.5
TP33817	3U	25.5
TP44703	3U	25.5
TP44670	3U	25.5
TP18029	3U	25.5
TP14491	3U	26.6
TP37040	3U	28.43
TP14364	3U	28.43
TP39240	3U	29.15
TP3212	3U	30.24
TP8648	3U	30.61
TP19145	3U	30.98
TP41284	3U	30.98
TP29548	3U	30.98
TP6343	3U	30.98
TP29559	3U	30.98
TP15895	3U	32.17
TP5504	3U	32.17
TP29954	3U	32.53
TP36639	3U	32.53
TP17673	3U	32.9
TP14039	3U	32.9
TP16041	3U	32.9
TP26172	3U	32.9
TP41754	3U	32.9
TP6966	3U	33.62
TP30234	3U	33.62
TP25240	3U	33.62
TP1505	3U	33.62
TP35011	3U	33.62
TP25837	3U	33.62
TP38742	3U	33.62
TP33324	3U	33.62
TP6416	3U	33.62
TP7494	3U	33.62
TP10313	3U	33.62
TP11273	3U	33.62
TP4857	3U	33.62
TP29569	3U	33.62
TP43780	3U	33.62
TP30247	3U	33.62
TP13744	3U	33.62
TP5993	3U	33.62
TP29801	3U	33.62
TP24834	3U	33.62
TP10492	3U	33.62
TP252	3U	33.62
TP731	3U	33.62
TP34868	3U	33.98
TP9794	3U	34.35
TP45176	3U	34.71
TP10424	3U	34.71
TP4720	3U	34.71
TP16866	3U	35.07
TP46166	3U	35.81
TP42210	3U	36.17
TP22528	3U	36.17
TP35334	3U	36.17
TP38090	3U	36.17
TP38674	3U	36.54
TP45906	3U	36.54
TP9148	3U	36.54
TP10853	3U	36.54
TP25283	3U	36.54
TP2295	3U	36.54
TP26738	3U	36.54
TP2500	3U	36.91
TP19836	3U	36.91
TP30567	3U	36.91
TP25084	3U	36.91
TP27760	3U	36.91
TP37762	3U	36.91
TP5923	3U	37.28
TP4365	3U	38.02
TP30168	3U	38.4
TP7482	3U	39.18
TP20164	3U	39.94
TP2576	3U	39.94
TP42051	3U	39.94
TP35948	3U	41.04
TP10082	3U	41.41
TP12908	3U	41.41
TP922	3U	42.14
TP30916	3U	42.88
TP5464	3U	42.88
TP35319	3U	42.88
TP2815	3U	42.88
TP20249	3U	43.25
TP26688	3U	43.25
TP5151	3U	43.25
TP29690	3U	43.25
TP31164	3U	43.25
TP7693	3U	43.62
TP40788	3U	43.98
TP6470	3U	43.98
TP31821	3U	44.34
TP5583	3U	44.34
TP32548	3U	44.34
TP13401	3U	44.34
TP6190	3U	44.71
TP30770	3U	44.71
TP19215	3U	45.45
TP3082	3U	45.45
TP12020	3U	45.45
TP561	3U	45.82
TP38895	3U	46.18
TP28214	3U	46.18
TP30095	3U	46.18
TP13927	3U	46.54
TP3925	3U	49.84
TP43347	3U	52.09
TP33730	3U	53.6
TP36371	3U	54.35
TP20327	3U	66.12
TP16512	3U	69.07
TP25806	3U	69.8
TP5895	3U	72.02
TP3780	3U	72.76
TP35059	3U	72.76
TP200	3U	73.88
TP19770	3U	74.25
TP56	3U	74.25
TP1667	3U	74.99
TP3121	3U	74.99
TP38571	3U	74.99
TP37632	3U	76.84
TP40369	3U	77.58
TP38896	3U	77.58
TP37355	3U	78.67
TP34744	3U	79.03
TP5124	3U	80.88
TP26328	3U	80.88
TP7159	3U	81.24
TP2823	3U	81.98
TP4711	3U	81.98
TP26423	3U	82.36
TP38711	3U	82.74
TP24822	3U	82.74
TP14118	3U	83.5
TP13339	3U	84.24
TP11763	3U	86.07
TP4959	3U	86.07
TP17051	3U	86.45
TP25059	3U	87.21
TP9615	3U	87.57
TP30928	3U	89.04
TP21805	3U	90.13
TP26124	3U	90.49
TP13594	3U	90.86
TP9267	3U	91.63
TP34859	3U	93.95
TP21027	3U	93.95
TP45243	3U	93.95
TP15970	3U	94.31
TP25102	3U	94.31
TP336	3U	94.31
TP4420	3U	94.31
TP988	3U	98.49
TP9427	3U	98.85
TP2925	3U	98.85
TP44869	3U	98.85
TP32150	3U	98.85
TP32756	3U	98.85
TP33490	3U	98.85
TP5964	3U	99.22
TP397	3U	99.22
TP31073	3U	99.6
TP44088	3U	99.6
TP7698	3U	99.6
TP36615	3U	99.6
TP23280	3U	99.6
TP30696	3U	99.99
TP35490	3U	99.99
TP37755	3U	99.99
TP3743	3U	99.99
TP43210	3U	99.99
TP28544	3U	99.99
TP11874	3U	99.99
TP12635	3U	101.57
TP24221	3U	102.65
TP42950	3U	103.01
TP39141	3U	104.49
TP1078	3U	104.49
TP25264	3U	105.25
TP45085	3U	105.63
TP11973	3U	106.76
TP1849	3U	107.5
TP6147	3U	109.74
TP11644	3U	109.74
TP42967	3U	109.74
TP39118	3U	109.74
TP5239	3U	109.74
TP41368	3U	110.1
TP40450	4U	0
TP43630	4U	0.37
TP23887	4U	1.09
TP16998	4U	1.09
TP2151	4U	1.09
TP25250	4U	1.09
TP37332	4U	6.68
TP40735	4U	8.86
TP31250	4U	9.95
TP6790	4U	10.31
TP16750	4U	10.31
TP6597	4U	10.31
TP22072	4U	10.69
TP32325	4U	10.69
TP28428	4U	10.69
TP4430	4U	10.69
TP8756	4U	11.06
TP8945	4U	11.06
TP3357	4U	11.43
TP22263	4U	12.16
TP11962	4U	14.02
TP19508	4U	14.02
TP34599	4U	14.38
TP1910	4U	15.13
TP17226	4U	17.81
TP12807	4U	19.36
TP38051	4U	19.73
TP36146	4U	19.73
TP5809	4U	19.73
TP18478	4U	20.09
TP42930	4U	20.09
TP23039	4U	20.82
TP43506	4U	20.82
TP30673	4U	20.82
TP1148	4U	21.19
TP22171	4U	22.28
TP4296	4U	22.28
TP3627	4U	22.65
TP4477	4U	22.65
TP34374	4U	23.01
TP34574	4U	23.01
TP45512	4U	23.37
TP12831	4U	23.37
TP21189	4U	23.37
TP16784	4U	23.37
TP9174	4U	23.37
TP43571	4U	23.37
TP1873	4U	23.37
TP9804	4U	23.74
TP42937	4U	24.1
TP6918	4U	24.1
TP28705	4U	24.1
TP15100	4U	24.1
TP44478	4U	24.48
TP9802	4U	26.48
TP20014	4U	26.86
TP858	4U	26.86
TP4303	4U	27.23
TP7326	4U	27.23
TP9086	4U	27.6
TP42349	4U	27.6
TP23302	4U	27.96
TP26959	4U	27.96
TP17714	4U	27.96
TP35905	4U	27.96
TP3949	4U	27.96
TP24395	4U	27.96
TP19134	4U	28.68
TP21312	4U	28.68
TP26946	4U	29.77
TP40403	4U	30.5
TP39672	4U	30.5
TP26872	4U	30.5
TP13685	4U	30.5
TP28543	4U	30.5
TP12837	4U	30.5
TP28601	4U	30.5
TP3063	4U	30.5
TP13934	4U	32.4
TP45735	4U	33.12
TP27230	4U	33.12
TP33809	4U	33.12
TP1445	4U	33.48
TP32822	4U	33.48
TP12687	4U	34.61
TP3016	4U	35.33
TP45770	4U	36.05
TP36738	4U	36.78
TP10951	4U	37.86
TP4286	4U	39.33
TP6564	4U	39.33
TP23874	4U	39.33
TP26988	4U	39.7
TP36030	4U	39.7
TP6844	4U	40.07
TP13546	4U	41.16
TP31458	4U	41.88
TP6988	4U	42.62
TP26024	4U	42.99
TP19553	4U	43.35
TP3891	4U	43.35
TP6926	4U	44.82
TP42472	4U	45.92
TP17711	4U	47.01
TP42691	4U	47.74
TP31039	4U	48.46
TP33971	4U	48.82
TP15929	4U	48.82
TP169	4U	49.54
TP6914	4U	49.54
TP37596	4U	49.54
TP168	4U	49.91
TP42257	4U	51.73
TP37566	4U	52.1
TP12619	4U	52.83
TP13375	4U	52.83
TP30324	4U	52.83
TP37352	4U	54.64
TP25965	4U	54.64
TP21916	4U	54.64
TP18627	4U	54.64
TP36689	4U	55.01
TP25026	4U	55.01
TP32699	4U	56.47
TP29674	4U	56.83
TP38861	4U	57.55
TP6936	4U	57.91
TP949	4U	57.91
TP21022	4U	57.91
TP18217	4U	58.65
TP29463	4U	60.9
TP44966	4U	62.81
TP43153	4U	63.2
TP29178	4U	63.59
TP12997	4U	65.08
TP26771	4U	65.08
TP44212	4U	65.08
TP1895	4U	65.08
TP43395	4U	65.08
TP29634	4U	65.08
TP21668	4U	65.44
TP23284	4U	65.44
TP39422	4U	65.81
TP19605	4U	66.54
TP30092	4U	66.54
TP29386	4U	66.54
TP24905	4U	66.91
TP41444	4U	66.91
TP18306	4U	66.91
TP11845	4U	66.91
TP43155	4U	66.91
TP14728	4U	66.91
TP27373	4U	66.91
TP10336	4U	66.91
TP8914	4U	66.91
TP588	4U	66.91
TP2557	4U	66.91
TP24076	4U	66.91
TP22977	4U	67.64
TP42188	4U	68.01
TP40393	4U	68.01
TP14038	4U	68.76
TP951	4U	68.76
TP32608	4U	69.12
TP18193	4U	69.12
TP13188	4U	69.12
TP23448	4U	69.12
TP11835	4U	69.12
TP39347	4U	69.12
TP6225	4U	69.5
TP30277	4U	69.5
TP6482	4U	70.99
TP7633	4U	70.99
TP7644	4U	70.99
TP43812	4U	70.99
TP14935	4U	70.99
TP5344	4U	70.99
TP36495	4U	71.35
TP16777	4U	72.07
TP38661	4U	72.07
TP5263	4U	73.96
TP41550	4U	75.07
TP14096	4U	75.07
TP43451	4U	75.07
TP24192	4U	75.07
TP20196	4U	75.07
TP3897	4U	75.44
TP1628	4U	75.44
TP23031	4U	75.44
TP23564	4U	75.44
TP15908	4U	75.44
TP3989	4U	75.8
TP43896	4U	76.89
TP37106	4U	76.89
TP13798	4U	78.39
TP543	4U	78.39
TP20705	4U	79.12
TP36778	4U	79.5
TP8559	4U	80.23
TP38916	4U	80.23
TP28469	4U	80.6
TP25784	4U	80.6
TP14315	4U	80.6
TP23862	4U	80.6
TP16159	4U	80.97
TP5973	4U	81.69
TP361	4U	82.06
TP17040	4U	82.06
TP11370	4U	83.52
TP24617	4U	83.52
TP12643	4U	83.52
TP7586	4U	84.61
TP2427	4U	86.06
TP10117	4U	86.43
TP10116	4U	86.43
TP11540	4U	86.8
TP41939	4U	88.33
TP12240	4U	88.33
TP16834	4U	88.33
TP9457	4U	88.71
TP45135	4U	89.07
TP2806	4U	89.44
TP42824	4U	89.44
TP17148	4U	89.44
TP4614	4U	89.44
TP5796	4U	89.8
TP33197	4U	89.8
TP26846	4U	89.8
TP43359	4U	89.8
TP8431	4U	89.8
TP30912	4U	89.8
TP26633	4U	89.8
TP43187	4U	90.55
TP43497	4U	90.55
TP28813	4U	90.94
TP12999	4U	91.7
TP32122	4U	92.07
TP13446	4U	92.07
TP32662	4U	92.44
TP42870	4U	92.44
TP37808	4U	93.18
TP14644	4U	93.18
TP34733	4U	93.18
TP17535	4U	93.54
TP349	4U	94.64
TP37666	4U	96.47
TP13595	4U	96.84
TP9809	4U	96.84
TP28236	4U	96.84
TP42574	4U	96.84
TP37399	4U	96.84
TP44392	4U	96.84
TP22559	4U	96.84
TP39612	4U	96.84
TP14065	4U	96.84
TP16722	4U	96.84
TP32999	4U	96.84
TP31252	4U	96.84
TP43143	4U	96.84
TP29251	4U	96.84
TP37227	4U	96.84
TP26725	4U	96.84
TP11716	4U	96.84
TP29159	4U	96.84
TP34772	4U	96.84
TP29681	4U	96.84
TP12555	4U	96.84
TP2067	4U	96.84
TP32858	4U	96.84
TP11221	4U	96.84
TP23129	4U	97.2
TP9692	4U	97.57
TP12877	4U	97.57
TP7941	4U	98.31
TP36292	4U	98.68
TP28432	4U	98.68
TP42714	4U	98.68
TP27954	4U	98.68
TP32268	4U	99.05
TP38123	4U	99.8
TP32152	4U	100.17
TP673	4U	100.91
TP18703	4U	100.91
TP27568	4U	102.01
TP20676	4U	102.01
TP33872	4U	102.01
TP2001	4U	103.92
TP12395	4U	104.68
TP30899	4U	105.83
TP24569	4U	106.2
TP5986	4U	106.58
TP20654	4U	106.96
TP18596	4U	106.96
TP27451	4U	106.96
TP40806	4U	108.46
TP854	4U	108.82
TP16661	4U	110.64
TP44351	4U	110.64
TP30726	4U	110.64
TP40807	4U	110.64
TP22211	4U	110.64
TP12714	4U	110.64
TP38460	4U	110.64
TP13439	4U	110.64
TP26472	4U	110.64
TP1059	4U	111.01
TP1657	4U	112.11
TP11905	4U	112.11
TP18087	4U	113.6
TP21143	4U	114.7
TP43036	4U	117
TP14912	4U	118.15
TP18082	4U	118.51
TP44396	4U	118.51
TP11932	4U	118.51
TP6071	4U	118.51
TP34749	4U	118.88
TP40405	4U	118.88
TP28606	4U	119.24
TP2615	4U	119.98
TP9918	4U	119.98
TP15245	4U	119.98
TP23839	4U	120.34
TP41775	4U	120.72
TP21192	4U	120.72
TP580	4U	121.1
TP37570	4U	122.58
TP37890	4U	122.58
TP18674	4U	122.58
TP1324	4U	122.58
TP37661	4U	122.58
TP26421	4U	122.95
TP34883	4U	122.95
TP3409	4U	122.95
TP4744	4U	122.95
TP9853	4U	122.95
TP29012	4U	122.95
TP2597	4U	122.95
TP43589	4U	123.32
TP7889	4U	123.32
TP8658	4U	123.68
TP1517	4U	123.68
TP41770	4U	123.68
TP16172	4U	123.68
TP13596	4U	124.04
TP45305	4U	125.52
TP11345	4U	127.77
TP6193	4U	128.5
TP41190	4U	129.23
TP21929	4U	129.23
TP38910	4U	130.34
TP7006	4U	130.7
TP1315	4U	131.06
TP37251	4U	132.17
TP33070	4U	132.92
TP3242	4U	133.29
TP27957	4U	133.29
TP33675	4U	133.29
TP3420	4U	133.29
TP1735	4U	134.38
TP10893	4U	134.75
TP3610	4U	135.48
TP9964	4U	135.88
TP16664	4U	135.88
TP34875	4U	136.25
TP25832	4U	136.25
TP26438	4U	136.62
TP4759	4U	136.98
TP3140	4U	137.36
TP34199	4U	137.36
TP14744	4U	137.72
TP4649	4U	139.54
TP25347	4U	141.72
TP9478	4U	143.56
TP18483	4U	143.56
TP25891	4U	144.29
TP30465	4U	144.67
TP1233	4U	144.67
TP11005	4U	146.52
TP31105	4U	147.62
TP24423	4U	148.36
TP14514	4U	151.37
TP37134	4U	152.47
TP29493	4U	152.84
TP13116	4U	152.84
TP18416	4U	153.2
TP41081	4U	154.65
TP26696	5U	0
TP19832	5U	1.19
TP35956	5U	1.19
TP17299	5U	1.58
TP18283	5U	2.35
TP4765	5U	2.72
TP13059	5U	4.61
TP26853	5U	5.43
TP2540	5U	5.43
TP25449	5U	5.79
TP35962	5U	5.79
TP43635	5U	5.79
TP35321	5U	5.79
TP30841	5U	5.79
TP5835	5U	7.67
TP6858	5U	9.14
TP19391	5U	11.72
TP22000	5U	12.44
TP34005	5U	13.9
TP2813	5U	13.9
TP30717	5U	14.26
TP18822	5U	14.63
TP27178	5U	16.14
TP43474	5U	17.6
TP17277	5U	17.6
TP19834	5U	18.7
TP2243	5U	18.7
TP36103	5U	19.06
TP41203	5U	20.59
TP28235	5U	20.59
TP1908	5U	20.96
TP31780	5U	20.96
TP10890	5U	21.69
TP39795	5U	22.05
TP33117	5U	22.05
TP20830	5U	22.8
TP15520	5U	23.17
TP30575	5U	23.89
TP17151	5U	23.89
TP33075	5U	23.89
TP28341	5U	23.89
TP12102	5U	24.63
TP25604	5U	24.99
TP16415	5U	24.99
TP25319	5U	24.99
TP23787	5U	27.61
TP42576	5U	28.34
TP27446	5U	28.34
TP44637	5U	28.34
TP10398	5U	28.34
TP33338	5U	28.34
TP20218	5U	28.72
TP14517	5U	30.19
TP23870	5U	30.19
TP46155	5U	31.64
TP24204	5U	31.64
TP10533	5U	32.38
TP38627	5U	33.47
TP35689	5U	34.2
TP34767	5U	34.93
TP33093	5U	35.29
TP38911	5U	35.65
TP15447	5U	35.65
TP32712	5U	35.65
TP4199	5U	36.38
TP39512	5U	36.74
TP12699	5U	36.74
TP3189	5U	36.74
TP3827	5U	36.74
TP6786	5U	38.24
TP11366	5U	38.24
TP10756	5U	38.24
TP19167	5U	38.24
TP12563	5U	38.61
TP14053	5U	38.61
TP18051	5U	38.61
TP17233	5U	38.61
TP12560	5U	38.61
TP24417	5U	38.61
TP3144	5U	38.61
TP2871	5U	38.61
TP26265	5U	38.61
TP3338	5U	38.61
TP39598	5U	38.61
TP25579	5U	38.61
TP17442	5U	39.34
TP18414	5U	39.7
TP16130	5U	39.7
TP29516	5U	39.7
TP14331	5U	40.06
TP4444	5U	40.06
TP1430	5U	40.44
TP38678	5U	43.11
TP41488	5U	43.11
TP40508	5U	43.11
TP19683	5U	43.11
TP31824	5U	43.11
TP3141	5U	43.11
TP37958	5U	44.61
TP18426	5U	44.61
TP1623	5U	44.61
TP18733	5U	44.61
TP34381	5U	44.61
TP4504	5U	44.61
TP4367	5U	44.61
TP43999	5U	44.61
TP42444	5U	44.98
TP26389	5U	44.98
TP18074	5U	44.98
TP39173	5U	44.98
TP22189	5U	46.09
TP11642	5U	46.83
TP17236	5U	49.42
TP3324	5U	49.78
TP1973	5U	50.14
TP29574	5U	50.51
TP19368	5U	53.12
TP5364	5U	53.12
TP28696	5U	53.12
TP35983	5U	53.12
TP43771	5U	53.12
TP7431	5U	53.12
TP34843	5U	53.84
TP41063	5U	54.58
TP27861	5U	54.58
TP7552	5U	54.58
TP14795	5U	54.94
TP28348	5U	56.04
TP31209	5U	56.77
TP40956	5U	58.23
TP20856	5U	58.23
TP44176	5U	58.97
TP32654	5U	58.97
TP39726	5U	59.71
TP38146	5U	62.64
TP5423	5U	63.72
TP33053	5U	63.72
TP23989	5U	64.11
TP7627	5U	64.11
TP6488	5U	64.11
TP35869	5U	64.85
TP4709	5U	65.96
TP45967	5U	66.32
TP22741	5U	67.47
TP5599	5U	67.85
TP2080	5U	68.22
TP18664	5U	68.22
TP13946	5U	68.22
TP12342	5U	68.22
TP8639	5U	68.98
TP28133	5U	68.98
TP29005	5U	68.98
TP42699	5U	69.39
TP23882	5U	70.22
TP7064	5U	71.01
TP17474	5U	71.38
TP38310	5U	71.38
TP5677	5U	71.38
TP18128	5U	71.75
TP8967	5U	72.48
TP6653	5U	72.48
TP12867	5U	72.85
TP14317	5U	74.03
TP37658	5U	74.03
TP20077	5U	74.03
TP43138	5U	75.14
TP39460	5U	75.14
TP6069	5U	75.14
TP39470	5U	75.14
TP28368	5U	75.14
TP39072	5U	76.34
TP21184	5U	76.71
TP9816	5U	78.16
TP30153	5U	78.16
TP20070	5U	78.91
TP12049	5U	78.91
TP1661	5U	78.91
TP23352	5U	79.31
TP8917	5U	81.28
TP1380	5U	81.28
TP4527	5U	81.28
TP38909	5U	81.28
TP9666	5U	81.28
TP230	5U	81.28
TP19158	5U	84.32
TP39893	5U	84.68
TP22790	5U	85.78
TP28852	5U	85.78
TP41309	5U	85.78
TP4411	5U	86.56
TP18337	5U	86.95
TP29439	5U	88.15
TP39083	5U	88.53
TP5361	5U	88.53
TP2858	5U	88.9
TP6435	5U	89.28
TP11774	5U	89.65
TP3667	5U	89.65
TP1917	5U	89.65
TP38578	5U	89.65
TP9262	5U	89.65
TP28827	5U	89.65
TP41610	5U	89.65
TP29404	5U	89.65
TP27583	5U	89.65
TP28809	5U	89.65
TP13792	5U	90.77
TP8466	5U	90.77
TP44253	5U	91.13
TP34666	5U	91.49
TP44928	5U	91.49
TP3884	5U	91.49
TP43541	5U	91.49
TP36164	5U	91.86
TP15150	5U	91.86
TP25479	5U	91.86
TP4317	5U	91.86
TP12291	5U	92.23
TP35843	5U	92.23
TP14673	5U	92.59
TP2163	5U	92.96
TP9933	5U	92.96
TP975	5U	93.32
TP44401	5U	93.32
TP15011	5U	93.32
TP34303	5U	93.32
TP33190	5U	93.69
TP33914	5U	94.06
TP45064	5U	95.18
TP33118	5U	95.54
TP22707	5U	95.54
TP38373	5U	95.54
TP12614	5U	95.54
TP38240	5U	95.54
TP30499	5U	97.02
TP14362	5U	98.86
TP26659	6U	0
TP24042	6U	0
TP29256	6U	1.48
TP16366	6U	1.48
TP34750	6U	1.48
TP45196	6U	1.48
TP12841	6U	8.36
TP43735	6U	15.2
TP7676	6U	15.56
TP22108	6U	17.03
TP33041	6U	19.62
TP3320	6U	21.07
TP34725	6U	22.16
TP34562	6U	23.26
TP15054	6U	23.63
TP17300	6U	25.09
TP27979	6U	25.45
TP23765	6U	25.45
TP23502	6U	27.28
TP12690	6U	28.01
TP14807	6U	28.73
TP29902	6U	29.82
TP23291	6U	30.55
TP25046	6U	34.63
TP18377	6U	34.63
TP46013	6U	35.01
TP19457	6U	35.76
TP44885	6U	36.85
TP7318	6U	36.85
TP1516	6U	40.92
TP38892	6U	41.29
TP26586	6U	41.65
TP15856	6U	43.85
TP29471	6U	44.58
TP9670	6U	44.58
TP1481	6U	44.96
TP7139	6U	45.33
TP14783	6U	45.33
TP39904	6U	45.33
TP14685	6U	45.33
TP24265	6U	47.55
TP16792	6U	47.55
TP14658	6U	47.55
TP6030	6U	48.3
TP39479	6U	48.67
TP7003	6U	49.8
TP42770	6U	49.8
TP31463	6U	50.17
TP32550	6U	50.17
TP33386	6U	50.94
TP26532	6U	52.47
TP17531	6U	52.47
TP25108	6U	52.47
TP38654	6U	52.47
TP5372	6U	52.47
TP35966	6U	52.84
TP38320	6U	53.96
TP38980	6U	53.96
TP11220	6U	53.96
TP4081	6U	53.96
TP38882	6U	55.08
TP19077	6U	55.46
TP10880	6U	55.46
TP16817	6U	55.46
TP3245	6U	55.46
TP10011	6U	55.46
TP33721	6U	55.46
TP31018	6U	55.46
TP28094	6U	55.83
TP21598	6U	55.83
TP34260	6U	56.19
TP23734	6U	56.19
TP32303	6U	56.19
TP31202	6U	56.93
TP45871	6U	57.29
TP41718	6U	57.29
TP12185	6U	57.29
TP13415	6U	57.65
TP1180	6U	57.65
TP22197	6U	58.02
TP18634	6U	58.02
TP2173	6U	58.02
TP18044	6U	58.02
TP15516	6U	58.38
TP8345	6U	58.38
TP1107	6U	58.38
TP25831	6U	58.38
TP36365	6U	58.38
TP18382	6U	58.38
TP35643	6U	58.75
TP18295	6U	58.75
TP37424	6U	59.11
TP8456	6U	59.11
TP3133	6U	59.11
TP36847	6U	59.11
TP39872	6U	59.11
TP12969	6U	59.11
TP37102	6U	59.11
TP2473	6U	59.11
TP41103	6U	59.47
TP20650	6U	60.21
TP43615	6U	60.21
TP41273	6U	60.57
TP30154	6U	60.57
TP3206	6U	60.94
TP21522	6U	61.31
TP6393	6U	62.04
TP30283	6U	62.04
TP2384	6U	62.4
TP41441	6U	62.4
TP44484	6U	62.4
TP24820	6U	63.49
TP5691	6U	63.49
TP43283	6U	63.49
TP12306	6U	63.49
TP38304	6U	63.85
TP3083	6U	63.85
TP1564	6U	63.85
TP32013	6U	63.85
TP803	6U	63.85
TP13122	6U	63.85
TP37027	6U	63.85
TP11442	6U	63.85
TP34670	6U	63.85
TP2598	6U	63.85
TP28925	6U	63.85
TP27091	6U	63.85
TP33537	6U	63.85
TP8778	6U	64.23
TP42322	6U	64.23
TP1106	6U	64.23
TP36745	6U	64.23
TP8299	6U	64.23
TP3003	6U	64.23
TP6917	6U	64.23
TP24193	6U	64.23
TP1332	6U	64.23
TP29413	6U	64.23
TP30881	6U	64.23
TP25345	6U	64.59
TP45727	6U	65.32
TP24346	6U	65.32
TP9650	6U	65.32
TP290	6U	65.68
TP33620	6U	66.04
TP12970	6U	66.04
TP5791	6U	66.77
TP30552	6U	66.77
TP6695	6U	67.13
TP37446	6U	67.13
TP14383	6U	67.13
TP15409	6U	67.49
TP45469	6U	67.49
TP36064	6U	67.49
TP27505	6U	67.49
TP16213	6U	67.49
TP38528	6U	67.49
TP38777	6U	67.85
TP29476	6U	67.85
TP29397	6U	67.85
TP7725	6U	67.85
TP44402	6U	67.85
TP34048	6U	67.85
TP32495	6U	68.22
TP35324	6U	68.22
TP29121	6U	68.22
TP25508	6U	68.59
TP21928	6U	68.59
TP20829	6U	68.59
TP24146	6U	68.59
TP10182	6U	68.96
TP9257	6U	69.33
TP31703	6U	69.33
TP4797	6U	69.33
TP3683	6U	69.33
TP34950	6U	69.33
TP24041	6U	69.33
TP8317	6U	69.33
TP5154	6U	69.33
TP11466	6U	69.33
TP43850	6U	69.33
TP28188	6U	69.33
TP1066	6U	69.33
TP19387	6U	69.33
TP8073	6U	69.33
TP10134	6U	69.33
TP38302	6U	69.33
TP44749	6U	69.33
TP45632	6U	69.33
TP26921	6U	69.33
TP26531	6U	69.33
TP32286	6U	69.33
TP12038	6U	69.33
TP42126	6U	69.33
TP43386	6U	69.33
TP2471	6U	69.33
TP5821	6U	69.33
TP2518	6U	69.33
TP39869	6U	69.33
TP41445	6U	69.33
TP1504	6U	69.33
TP45044	6U	69.33
TP10856	6U	69.33
TP44440	6U	69.33
TP37416	6U	69.69
TP3336	6U	69.69
TP34281	6U	69.69
TP19395	6U	70.06
TP7248	6U	70.06
TP18142	6U	70.06
TP18767	6U	70.06
TP4502	6U	70.8
TP44935	6U	70.8
TP1949	6U	71.17
TP11103	6U	71.54
TP37228	6U	71.54
TP30764	6U	71.54
TP3108	6U	71.9
TP35522	6U	72.26
TP20165	6U	72.26
TP26422	6U	72.26
TP41340	6U	72.26
TP8901	6U	72.26
TP18577	6U	72.26
TP26590	6U	72.26
TP23491	6U	72.63
TP18130	6U	72.63
TP3558	6U	72.99
TP19542	6U	72.99
TP4795	6U	73.73
TP13259	6U	73.73
TP14602	6U	73.73
TP40317	6U	73.73
TP23024	6U	73.73
TP29373	6U	73.73
TP17159	6U	73.73
TP4563	6U	73.73
TP17046	6U	74.09
TP33160	6U	74.09
TP38286	6U	74.46
TP34218	6U	74.46
TP4164	6U	74.46
TP14745	6U	74.46
TP5585	6U	74.46
TP13389	6U	74.82
TP25124	6U	75.55
TP41442	6U	75.55
TP8207	6U	75.55
TP11917	6U	75.55
TP34220	6U	75.55
TP3966	6U	75.55
TP44142	6U	75.55
TP2578	6U	75.55
TP43818	6U	75.91
TP9281	6U	76.63
TP1145	6U	76.63
TP33346	6U	76.63
TP41548	6U	76.63
TP27102	6U	76.63
TP2917	6U	76.99
TP18181	6U	77.36
TP42998	6U	77.36
TP31412	6U	77.36
TP2833	6U	77.36
TP4663	6U	77.72
TP43173	6U	77.72
TP32810	6U	77.72
TP22266	6U	77.72
TP43106	6U	78.08
TP29659	6U	78.08
TP37035	6U	78.08
TP30073	6U	78.44
TP42923	6U	78.44
TP26536	6U	79.17
TP3926	6U	79.53
TP22051	6U	79.53
TP6691	6U	79.53
TP25315	6U	79.9
TP44559	6U	79.9
TP7316	6U	80.26
TP37823	6U	80.26
TP39393	6U	80.26
TP34481	6U	80.26
TP45516	6U	80.63
TP31996	6U	81.35
TP17470	6U	81.71
TP11022	6U	83.16
TP33132	6U	83.16
TP17974	6U	83.16
TP2488	6U	83.54
TP8361	6U	83.92
TP27356	6U	83.92
TP26861	6U	83.92
TP41540	6U	83.92
TP6647	6U	83.92
TP11389	6U	84.31
TP6508	6U	84.31
TP43746	6U	84.31
TP35603	6U	84.31
TP45745	6U	85.48
TP36582	6U	86.2
TP9382	6U	86.56
TP740	6U	86.56
TP9881	6U	87.29
TP20325	6U	88.78
TP10144	6U	89.91
TP4255	6U	89.91
TP5947	6U	89.91
TP27928	6U	90.28
TP44799	6U	90.28
TP5786	6U	90.28
TP24535	6U	90.64
TP34962	6U	90.64
TP28655	6U	92.14
TP17417	6U	92.14
TP3159	6U	92.51
TP43679	6U	93.62
TP45489	6U	94.35
TP9568	6U	94.35
TP18920	6U	94.73
TP3830	6U	95.83
TP16967	6U	97.66
TP7282	6U	98.03
TP10774	6U	98.03
TP7871	6U	98.76
TP31213	6U	99.13
TP25439	6U	99.5
TP46034	6U	99.87
TP36028	6U	101.34
TP1589	6U	102.43
TP21239	6U	103.15
TP25009	6U	104.98
TP10496	6U	105.71
TP28344	6U	106.44
TP6548	6U	108.27
TP3303	6U	109.37
TP10596	6U	109.37
TP25417	6U	109.37
TP27697	6U	109.37
TP40233	6U	109.37
TP13309	6U	109.37
TP24778	6U	110.1
TP33540	6U	111.19
TP34628	6U	111.56
TP26537	6U	112.65
TP41097	6U	115.6
TP1374	6U	115.6
TP24607	6U	115.6
TP19979	6U	115.6
TP40411	6U	115.6
TP42513	6U	115.6
TP34719	6U	115.6
TP23919	6U	115.96
TP15934	6U	117.42
TP38761	6U	117.42
TP95	6U	117.79
TP45033	6U	118.16
TP26928	6U	118.16
TP30349	6U	118.52
TP28927	6U	119.63
TP19688	6U	120
TP17958	6U	120
TP13659	6U	120
TP26897	6U	120.36
TP13237	6U	121.46
TP11765	6U	122.65
TP38981	6U	123.05
TP42708	6U	123.79
TP41395	6U	125.66
TP20323	6U	126.02
TP45937	6U	126.02
TP19785	6U	126.02
TP21269	6U	126.02
TP321	6U	129.56
TP2314	6U	129.92
TP2884	6U	130.65
TP43748	6U	131.37
TP17265	6U	132.1
TP13682	6U	133.58
TP26859	7U	0
TP12532	7U	1.86
TP44232	7U	1.86
TP2155	7U	1.86
TP32134	7U	2.23
TP40339	7U	2.23
TP1024	7U	15.58
TP39494	7U	18.15
TP35976	7U	19.61
TP5744	7U	20.71
TP1904	7U	27.11
TP16497	7U	27.11
TP4425	7U	27.84
TP24211	7U	28.56
TP41746	7U	31.13
TP27526	7U	31.86
TP33504	7U	31.86
TP1502	7U	32.22
TP22660	7U	32.22
TP10121	7U	32.58
TP8864	7U	34.43
TP39496	7U	35.51
TP43810	7U	35.87
TP4047	7U	35.87
TP16361	7U	36.95
TP34096	7U	36.95
TP45056	7U	36.95
TP32998	7U	37.32
TP40107	7U	37.68
TP13091	7U	38.04
TP34660	7U	38.04
TP9622	7U	38.04
TP24314	7U	38.79
TP24637	7U	39.52
TP23585	7U	40.26
TP17850	7U	40.26
TP28930	7U	40.98
TP18063	7U	40.98
TP37020	7U	41.34
TP18235	7U	41.7
TP2472	7U	42.07
TP22643	7U	43.17
TP13379	7U	43.17
TP35445	7U	43.17
TP41491	7U	44.27
TP39191	7U	45.75
TP38534	7U	45.75
TP37964	7U	45.75
TP43544	7U	45.75
TP37802	7U	46.47
TP11864	7U	48.3
TP28605	7U	49.04
TP44711	7U	49.04
TP17796	7U	49.42
TP16559	7U	49.42
TP2822	7U	49.78
TP32341	7U	51.27
TP27610	7U	51.63
TP25732	7U	51.63
TP19498	7U	51.63
TP11969	7U	53.53
TP34328	7U	55.34
TP16774	7U	57.2
TP13883	7U	57.95
TP19675	7U	59.79
TP14205	7U	63.46
TP36926	7U	63.46
TP18698	7U	63.82
TP21324	7U	64.55
TP26881	7U	65.65
TP43338	7U	65.65
TP5332	7U	65.65
TP119	7U	66.01
TP39482	7U	66.39
TP14068	7U	66.76
TP14565	7U	67.13
TP29572	7U	67.13
TP6068	7U	67.86
TP39414	7U	67.86
TP27042	7U	67.86
TP21048	7U	67.86
TP36533	7U	67.86
TP27432	7U	68.23
TP33262	7U	69.33
TP44735	7U	69.33
TP26955	7U	70.79
TP25689	7U	71.15
TP22568	7U	72.25
TP15542	7U	72.61
TP23524	7U	72.61
TP2791	7U	72.61
TP41854	7U	73.33
TP16748	7U	73.33
TP34028	7U	74.05
TP16300	7U	74.05
TP34054	7U	74.42
TP15276	7U	74.42
TP6909	7U	74.42
TP5825	7U	75.17
TP38649	7U	78.23
TP36841	7U	78.59
TP25746	7U	79.35
TP4762	7U	80.1
TP23169	7U	80.1
TP31215	7U	80.1
TP44468	7U	80.1
TP19937	7U	80.49
TP15518	7U	80.49
TP17156	7U	80.85
TP10250	7U	81.96
TP34879	7U	82.33
TP10609	7U	82.33
TP36842	7U	82.33
TP34263	7U	82.69
TP18168	7U	82.69
TP24728	7U	83.42
TP34339	7U	83.8
TP9784	7U	84.17
TP380	7U	84.17
TP3504	7U	84.17
TP42982	7U	84.17
TP43983	7U	84.56
TP45227	7U	84.56
TP32099	7U	84.56
TP13972	7U	84.56
TP22772	7U	84.93
TP5345	7U	87.19
TP34624	7U	87.56
TP31198	7U	87.56
TP15539	7U	88.28
TP45164	7U	89.01
TP12929	7U	89.01
TP19150	7U	89.01
TP28940	7U	89.01
TP10649	7U	89.37
TP43088	7U	89.73
TP44977	7U	90.11
TP39250	7U	90.49
TP33607	7U	90.86
TP43102	7U	91.61
TP9106	7U	91.61
TP36665	7U	91.61
TP18997	7U	91.61
TP20685	7U	91.61
TP12636	7U	91.61
TP12480	7U	91.61
TP29958	7U	92.76
TP1238	7U	93.12
TP35401	7U	93.86
TP19546	7U	94.23
TP43601	7U	94.6
TP37824	7U	94.96
TP18174	7U	94.96
TP11861	7U	95.33
TP6785	7U	96.07
TP8816	7U	96.79
TP40994	7U	97.15
TP2832	7U	97.15
TP20033	7U	99.78
TP45590	7U	99.78
TP44492	7U	101.27
TP30650	7U	101.27
TP6692	7U	105.03
TP30415	7U	106.92
TP6854	7U	107.3
TP42002	7U	107.3
TP14191	7U	107.67
TP41173	7U	107.67
TP11659	7U	109.58
TP39674	7U	109.58
TP10693	7U	110.32
TP42752	7U	110.32
TP25854	7U	110.32
TP21803	7U	110.32
TP4738	7U	110.7
TP5489	7U	110.7
TP27193	7U	111.07
TP46124	7U	111.44
TP33811	7U	112.89
TP45029	7U	113.26
TP16597	7U	113.26
TP20662	7U	113.26
TP33248	7U	115.56
TP40594	7U	115.56
TP813	7U	115.93
TP19740	7U	116.3
TP21570	7U	116.3
TP32622	7U	116.3
TP39605	7U	117.83
TP41823	7U	117.83
TP31479	7U	117.83
TP40178	7U	117.83
TP20985	7U	118.2
TP1925	7U	118.2
TP25298	7U	118.2
TP20656	7U	118.2
TP45794	7U	118.2
TP6968	7U	118.2
TP45386	7U	118.2
TP38667	7U	118.57
TP2089	7U	118.94
TP28964	7U	119.31
TP7308	7U	120.42
TP30642	7U	121.14
TP44742	7U	121.5
TP32650	7U	121.5
TP37464	7U	122.24
TP28732	7U	122.61
TP6523	7U	122.97
TP11737	7U	123.7
TP17595	7U	124.78
TP3474	7U	124.78
TP25128	7U	124.78
TP8412	7U	126.31
TP2088	7U	126.31
TP34886	7U	126.31
TP8724	7U	126.67
TP30104	7U	127.77
TP34494	7U	128.14
TP3911	7U	128.14
TP43392	7U	128.88
TP37055	7U	129.26
TP34332	7U	129.62
TP26704	7U	129.62
TP35508	7U	129.62
TP32971	7U	129.62
TP13916	7U	129.98
TP32698	7U	129.98
TP41330	7U	129.98
TP255	7U	129.98
TP9312	7U	130.77
TP982	7U	134.52
TP7954	7U	134.52
TP7559	7U	134.52
TP22966	7U	135.25
TP37291	7U	135.61
TP26067	7U	135.61
TP37438	7U	135.61
TP9146	7U	136.7
TP44845	7U	137.07
TP1452	7U	137.07
TP1358	7U	137.07
TP362	7U	137.07
TP39190	7U	137.07
TP39172	7U	137.07
TP30935	7U	137.07
TP37789	7U	137.43
TP3423	7U	137.79
TP29207	7U	138.88
TP14239	7U	138.88
TP7929	7U	138.88
TP9641	7U	139.24
TP42688	7U	139.24
TP5460	7U	139.24
TP27775	7U	139.6
TP20168	7U	140.33
TP13947	7U	141.05
TP22595	7U	141.41
TP33200	7U	141.41
TP40995	7U	141.78
TP24025	7U	141.78
TP21983	7U	142.14
TP40927	7U	142.14
TP10763	7U	142.14
TP36218	7U	142.14
TP16051	7U	142.14
TP42696	7U	142.14
TP18039	7U	142.51
TP17194	7U	142.51
TP30900	7U	144.32
TP11991	7U	144.69
TP1780	7U	144.69
TP3673	7U	145.05
TP42701	7U	145.05
TP45635	7U	145.41
TP27260	7U	145.41
TP11784	7U	145.78
TP32124	7U	146.14
TP28499	7U	146.87
TP17753	7U	146.87
TP18093	7U	146.87
TP28271	7U	147.23
TP36131	7U	147.23
TP36763	7U	147.23
TP39350	7U	147.95
TP27069	7U	147.95
TP42663	7U	148.32
TP17693	7U	148.32
TP41223	7U	148.68
TP15222	7U	149.04
TP24375	7U	149.04
TP28959	7U	149.04
TP6359	7U	149.4
TP12263	7U	150.12
TP39776	7U	150.85
TP41792	7U	150.85
TP36856	7U	151.57
TP44531	7U	154.86
TP17110	7U	160.04
TP41523	7U	160.76
TP3672	7U	161.86
TP3293	7U	162.22
TP3694	7U	162.95
TP46230	7U	162.95
TP44199	7U	163.32
TP31559	7U	166.64
TP44679	7U	168.45
TP3200	7U	169.55
TP39590	7U	169.55
TP38530	7U	169.91
TP30538	7U	170.27
TP31196	7U	171
TP346	7U	171
TP8861	7U	171
TP13876	7U	171.38
TP10434	7U	171.38
TP28882	7U	171.74
TP26936	7U	173.21
TP39850	7U	175.46
TP30607	7U	175.46

## Sheet: Aeupop2_antmap
Linkage maps fo Aeupop2 using Antmap
Markers	Chr	cM
TP37062	1U	0
TP12036	1U	1.07
TP11940	1U	2.9
TP1716	1U	4.34
TP6797	1U	5.37
TP2652	1U	5.72
TP36958	1U	5.72
TP18365	1U	5.72
TP9663	1U	5.72
TP3277	1U	6.39
TP10417	1U	6.39
TP24840	1U	6.73
TP18785	1U	6.73
TP22136	1U	9.81
TP19692	1U	10.15
TP44856	1U	10.86
TP11364	1U	11.88
TP18749	1U	14.41
TP29165	1U	17.82
TP29741	1U	19.6
TP15762	1U	20.28
TP5737	1U	24.81
TP14622	1U	26.85
TP14812	1U	27.88
TP44152	1U	28.55
TP43284	1U	28.89
TP41988	1U	29.57
TP17007	1U	30.63
TP6532	1U	32.11
TP25558	1U	33.53
TP20140	1U	37.31
TP15585	1U	38.66
TP12859	1U	41.73
TP4796	1U	46.3
TP45769	1U	47.34
TP5596	1U	49.05
TP16056	1U	49.72
TP36482	1U	50.4
TP26763	1U	52.45
TP27231	1U	55.18
TP33896	2U	0
TP38110	2U	0.71
TP24398	2U	1.06
TP39315	2U	1.06
TP2975	2U	1.06
TP2708	2U	1.4
TP15120	2U	1.4
TP34533	2U	3.95
TP45811	2U	5.69
TP44075	2U	6.76
TP27621	2U	7.45
TP45053	2U	7.45
TP11108	2U	7.45
TP22151	2U	7.45
TP7707	2U	7.45
TP17619	2U	7.8
TP31777	2U	8.14
TP42764	2U	8.14
TP45079	2U	10.54
TP8127	2U	10.88
TP9495	2U	10.88
TP25456	2U	10.88
TP34216	2U	10.88
TP4896	2U	11.64
TP17921	2U	11.64
TP35482	2U	12.01
TP4014	2U	12.38
TP41829	2U	13.76
TP12133	2U	13.76
TP25382	2U	14.09
TP40872	2U	14.78
TP40433	2U	16.18
TP1226	2U	16.52
TP32529	2U	16.52
TP940	2U	17.88
TP35076	2U	20.28
TP29382	2U	22.33
TP22436	2U	22.66
TP2622	2U	23.69
TP2058	2U	23.69
TP13805	2U	24.04
TP38960	2U	24.38
TP21020	2U	25.07
TP15110	2U	25.07
TP38193	2U	26.81
TP11379	2U	27.85
TP42238	2U	28.2
TP23584	2U	28.87
TP31741	2U	28.87
TP27162	2U	29.58
TP43651	2U	30.26
TP26449	2U	30.26
TP25498	2U	31.97
TP19230	2U	32.64
TP12871	2U	32.98
TP31354	2U	33.99
TP24004	2U	36.08
TP30950	2U	36.08
TP13071	2U	36.08
TP29886	2U	36.42
TP38248	2U	37.1
TP16144	2U	37.79
TP13047	2U	37.79
TP35920	2U	37.79
TP19294	2U	37.79
TP25431	2U	37.79
TP30050	2U	37.79
TP39302	2U	37.79
TP28923	2U	37.79
TP38954	2U	37.79
TP2172	2U	37.79
TP29346	2U	37.79
TP31734	2U	37.79
TP24370	2U	37.79
TP20595	2U	37.79
TP10199	2U	37.79
TP31948	2U	37.79
TP18076	2U	37.79
TP37614	2U	37.79
TP25819	2U	37.79
TP13089	2U	37.79
TP27016	2U	37.79
TP22159	2U	37.79
TP45848	2U	38.14
TP1184	2U	38.14
TP22089	2U	38.14
TP32063	2U	38.14
TP12109	2U	38.14
TP23484	2U	38.5
TP20694	2U	38.5
TP21392	2U	38.5
TP18765	2U	38.5
TP28305	2U	39.56
TP31481	2U	39.9
TP42139	2U	40.24
TP45490	2U	40.24
TP40346	2U	40.24
TP12713	2U	40.24
TP19076	2U	40.6
TP18974	2U	42.7
TP5211	2U	42.7
TP42253	2U	42.7
TP36189	2U	42.7
TP3250	2U	42.7
TP573	2U	42.7
TP595	2U	44.22
TP45600	2U	44.22
TP43349	2U	44.22
TP34451	2U	44.22
TP35507	2U	44.22
TP31339	2U	44.22
TP21286	2U	44.58
TP25701	2U	44.58
TP16009	2U	44.58
TP30550	2U	44.58
TP943	2U	45.59
TP12746	2U	46.27
TP30287	2U	46.27
TP488	2U	46.27
TP489	2U	46.27
TP41513	2U	46.61
TP24673	2U	46.61
TP4987	2U	50.12
TP16431	2U	50.48
TP14664	2U	50.83
TP22	2U	51.16
TP22229	2U	51.16
TP41737	2U	51.5
TP27789	2U	52.57
TP6568	2U	52.93
TP18121	2U	52.93
TP16474	2U	53.28
TP21890	2U	54.35
TP43412	2U	54.35
TP5337	2U	54.35
TP8445	2U	54.7
TP12130	2U	55.04
TP36452	2U	55.41
TP10521	2U	55.41
TP40311	2U	55.41
TP4849	2U	56.08
TP2188	2U	56.42
TP29694	2U	56.42
TP19840	2U	56.76
TP31748	2U	59.14
TP45491	2U	60.83
TP23781	2U	61.18
TP23662	2U	61.88
TP18565	2U	61.88
TP34661	2U	61.88
TP39881	2U	61.88
TP23578	2U	61.88
TP12043	2U	61.88
TP43698	2U	62.92
TP20866	2U	62.92
TP9838	2U	62.92
TP35045	2U	63.28
TP7388	2U	64.74
TP31007	2U	65.09
TP25447	2U	65.44
TP32294	2U	65.44
TP17503	2U	66.81
TP14375	2U	68.18
TP30228	2U	69.2
TP22284	2U	69.88
TP18602	2U	71.24
TP26460	2U	71.58
TP10318	2U	75.35
TP8636	2U	75.69
TP30418	2U	76.04
TP18171	2U	76.04
TP14531	2U	76.04
TP42612	2U	78.49
TP33780	2U	78.49
TP27197	2U	80.18
TP24045	2U	81.21
TP32284	2U	81.21
TP44300	2U	81.9
TP33886	2U	86.2
TP4882	2U	86.89
TP40070	2U	87.23
TP39549	2U	87.23
TP25830	2U	87.9
TP9779	2U	95.31
TP11570	2U	96.7
TP37258	2U	100.21
TP12420	2U	101.57
TP14839	2U	101.57
TP18034	2U	101.91
TP33696	2U	102.62
TP38532	2U	103.33
TP35357	2U	103.68
TP41232	2U	104.02
TP46046	2U	104.02
TP37056	2U	105.04
TP32254	2U	105.38
TP17458	2U	105.38
TP20220	2U	105.38
TP5409	2U	105.38
TP40763	2U	105.38
TP2131	2U	105.72
TP36793	2U	105.72
TP30637	2U	106.06
TP45163	2U	106.06
TP39268	2U	107.07
TP5795	2U	107.41
TP35720	2U	108.46
TP40766	2U	108.46
TP21351	2U	108.81
TP24710	2U	109.82
TP26411	2U	115.17
TP1654	2U	119.81
TP3319	2U	120.48
TP22314	2U	120.83
TP18184	2U	121.55
TP35369	2U	121.55
TP3870	2U	121.88
TP21486	2U	122.56
TP40205	2U	122.56
TP44258	2U	122.91
TP32353	2U	123.27
TP21011	2U	126.05
TP2684	2U	129.83
TP18725	2U	131.2
TP35444	2U	131.9
TP44019	2U	131.9
TP14020	2U	131.9
TP32602	2U	132.6
TP23914	2U	133.29
TP2550	3U	0
TP39569	3U	4.79
TP13664	3U	8.85
TP35987	3U	11.6
TP42981	3U	15.46
TP3446	3U	16.15
TP4445	3U	16.15
TP21937	3U	17.63
TP28703	3U	19.07
TP30435	3U	20.86
TP40356	3U	24.86
TP11719	3U	25.6
TP19504	3U	25.6
TP243	3U	25.6
TP43367	3U	25.6
TP38860	3U	25.6
TP44670	3U	25.96
TP11981	3U	28.52
TP3282	3U	32.03
TP2971	3U	34.8
TP37040	3U	34.8
TP23467	3U	35.16
TP12309	3U	35.52
TP9980	3U	35.9
TP38077	3U	35.9
TP33324	3U	35.9
TP37004	3U	35.9
TP6416	3U	35.9
TP29559	3U	36.25
TP21958	3U	37.01
TP4857	3U	37.01
TP32186	3U	37.36
TP6966	3U	37.36
TP3027	3U	37.36
TP10032	3U	37.36
TP32109	3U	37.36
TP18495	3U	37.7
TP42116	3U	37.7
TP5864	3U	37.7
TP20503	3U	37.7
TP10678	3U	37.7
TP18036	3U	38.05
TP25084	3U	38.05
TP36639	3U	38.05
TP3278	3U	38.05
TP19568	3U	38.05
TP4720	3U	39.43
TP33544	3U	39.43
TP31415	3U	40.13
TP18086	3U	41.86
TP30183	3U	42.19
TP3736	3U	42.53
TP3255	3U	42.87
TP5388	3U	43.21
TP23451	3U	43.54
TP922	3U	44.22
TP39263	3U	44.22
TP33295	3U	44.22
TP13092	3U	44.22
TP43604	3U	45.23
TP5767	3U	45.91
TP35948	3U	46.63
TP31164	3U	47.36
TP4307	3U	47.36
TP33799	3U	48.04
TP13401	3U	49.74
TP39387	3U	50.07
TP4808	3U	50.42
TP7472	3U	50.42
TP5765	3U	50.8
TP32252	3U	50.8
TP12824	3U	51.53
TP20213	3U	51.88
TP30095	3U	51.88
TP14381	3U	51.88
TP24110	3U	51.88
TP3571	3U	51.88
TP34421	3U	51.88
TP13927	3U	51.88
TP35516	3U	51.88
TP18246	3U	51.88
TP30778	3U	52.23
TP561	3U	52.98
TP21065	3U	53.71
TP26490	3U	54.41
TP8720	3U	54.75
TP26327	3U	57.83
TP33617	3U	57.83
TP9669	3U	58.16
TP18591	3U	59.18
TP13169	3U	59.85
TP18481	3U	59.85
TP27293	3U	59.85
TP44920	3U	59.85
TP21814	3U	59.85
TP6525	3U	59.85
TP18350	3U	59.85
TP30817	3U	59.85
TP19592	3U	59.85
TP40599	3U	59.85
TP38950	3U	59.85
TP32954	3U	60.21
TP20088	3U	61.23
TP24153	3U	61.23
TP31977	3U	61.23
TP5698	3U	61.58
TP42654	3U	63.63
TP33730	3U	63.63
TP25722	3U	63.63
TP22271	3U	64.64
TP32865	3U	66.04
TP21640	3U	66.74
TP4355	3U	66.74
TP23478	3U	67.77
TP27599	3U	67.77
TP31798	3U	68.11
TP39218	3U	68.45
TP15986	3U	68.8
TP3392	3U	69.15
TP39626	3U	70.18
TP7943	3U	70.18
TP27773	3U	70.88
TP39212	3U	70.88
TP5069	3U	70.88
TP13486	3U	71.58
TP13438	3U	72.27
TP18742	3U	74.34
TP34258	3U	74.34
TP18595	3U	74.68
TP30703	3U	74.68
TP1597	3U	75.02
TP30238	3U	75.71
TP9994	3U	75.71
TP22515	3U	76.05
TP29976	3U	76.05
TP42955	3U	76.39
TP42074	3U	76.73
TP33756	3U	80.53
TP18618	3U	81.55
TP24506	3U	82.91
TP8727	3U	83.58
TP5712	3U	84.26
TP30728	3U	86.32
TP40926	3U	87.35
TP21788	3U	89.73
TP1134	3U	89.73
TP5442	3U	89.73
TP31710	3U	89.73
TP32690	3U	91.43
TP35043	3U	92.46
TP27588	3U	93.48
TP43892	3U	94.52
TP28327	3U	94.52
TP27943	3U	96.82
TP26301	3U	97.18
TP29945	3U	98.22
TP31245	3U	98.22
TP37444	3U	98.22
TP25056	3U	99.59
TP33055	3U	99.59
TP11708	3U	100.95
TP41093	3U	102.65
TP29095	3U	102.65
TP22240	3U	102.65
TP11763	3U	104.46
TP4959	3U	105.13
TP39184	3U	105.13
TP26781	3U	106.83
TP6418	3U	107.16
TP4278	3U	107.16
TP4405	3U	107.16
TP30928	3U	107.5
TP15623	3U	108.21
TP23351	3U	109.3
TP148	3U	110.73
TP41821	3U	110.73
TP1529	3U	110.73
TP6830	3U	110.73
TP13746	3U	111.45
TP45243	3U	111.81
TP37542	3U	111.81
TP26124	3U	111.81
TP24748	3U	113.88
TP32018	3U	113.88
TP7785	3U	115.68
TP13128	3U	116.4
TP717	3U	119.4
TP4194	3U	120.56
TP16472	3U	121.29
TP25821	3U	121.29
TP7226	3U	122.33
TP24486	3U	122.69
TP35675	3U	122.69
TP16874	3U	122.69
TP19083	3U	122.69
TP39602	3U	122.69
TP965	3U	122.69
TP37436	3U	122.69
TP21569	3U	123.03
TP28127	3U	123.72
TP3469	3U	124.45
TP5964	3U	128.07
TP46128	3U	129.44
TP23280	3U	130.11
TP4492	3U	131.12
TP13666	3U	131.12
TP4546	3U	131.85
TP2925	3U	133.42
TP31006	3U	134.21
TP16819	3U	134.21
TP27033	3U	135.7
TP31070	3U	137.97
TP18988	4U	0
TP38400	4U	3.29
TP42514	4U	3.65
TP14166	4U	3.99
TP22238	4U	4.33
TP5999	4U	5.34
TP3012	4U	5.69
TP8685	4U	6.38
TP5008	4U	8.08
TP1273	4U	10.13
TP36020	4U	10.47
TP18475	4U	11.51
TP28234	4U	11.85
TP4651	4U	11.85
TP24658	4U	11.85
TP12602	4U	12.19
TP41057	4U	15.62
TP26623	4U	15.95
TP22308	4U	20.98
TP35158	4U	23.46
TP40304	4U	23.46
TP14905	4U	24.84
TP44029	4U	25.19
TP43303	4U	26.93
TP42321	4U	30.78
TP3218	4U	30.78
TP40735	4U	34.6
TP18223	4U	38.04
TP28337	4U	38.04
TP23501	4U	38.38
TP21842	4U	38.72
TP41495	4U	41.85
TP23039	4U	42.19
TP29786	4U	42.87
TP4876	4U	43.21
TP6833	4U	43.21
TP16642	4U	43.21
TP1640	4U	43.21
TP25024	4U	43.21
TP41736	4U	43.56
TP43571	4U	43.56
TP33798	4U	43.92
TP42937	4U	43.92
TP18600	4U	43.92
TP1359	4U	44.61
TP31999	4U	44.61
TP45162	4U	44.61
TP38148	4U	44.61
TP1513	4U	45.29
TP9174	4U	45.29
TP30467	4U	45.29
TP1428	4U	45.29
TP38417	4U	45.63
TP31258	4U	46.31
TP26737	4U	46.99
TP28325	4U	46.99
TP13685	4U	46.99
TP3389	4U	46.99
TP27230	4U	48.34
TP30130	4U	49.4
TP19982	4U	49.76
TP13651	4U	49.76
TP38289	4U	51.13
TP43862	4U	55.33
TP22040	4U	58.07
TP26729	4U	59.15
TP20853	4U	61.01
TP2036	4U	61.01
TP36147	4U	61.35
TP16215	4U	62.03
TP12438	4U	62.37
TP18840	4U	64.06
TP27321	4U	64.73
TP3375	4U	64.73
TP27273	4U	66.15
TP42839	4U	66.15
TP31307	4U	66.5
TP13141	4U	67.54
TP168	4U	67.54
TP22520	4U	67.9
TP23613	4U	68.25
TP2489	4U	70.3
TP37566	4U	70.98
TP5613	4U	71.32
TP40756	4U	72.01
TP25965	4U	73.37
TP37352	4U	73.37
TP14500	4U	73.71
TP25026	4U	73.71
TP3960	4U	74.4
TP45836	4U	74.74
TP18217	4U	75.43
TP32730	4U	76.11
TP22235	4U	76.11
TP46090	4U	79.96
TP5704	4U	82.72
TP19287	4U	86.9
TP74	4U	96.45
TP22029	4U	101.05
TP37829	4U	101.05
TP14177	4U	101.73
TP21688	4U	102.06
TP18703	4U	102.4
TP16598	4U	102.74
TP8090	4U	104.77
TP2888	4U	104.77
TP30816	4U	105.78
TP43956	4U	107.14
TP31228	4U	108.15
TP40806	4U	108.15
TP43851	4U	108.83
TP18420	4U	109.17
TP706	4U	109.84
TP16405	4U	111.54
TP11932	4U	112.21
TP3521	4U	112.9
TP13320	4U	113.26
TP23830	4U	113.62
TP3409	4U	117.47
TP20864	4U	118.91
TP3697	4U	120.38
TP28098	4U	122.14
TP6193	4U	123.2
TP35399	4U	124.61
TP17779	4U	125.29
TP18471	4U	127.07
TP7006	4U	127.77
TP45723	4U	128.47
TP27957	4U	129.53
TP30149	4U	131.32
TP4569	4U	132.39
TP4570	4U	132.39
TP5805	4U	136.57
TP38065	4U	137.25
TP35281	4U	137.25
TP26255	4U	137.61
TP28945	4U	139.49
TP32594	4U	139.84
TP35826	4U	140.18
TP37461	4U	140.18
TP44849	4U	140.18
TP3244	4U	140.18
TP25891	4U	141.66
TP32022	4U	142.37
TP20425	4U	143.75
TP36486	4U	144.1
TP23259	4U	144.45
TP22167	4U	145.86
TP18416	4U	146.2
TP3854	4U	146.2
TP18415	4U	146.2
TP25349	4U	148.65
TP39455	4U	150.36
TP743	4U	151.75
TP21078	4U	152.79
TP13116	4U	153.48
TP37134	4U	154.16
TP42683	4U	154.52
TP16005	4U	154.87
TP12251	4U	154.87
TP14514	4U	156.58
TP3383	5U	0
TP10195	5U	0.68
TP30661	5U	1.35
TP5778	5U	4.13
TP10212	5U	4.48
TP30534	5U	4.48
TP22960	5U	4.48
TP9916	5U	11.19
TP4322	5U	14.3
TP7495	5U	25.04
TP17343	5U	32.67
TP18981	5U	34.04
TP1453	5U	35.74
TP2834	5U	38.12
TP4426	5U	38.81
TP15652	5U	39.5
TP25506	5U	42.25
TP2244	5U	42.25
TP39916	5U	42.25
TP15500	5U	43.64
TP23942	5U	43.64
TP1773	5U	44.37
TP5967	5U	45.11
TP12037	5U	45.11
TP40558	5U	45.82
TP895	5U	46.51
TP26867	5U	47.53
TP42390	5U	47.53
TP37238	5U	47.53
TP11508	5U	48.89
TP5178	5U	48.89
TP13102	5U	48.89
TP29076	5U	51.08
TP22010	5U	51.44
TP23946	5U	51.81
TP12556	5U	52.16
TP11086	5U	52.16
TP24821	5U	52.16
TP26579	5U	52.16
TP28187	5U	53.19
TP16796	5U	53.53
TP18169	5U	54.22
TP43627	5U	55.27
TP29129	5U	56.32
TP22207	5U	56.32
TP29779	5U	57.02
TP31687	5U	57.02
TP2915	5U	57.02
TP13819	5U	57.02
TP22647	5U	57.02
TP11823	5U	57.02
TP4025	5U	57.02
TP2444	5U	57.02
TP6690	5U	57.02
TP371	5U	57.02
TP6003	5U	57.36
TP36089	5U	57.7
TP45004	5U	58.05
TP10237	5U	58.05
TP4730	5U	58.41
TP13395	5U	58.78
TP37297	5U	58.78
TP45823	5U	58.78
TP1733	5U	58.78
TP16643	5U	58.78
TP39360	5U	58.78
TP32040	5U	58.78
TP7851	5U	59.12
TP14978	5U	59.12
TP39806	5U	59.12
TP35086	5U	62.76
TP25078	5U	63.45
TP22529	5U	64.14
TP39086	5U	64.48
TP1561	5U	66.56
TP37418	5U	66.91
TP43564	5U	67.25
TP19730	5U	67.25
TP6395	5U	68.62
TP36688	5U	70.34
TP8660	5U	70.68
TP17849	5U	71.01
TP46232	5U	71.74
TP12158	5U	74.08
TP39120	5U	75.99
TP12743	5U	76.69
TP20095	5U	77.03
TP23945	5U	77.36
TP33118	5U	79.06
TP2492	5U	80.75
TP6302	5U	83.48
TP28646	5U	83.83
TP4317	5U	83.83
TP25479	5U	83.83
TP36164	5U	84.55
TP35298	5U	86
TP12666	5U	86
TP26326	5U	86
TP28616	5U	86
TP33990	5U	86.35
TP42721	5U	86.69
TP20233	5U	87.03
TP44928	5U	87.03
TP27428	5U	87.37
TP8466	5U	88.05
TP1659	5U	89.75
TP24412	5U	92.13
TP11653	5U	93.83
TP9917	5U	94.17
TP40095	5U	95.87
TP16419	5U	97.58
TP13572	5U	98.26
TP25385	5U	99.99
TP1380	5U	99.99
TP20070	5U	101.02
TP6069	5U	103.43
TP30863	5U	103.77
TP26588	5U	103.77
TP39470	5U	103.77
TP43138	5U	104.12
TP12321	5U	104.79
TP11729	5U	106.83
TP28109	5U	107.16
TP20783	5U	107.85
TP2264	5U	108.22
TP5677	5U	108.95
TP7986	5U	109.65
TP24749	5U	109.99
TP32107	5U	110.33
TP40701	5U	111.36
TP26482	5U	112.73
TP30634	5U	112.73
TP32654	5U	113.42
TP1070	5U	114.79
TP26674	5U	115.51
TP11125	5U	115.88
TP41246	5U	116.57
TP28348	5U	116.57
TP14795	5U	119.38
TP44792	5U	119.72
TP5364	5U	120.07
TP6711	5U	120.43
TP43184	5U	120.43
TP36988	5U	120.77
TP14159	5U	121.45
TP39800	5U	121.45
TP4997	5U	122.12
TP46150	5U	125.22
TP39296	5U	125.9
TP792	5U	128.68
TP20947	5U	129.03
TP21035	5U	129.73
TP26375	5U	130.46
TP2194	5U	131.18
TP39173	5U	131.88
TP41256	5U	131.88
TP44626	5U	131.88
TP39700	5U	131.88
TP16126	5U	132.57
TP18426	5U	132.91
TP22189	5U	132.91
TP27382	5U	132.91
TP26401	5U	133.58
TP40508	5U	135.98
TP5391	5U	136.32
TP10642	5U	137.34
TP22431	5U	137.69
TP1860	5U	137.69
TP7492	5U	137.69
TP11426	5U	138.79
TP12529	5U	139.16
TP28594	5U	139.52
TP35836	5U	139.52
TP9648	5U	139.87
TP4444	5U	140.22
TP14331	5U	140.56
TP43798	5U	141.92
TP6284	5U	143.28
TP21527	5U	144.64
TP38721	5U	144.64
TP14053	5U	144.64
TP20203	5U	144.64
TP10756	5U	147.12
TP3338	5U	147.12
TP6453	5U	147.12
TP5098	5U	147.12
TP26980	5U	147.47
TP32354	5U	147.81
TP29908	5U	147.81
TP7735	5U	148.84
TP3827	5U	148.84
TP38379	5U	148.84
TP3189	5U	149.53
TP39333	5U	149.87
TP33093	5U	151.29
TP15807	5U	152.68
TP36397	5U	153.04
TP45046	5U	153.4
TP30960	5U	154.41
TP46155	5U	157.14
TP39790	5U	157.86
TP3964	5U	160.09
TP29438	5U	160.44
TP18484	5U	160.44
TP23870	5U	160.79
TP44715	5U	162.14
TP35868	5U	163.16
TP14291	5U	163.5
TP11092	5U	163.83
TP16841	5U	165.53
TP40913	5U	165.53
TP1855	5U	166.22
TP33112	5U	166.56
TP30792	5U	168.3
TP39595	5U	168.66
TP17151	5U	168.66
TP5880	5U	169.02
TP18729	5U	170.78
TP39795	5U	170.78
TP5133	5U	170.78
TP1644	5U	171.48
TP13103	5U	171.48
TP9738	5U	172.51
TP9567	5U	173.2
TP38637	5U	173.55
TP41647	5U	173.55
TP17277	5U	174.92
TP43082	5U	175.27
TP7657	5U	177.95
TP38772	5U	177.95
TP40730	5U	178.3
TP43759	5U	179.37
TP23035	5U	179.37
TP35956	5U	179.37
TP33688	5U	179.37
TP8481	5U	179.37
TP19665	5U	179.37
TP24232	5U	179.37
TP26853	5U	179.37
TP19600	5U	179.71
TP12565	5U	179.71
TP16459	5U	180.83
TP35962	5U	181.19
TP2549	5U	181.54
TP43325	5U	182.57
TP7176	5U	184.33
TP19180	5U	184.68
TP40615	5U	184.68
TP7922	5U	184.68
TP22000	5U	185.02
TP32568	5U	186.37
TP21537	5U	187.06
TP29152	6U	0
TP20086	6U	11.73
TP22705	6U	15.65
TP21866	6U	17.74
TP18573	6U	22.29
TP34725	6U	23.32
TP35897	6U	23.66
TP11529	6U	23.66
TP22097	6U	24.38
TP13648	6U	26.76
TP43018	6U	30.23
TP29084	6U	32.66
TP25648	6U	32.66
TP12690	6U	32.66
TP26046	6U	33.68
TP41684	6U	35.71
TP11277	6U	37.76
TP40678	6U	37.76
TP26018	6U	38.45
TP44885	6U	39.13
TP36315	6U	40.14
TP39862	6U	41.93
TP21606	6U	42.65
TP45855	6U	42.99
TP5802	6U	44.8
TP15856	6U	45.16
TP7427	6U	45.16
TP45529	6U	51.88
TP6300	6U	54.26
TP37855	6U	54.26
TP11741	6U	54.26
TP33386	6U	54.62
TP39490	6U	56.11
TP3852	6U	56.11
TP5946	6U	56.11
TP41718	6U	56.84
TP7845	6U	57.94
TP45871	6U	58.62
TP24036	6U	58.62
TP25340	6U	58.62
TP12185	6U	58.62
TP31629	6U	58.96
TP2173	6U	58.96
TP9715	6U	58.96
TP9889	6U	58.96
TP1180	6U	58.96
TP3841	6U	58.96
TP11937	6U	58.96
TP36847	6U	59.99
TP21520	6U	59.99
TP12969	6U	61.06
TP11292	6U	61.41
TP24215	6U	62.43
TP32131	6U	62.43
TP6246	6U	63.13
TP46106	6U	63.48
TP13647	6U	63.82
TP35014	6U	64.52
TP12404	6U	64.52
TP6333	6U	64.52
TP15516	6U	64.52
TP11967	6U	65.2
TP991	6U	65.2
TP4207	6U	65.2
TP32013	6U	65.2
TP18142	6U	65.54
TP41177	6U	65.54
TP9257	6U	65.54
TP32918	6U	65.54
TP46058	6U	65.54
TP43283	6U	65.54
TP42126	6U	65.54
TP42960	6U	65.88
TP3759	6U	65.88
TP2657	6U	65.88
TP10219	6U	65.88
TP10588	6U	65.88
TP17056	6U	65.88
TP42565	6U	65.88
TP12104	6U	65.88
TP34281	6U	65.88
TP17886	6U	65.88
TP25939	6U	65.88
TP3336	6U	65.88
TP38777	6U	65.88
TP8299	6U	65.88
TP24754	6U	65.88
TP30881	6U	65.88
TP17171	6U	65.88
TP41830	6U	65.88
TP5791	6U	65.88
TP31703	6U	65.88
TP36661	6U	65.88
TP10856	6U	65.88
TP36745	6U	65.88
TP14861	6U	65.88
TP16213	6U	65.88
0 TP10080	6U	65.88
1 TP42685	6U	65.88
2 TP29413	6U	65.88
3 TP37050	6U	65.88
TP2056	6U	66.24
TP1332	6U	66.24
TP7529	6U	66.6
TP18767	6U	66.6
TP27478	6U	66.6
TP9718	6U	66.6
TP3678	6U	66.6
TP2345	6U	66.6
TP14602	6U	66.6
4 TP6325	6U	66.94
5 TP20829	6U	66.94
6 TP9955	6U	66.94
7 TP14252	6U	66.94
8 TP4502	6U	66.94
9 TP28372	6U	66.94
0 TP34310	6U	66.94
1 TP20263	6U	66.94
2 TP14745	6U	66.94
3 TP41990	6U	66.94
4 TP29718	6U	66.94
5 TP5093	6U	67.29
6 TP19666	6U	67.64
7 TP94	6U	67.64
8 TP3858	6U	67.98
9 TP41442	6U	67.98
0 TP22080	6U	67.98
2 TP27102	6U	69.67
1 TP18163	6U	70.01
7 TP17478	6U	72.07
3 TP44296	6U	72.41
4 TP37233	6U	72.41
5 TP9328	6U	72.41
6 TP30963	6U	72.41
8 TP36225	6U	73.09
9 TP19943	6U	74.78
0 TP28393	6U	78.54
1 TP44565	6U	78.88
2 TP18646	6U	79.57
3 TP39861	6U	80.63
4 TP38364	6U	83.81
5 TP20178	6U	84.15
6 TP19010	6U	84.5
7 TP3864	6U	84.5
8 TP19196	6U	84.83
9 TP21089	6U	86.9
0 TP33813	6U	88.01
1 TP26050	6U	89.15
2 TP26982	6U	89.51
3 TP1151	6U	89.51
4 TP15690	6U	90.52
5 TP42219	6U	90.52
6 TP7871	6U	91.21
7 TP28453	6U	92.32
8 TP12200	6U	95.34
9 TP35354	6U	95.34
0 TP39932	6U	95.34
1 TP31062	6U	95.68
2 TP11340	6U	97.04
3 TP14203	6U	97.38
4 TP1451	6U	98.06
5 TP25853	6U	99.09
6 TP10596	6U	99.09
7 TP15481	6U	99.43
8 TP18878	6U	100.48
9 TP41277	6U	101.18
0 TP1038	6U	103.28
1 TP5399	6U	103.62
2 TP36687	6U	103.62
3 TP41435	6U	105.69
4 TP13183	6U	108.79
6 TP36713	6U	110.14
5 TP14578	6U	110.48
7 TP41157	6U	110.82
8 TP42513	6U	111.18
9 TP31353	6U	112.63
0 TP18138	6U	112.63
1 TP27098	6U	114.7
2 TP13198	6U	115.04
3 TP16377	6U	116.44
4 TP26526	6U	119.26
7 TP43748	6U	123.85
5 TP33972	6U	124.19
6 TP6234	6U	124.19
8 TP31872	6U	124.9
9 TP38091	6U	126.63
0 TP28272	6U	127.35
1 TP3833	6U	128.05
2 TP20733	7U	0
3 TP21682	7U	4.52
4 TP20107	7U	5.63
5 TP12532	7U	6.33
6 TP35063	7U	8.43
7 TP30197	7U	8.77
8 TP3730	7U	8.77
9 TP21544	7U	10.19
0 TP5744	7U	10.89
1 TP30976	7U	11.95
2 TP22660	7U	13.33
3 TP10476	7U	14.35
4 TP31965	7U	14.68
5 TP25672	7U	15.36
6 TP30834	7U	16.03
7 TP18901	7U	16.03
8 TP40107	7U	16.03
9 TP12003	7U	16.03
0 TP44228	7U	19.49
1 TP24064	7U	22.97
2 TP34096	7U	22.97
3 TP2756	7U	22.97
4 TP41343	7U	22.97
5 TP27228	7U	22.97
6 TP31907	7U	22.97
7 TP238	7U	22.97
8 TP32450	7U	22.97
2 TP9935	7U	23.31
3 TP17367	7U	23.31
9 TP31240	7U	23.66
0 TP8954	7U	23.66
1 TP31093	7U	23.66
2 TP1334	7U	23.66
3 TP15067	7U	23.66
4 TP39914	7U	23.66
5 TP38603	7U	23.66
6 TP37946	7U	23.66
7 TP28972	7U	23.66
8 TP28209	7U	23.66
9 TP45056	7U	23.66
0 TP17957	7U	23.66
1 TP8759	7U	23.66
4 TP16392	7U	24.01
5 TP36792	7U	24.01
6 TP12385	7U	24.01
7 TP2472	7U	24.01
8 TP27594	7U	24.01
9 TP9938	7U	24.01
0 TP9734	7U	24.01
1 TP45798	7U	24.01
2 TP216	7U	24.01
3 TP36374	7U	24.01
4 TP29448	7U	24.01
5 TP31856	7U	24.01
6 TP26057	7U	24.01
7 TP38902	7U	24.01
8 TP21804	7U	24.01
9 TP32587	7U	24.01
0 TP28930	7U	24.01
1 TP20384	7U	24.01
2 TP25410	7U	24.01
3 TP37020	7U	24.01
4 TP23585	7U	24.01
5 TP20061	7U	24.01
6 TP29794	7U	24.01
7 TP29419	7U	24.01
3 TP44879	7U	24.7
4 TP13966	7U	25.05
5 TP14209	7U	25.05
6 TP41112	7U	25.05
7 TP33950	7U	25.05
8 TP18063	7U	25.05
9 TP20275	7U	25.05
0 TP39722	7U	25.05
1 TP24637	7U	25.05
2 TP19748	7U	25.05
8 TP16209	7U	25.41
9 TP1152	7U	25.41
3 TP26550	7U	27.84
0 TP37292	7U	28.18
1 TP14971	7U	28.18
2 TP23660	7U	28.18
4 TP12539	7U	28.52
5 TP12451	7U	28.52
6 TP7233	7U	28.52
7 TP27110	7U	29.61
8 TP8946	7U	29.97
9 TP11864	7U	32.01
0 TP45440	7U	32.01
1 TP27965	7U	32.68
2 TP38457	7U	32.68
3 TP22268	7U	32.68
4 TP27095	7U	32.68
5 TP32575	7U	35.76
6 TP3454	7U	36.1
8 TP16007	7U	37.15
7 TP8971	7U	37.49
9 TP6949	7U	37.84
0 TP11392	7U	38.91
1 TP16400	7U	39.62
2 TP31348	7U	39.97
3 TP37193	7U	41.83
4 TP21050	7U	42.94
5 TP31174	7U	42.94
6 TP26407	7U	42.94
7 TP32538	7U	43.29
8 TP36528	7U	45.52
9 TP36116	7U	47.72
0 TP12732	7U	49.93
1 TP10422	7U	51.8
2 TP6251	7U	52.15
3 TP7223	7U	52.84
4 TP44788	7U	52.84
5 TP13877	7U	52.84
6 TP30934	7U	53.17
7 TP37725	7U	54.92
8 TP33638	7U	55.62
9 TP37366	7U	56.33
0 TP2167	7U	57.39
1 TP29683	7U	59.49
3 TP21806	7U	61.19
2 TP28836	7U	61.53
4 TP13931	7U	62.2
5 TP16395	7U	62.2
6 TP32115	7U	62.88
7 TP29572	7U	63.57
8 TP4202	7U	63.57
9 TP33013	7U	63.91
0 TP31079	7U	63.91
1 TP4330	7U	63.91
2 TP4724	7U	63.91
3 TP28613	7U	64.25
4 TP1530	7U	66.08
5 TP34438	7U	66.08
6 TP17091	7U	66.08
7 TP32447	7U	66.42
8 TP39034	7U	66.76
9 TP33262	7U	67.1
0 TP22568	7U	68.13
1 TP44916	7U	68.13
2 TP25689	7U	69.15
3 TP9338	7U	69.15
4 TP5229	7U	70.22
5 TP6492	7U	70.22
6 TP25504	7U	70.22
7 TP26953	7U	70.91
8 TP16748	7U	70.91
9 TP16300	7U	71.25
0 TP11475	7U	71.25
1 TP22573	7U	71.59
2 TP30910	7U	71.59
3 TP14948	7U	71.93
4 TP38649	7U	71.93
5 TP21248	7U	71.93
6 TP35954	7U	71.93
7 TP6394	7U	71.93
8 TP31869	7U	71.93
9 TP6379	7U	71.93
0 TP5317	7U	72.28
1 TP15276	7U	72.28
2 TP33221	7U	72.65
3 TP12638	7U	74.91
4 TP45227	7U	74.91
5 TP23892	7U	74.91
6 TP26237	7U	74.91
7 TP25451	7U	75.25
8 TP32099	7U	75.25
9 TP6398	7U	75.25
0 TP42982	7U	75.25
1 TP10250	7U	75.25
2 TP21824	7U	75.59
3 TP15953	7U	75.59
4 TP1609	7U	75.59
5 TP4072	7U	75.59
6 TP4739	7U	75.59
7 TP33702	7U	75.59
8 TP28891	7U	75.59
9 TP34879	7U	76.97
0 TP44871	7U	77.65
1 TP10649	7U	77.99
2 TP4439	7U	77.99
3 TP29986	7U	77.99
4 TP45241	7U	79.41
5 TP34857	7U	80.12
6 TP12480	7U	80.12
7 TP25145	7U	80.12
8 TP23289	7U	80.48
9 TP7677	7U	80.84
0 TP39327	7U	80.84
1 TP19150	7U	80.84
2 TP43265	7U	80.84
3 TP42932	7U	81.2
4 TP117	7U	81.54
5 TP43601	7U	81.9
6 TP37801	7U	81.9
7 TP11303	7U	81.9
8 TP19546	7U	81.9
9 TP28242	7U	82.6
0 TP25138	7U	82.6
1 TP38626	7U	83.99
2 TP20219	7U	86.4
3 TP5303	7U	87.44
4 TP27504	7U	88.86
5 TP19723	7U	88.86
6 TP37818	7U	89.94
7 TP43443	7U	89.94
8 TP36196	7U	90.32
9 TP43459	7U	90.67
0 TP5366	7U	91.02
1 TP41971	7U	91.02
2 TP4517	7U	91.02
3 TP12471	7U	91.02
4 TP6029	7U	91.38
5 TP9465	7U	91.38
6 TP31417	7U	92.1
7 TP2263	7U	93.17
8 TP2092	7U	93.87
9 TP41171	7U	94.22
0 TP1280	7U	94.56
1 TP29785	7U	94.9
2 TP45380	7U	94.9
5 TP1741	7U	96.96
3 TP37431	7U	97.33
4 TP21262	7U	97.33
6 TP12305	7U	97.68
7 TP32376	7U	98.39
8 TP30266	7U	100.43
9 TP30428	7U	101.78
0 TP35047	7U	102.11
2 TP31479	7U	103.13
1 TP20010	7U	103.46
3 TP412	7U	104.14
7 TP9453	7U	105.17
4 TP43199	7U	105.51
5 TP33489	7U	105.51
6 TP11441	7U	105.51
8 TP23033	7U	105.84
9 TP6013	7U	108.61
0 TP27097	7U	109.98
1 TP42465	7U	109.98
2 TP6523	7U	111.06
3 TP31051	7U	122.89
4 TP28959	7U	123.9
5 TP28149	7U	126.97
6 TP24573	7U	128.32
7 TP36856	7U	129
8 TP40743	7U	129
9 TP5939	7U	129
0 TP13844	7U	129.68
1 TP35816	7U	130.7
3 TP29444	7U	132.41
4 TP21530	7U	133.09
5 TP44531	7U	133.42
2 TP34130	7U	133.76
6 TP6044	7U	134.1
7 TP39792	7U	134.45
8 TP42281	7U	136.62
9 TP12018	7U	140.42
0 TP3224	7U	140.42
1 TP21447	7U	140.76
4 TP29732	7U	142.82
5 TP45565	7U	142.82
2 TP32707	7U	143.17
3 TP18485	7U	143.17
6 TP37687	7U	143.5
7 TP3672	7U	143.86
8 TP86	7U	145.65
9 TP8943	7U	146
0 TP38336	7U	146.72
1 TP35392	7U	147.08
2 TP20530	7U	148.84
3 TP16424	7U	149.88
4 TP42393	7U	149.88
5 TP14670	7U	149.88
6 TP25933	7U	150.91
7 TP30872	7U	151.59
8 TP17591	7U	151.94
9 TP3200	7U	153.01
0 TP25080	7U	153.01
1 TP34863	7U	154.05
2 TP2316	7U	154.05
3 TP43134	7U	154.05
4 TP9472	7U	154.73
5 TP7129	7U	156.09
6 TP38113	7U	156.09
7 TP11045	7U	156.76
8 TP33670	7U	157.1
9 TP26734	7U	157.1
0 TP10434	7U	157.45
1 TP7089	7U	157.45
2 TP28697	7U	157.45
3 TP34193	7U	157.45
4 TP38767	7U	157.45
5 TP34067	7U	157.45
6 TP40283	7U	157.45
7 TP6943	7U	157.45
8 TP32220	7U	157.45
9 TP34889	7U	159.52
4 TP2575	7U	162.41
3 TP18556	7U	163.84
0 TP4691	7U	164.54
1 TP28585	7U	164.54
0 TP7646	7U	165.28
1 TP30793	7U	166
5 TP30607	7U	166.68
6 TP21859	7U	166.68
7 TP11877	7U	166.68
8 TP38756	7U	166.68
9 TP33918	7U	166.68
2 TP15036	7U	167.04
2 TP29668	7U	169.65
