# Supplementary material for: Genotyping-by-Sequencing Facilitates a High-Density Consensus Linkage Map for Aegilops umbellulata, a Wild Relative of Cultivated Wheat
Source: G3 (Bethesda). 2017 Mar 29;7(5):1551–61. doi: 10.1534/g3.117.039966 (PMC5427507; doi:10.1534/g3.117.039966)
Supplement: Supplementary file 15 [file 1551TableS2.xlsx]

## Sheet: High_density
Table S2. High density map constructed for Ae. umbelluata using two bi-parental populations.
SNPs	Alleles	Chromosomes	Consensus(cM)	query sequences (SNP tags)
TP11940	A/G	1U	0	TGCAGCAGCTCGCGTAAAATAATGTTAAACCTCTTCTCGGTGTAACACTAGTGCAGAACCGAAA
TP9663	C/G	1U	0	TGCAGCACACACTGCTGAGCTTCCCGCCGAGCCATGACGACGGGAGCAGCCTCCCTCTGCCCCA
TP28990	C/T	1U	0.1	TGCAGGACTATGAAAACATCAAAGGAATGATTCCACCAACCCTCAAAAACCTCTGCAATTTGGA
TP10973	A/C	1U	0.74	TGCAGCAGAGCCATGTATGGCCCCCTGCTGAGTTGCCTCCCGAAAAAAAAAAAAAAAAAAAAAA
TP13286	C/T	1U	0.74	TGCAGCATGATTAGGCTGCAACGAAGGGGCATACGCAACATCCACAAATTGATCAGGCGTAGGT
TP18365	G/T	1U	0.74	TGCAGCCTTCTCTGGCAACTGCCTGCCGCTCGCAGAGGAGCCGCTCCGCCTCCTTCTACACGGT
TP25182	A/G	1U	0.74	TGCAGCTGAAAGGCACAAACCAACTGCGCAACTACATATACATAATGATCGACGATGATCCGAA
TP2652	A/T	1U	0.74	TGCAGACAGCAACCGTCTAAACTGATGCACTTGCCCTAGTGCCACCAAACGCTAGTCCCATCCT
TP36958	A/G	1U	0.74	TGCAGGTGAAACATATGCATCATCAGAATGAGTGTCAAAATAAATTTGTGTATAGGCCGACGAG
TP1716	C/T	1U	1.41	TGCAGAAGCTTCAAAACAAGGCAAGAGGTTCAGAAAGTCGTTCACTAGAAGGATCCTTCCAATT
TP25833	G/T	1U	1.84	TGCAGCTGCTCGTGGCAGCTCCGATGGCCATGGCCCGCTCGCCGCGGGCTCTGGAGGAGATGAC
TP10417	C/T	1U	2.75	TGCAGCACGCGGCCAAGCACGCGGACCCCGAGGAGGAGCTGGGCGTCGTCCTGCGCCAGTTCTC
TP3277	C/G	1U	2.75	TGCAGACGCCGTACACCCAGAGCCACCAATCGGGGCAGCCCCCGAAAAAAAAAAAAAAAAAAAA
TP39362	A/G	1U	2.75	TGCAGTAGCACCGCGCTCCAGGCCCACTCACCACGTCCCGCGCCATAGCCACTAGGGAGGAGGG
TP27181	A/G	1U	2.95	TGCAGCTTGATGGCGAAGCCCTTGGGCAGGAAGGCATTGAAGCCGAGGATGAGCTCCGAAAAAA
TP31757	C/T	1U	2.95	TGCAGGCCGTGCTCGCCCACCTGTGGCGTGCCGTGTGTCGTGCCCGAAAAAAAAAAAAAAAAAA
TP40728	A/G	1U	2.95	TGCAGTCCATGGGCCGAACTTACAGCCCACCGATTTCTATAAGGAAGGACTCCAGAGGCTACGA
TP18785	T/C	1U	3.09	TGCAGCGACGACCCCACCGCGAACCGTAGAACTAATCTGTTGCCAACAAAGGTGTGCGCCAGGT
TP24840	A/G	1U	3.09	TGCAGCTCGTCCAATCCCACCGTCGAGCACGCATGAACGGCGCGGTGCAGTGACTCGGCGTGAA
TP16801	C/T	1U	3.67	TGCAGCCGCCGCAGAATACTTCCTCACGCTGATGGTGGCTCAGTAATACTGTGATCGGCCGCAC
TP37062	A/G	1U	3.67	TGCAGGTGAGGAGGAACCAATGGGGGCTCTCGAGCTTCGTCTTCGTTTCCGAAAAAAAAAAAAA
TP25789	C/T	1U	4.75	TGCAGCTGCTCCACCTTGTTTGTGATGAGCCACCGCGACATCGGCGTGGCAAGCCCACATTCCT
TP12036	A/G	1U	5.83	TGCAGCAGCTTGACAAGCTCGATGGAGACGTAGAGGGAGATTGGGATGAAGTAGCCGTAAAGGA
TP6797	C/T	1U	5.83	TGCAGATGAGCTCTTGGCAGGAAAACACCAGCCCCTGCAACTGGACGGGCATCGTGTGCACGGT
TP22136	C/T	1U	6.24	TGCAGCGTCGACCATCTCGGGCGTCCAGTACGTGCCCAGATCCGAAAAAAAAAAAAAAAAAAAA
TP19692	A/C	1U	6.58	TGCAGCGCCACCACCAAAATGCAGCCGTGGTCGCCCCTGCCACCGAAAAAAAAAAAAAAAAAAA
TP3493	C/T	1U	6.91	TGCAGACGTGGACGATGCACCTTGCGGATGTCAGAGGATGCTGTCGACAATGAGTCCACCGAAA
TP3802	A/C	1U	6.91	TGCAGAGAAAATCATACTTACAGAATTTATCCAACAATGAATAATTTCAAATATACGTACACTA
TP31067	G/T	1U	7.32	TGCAGGCATCTAGGGAGCTTCTTTATAGCAGGGCAGCCTCTAATTACAAGATACCCGAGAGACC
TP44856	C/T	1U	7.32	TGCAGTTCTTGATGCATCTGTCAGTCTCGAATCTCCTGACGCATATTGAGGAAGGCAGTCCAGG
TP11364	C/T	1U	8.32	TGCAGCAGCAGCTGGTCGAGGCGAAGAAGGAACGCAGCAGCATCGCCAAGGCGCTCCTCACGAT
TP29609	C/T	1U	8.32	TGCAGGAGCTGGCTTATGATATCGACGACTTCGTGCAAGGTCTCTGGGTTCCCGAAAAAAAAAA
TP42419	G/C	1U	9.5	TGCAGTGCACCTGTGTTGGAGGAGTTTCTTCCGAGAGTTCCAATGGCGGAGCTGGTGGCCGCCA
TP36611	C/T	1U	9.86	TGCAGGTCGACAGCAAGACCTGGACGCTCCTACGCAACCTGATGGCGCTGGAGGAGCATGCGGA
TP8670	C/T	1U	10.22	TGCAGCAACGCCCATCGGGTCGGCGCCTCCCTCGCCATCTGCGCCCTCCGCCGAAAAAAAAAAA
TP18749	C/T	1U	10.3	TGCAGCGACCGCCTCGGGTCCAAACCTGGCACACCCGAGTGCAAAGCCTAGGACAAAGCCACTG
TP1133	C/T	1U	11.01	TGCAGAACGACCCCAAGAGCCGCCCCTCCATGGCCCACCACGTCCTGGGCTCCCTCCAGCTGCT
TP36346	A/G	1U	11.37	TGCAGGTCACGATGCAGTTCATCTCCACCGTCATGGTGGGGCACCTCGGCGACGTCACGCTCGC
TP20527	C/G	1U	11.73	TGCAGCGCTCCTCACGCGTCCAGGCGGTCTCCGCGTACCTGTGGAAGGTCCTCGCCGAAAAAAA
TP34677	C/T	1U	11.73	TGCAGGGGAGATCGGGAGGAGGTTGGGGATCGGCGGAGATGACGAACGAGTGGGCGTGCAGTGG
TP43475	G/T	1U	11.73	TGCAGTGGTGGGTTGACATTGCTAACAGTTGGACCAGACGCTGGCCAAATGAGCCGCAAGCTAC
TP29165	A/G	1U	13.16	TGCAGGAGAGAATGGGTGGAAGACCGAAGAGGAGAGGAGTAGTAAGCAAATCGAATCTGCCGCG
TP32293	C/G	1U	13.96	TGCAGGCGCTGCTGCTCGCCTTCCTCTCCCTCTGCCTGCTGCTCCTCTCCGCGCTCCTCTCGCT
TP33107	A/G	1U	13.96	TGCAGGCTGGTCACCACGCAACGCGACTACGCAGACGGTGGCCATGATCGCGAGCAAGACGGAG
TP26942	C/T	1U	14.68	TGCAGCTTCGACGTGTCAAGGTGTGTCGCTAGGGAGGCTACACGGTGATCTCATGGATCGAGAT
TP29741	C/T	1U	14.97	TGCAGGAGGCAGAGCGGTTCAAGGACACCGACAAGACCACCGCCATCTTTGTCGGTGAGATCAG
TP36335	G/T	1U	14.97	TGCAGGTCACCCGCGCAGCCGTACGATCAACAGGATCTAGACCATCCGAACCTTATCCACCGAG
TP19452	A/C	1U	15.4	TGCAGCGCACCCAAGTGCCAGCGCCATGGCTACCTCACACAAGACGTGCATCCGAAAAAAAAAA
TP2054	A/G	1U	15.64	TGCAGAATATTTAATCCTCTAGTGAATTTAATCCTCTAAGGGATTGGCTGATCCCCCACCCTAC
TP5375	A/G	1U	17.78	TGCAGAGTGGGAGAGATAGATAATGAGGAGAGATCGATGCTGCACTACTGCTCTACTTGTTTCG
TP14616	C/G	1U	18.93	TGCAGCCAGCTTGTACGCGCTTCTCTCCCAGAAGTTGTCATTTCTTTCATAGTGCCACACAATA
TP28577	C/G	1U	18.93	TGCAGGACACTCGCATCCGTACCATCCTTGGCTGTCCTTGCACACACCGTAGCAAGGATACTTG
TP39908	A/C	1U	18.93	TGCAGTATGGGGGTCCTAACCAACATAAATCAAAAGAGATGGGTCATTACTGGAGGAAGAAGGA
TP43513	A/T	1U	18.93	TGCAGTGTAACCTCTTACTCGCATCGACCTAACCAAGACCATACCTAAGGCACAAATGCTGAAA
TP45301	A/G	1U	18.93	TGCAGTTGGGCAACGCCAACCAACGGTTGAAGAGCGTCACTCGAGCTACTGCGTGTACTCGTCG
TP8328	C/T	1U	18.93	TGCAGCAAATGCAAATGACGAGTTCAGTGACTAGGACAGGCAGTAGAGAATCAGCTTCAGTGAC
TP31732	A/C	1U	19.29	TGCAGGCCGTCAGCCCCAGCCTCCAGAATCTCAATCAACTCGCCCATCGTTGGCCGATCGGAAG
TP5737	C/G	1U	20.35	TGCAGATACTCGGTAAGAGTGTTGCATTCGGCAAAATGCACTTGGCTTACCCCCTTTGGCAAAG
TP40372	A/G	1U	20.97	TGCAGTCATGCCGTATGTATACATACATCAATTTTGCATCCATGGTCATAATTTAATCATGATA
TP14622	G/T	1U	22.5	TGCAGCCAGGACTCCTGTGGCAGCGACCAGAGGAACGGCGCGCCGAAAAAAAAAAAAAAAAAAA
TP14812	C/T	1U	22.64	TGCAGCCATCCAGGAAGCCATGGACGCCGCTACGGTGATCGGGTGTTTCCGAAAAAAAAAAAAA
TP15762	C/T	1U	22.64	TGCAGCCCCGTGCACATCAGCTGCTCCGTGCACAGTAGCTGGGCATGCACCTGAGCCGATGGCT
TP16387	C/T	1U	22.64	TGCAGCCGAACAAGGCCTAAATGGTACCAACGACTAAACTCATCCGAAAAAAAAAAAAAAAAAA
TP30453	A/G	1U	22.64	TGCAGGATGGTGAGAACGCCCAGCTTGCCACTCTTCAGGTTGAAGTCGTCGGGGATGTCCTCGT
TP1875	C/G	1U	24.66	TGCAGAAGTAATGCTAGACTGCTCGCCAGCTGTGGCGACCTTGGAGCTAGAGCCCATGATGAGG
TP40295	A/G	1U	24.66	TGCAGTCAGTAAAGAAAGTGCAAAGCAAAAATGGTGCTACATTTCAAAAAATGCAAATAAACAA
TP1876	C/T	1U	25.38	TGCAGAAGTAATGCTAGACTGCTCGGCAGGTGTGGCGACCTTGGAGCTAGAGCCCTTGATGAGG
TP3752	C/T	1U	25.74	TGCAGACTTGCCGCGCACCTCCCTTGAGTAACCCTCTGCACTCCACCTACGTGCCAAACGTCCC
TP3778	C/T	1U	25.74	TGCAGACTTTGCAGTGCACCGCGTCGAGTCCACACATGGGTAGCTGACTGACTACAGTAAACGC
TP44152	G/T	1U	25.74	TGCAGTTATGGCCGATACATCCTCGCCTGATGGTCAGCTACAGCGTCGGGGTGGCCGTTCCGCG
TP43284	C/T	1U	26.07	TGCAGTGGCGTGCCGATGATGATGTCGCTTGAAGGCGTCCTTCGCGGCGATGAAGTGTCGATGT
TP28376	G/T	1U	26.74	TGCAGGAATACATGGAGGCGCAGGACCTTGGTGCATCGAGTACACGGCCGAAAAAAAAAAAAAA
TP3260	A/T	1U	26.74	TGCAGACGCCATCGTGTACCATGTCGGTCGGGTAAAGTTATCTCTCGAGCCCCCTTCCCCGAAA
TP38789	C/G	1U	26.74	TGCAGTAATTGCATGTTTCCATATGGCCATGATTTATAAAGCATTGTGAACACACAAGCATTTA
TP39929	A/T	1U	26.74	TGCAGTATGTTGTTAAATATTCATGTTAGCCATTGGTTAGTAGGACACGTTTGTTCGAGTGGCT
TP41988	C/T	1U	26.74	TGCAGTGAACTGCTTAGTGTCGAGAGCAGAGGCCTGGTCAAAGCCAAAAGCATCTATCCACTCA
TP35525	C/T	1U	28.55	TGCAGGGTGAGTGGCTTGGCGATAATCCCGTAGTGGGGCACAAACTTGCGGTAGTAGCCGAAAA
TP12804	A/T	1U	28.91	TGCAGCATACACAAGACCAAGCAAGAAATATAGCTGTATACGAGGCTCAGACCAGTAGAAACAG
TP32604	A/G	1U	28.91	TGCAGGCGTCCCATTTGAATTAAGAAAACAAACAAGCTCAGTCGTCGGTGTATTCAACTCCGAA
TP4182	G/T	1U	28.91	TGCAGAGATCTCTGTCTGGACCTAGACGAAGCTGGGTGTACGGCCGAAAAAAAAAAAAAAAAAA
TP5545	G/A	1U	28.91	TGCAGATAAAACTGAGCAGTGGTATTAAGCGCGTCATAGATTCTACATTTAACCGAAAAAAAAA
TP5703	A/C	1U	28.91	TGCAGATACCGCAGCAGACACTGTAGGAAGGAGTAGGCGAACAGACCGAAAAAAAAAAAAAAAA
TP17007	A/T	1U	29.99	TGCAGCCGCGGCCAAACACATGCCACACGGAGCTCCATCTGGCTTTCGATCCAGCAGTCCCGTC
TP23243	A/G	1U	31.53	TGCAGCTAGCAGCGCTGGAAAGAACCTCTGGATTTTACAGATGCAACGCCAAGGCGTCGGATAT
TP26323	G/T	1U	31.53	TGCAGCTGGGTGCGAGTTCCATCATATTCAACTTGCATGATATATGATATTTTTGTTGGTTACT
TP3748	C/T	1U	31.53	TGCAGACTTCATGGCTGGCCTGCTTGTCTTTGCTATGTTCTAAATCAAAGGCAGTGCGCAGCCC
TP38245	C/T	1U	31.53	TGCAGGTTGGGTGGCACGGGCTCCCTCTCACGCTGAGATGCGGCGGTTGTCGCCGAAAAAAAAA
TP43710	A/C	1U	31.53	TGCAGTGTGATGCGCAGGGCCAGTTCCTCCTGTGTCGATCTGCCTCACGAACGAAGGTGTCCCA
TP6532	C/G	1U	31.53	TGCAGATCTAATTTGGGCATGAATGCATGATTACCGTAGTGCGCATGCCGTGATGCGTTGCCGA
TP13521	C/T	1U	32.94	TGCAGCATGTTGAGTTCCTTGATGCCCAGCCCAATAGCTATATCTTCATGAAACGCTGGAGCCA
TP18579	C/T	1U	32.94	TGCAGCGAAGAGCTGGTCATCTCCAACTACAGTAGTACACTTGCATGAATGGGCTGGGTACCCA
TP25558	C/T	1U	32.94	TGCAGCTGCCGCAATACCCCAGTACCCCTGTCCCCGTCCGTGCCTAGAACAGGGGTGAACAGAG
TP25708	C/T	1U	32.94	TGCAGCTGCGGCGGGGTGTTAGCTAGCTGATGTAGTCTCATACTCACACGATCGTGGCTAGCGC
TP41179	G/A	1U	32.94	TGCAGTCGATGAGCTCCTGCTCGGACAGCGCCGTCAGGTTGCCCGTCACGATGGCGTTGATCCC
TP20140	C/T	1U	35.64	TGCAGCGCGAGGACGCGGACGGGCGCGTGGGGATCAGCCTGAGCAAGGCGCTCCCAAAGGCCGC
TP12042	A/G	1U	36.98	TGCAGCAGCTTTCCATGGCGACAGCGGCAGACTTTTTGGTTTGATTTAGTTGCAGTACATTAGG
TP15585	C/G	1U	36.98	TGCAGCCCCCCACTTGGGTCTCTGCACTGCATCGCTGCGCTCACGCGGTATGCGTTCGACCCGA
TP18316	A/G	1U	36.98	TGCAGCCTTCAAAATATTATGAAGCGCCCTTCATATGCATTTTGAAGGCCGCAGATATCACTAG
TP21636	A/G	1U	36.98	TGCAGCGGGGGTGCCCGACAGCTTCGCCGCCCCGCCCCGCACCGCATCCATCCACCCCACGGCC
TP36979	A/T	1U	36.98	TGCAGGTGAAGCAACATGATGGTCAGGGATGCTTGGATCACTTGACCAAATGCACCGAAAAAAA
TP39257	A/G	1U	36.98	TGCAGTAGAATCAAAATCAAAAGTGGAAACTGTAAAAACTGATGTACGATAGAAAAGAAGCCAG
TP43382	C/T	1U	36.98	TGCAGTGGGGGTTGAGTGGTGTGGGTTCGCGTTCCTTGAGACTCCACCGAAAAAAAAAAAAAAA
TP44998	A/G	1U	36.98	TGCAGTTGAGTTGCTGACAAAGGAAGTGACTGACATACCTGTTGATCAGACTTGACATGGCGCT
TP12859	C/G	1U	40.07	TGCAGCATAGGGCGGATGAGTGAGAGGCCTTCCGCCGCCGTGTCGATGGTCTTGGGATTGCCGC
TP11252	A/T	1U	41.07	TGCAGCAGCAGACCCATCCTCGACGGTTTCCTTCTTCGAAGCTGTCTCACCATCCAAGCCTTGA
TP459	A/G	1U	41.07	TGCAGAAACTATGGAGATGGTCGGACTCCCAAAGTCTCCTATTGCAAACGGACTTTTCCGTAAA
TP8972	C/T	1U	41.07	TGCAGCAAGCCGCACTTCCTACTAACTTAAACCATGCTTTCTACTAACCGATCATTACCTTCTT
TP2766	C/T	1U	44.65	TGCAGACATTTGAAAGTACTTGTTACACTGCCTAATCCATCCTACTGGATCCTCTCCTTGAAGG
TP40441	C/T	1U	44.65	TGCAGTCCAACAGCAGAGCAAAGTGGTGTGGCTGCACTGCTATGATGTGGCTACTGAGATCGGA
TP45769	C/T	1U	44.65	TGCAGTTTCTAGCAGCTCTGCGCGTTTAAAAAGAATGATGTTCTCTTGTTGCTGTCTAGGCTGG
TP492	A/G	1U	44.65	TGCAGAAACTGCTCCAGCGGTGACTACAACCAGCTTCTGAGCGGCCTCGGCAACCTCGGCCACA
TP4796	C/G	1U	45.72	TGCAGAGGAGTGACATTACATACTCTGGTGTCAGGCAGCTGAAGCTGAAGCTGCACTCTGACAG
TP5040	A/G	1U	45.72	TGCAGAGGGTACCAGCTGTGGCTTCACTTTAGACTGTGTAGCACGGGTGTCAGAGATATGTGGA
TP5596	C/G	1U	47.47	TGCAGATAAGAGATGCCTGCGTGTTTGTGCTGGTGTCCTGGGATGCCGAAGATGGTGGTGCTCG
TP16056	G/T	1U	48.14	TGCAGCCCGCGTCGAGGTTCTTCAGCTTGGTGTGGCCACAGTAGCTCATGATCCACGAGCGGCA
TP36482	C/G	1U	48.81	TGCAGGTCCATCATGGACGCGAACGCCGCGTGGCCGACCTCCACGGGCGCGCCGAAAAAAAAAA
TP8433	C/G	1U	49.81	TGCAGCAACACCTTCAATAAGGGATAACACACTCGTGTTGTAGTCACCACATCCGACCGAACAC
TP16235	C/G	1U	50.81	TGCAGCCCTCTACAGTCTTCTTCGAAGACTTGTGCACGAGAAAGAAAGAGAGAGACTAGTCGGT
TP10548	C/G	1U	50.89	TGCAGCACGTCGCCGTGGACGAGCGCGAGCTTCCCCGCGCAGTGATCCACCGAGGCGAGGGCGC
TP1128	A/C	1U	50.89	TGCAGAACGAATAGATATACCCCCACAAACAACCCCAAGCCCACCGTACCCCATCTTCTTCCAT
TP11810	A/G	1U	50.89	TGCAGCAGCGGCGGAATAGCGAGAGCAGCAGCTCAGGCCACACGCAGCAGCCGAAAAAAAAAAA
TP12209	A/G	1U	50.89	TGCAGCAGGCCACTGACTCACTGAGCCATGGTCGCGCGCAGAAGGGCGGTCTTGGCTGCGTGCA
TP12307	A/G	1U	50.89	TGCAGCAGGGATGTTATTGCCGAATAAGCTTTTGTAACAGAGAAGATGTTGCAGAAAAAAAATT
TP13055	C/T	1U	50.89	TGCAGCATCCTGCCTCTCCTCCGCCGCGCTTCTCCAGCCGCCGAAAAAAAAAAAAAAAAAAAAA
TP13388	G/T	1U	50.89	TGCAGCATGGAGACGGACGACACTAGGGCCGCGGAGATGTTGCTCGCGTTGGCCAGCGCGGCGT
TP14570	C/G	1U	50.89	TGCAGCCAGCCTATGATGTATTGCCGCCACTGAAGTGCAGCACCAAGTCTTTTACCGAAAAAAA
TP14623	C/G	1U	50.89	TGCAGCCAGGAGATCGAGATCTTGGAGCGCGAGATCGGCGAGCGACTGGCGGAGCGCTGGACTT
TP15053	C/G	1U	50.89	TGCAGCCATTTCGGGCCTCCTCGAACCGCACCTTTTCAGGCCCGAAAAAAAAAAAAAAAAAAAA
TP15315	A/G	1U	50.89	TGCAGCCCAGGTCCTTGTCTGAGGACGCTGCATCGTCAACCGAAAAAAAAAAAAAAAAAAAAAA
TP15485	C/G	1U	50.89	TGCAGCCCCACCATGGTGAACACGTCCGCCGCGCCGAACAGCACGTACTGCGGCACCATCCACC
TP17131	C/T	1U	50.89	TGCAGCCGCTGCCGAGCGCCTGCTTGACGGCCAGCAGCGAGGCGCCGTTGGAGAACCTGAAGCC
TP1766	A/G	1U	50.89	TGCAGAAGGCAAGGCGCCACCGAGATTGTCGGAATCGGTTTGCAGTAGCTTCCTCCTTGATCCC
TP18935	C/G	1U	50.89	TGCAGCGACTCATCACGATCCATACGACCCATCACGTCGGTCAGACCACGACGGGCGAACCGAC
TP1913	A/G	1U	50.89	TGCAGAAGTCGCCGCAAGTCGAGTCGCCTCAGCCATCGTTTGACCCTTGCCTTGCGCTACAGCG
TP19674	C/T	1U	50.89	TGCAGCGCCAAATAGGGTTTGCCCTACGGCGCCTTATCCGCCCGTTCGCTCGCGCAGCAGCCTC
TP19734	C/G	1U	50.89	TGCAGCGCCAGATCAATGGCCTTGCCCACACCGACCGAAAAAAAAAAAAAAAAAAAAAAAAAAA
TP19924	A/G	1U	50.89	TGCAGCGCCGCCTCCACGTCGTGGAGGAGCCCCGCGTCTCCTGGCGCATCGGCCGCCGCGGCGG
TP20574	C/T	1U	50.89	TGCAGCGCTGCAAAGGCATCGCATCGTGAGGAGCGGTCAAGGAAAGGAAAAACTAAAACATGAT
TP20885	G/T	1U	50.89	TGCAGCGGCAACGGGAGATGTCCGAGGAGGAAAAACCAAGTCGCACGCAATCGAGCTAGGGTTG
TP21036	G/T	1U	50.89	TGCAGCGGCATGTGGCGGTCGCTTCGAGTGGCCCTATGCATGGAGCAGACGATGCTGGACGCGG
TP21489	C/G	1U	50.89	TGCAGCGGGAGCTGCTGGGCCGCCTGAGATGCAGATGGAGCCGTAGCTCATCCGAGCTGCCGAA
TP21746	A/G	1U	50.89	TGCAGCGGTAGCCGCTTGGCGAGTTGCCCGCTGCGGAACACAACACGCGGACGCAGAGCCCGAA
TP22249	A/T	1U	50.89	TGCAGCGTCTCGGCGCTGTACATTCCCTCCCTTATGAATCACCATGGTCGATTTGGTTCATAAC
TP22463	G/T	1U	50.89	TGCAGCGTGGCGCGGGAGCTCGCGACTGCGGGACAAGCTGCGGCGGGGCGTCGAGCGGGCGCGG
TP22608	C/G	1U	50.89	TGCAGCGTTCGCGTGGCTGCGGTGCGACAGGGAGGACGTGGAGGACTGCGCGGGGTTCCTCCGC
TP22747	C/T	1U	50.89	TGCAGCTAAATTCAGATGACACAGAAAATTGCAGCGATACATTGATGCTAAGATTTTGGTATCA
TP23040	C/T	1U	50.89	TGCAGCTACATTAGAGTCCCAAAAAACAATAAAGAAAAACCCTAAACTAGTCATACGCTCCAAC
TP23371	C/T	1U	50.89	TGCAGCTAGTAGTGGCCGAAGTTCAGCACCGTCATCAGCTCCATCATCCCGTCCAAGTTCCCCA
TP24007	A/C	1U	50.89	TGCAGCTCCACGCCGTTGTCGACGTCGACGGCGAGCCGCTCATACTCTTCGATGTAGTCGAGGT
TP2413	C/G	1U	50.89	TGCAGAATTTCACGATCGAGGTCGCGGCGACCGCGCGCGTGCGTGCGGGTGCCACCGCACCGCT
TP24238	C/T	1U	50.89	TGCAGCTCCGCACCATTTGGGTGGCAGTGACGCTTCGCTGGTGCTAGCCGACATTGCCACCGAA
TP2456	G/T	1U	50.89	TGCAGACAAAATCGATTACCCTTAAGATTCAGCAAAATGTTCTTCCGCTCCCTACCGAAAAAAA
TP24736	C/G	1U	50.89	TGCAGCTCGGCGACGGCGAACCTGTCGGGCGGCCCGTGCCCGTCGTGGCCGCGACCGAAAAAAA
TP25000	C/T	1U	50.89	TGCAGCTCTCAGCTCCCAGGCTTCGTTAGATGGGTGCAAACCGAAAAAAAAAAAAAAAAAAAAA
TP25079	C/T	1U	50.89	TGCAGCTCTGCTGGAACAGATACGGGCCAACGGCACTGTTCGGGCAAATCGCCTTTCAGCCGTA
TP25455	A/T	1U	50.89	TGCAGCTGCATGCAGAGCTGGATCCTCTCCATCGCCGACGCGCTCAGTGGCAGCTGCTCGCCGC
TP257	A/G	1U	50.89	TGCAGAAAATAACTATCATAACAAAACAAATCCTCAAAAAAGCAAACAGTAAAGAAGAAGTTAA
TP26476	C/T	1U	50.89	TGCAGCTGTCGCCGCCGCTCCACGGTTCCACCAGCCGTCGTTTGCCTCTTCTGGACACCTCCCA
TP26763	A/G	1U	50.89	TGCAGCTTCAAGTATGGCTCCTTCGCCTACAACGCCGCCTGGGTCGTCGTCATGACGGCATTCA
TP27029	C/G	1U	50.89	TGCAGCTTCTCCAGCATCACCTTCATGAACTTCTTGATCTTGGGGCTCGCGTCCTCGCCGAACA
TP27120	G/T	1U	50.89	TGCAGCTTCTTTGCTTCTTCCATGCTTGCAAAGGGAGCCCATGAACCAGTTCCAAGTGAAAATA
TP27154	A/C	1U	50.89	TGCAGCTTGAGACCGCAAAGGCCACCATTGATTCACTCATAGCTGAGGGTGCCCGAAAAAAAAA
TP27366	A/G	1U	50.89	TGCAGCTTGGCCGTCGTGCTCACCCATTAGTTATCCGCAAACATCGGAGGGCGGAGGCATCGCC
TP27664	A/T	1U	50.89	TGCAGCTTTTTGGCGTCCGCAGCTCGTGAGGCGGAATGATACCGCCACCACTGCTGCTAATGAA
TP28274	C/T	1U	50.89	TGCAGGAAGGACCCATTCGATGCTCTGATCCTCATTCTATTCTTGTCGGCGTAGCTGCGCACTA
TP28282	A/C	1U	50.89	TGCAGGAAGGAGCGCGCGATGGAGTAGAGCATCTCCGCCTCCACGCCCAGCCGCTGCGTGAAGC
TP28558	C/T	1U	50.89	TGCAGGACACCCCGCTCAAACTTGGGCTCAGCCTATTTATATCTCTCTTTTGCGTATATCTATT
TP28685	A/G	1U	50.89	TGCAGGACCCCACGGGAGCCCTCGCCGACTGGAACGCCTCCGATGCCGACCCCTGCTCCTGGAA
TP28764	A/C	1U	50.89	TGCAGGACCTGCCAGAGGAGCAGCGCGCGGACGCGGTGAGCAGCATGGTGTACGAGGCGGCGGC
TP29081	A/G	1U	50.89	TGCAGGAGAACGGGGGCTGTTCACTTGGCGTCGGCGTCACCGAAAAAAAAAAAAAAAAAAAAAA
TP30305	G/T	1U	50.89	TGCAGGATCTGAGGAAGATGCTGGACGAAGGGAAGGAGCTCGGGATGCCGAAAAAAAAAAAAAA
TP30893	G/T	1U	50.89	TGCAGGCAGATGATGTCCCAACAAAGCACGAAGACGGCGTGAGTCCAATGTCAGGCCATGGTGA
TP31066	C/T	1U	50.89	TGCAGGCATCGGTGTCTCGCACACGGGCAAGGCCAGTGAGGAAGCCGCTCAGGGCTTGCTCGGG
TP31645	C/T	1U	50.89	TGCAGGCCGCGACGTTGATCTAGTGTTGTATGACAAACCACTGTTAGCCTGACTCAACTACTAT
TP31655	C/G	1U	50.89	TGCAGGCCGCGGAGGACGTAGCACGCGCGAGGGCGGCAAGGAAGCCGTCCAGGGAGCGCTCGGG
TP31841	A/G	1U	50.89	TGCAGGCCTCGGAGGGCGTGGCACGGGTGAGGGCAGCAAGGAATCCGTTGAGGGGGCGCTCGGG
TP31845	G/T	1U	50.89	TGCAGGCCTCGTCGTTCGTGAGGCGACCAGAAGCCAGAGGTACTATATATGTGCCCATGCTCAT
TP31899	A/C	1U	50.89	TGCAGGCCTGTTAAGCCCACATCACTGGTCTGACCAGCCAGGCCCGTCAAGAGCACTCTTAAAC
TP32161	T/C	1U	50.89	TGCAGGCGCCCGTTAACAATCTGGCGCCTGCATGTTGCTAGCATGGTCCGAAAAAAAAAAAAAA
TP32214	A/G	1U	50.89	TGCAGGCGCGAGGTGGCAGCGGCATTTCCAACTGAAACGTAATTAATGACAATTAATGAACCCT
TP32301	A/G	1U	50.89	TGCAGGCGCTGGGCCCACCTCCCTCGCGAGCTCCCCACCCTGGATCTCAAAGGTCAGCGACGCG
TP32473	A/G	1U	50.89	TGCAGGCGGCTCTTGAAACTGGGGTCTGAAATTTGATCCCAGAACTCACGCAGCTCCGCCTTGT
TP32691	C/T	1U	50.89	TGCAGGCTAAATTACTGTAGTTTTTGATACTTAGGTTTTTGGGATACTTTGCAATCAAACACAG
TP33043	C/G	1U	50.89	TGCAGGCTGCGGAGGCAGGCGCACGGGCGAGGGCGGCAAAGAAGCCGTTCAGGGAGCGACTGGG
TP3467	A/G	1U	50.89	TGCAGACGTCCAGAAGCCAAGCCCCGTGGCTTGGCCTTGATGGATCCGTGTGATTTGGGTCGTC
TP34840	G/T	1U	50.89	TGCAGGGGCGGCGTCAGAGAAGAACGCCCCATCGCAGTCTGCCGCTGTGGCAGATTCACAGTCG
TP35365	C/G	1U	50.89	TGCAGGGTATGATTGCGGACTTCGACATCCGCAGCTCACTCACGTTGCCGTTGCAGATCTGCTC
TP35973	C/T	1U	50.89	TGCAGGTACCGTCGCCGTCGAACTACTGCCTGTCAATACATCGTTGCGCGGCCGAAAAAAAAAA
TP36633	C/T	1U	50.89	TGCAGGTCGACGAAGCACATGGTGGCGTGTTCTCCACCGATGGAGATGGCCTTGTGTGTGACAA
TP36766	C/G	1U	50.89	TGCAGGTCGGCGACGGCGAACCTGTCAGGCGGCCCGTGCCCGTGCCCGTGGCCGCGGTCGCCTT
TP37312	G/A	1U	50.89	TGCAGGTGCTCGGAGCTGTTCAGGCGGATGCCGACTTGCCCGAAAAAAAAAAAAAAAAAAAAAA
TP37419	C/T	1U	50.89	TGCAGGTGGAGTACGCGGTGACCGTGCGCGGCCATAGCTTCATCGTCGTCGGCGTGCGCGTCGA
TP37594	A/G	1U	50.89	TGCAGGTGGTCCTTTCTATCAATACAAAAGTGTATGTGGTCCTTTCTCACAAATTTTATGTGGC
TP38569	C/G	1U	50.89	TGCAGTAAATATTGATCTTTCTTCGTTCTGATACGATGCCCGCGTAGATGTAGTAATCCAGCAC
TP38595	A/G	1U	50.89	TGCAGTAACAATCTCTCGGTAAACATCTTGTTCGTCGGCACATGGTGAATGCCGAAAAAAAAAA
TP38620	A/G	1U	50.89	TGCAGTAACCATGCCAGCAACTGCATCCGTCTAACCTCGCATTGTACAGTTTTGGACTTGTAGC
TP38685	A/G	1U	50.89	TGCAGTAAGCCAATATGTCCAAATCCGAGCAACAAAAAAGTCAATTAAGCAGACTGCCTGTTGC
TP38770	C/G	1U	50.89	TGCAGTAATTACTCTGAGTATGTCTCTGTCAAAATTGAACTTTGTGACCGAGTGTCGGGAAAAA
TP39187	A/G	1U	50.89	TGCAGTACTGCTCTGGTCGATCGATCGGCGATCTCACACGTTCAAGTTGCCGAATCGCAGGACC
TP39203	A/C	1U	50.89	TGCAGTACTGTTTCAACGTGAATGACAAACCATATATTTCGATACAAGGTGTATTACAAATTAA
TP39286	A/G	1U	50.89	TGCAGTAGAGACGGAGCTACTCGTGCCTGCCACCGCCCGTCCATCCATCCGAAAAAAAAAAAAA
TP40770	C/T	1U	50.89	TGCAGTCCCAGGCCGCCGAGCAATTCAAGGCGCCTGATCTTAGCAGCGTCATCTCAAACCCTGA
TP40936	G/T	1U	50.89	TGCAGTCCGCGTCCGCCGAGCAGGAGGATGACCTCCTCTGTGACGCCATGCGTTGGTCATTGAC
TP4246	G/T	1U	50.89	TGCAGAGCAAACCAGTATAAGCCCCCAAAAAGTCAATGTTCCGAAAAAAAAAAAAAAAAAAAAA
TP42869	C/T	1U	50.89	TGCAGTGCTAGTTCCATCGCCCTGCACTGATCTGAACCCAGAAGTTGATTTATAGCATAATTGT
TP43757	C/T	1U	50.89	TGCAGTGTGGCCGCAGAAAAACCCCGCCTTGGAGTTGGGGTTGGGACTGGGGGCGGGGCCGAAA
TP44033	C/T	1U	50.89	TGCAGTTACCTGCCCATGCATTGGTATGTAACTGAAGCTGCACACCGACTATGCATGTGCAACC
TP44058	A/T	1U	50.89	TGCAGTTACTGCTGCTGTAGCTTTGTACTACTTCTCTCCATAATAACCCATCAGTTGCATGCAG
TP448	C/T	1U	50.89	TGCAGAAACGTAGCATACGATCAGATCACAGTGCATGTGCCAGATTCTGGAGACCTGTGTTGTA
TP4482	C/T	1U	50.89	TGCAGAGCCTGGCGGAGGAGAACGAGACCCTCAAGTCTGAGGCGGGCAGGAAGGAGGCGGATGT
TP45286	A/G	1U	50.89	TGCAGTTGGCTGAAGGGGTGGGGGCTGTCGTTGGATACGGAAGCATCCGAAAAAAAAAAAAAAA
TP45433	C/T	1U	50.89	TGCAGTTGTCTTTCCGTAGCACCCATAGGAACGGCCTGTTGGACTGGCTCATGGCGTCCGCTAT
TP45446	A/C	1U	50.89	TGCAGTTGTGCACCACCCAATATTGATGCATGGCAGGTGGAGCCGAAAAAAAAAAAAAAAAAAA
TP45553	A/T	1U	50.89	TGCAGTTTACCTTCCGATTCAGCCACGCCCCAGCGTCCCCACCTACACATCACTACAGGCTGCC
TP45869	C/T	1U	50.89	TGCAGTTTGCAACAGTTTTCCATCATTTATGTAATTGCATACCTCATCAACTAGATTACCTGTG
TP4595	G/T	1U	50.89	TGCAGAGCTAGAAACTTTGGTACTCAACCATCATACTGTTGCCCAAGAAATATCAAGTTATTGC
TP46153	A/G	1U	50.89	TGCAGTTTTGTCAAGATTATTAAATTCAGTTAGCACATTTTTCACATGAGCAACACATCCATAT
TP4838	C/T	1U	50.89	TGCAGAGGCACCCCAACACCGAGGACGAGATGGTGCAGCTGCTCCAAGTCGCCATGGCGTGCGT
TP5130	C/G	1U	50.89	TGCAGAGGTTCTGTTGCCATGAGGAGGAACGAAGGAAGGTGGAGGGCAAGAGGGAGAAAGGGGA
TP5321	C/T	1U	50.89	TGCAGAGTGAATCATTTTCTGTTATCTCGGTCCCTCCTCTTTAAGCAATCCGAAAAAAAAAAAA
TP5450	C/T	1U	50.89	TGCAGAGTTCTCGATTTCTTTGGGGTGGTAATTCTGCTTACAACATTTTTTTGAGAATGACTAA
TP623	A/G	1U	50.89	TGCAGAAAGTGGCGCTCAAGATCGTCGCCGAGCTCGTCCAAGAATGCGACGACGCGGACGTGCC
TP6793	A/T	1U	50.89	TGCAGATGAGCGCCAAATGAAATATACATCGACATTTTCAGGTAAAGCAACGGAGCAAACCAAG
TP7675	A/T	1U	50.89	TGCAGATTGATGTCGACTGCCTTCCTCCCTTGGAGTTGCACAGAGAGCTGTGAGAGCCGAAAAA
TP7728	A/G	1U	50.89	TGCAGATTGGTAACACCTGCGTGAACGGGACGAGCTTCTGGTGCTCCTGCAACAGCTCCGTCAA
TP38582	A/G	1U	51.81	TGCAGTAAATTGTGAGGAAGGATCTCACATGGTGTAGAAATAACAAAGGAGATCGTCTAGGCAT
TP32136	C/T	1U	52.81	TGCAGGCGCCAACTCGTTAATGGCGCTCGCATGGGCCGAAAAAAAAAAAAAAAAAAAAAAAAAA
TP27231	A/G	1U	53.71	TGCAGCTTGCCGTGAGCGACCTATAGACATGCCTGCTATACCTCGTTTAGCAATGTCCACACTT
TP5067	C/G	1U	53.71	TGCAGAGGTACCACAATTCGATGGTGCTGGGCCTGTGGGACACCAAGGACTGCTGGAAGAGCTG
TP25070	C/T	1U	53.81	TGCAGCTCTGCTCCCCAAAAGGATTCATGTCATCTATACTTATACCAAACCATAAGTTTCTTGC
TP8365	A/G	1U	54.81	TGCAGCAACAAAGAAAAATCCCAATCCATCATCACATGATCCTGTATATAAACTGAGTGGAATT
TP17435	C/T	1U	55.81	TGCAGCCTACACCTAGCACCTGCTGCACGCCTCGGTCGCCGTTAAATGCACTGGATAAGAACGC
TP30664	C/T	1U	56.81	TGCAGGCAACGTCATCTCCTTCATGACCTACCTGGCCCCACTGTAAGCCTCCTACGTGTTTCTC
TP31716	A/G	1U	57.81	TGCAGGCCGCTTGTTCTCCAGGAGCTAGATTCTAGGAGCTGCACCGTTCGGCTAGCTTCTCGCT
TP26430	C/T	1U	58.81	TGCAGCTGTAGCGGGTTGGGGTAGATGCGGTCCTCCCACCCCTCCACACCGCTGCTCCTTCTAT
TP3398	C/T	1U	59.34	TGCAGACGGCGGGCGGCGACCTGGCTATGCAGGGGGAGCGCGCGCAGTCGCTGCTTAGCTGGAC
TP42411	C/G	1U	59.34	TGCAGTGCACCAGCAAGCGGACAAAGCTGTGAGCTCACCCAGGACCCGAAAAAAAAAAAAAAAA
TP7903	A/G	1U	59.34	TGCAGATTTTATATGCCAAGAATTACACACTACGAAGCTTATCCGAAAAAAAAAAAAAAAAAAA
TP40323	A/C	1U	59.81	TGCAGTCATAGCACCTGGACTCTGAGTCTATGTATCTATAACCTTCCTCCTTGCATGTGTATGA
TP25788	C/G	1U	62	TGCAGCTGCTCCACCGCGCGCTGCGCCTCGTCGGCCGCCGCGGGGCCGAAAAAAAAAAAAAAAA
TP2678	A/G	1U	62	TGCAGACAGGCGAAATCAAGCCAAGGGGCCGAGGAAGGGCAAGGCATCGACGGCTCGAGGACGG
TP5235	A/T	1U	62	TGCAGAGTCACGGTGCGCCTGGAGCCATCGTCGCGTCAACCCGAGAGAGACAGAGATGAGGGGC
TP43414	A/G	1U	63.15	TGCAGTGGTAAAGAACTTTGATGGATAGATAGATTAATTAATAGGGACGACAAAGTTCTTGCAG
TP17946	G/T	1U	63.51	TGCAGCCTCTCTGATCTGACGGTCGTGATTTGCTCCCAAGCATGGAGAGCACGGGCGAGAGGGG
TP32272	A/G	1U	63.51	TGCAGGCGCTCTACTCCGTCGGCAACTTCTTCTTACGCCCCAACAACCCCAACAAGTGCTACTG
TP41753	A/C	1U	63.51	TGCAGTCTGGCAGAGCCGTCACTGCATGAATGGACATAGAGAAATTATGATGTAAACACAATGG
TP14185	C/T	1U	66.68	TGCAGCCACCTTCGCCTTGTTGGTGTGCTTCCTGCCGAAAAAAAAAAAAAAAAAAAAAAAAAAA
TP1385	C/T	1U	69.42	TGCAGAAGAAGGAGAAGCCGCGCGGGCACAAGATGAAGCCCTGCAAGAGCTACGCCGCGCTGGG
TP18447	A/T	1U	69.42	TGCAGCCTTGGTAGCCTCTTTAGCACGATCAAGCTGTTCTTGAGTAACTATATGAGGTAAAAGA
TP26697	C/T	1U	69.42	TGCAGCTTAGCCGCCGACGACGGAAGGCCGCCTCTGAACTTGTTGTTCATGATGTAGAGCCTCG
TP29583	G/T	1U	69.42	TGCAGGAGCTGAAGAAGAGGAAGATTGGCTGATGACGTTACTAGCTAATGACTCTTTGAACTTG
TP29965	A/G	1U	69.42	TGCAGGAGTACAGTGAGCGAATTCAATGATGATTAGTGGCAACAACCCGAAAAAAAAAAAAAAA
TP308	A/C	1U	69.42	TGCAGAAAATGTACGTCATTCAAATAAAAGGTTTGGTACAATACCCTTGTCTATCTGAATTTGA
TP36886	A/C	1U	69.42	TGCAGGTCTGATCGTCGAATTCCACGTCAGGTAGGTGGTGGAAGTAGAATGCTGACAGAGTACA
TP38410	C/T	1U	69.42	TGCAGGTTTGGGTTGCTTGTGCCTTGCTGCTCCTCGCCGTGGGGTGCCAGGCCAGCCCTTTCTG
TP38454	G/T	1U	69.42	TGCAGGTTTTGTAGGTTAACACGGGATAAATCTGCTGAAAGATTTATTCAGGGCATTACATAAT
TP41377	C/G	1U	69.42	TGCAGTCGGGGAAGAGCATCGCCGACGCGGCGGACGAGTGCATCGGCGACGCCAGGCAAAGTGA
TP5919	C/T	1U	69.42	TGCAGATATTTGATCTGTTCGATCTGAAGCGAAATGGTGTGATCGAATTTGACGAGTTTGTTCG
TP6033	A/G	1U	69.42	TGCAGATCAGCGGCAGACACTGTATTATATATGGTCAAGCGTAAAGTTCTTCTTGATGCACATC
TP6355	C/T	1U	69.42	TGCAGATCCTTTTAACAGCGAAGATATTTATGGCAGCCTGCTCCATGTAGGTTTTAAAGGAAAA
TP45662	C/T	2U	0	TGCAGTTTCAACAACTGATAAAGTTATTAACCTGATTGACCCTATAACTGGATCCGAAAAAAAA
TP38110	A/T	2U	1.35	TGCAGGTTCTTGATTTGCTGAAGATCGCATTTGGAAGGAAACAGAAACCTGCTGCCGAAAAAAA
TP38421	A/T	2U	1.35	TGCAGGTTTGTGGACGCTGATTTCTTTGATGCCAAGGTATTCGACAAGGACTTCAACGACATGG
TP33896	A/G	2U	2.09	TGCAGGGCAACGGTGGGCGACGGCGAGCGGCTGCTGACGCAGTGCGTCCGAAAAAAAAAAAAAA
TP15120	G/T	2U	2.76	TGCAGCCCAAGGAAGGCCTTGCAATGATGAACAGCACGGCGGTGGGCTCAGGGCTTGCATCCAT
TP2708	C/G	2U	2.76	TGCAGACATATTCTCTGCCTTTGCCAATACGGTCATGGTAGGTTGGGGTTATTTTCTTCTCATT
TP1752	A/G	2U	3.1	TGCAGAAGGAGCTCGTTTTTTTTCCAGTACAGATGCAAGTGTTTATATACACACGCATACACTC
TP19904	A/G	2U	3.1	TGCAGCGCCGCCCTTGAAGCTGCTTTACGGCAAGTACCTTCAACGGCGCCCTGGACAGCTGGGC
TP24398	A/C	2U	3.1	TGCAGCTCCTCGGCTTCTGCGTCGGCCTCCAGATCCCCGACGACGACGCCGACCCCTCCGAGGT
TP2975	C/T	2U	3.1	TGCAGACCCTTCTCCTCTCTGGTACACAGGCATTGACGGGCGTGAGTGTTGGCACCACCTTGCC
TP3062	C/T	2U	3.1	TGCAGACCTCCCATAGGCTTAATCGGCTAGCAAAAGATAGTATGCAGCAGGAGAACCTCAAGAA
TP39315	A/G	2U	3.1	TGCAGTAGAGTAGAGTAGGAAGCAGGGAGGCAGAGTGCTGAGCCTGCGAGGAGGTATGAGGAGG
TP32845	C/T	2U	3.46	TGCAGGCTCCGTTAATTAATTAGTGTGTGTAGGAGCAGGACCTCAATCGATCCCCATGTCTTCT
TP13332	A/C	2U	4.25	TGCAGCATGCCATTGCTCAGGTGGAGAGGGACGAGACGATGGAAGATACTTTCTACTGGACGAG
TP34533	C/T	2U	5.51	TGCAGGGCTGCACAAGCTTACCAGTCTCAACACATTATTGCTCCGCTTTTGCCCAGCTGTCTCG
TP3715	C/T	2U	5.83	TGCAGACTGGTTGCAAGTCAATTCATCACCCTTATTTGCAGCCAATTCTGAAATATTTTCAAGT
TP38843	A/C	2U	5.83	TGCAGTACACAGCCTTTTTACCTCGCATGAATGAACATTTATAGTGTGTTCCTTCCGAAAAAAA
TP11126	A/T	2U	6.98	TGCAGCAGCAAACGCCCATGGTCTTGATGACGTGTTGAGGAGCCATGGTGAGAGCTGGTCGCGA
TP39900	A/G	2U	6.98	TGCAGTATGGATTGAACTGGGAGAAGGAAGCACTTAATAGCCTGAATATAACTGTCATATGTGG
TP45811	A/T	2U	7.58	TGCAGTTTCTGGAGCTTTGGGATGTGAAAGGCCTGAGGACACTGGAGCCCCTCTCAAACCTCTC
TP11650	A/C	2U	7.77	TGCAGCAGCCTGAAGCCGACGTTGGAGGAGGCGAGCCGCGTGTCGACGGAGGCCTGCTCCAGCC
TP44904	C/T	2U	7.77	TGCAGTTGAAGTAGGCTCCCCTTGACTCGGAATTAGAGCTCACGTACGGTGACATGAAGGCGTA
TP18031	A/C	2U	8.57	TGCAGCCTGAGCAGCACGTCAAGGAGATCCTCGTCGTCGGTGCCAGAGCTGCCGAAAAAAAAAA
TP44075	A/G	2U	8.91	TGCAGTTAGCAGTAACTTGCTAAGTAAACTGAATTAACAACGAGAGCAGCAAAGTCAGGCCGAT
TP10955	C/G	2U	9.65	TGCAGCAGAGAGTCGGCAATCGCATCAAACATCTCGAGGCAGCGCTAAGATGCTGGGGCAAGGG
TP11108	A/G	2U	9.65	TGCAGCAGATTCAGGGCACTGAACGCCGCTATCGTCCAGAAGAAGTAGTCCAAGTGTCCGTCGT
TP22151	G/T	2U	9.65	TGCAGCGTCGCCCTCGACCTCGCCGCGGAGCTCGGGGTCCCGAAAAAAAAAAAAAAAAAAAAAA
TP27621	A/G	2U	9.65	TGCAGCTTTGTTCTCCCCATTCAAGCAACAATGTGGTCAGGCCATGGTCGATGTCGAGTCGGGG
TP45053	C/G	2U	9.65	TGCAGTTGCACATCCGCGTACAGGCACGCAAATTTAGTTACACCTCTGTGTACGGGCGCACAAC
TP7707	C/T	2U	10.01	TGCAGATTGGACTGGAGAGAAGGCTTCATCACGACCTTTACATGCGATCCAGAACAGGACACTT
TP3096	C/T	2U	10.36	TGCAGACCTGGCCAGCACGGTTTCGGGGGTCACCGTGGCCGCGGTGAAATCCGAAAAAAAAAAA
TP40278	C/T	2U	10.36	TGCAGTCAGCTGGTGGTGGAGCTGCCGTGTTGTCTGCGACCGTCACCCTCATTGTCTGGCGCTT
TP17619	C/T	2U	10.56	TGCAGCCTCAGGTCGTCCAGGACGGGCGCGGCCGCGGCCACCTTGGAGCACCGAAAAAAAAAAA
TP31777	C/T	2U	10.9	TGCAGGCCGTGGGCGAACTCGCCCGTGGGGTGCCCGCGCCGTCCGTCGTTCCTGTCAGGTCTGA
TP42764	A/C	2U	10.9	TGCAGTGCGCGACGCCGCTCCCCCTGCTGCGGCACGTGGCGGGAGCCATGGCCGCCGAAAAAAA
TP31205	A/T	2U	11.52	TGCAGGCCAAGGTTGCAACCACACCAAAATGATGTATTAAATCACCAGACAAGTACTCTTTACA
TP44828	A/G	2U	11.52	TGCAGTTCTTAAGCCTTCTTTGCGTGGGATCCACTGATCTCTTTGAATCTGGATCTTTGTACCA
TP722	A/G	2U	11.88	TGCAGAAATGAATAGACGCAGTAATGAGCGCCCATGCATGGACCATGCATTGCTCCATGCCCAT
TP12279	C/G	2U	12.24	TGCAGCAGGCTGCGTGATCATCCTGCGACATCATACTGGAGCTCTACAATGTGATGTGTCATGT
TP1229	A/C	2U	12.24	TGCAGAACGTTGGAATGAGGTATTGCTCAACTTGTTGCCCACTCAACGCCCCAAGAAAGGATGC
TP33032	A/G	2U	12.24	TGCAGGCTGCCTGACCTTCTTCTGCCCATGCGTCGCCTTCGGGAGGATCGCCGAAAAAAAAAAA
TP7781	G/T	2U	12.24	TGCAGATTTACAGTGGATGATCAGAGAATAGTGTTTAGCGTTTTGTATGGACTGGACTGATTCC
TP28799	A/G	2U	12.6	TGCAGGACGACGCTGACCAGGACAAGGAGCAGCACGATGTTCCGAGCCATGGAGGCCATCGATG
TP26902	C/G	2U	12.95	TGCAGCTTCCTCAAGATGAGTGGGAGCCCGTACCTGGGCGTCAGAGTGATGAAATTGCTGGGCT
TP45473	C/T	2U	12.95	TGCAGTTGTGTCTGTGTGTCTGCACTTTACCATAGCCGTACTCTTTCTCGGGTACGCTCCGAAA
TP27073	C/T	2U	13.32	TGCAGCTTCTGCTTCTTCCACAGCCGCGCGCTCGCCCTCCCCTCCTCTCTCGCCGTGGAAGAAG
TP45079	C/T	2U	13.32	TGCAGTTGCAGGTGAACTCGTGAGCCAGCTCATCTCCTTCCTGATGAACAAGTACAACTCCTTG
TP31473	A/G	2U	13.65	TGCAGGCCCTAATGCCGCCCCAATCTAGCCTGCCACAGCCAGGCCGAAAAAAAAAAAAAAAAAA
TP34216	C/G	2U	13.65	TGCAGGGCCTCGTCAAACTAAACAGTTCAACTGCAAGTAGCTCCACAACAGAAAAGTTCAGGAA
TP35304	A/G	2U	13.65	TGCAGGGTAAGAGCTGCGGCGCGGACATCGCACCACCGAAAAAAAAAAAAAAAAAAAAAAAAAA
TP41985	A/G	2U	13.65	TGCAGTGAACTAGCAGAGCTGCACTACTCAGTTAGGCAAAACATCACATAGCAATGGAGCATCA
TP5084	C/G	2U	13.65	TGCAGAGGTCAATTGGTTATACTATACGGGTTCTTCCATGAGTTTTCTCCGAAGGAAGGTGAGA
TP8127	C/T	2U	13.65	TGCAGCAAAGAACAGTGGTTTGCAAGGCACATGCGGACGCGTGCACACGAGCGGGGAATGTCCC
TP9495	C/T	2U	13.65	TGCAGCAATGGTGTCGTTGTCGGGAGCTGGAAGGAGACGTTGTTCACCATGCCCATCATATTAG
TP31275	A/C	2U	13.67	TGCAGGCCACTGTAATTGTGTGGATCCAGCTTCACAGCTACCCTGTACTGCTAACACTATTATT
TP36854	C/T	2U	13.67	TGCAGGTCTAGTCTCATCTGAAATGTCTGAATCTGGAGGGCTAGAGCCATCTAAATCTCCTGAA
TP5087	A/G	2U	13.67	TGCAGAGGTCACGTGTTCGATTCCAATGCAAGCCTTTCTTATTTTTGCATCTTTTCATTCCGCG
TP13818	C/T	2U	14.03	TGCAGCCAAGAATTCTCTCTCCACTTAACGCAAACGCCACGGGAGGCGTGGAGCTCACTTAATC
TP25456	C/G	2U	14.03	TGCAGCTGCATGCATGCATGCCTGGATCGGGCACAAAGCCGTACAATACACTCCGTGTACTACT
TP17921	A/G	2U	14.39	TGCAGCCTCTCCATCAGCTTCTCCTCCGAGCGTGAATGGCTTGAGTGGTACTTGTTCATCAGAA
TP4896	C/G	2U	16	TGCAGAGGCGCATGGCGGCGGCCTCCTCCTTCGGCTCCCGCTCCTCCGAAAAAAAAAAAAAAAA
TP35482	A/G	2U	16.4	TGCAGGGTCTACACTCCCGAATGCTAGGGTCTTAAAAAGATACCTAAACTCATCATAAGACAAA
TP1487	C/T	2U	16.8	TGCAGAAGAGTTGCTTAAGCGATTATCTGTTTCTTTATTCAACCCTGAATTTCACTTGCGTCAT
TP4014	A/G	2U	16.8	TGCAGAGAGACCTACCCATGGCGGCGGCCATGGACCATCCCTACCCATCCTCCCACTCCGAAAA
TP42570	A/G	2U	17.42	TGCAGTGCATGGTCATATGTAGCCAAGCCATTGAAGACCGAAAAAAAAAAAAAAAAAAAAAAAA
TP8605	C/T	2U	17.42	TGCAGCAACCTGGTGAGCACACCACAATCAGAGCCATAGTCACCACACCACAAGTTCGGAGGAG
TP12133	C/G	2U	18.21	TGCAGCAGGAGGCCGTCCAGGCCCTCATCGCCGCACTGTCGTCCGCCCCCCGAAAAAAAAAAAA
TP15972	C/T	2U	18.21	TGCAGCCCGATGGGGCGATGCAGCGGTAGCCGATTGCTCGATCGGTATAAATGATGCGTTGTAC
TP24235	C/T	2U	18.21	TGCAGCTCCGATGATGTGTGAGTAGTTTACCGCAGACCTACAGGTCTATGATACCTCCTTTTAT
TP41829	C/G	2U	18.21	TGCAGTCTTCCGCCGCCGACGGTGTCCAGTCCAACTCGTGCACGAGCGCCGCCAAGAAGCACTT
TP42284	C/T	2U	18.21	TGCAGTGATGGGCCCCACCGACTCTTTGTAACCCTAGCCCCCTCCGAAAAAAAAAAAAAAAAAA
TP45577	A/C	2U	18.21	TGCAGTTTAGCCATAGGTGCGGCGCGAGTTCAACCGCTTTGCCTAGCAGCAAAATGCTTGTATT
TP5159	C/T	2U	18.21	TGCAGAGTACCACCGATCATCACCCACCGATGACGAGTTTCACGCTTCCATCATACCACCGAAA
TP25382	C/T	2U	18.55	TGCAGCTGCAAGCTGTTGCCGCGGTCCTGGCTCTGGTGGCCGAAAAAAAAAAAAAAAAAAAAAA
TP5839	C/T	2U	18.64	TGCAGATATCCGCCGTGAGGGATGTACCTGGATGCTGCTCGAGTGGCCGCGGCATCGAGCTTGT
TP1902	A/C	2U	19	TGCAGAAGTCATAAATATGAGGTGCTTCGGTATGCATGGAGAGAAGAACAACGATAATTACCAC
TP40872	A/C	2U	19.22	TGCAGTCCCTTCGGATGGTCATAGTCCAAATCAGATTGTCGCCGAAAAAAAAAAAAAAAAAAAA
TP45466	A/G	2U	19.22	TGCAGTTGTGGGTGAAAAGCTACTGTACAAGAGTGTGCAACTTCGCAGTCCCCGCATGAGCAAC
TP15035	C/T	2U	19.36	TGCAGCCATTGTGACCTCGCCGTCCAATAGTCCAAGCAGGGCCAGAGGACCTCCTCGCGTCGCT
TP41062	A/C	2U	19.36	TGCAGTCCTTACCAAACCATAGACACTCCACACCACTGCCTTCCGCAACCTAGTTCTACTCTGG
TP42887	C/T	2U	19.36	TGCAGTGCTCCAAGCCGCTACAGTGTTTAGTGTGTACGACAGAAAAATGTGAAACAGGAACCTA
TP8081	A/G	2U	19.36	TGCAGCAAACATGTCATTAATTAGGTTTCAACTCACTTATTGGATCCGAAAAAAAAAAAAAAAA
TP40433	A/G	2U	20.63	TGCAGTCCAAAACAGTTCACCTTGAAAGATTCAGTGTTGAGTAGGGAGATCCAGAGGCCGAAAA
TP2328	A/T	2U	20.94	TGCAGAATTACTCCCGCAACACATATTTGGTGGAGCCAGTGCAACACGCCACTGACCCTTGCGC
TP17578	A/G	2U	21.74	TGCAGCCTCACCCATTGTACTGATGGGTTTGGGCGTTGAGGAAGGTGGAGCAGATAGTTATCTG
TP42948	C/T	2U	23.97	TGCAGTGCTGCTCCCCGTGCCCGTTGAAGCCGATGGACGCTCCCGATCGAGTGGAGTCGAGTCG
TP31749	G/T	2U	24.69	TGCAGGCCGTCTGTTGGCTGCGCAAGGGCGAGATGCAGTAGTATGCTTGCGCATCATGGAGGTG
TP27187	C/T	2U	26.99	TGCAGCTTGCAAGCCAATCTCGATCGGAAAACCGCGCGCAGTGTACCAAGTGCTCCGTTTGACC
TP30372	G/T	2U	26.99	TGCAGGATGCATGTGAGCACCGCATGTAGGTACGCACGTACAGAGCCTAGGGGTGCTGGCAGCG
TP6096	A/G	2U	26.99	TGCAGATCATGTCCAACGGCAGGTTCAAGAGCGTGGAGCACCGCGTCGTGGCCAACACCGTGGG
TP882	C/G	2U	26.99	TGCAGAACAACCCAAACATGTGCCCCTACATGGCGCCCTCCCTGGACGCGCGCCAGGACATCGT
TP1226	A/G	2U	27.15	TGCAGAACGTGCTCTCCGCACTCGGCGGTGCCACAGGTGCGCGTCCGCGAAAGCCGCAGCTTGC
TP32529	G/T	2U	27.15	TGCAGGCGGGGGCGGACGTGAGCATGATCGGCCAGTTCGGGGTCGGCTTCTACTCGGCCTACCT
TP15964	C/T	2U	27.78	TGCAGCCCGATCCCGTTGATGGCTTCGAAGACATACAATATCTGGTACCTGCACTAATAGGGTT
TP24363	C/G	2U	27.95	TGCAGCTCCTCCCATCATCTTGGCTTGTAGGTCGCCACTGTGACAGAGCCGAAAAAAAAAAAAA
TP29274	A/G	2U	27.95	TGCAGGAGATCTGTTTGTGACCGTTGGACATCTGATCAAACGGTTCACGGAAGTTCGTATCATG
TP29376	C/T	2U	27.95	TGCAGGAGCACGGTGAGGAAGTCGGCGTCGGAGTGCCGCGGGGTGCCGAGGGTGAGCTGCGGCT
TP4372	A/G	2U	27.95	TGCAGAGCATAATAATAGTGCGCCCCTGCAACGGGCTCGCCACGACGGTGCAGGTGAGCTACCA
TP940	A/C	2U	27.95	TGCAGAACACTAAGAATTTGTGGGCGAATTTTGGGGATTTCTCATTCACGCAGAGTAGCTCGAA
TP30158	C/T	2U	28.93	TGCAGGATACATCGGTGGGGGAGATGCAGCCAGGGCGAGCCGTCGGCTTTGTCGACGCCGTGTC
TP35585	C/G	2U	28.93	TGCAGGGTGCTGGTGCGTGCGTTGATGCTCCGTCTCCAGGTCATGAACTAATTTGTCAGATCCC
TP45686	A/T	2U	28.93	TGCAGTTTCAGGAGACGGATACTAGGGATGAAATTCACCGTTCCATTTCCTCCAGAACGTGCAT
TP24120	A/G	2U	30.37	TGCAGCTCCCAGTAGCATAAGCCCCCATGAGGCCCAGGAGAGCGACGGCGATGAAGGTGTAGAC
TP31492	A/G	2U	30.37	TGCAGGCCCTCTCCACAGAGATGTCGGATCATTGTCCACTGCTCCTTTCGTGCGATGCCGAAAA
TP35076	A/G	2U	30.37	TGCAGGGGTATGGAGGCCGACACCAAGATCACCAGTGTCAACACATAGATGGAAGTCTTGAGAT
TP36109	A/C	2U	30.37	TGCAGGTAGCTATCTTCTGGTACATTCGCATCTACATGAAAAACAACGACAACAATCATGATTC
TP37998	A/C	2U	30.37	TGCAGGTTCGAATCACATTTTTAGAGGTGTGGGAAAAAAAACCGAAAAAAAAAAAAAAAAAAAA
TP4646	G/T	2U	30.37	TGCAGAGCTGCTCGTTGCCTCTCGATGTGGCAACAAGGCAACGTCACGAGAAAACAGCAGGACG
TP5960	A/G	2U	30.37	TGCAGATCAACTTGTGCACCATCTCGAGGTTGGCAACAATGTCCGATATGGCCGAAAAAAAAAA
TP22436	A/T	2U	32.12	TGCAGCGTGCTCAGCGCGCTGCTCTTCGAGATGGGCCCGCTGAGGTTCGTGATCGAGCCCTACG
TP4403	A/C	2U	32.12	TGCAGAGCCAAGCTATACCGCCTCTGCCTCCATGTCAAGTCACACCGAAAAAAAAAAAAAAAAA
TP11037	A/C	2U	32.24	TGCAGCAGAGTATCGCCGTTCCGCCACACGCAGTCTTCATACCTCAACCACAGAAATCTGTGCA
TP37894	A/C	2U	32.24	TGCAGGTTATTTTTAGTTGTACACACTCGCTTCATACATGGTCTACGCTACAACGACCGAAAAA
TP39357	C/T	2U	32.24	TGCAGTAGCACCCCAACCAGCGGCCAATCATGCACGCCCCGACCATCACCGCGTGAACCGAAAA
TP44908	A/C	2U	32.24	TGCAGTTGAATCAACAAGAGTTACCTGTAATGTCATTGAAAAACGCTCTGCTTTTGGCATGTCT
TP29382	A/G	2U	32.45	TGCAGGAGCACTTGGGAGATTTCAAGGAGTTTTGGCATGTTCGTACATAACGAAGTTGAGTTGC
TP25441	G/T	2U	32.6	TGCAGCTGCACTAGTACGGGGAGGAGAGGAGAAGAAACCGAAAAAAAAAAAAAAAAAAAAAAAA
TP30189	G/T	2U	32.6	TGCAGGATATCTTCGGGGAAGTCGGCGAGTCGGTCCGAAAAAAAAAAAAAAAAAAAAAAAAAAA
TP30456	A/G	2U	32.6	TGCAGGATGGTTGTACTCAACGAACGTGAGCTGCTCATCAGGTTTCCTCGTTACCGAAAAAAAA
TP38720	A/C	2U	32.6	TGCAGTAATCACCATGTTGTCGCACCAACAGGCGCCAGGGCGGCCACTTCGGCCGAAAAAAAAA
TP43932	A/G	2U	32.6	TGCAGTTAACATGATCAGATAATCAATCTTTTGGACCTTAAATATTATTGGCTGATACTCATAA
TP11772	A/G	2U	33.8	TGCAGCAGCGCTACGTTGAAGCAGTAGCGTACCTACTGCTGCCGTGGCATTCCTGTGATCCAAC
TP2058	C/T	2U	33.8	TGCAGAATCAAAAACCCCACCGCAGCCGCAAAGGGCACTTGATTCCTCGCCGAAAAAAAAAAAA
TP2622	A/T	2U	33.8	TGCAGACACTCCCCTTCTCGAAGCTCCCATCCCGCAGCCGAAAAAAAAAAAAAAAAAAAAAAAA
TP45136	C/G	2U	34.12	TGCAGTTGCCGAGGTACAGGGACTGGAAGTTGGCCTGGCTCTTTTGGATGACCACACGTACGCT
TP13805	A/G	2U	34.13	TGCAGCCAACTCGTAATAGCACAAAGAGACGTCGAGGATGGAAAATTATTACATCTGTTGGATG
TP18112	C/G	2U	34.47	TGCAGCCTGCCTTTTTTTTTCTTGTTTGTCTTATCCTCTGACCAATCTTTCTCCACCTCTCTTT
TP41769	C/T	2U	34.47	TGCAGTCTGGTGCTTTTCACCCCTACCAGTAGGGCATTCTCCTCCCTTTAGCCCATCTTCCTTT
TP12707	A/G	2U	34.48	TGCAGCAGTGGGACGAACTTAGTGCTAACAACACTCATATATATAGTGATGGCGTTCCAATTCA
TP15103	C/G	2U	34.48	TGCAGCCCAACGTCGCTGAACGCCACCGTGAGGAAAACCACAGCCGCGAAGAAGGCATGCATGA
TP19149	A/G	2U	34.48	TGCAGCGAGTACCACTTGACTATTCATTCGGGCGCCGTTGGATTCCCGTCGGAGTCCACTTCAG
TP19764	A/G	2U	34.48	TGCAGCGCCATAGTAAAAATGCACATGTAATTTAGGAAACAAATATTCATATTCTTTTTAATAT
TP3417	C/T	2U	34.48	TGCAGACGGGAATCCCATCGGTGACATCACACGAAAACCTTTTGAGAAGCAACTATGTGCGTGT
TP38960	A/C	2U	34.48	TGCAGTACCCTAGCATTTGCTTTTGCAAGTGGGTACTATATATAGCGGCCACAACATTGTCGTA
TP4361	A/T	2U	34.48	TGCAGAGCAGGGTGGCTTGGGTTTTAATCTTCTTTTTAACAGTGAAGAGTTTTGTCGAATTTTG
TP5362	A/G	2U	34.48	TGCAGAGTGGAAGCGCCCAAGGTTGTTGTGGTGCTCTGCGGACGCAAGATTTCTGTCCGAAAAA
TP7641	A/C	2U	34.48	TGCAGATTCTTCTCTGTCACACCTTTGCATCCGCCGATTCATTTTATCAGAACGAATGAGAAAT
TP13145	C/T	2U	34.84	TGCAGCATCTACCCTGAAGTCATAGCCGCTGCTCCATTGGTAGATGTCTAAAGTTGTTGTTTGT
TP15817	C/T	2U	34.84	TGCAGCCCCTCCGCCATCTCCCCGCCGCGACGAACGAACTGGACGAACCTGTCCACGAGCGACG
TP17450	C/T	2U	34.84	TGCAGCCTACCTTTTTTTTCTTGTTTGTCCTATCCTCTCACCAATCTTTCTCCACCTTTCCTCA
TP45975	A/G	2U	34.84	TGCAGTTTGTATAACGGGCTAATGGAAATGATGGGCGGCAGAAGGACAGACGGGTGGCATCGGA
TP15110	A/T	2U	35.15	TGCAGCCCAAGAACTAATGGGACAATTCTCCCGAGATGATTGCCCCTAAATGTTTTGATGTTGC
TP27600	C/G	2U	35.15	TGCAGCTTTGGCAACCGTTTAGTTGCTCCCAGGATAGAGGCGCCATCAACACCCTTATTGTGGA
TP21020	A/G	2U	35.19	TGCAGCGGCATCAGCCAGAGGTCGTGCAGCCCGTGCATGGCACCGAAAAAAAAAAAAAAAAAAA
TP32032	C/T	2U	35.19	TGCAGGCGAGGCGAGCCACCAGGCGGCGGCCTGGGGTCTCCCCGCGGCGCATCTCGACCGAAAA
TP4578	G/T	2U	36.71	TGCAGAGCGGTTGGCGGAGACAAGAACTTACCGACGGCGACGATCCGAAAAAAAAAAAAAAAAA
TP6605	C/G	2U	37.43	TGCAGATCTGCTATGCTGACCCACGGATGCGAGCACAGGTTGCCGCCGTCGCCACATTGAGGCC
TP22410	G/T	2U	37.79	TGCAGCGTGCCAGTGGGATTAAGAAATACTGACCTGGGCCAAAGACGAATCTAAGCGAAGTCGT
TP28488	C/T	2U	37.79	TGCAGGAATTGAAGGGCGGGATCTACTCCTGGCATGCATGCATTATTACCGAAAAAAAAAAAAA
TP30112	C/G	2U	37.79	TGCAGGAGTTGAGGTTGGGCAGGTTCAGGTGAAGGGGGACCGAATGGAAGCAACCGAAAAAAAA
TP35497	G/T	2U	37.79	TGCAGGGTCTTCCCCTGCTTTGGTGGTGGCGGGCAGGCGGTCACCTGACTAGATCTGGCGTAGT
TP38193	A/C	2U	37.79	TGCAGGTTGCGGGGAGGCCCCTCGGACTGTAGAGTACCTCCCCTCAGAGGCCGTGGCGACGGGA
TP42484	G/T	2U	37.79	TGCAGTGCAGCGTGCAAGTGGCTGGCTTCTCCTGCTTGTAGTTCTTTCCTTTTGATTTATAGGG
TP45776	C/T	2U	37.79	TGCAGTTTCTCATGTATCACTATATCCCAATTCCTCATGTAAAGACATTATTAGCAGTAATTAA
TP45991	A/C	2U	37.79	TGCAGTTTGTGCGATGTGGGTCAACAAAACGACGGACCAAGGGACCAATTACAACTGCGACAGC
TP11379	C/G	2U	38.01	TGCAGCAGCAGGGGAGCCGCGAGAAGCAGCGTCGGCGACAGATCTCATGGGAGCAGGCCACTCT
TP13150	C/G	2U	38.01	TGCAGCATCTCAACTAAGCCTAAGCACCATGATCGAGGATATATATGCAGGTTTTTGCACATTG
TP19998	C/T	2U	39.66	TGCAGCGCCTAACTCCTCCCGCGGAAAAAGATGCGGAATCGGAGCGAGCGCCGAGGAGCGCCGA
TP23910	G/T	2U	39.66	TGCAGCTCCAACGTTAGTCCTTAGGGGCATATACATGAAGACTTTCCAGCTGTCATCGACAAAG
TP2625	C/T	2U	39.66	TGCAGACACTGAAATCGTAAACAGCACACGGTGACAGAGCGAAATCATGGGGATTTCAATGGAG
TP19378	C/T	2U	40.74	TGCAGCGCAAGACAGTGGAGTCGTTGCTCCATCTCCTTCCTCCGTTGCTGAAGCTGAGCCAGTC
TP22729	C/T	2U	40.74	TGCAGCTAAAGACTCTAATTCAGCCAAGGAGCTTGAGCGACTCCTGTTCTTCCTCTGCTGGCCC
TP29759	C/G	2U	40.74	TGCAGGAGGCCCTCGTCGACGTCGGCTGGGTCTGGGTCGGCATGCCCGTCATGGTGGTGAACCA
TP14504	A/G	2U	41.94	TGCAGCCAGCAATTCCAGCGTCTTGTGTCTGCGAGGATCCCCAACGCGCAGCAAGCATCCGAAA
TP42238	A/G	2U	41.94	TGCAGTGATCACATGCCGCCCACGGGAGTGGCCTCTCCCTGAACAACAGCTAGATTGATTGGTG
TP45777	C/T	2U	41.94	TGCAGTTTCTCATGTATCATTGTATCCCAATTCCTCATGTAAAGACATTATTAGCAGTAATTAT
TP23584	A/G	2U	42.61	TGCAGCTATTTTCAGTGCACAAGTGTTACTTCCATGACACGAAAACATTGTTATTAGTATGCAG
TP31741	C/G	2U	42.61	TGCAGGCCGTCGGCGAGCTCCCGCGCGGGCTGCCGTCGCCGTCCGTGGCCCCCGTCAGGTGGGA
TP35682	A/G	2U	42.61	TGCAGGGTTCAATATTGTTCCTTCTTAATTTGACAACACATTAATCATGTCATTAATCACTGTA
TP43057	A/G	2U	42.61	TGCAGTGGACGGTGACCGCGGCGCCACGTCCGACACGATGAGCACAGAGTCTCGGGCAAGCTTT
TP17606	A/G	2U	42.97	TGCAGCCTCAGGAGCACATCCAACAGGTCCTCTTCATCTGTGCAGGTGACGCCATCGCCGAAAA
TP46233	G/T	2U	42.97	TGCAGTTTTTTTATGAAACTTTTTGCATATTGTTTGTTCATCATGAAGGCAGAACTCAGATGCA
TP5164	A/G	2U	42.97	TGCAGAGTACCAGAAGCTGCTTGCACAGAGGCTGAAGGAGCAGAGGGACCGCCGAAAAAAAAAA
TP8589	A/G	2U	42.97	TGCAGCAACCTACCTGCTCCCCCTTAAGATACAGCATGAAATTAACTCAACCACTGTACATAAG
TP27162	A/G	2U	43.29	TGCAGCTTGAGGAACACAACTCATTTGGTAGAATAAGATCTTGCAAAATGCATGACATTGTTCA
TP23043	A/G	2U	44.05	TGCAGCTACCAACAATTTTTCTTCAACTAACCATGTTGGTTCCGAAAAAAAAAAAAAAAAAAAA
TP44922	G/T	2U	44.05	TGCAGTTGACCCCTCTCCAGCTGCAAAAGTTTAGTGAGTCATTGCTCCACGAGTCTAGTGTGCC
TP13018	A/C	2U	44.41	TGCAGCATCCCGTGCTTCTTCATCGGGGTGTACACCGTGATCCCAGCGCACAGCAGCGGCGCCG
TP36679	A/G	2U	44.59	TGCAGGTCGCCAGCACTTGTCAATCTTTGCTGCCTTGACTTGCCACCGACGTCGCCGAAAAAAA
TP10680	A/T	2U	44.77	TGCAGCACTCGATGGCGATCACAGAAGATACGCTCGGAGAGGAGGAAGAAGAACACGGAGAATT
TP13867	C/G	2U	44.77	TGCAGCCAAGTCCAACTCATGGCGAGAGGGCAAACCATGTGAGAACGAGAAAAAGGGCGTGAGA
TP40429	G/T	2U	44.77	TGCAGTCATTTGTTGGTATCTTGTCGTAGCAGTATGATCTATCAGAATACACATCAATGCTACA
TP24965	G/T	2U	46.05	TGCAGCTCTAGTACGACAAAGTCAGCGTGGAAGTGTATGTTGGCAATTATTGGGAGCTAATTCA
TP26449	C/G	2U	46.05	TGCAGCTGTCAGAGCTATATGCCGTGAACAGGGACTTGTCGATTCCCTGCTGAGTGTACGGTTC
TP43651	A/C	2U	46.05	TGCAGTGTCGCAATCCAATCATCTGCATCAGTGGCCATTCCCGCCGTCTTCTCACGACGGCTAA
TP2010	G/T	2U	47.36	TGCAGAATACATGGAACGTATCCTCTCGCTCCATCGCACACAGCGGGCATGTATCAGTAATCTC
TP37659	C/T	2U	47.36	TGCAGGTGTCAACATTGTTACGGGGAAGTGGATATTTCGTCACAAGTTCCACACGGATGGCTCG
TP42715	A/G	2U	47.36	TGCAGTGCCTGTCCTCGGAGCAGACGCACTGCCCGTACAGCGCGCACCCGTCGGCGCCCACGCC
TP25498	C/T	2U	47.73	TGCAGCTGCCACTCGTAGTCGGGGTCCTCCCAGTAGCTGCACTTGTACCGCTTCTCTATCATCA
TP2786	G/T	2U	47.73	TGCAGACCAATATATATTCATTGGCTGACAGGGTATAGCGCTAGCTCTCGGATTCATTCCCAGG
TP19230	C/T	2U	48.4	TGCAGCGATCGACAAGAACGAGGCGCCAGCGAACACTCCAGCCACGAGGACAGTGCACTGGTAG
TP38087	C/G	2U	48.4	TGCAGGTTCTCTGAGAACCAGCCTCTATGGACCGAAACATTTTCCCAGTTTCCCTTTTCTCGCT
TP12871	A/C	2U	48.73	TGCAGCATATAGAGGAGCTCCGCGTCAGGTTTGAGGTCATTATCCAGATGAGGCTAGGGCAGGA
TP13669	G/T	2U	48.73	TGCAGCATTTTGTTCTACAAGGAGGACACAGTTCAATTGTGTCAGCAATTGCATTTGTATTTCA
TP2951	G/T	2U	48.73	TGCAGACCCGTCGCATCCGCTTTGGACCTGCACGAATGCAGCACCCAGCGTGGAGGCACTATCG
TP16600	A/G	2U	49.74	TGCAGCCGATGGCATGGCGGTGCGGCGAGGACGGTGACTGGTGATGCTTCAAGGCAGTCCTCGG
TP24769	C/T	2U	49.74	TGCAGCTCGGGCGTGGGTCGGGCGGTGGGGGCGAGGAGCAGGCGGCGATTTGGCCGCGAGGGGC
TP25377	C/T	2U	49.74	TGCAGCTGCAAGAAATGGACCTGGCCGCGATGCGACGACGCCTACAGGAAGATGTGGGAAGACA
TP27922	A/G	2U	49.74	TGCAGGAACCGAGGGGCGAGGCCGAAAGAAGCCAGGCAGAAAAGGAATCTGCCGAAAAAAAAAA
TP31354	C/G	2U	49.74	TGCAGGCCATGCCGCTGGTGCCGCTCAACGACTGCCCGCGCCACGCGCGGTACATGGACGGCGT
TP10202	G/T	2U	50.38	TGCAGCACCTCGCCGCGGTGCGGGTCGTCGTCGGGGGCGGGCCACAGGGAGACGGCGGGGGAGG
TP21827	G/T	2U	50.74	TGCAGCGGTGCCTCTAAGATCTAGTTAGAGGCCTGAGATTCGTTGCAGCTGCTGTTTTTACTTT
TP37799	A/C	2U	50.74	TGCAGGTGTTGTTTCCTTCTTGGAGGAGCTGCCATGGCCGACATTTGTGCCCCTCTTCGAGCAA
TP39069	A/G	2U	50.74	TGCAGTACGGTATAATCTATCATTTGATTTTCAAGAAAAACATGGTGGTTCAGTAAACTAAACT
TP41561	G/T	2U	50.74	TGCAGTCTCAACCGCTTGCTCTTCTCTGTGTTTTTTTGCGTTTTGTTTTTGATTTGATTCGGTG
TP44890	A/G	2U	50.74	TGCAGTTGAACCATTAACCATCTCACTCACTCAGGAAGCACAAATTTGGCAAGAAGCTGAAAGA
TP8311	A/T	2U	50.74	TGCAGCAAATCAAATCTTTATGAGGAAAATACAAAGCTCTGAACTTTCAAATAGATGGTGACAT
TP28171	C/T	2U	51.1	TGCAGGAAGACTAAACAAGCACATAATAACATCACTGGAACATGGAGAGCTCCGAAAAAAAAAA
TP10451	C/T	2U	51.82	TGCAGCACGGACCCGTCGATGTCGCCGTCGCCGCCCTCCCCTCGCCCCCGCCAGAGCTGGAGCC
TP11386	A/G	2U	51.82	TGCAGCAGCAGGTCCTCTATGAGCGCGCCGAGCAGATATGCCCGCGCCGAAAAAAAAAAAAAAA
TP13071	A/G	2U	51.82	TGCAGCATCGACACGCTGAAGATGAACGTCCTGCGATGGCCTGACGGAGCACGCGCGGGCCACT
TP15907	C/G	2U	51.82	TGCAGCCCCTTTCTCGCTTCAGCAACCTGCATATCACGCTGCTCGTCCGTGCTATCCAAGCGGC
TP20787	A/G	2U	51.82	TGCAGCGGAGCTGCTGATCTCTGCGGTTTGGTTATGGATGCTCTTCGCCTCGGGTGCCGAAAAA
TP24004	A/G	2U	51.82	TGCAGCTCCACGCCAGAGCGCTGGAGATCCTAAAGCTGAGCCAGCTCGCCGACCTGAGGCGGCT
TP24065	A/G	2U	51.82	TGCAGCTCCAGGGACGACAATGCGAGAACCCTTAGGAAACAATCACTGAGATGAGCTCCAGGCT
TP29875	C/G	2U	51.82	TGCAGGAGGGGAGATGTGTGACCAGAGGACGGAGGAGCAGACCAACACTATGGAGGCAGCCGAA
TP30950	G/C	2U	51.82	TGCAGGCAGCTGCCATTGGGGAAGGTTCATGGGTGGAGCTTGCCGAAAAAAAAAAAAAAAAAAA
TP345	A/T	2U	51.82	TGCAGAAACAAGGAGCATAACTGAAGTCTAGTGCGATAAAATTTCTACAAGTAGAAAAATTTTA
TP42536	C/G	2U	51.82	TGCAGTGCATATATACGACACAAAAGAAGGGTTGCCATGGAAAACGCTGCCTGAATGCTTATCC
TP4290	C/T	2U	51.82	TGCAGAGCAAGTCGTGGGTCGGCTGAGATGTCATTGACATAGAGAGCGTGCCCTTTTCTCCAAT
TP7468	C/T	2U	51.82	TGCAGATTCAAAACAGACGCGTTGCTCGATACGCTCCGAAAAAAAAAAAAAAAAAAAAAAAAAA
TP9499	G/T	2U	51.82	TGCAGCAATGTCACGGATCAGCCAAGGCCTCATTTCGTTGGGCCCAACTATATCCATAGTTCAT
TP971	C/T	2U	53.33	TGCAGAACAGTTGTTTATAAGGCTTGATTTTGGTCTTCTTTTGGTAACAAATACTGATTGGAGA
TP13425	A/G	2U	54.41	TGCAGCATGGCGGCGGAGACTTTGCGGGCTCGATCTGAGCCCAACCGAGCCCGAAAAAAAAAAA
TP1868	A/G	2U	54.41	TGCAGAAGGTGTGGGAAATGACCCACCTCCACTCGAGGGGTGTTCCATGACGACGTCCCACATC
TP19947	A/C	2U	54.41	TGCAGCGCCGCGGCGGCGGCGGCGGCGGGAGCATAGTGTCGGTGGCGAGCGTGGCCGAAAAAAA
TP30264	A/G	2U	54.41	TGCAGGATCGGAGGAGCGATGGGTCGGTCGAGCAACGAGCAAACGGACGAACCGAAAAAAAAAA
TP29886	G/T	2U	54.75	TGCAGGAGGGGCTTCTTCGGCCTGGCCATGCCGAGGGGAGCCATGGTCACCGTGATCTTCGTTG
TP42042	A/T	2U	55.08	TGCAGTGACAAACACACCATAGAATTTTGGGTGTTACATGACAACGATGCTGAAACATGGTCTT
TP38248	A/C	2U	55.42	TGCAGGTTGGTAATCAAAAGGAGCCAATCGTGTTCAGTCAGAAACTTCCGAAAAAAAAAAAAAA
TP7878	G/T	2U	55.42	TGCAGATTTGGAAGTAGACTAGCCATTCAATCTGCTTTATTTTGTACTCCCTCCGTCCGAAAAA
TP10199	C/G	2U	56.16	TGCAGCACCTCGCCAAGCTGAAGAAGCTCTGGAAGCTCAGCGTCAACGTCACCACCGACGCCAA
TP18076	A/G	2U	56.16	TGCAGCCTGCACGCGTCACGCCGCCGCTTGCCGACGCCGAACACGAAGCCCTTGAACACGCGCA
TP1953	C/T	2U	56.16	TGCAGAAGTTACAAGACGCGATCACGCCTCAACCAGCAAAGCCTCCGAACAGCGGTGTTGCAGC
TP19556	C/T	2U	56.16	TGCAGCGCAGGTGGGGGGCGGGGGGCTACGGTTTGAAGCCATCACAAAGAAGAGCCGTAGATAG
TP20385	A/G	2U	56.16	TGCAGCGCGGGCGGCAGCAACTGGTTCGCCTCCACGGCCACGCCGAAAAAAAAAAAAAAAAAAA
TP24217	A/G	2U	56.16	TGCAGCTCCGAACTGACTAGCGTAGTAGAGGTGATCAGGCTGCAAGCCTCCCACCGAAAAAAAA
TP3794	A/G	2U	56.16	TGCAGAGAAAAAAAAAACAATGAATCATGTTATCCTAACAAGAGTGCTGAGCATAAATCCATCG
TP45288	A/G	2U	56.16	TGCAGTTGGCTGCGGCACCACATGCACCTCCCTCCACTCCTTCACATGAGCTGCAACAGCAGCT
TP8024	C/T	2U	56.16	TGCAGCAAAACGTGATCCACCATTTACAGGGCTGTTTACTACCCCTTTGTCCAACTTTAACCCA
TP13976	A/G	2U	56.52	TGCAGCCACACTAAGTCCTATGCACTTTACGTGAAGTGAAGGAGCGGCCTCCGCCGAAAAAAAA
TP11998	C/T	2U	57.6	TGCAGCAGCTGCTGCTGACGATGGACGATGATGAGGATGAATACCTGAGCTGGCATGCGTAGTT
TP13089	A/G	2U	57.6	TGCAGCATCGCCACGCGGTCGCGAACATCCACAAGGTCGTCCAAGACCACCGCCGCCGAAAAAA
TP15251	C/T	2U	57.6	TGCAGCCCAGATCCCCCTGTTTGTGGGGGGTGACTTCAATCTGATACGCTCGGGTGCCGATAAG
TP16144	C/T	2U	57.6	TGCAGCCCTAATAAAAACCCTACGGGCATAATAGATTTCCCCGACAGCGGGAGCGCTAAATGGG
TP19294	C/G	2U	57.6	TGCAGCGATGCTGGAACCAGCTCGACGGCAAGCTGCAACCTCGCTGCGTCGAGTACCGAAAAAA
TP20595	C/T	2U	57.6	TGCAGCGCTGCTGCTTACTTCAGGTCCGCTGAGCTAGAGCTGGGTGACTCGATGAGCCTTGGTG
TP2172	A/C	2U	57.6	TGCAGAATCTTTTCCTGACTTCTTACTGTAGCTAAGCGACCGAAAAAAAAAAAAAAAAAAAAAA
TP22634	A/C	2U	57.6	TGCAGCGTTGCGGACCAGCATTGCGCGCGGCAGCTGCCGCCGCGCCGCCCGCCACGTGCGTACG
TP23705	C/T	2U	57.6	TGCAGCTCACCTGAGAACTACATGCCTAGTACCTTTGTACAGCACGCACAAGAGAGCATCAGAC
TP23799	C/T	2U	57.6	TGCAGCTCAGGAGGCGATAGCCGCTGCATCACAGTACGACCCCACACTAGTAGGAAAAGGGTCA
TP24370	A/T	2U	57.6	TGCAGCTCCTCCGCCTGCACGCAGCTCCGTCAGAGCCAGCAGGGGAACGGCTGCTCCTCCGAAA
TP25431	A/G	2U	57.6	TGCAGCTGCACGACTGCGTTGTCTCTGAGGGGTATCTCCAGGTCGTGCTTCACGCTGCTCCGAA
TP27016	C/T	2U	57.6	TGCAGCTTCTACGCGCACTCCAGCGGCACCAGCAGCGCCTGCGGAAACATGATCACGCAGCAGC
TP27774	C/T	2U	57.6	TGCAGGAAAGACGAAGATGAAGAAACAACCTAACCAAAAACATATTTTCACACATGCGCATGAA
TP27945	C/G	2U	57.6	TGCAGGAACGCAGGACGTGTTCCCCTCAGCTAAAAAACCGAAAAAAAAAAAAAAAAAAAAAAAA
TP28923	C/T	2U	57.6	TGCAGGACGGGGAATCTCGACCCACAAATGTTATGCACGGTGCTGGTGGACCGAAAAAAAAAAA
TP29346	C/G	2U	57.6	TGCAGGAGCAAGCTCAGGCACTTGCTCGCCGCGGAGGGGGAGCCAGGGAGGGAGCCGAAAAAAA
TP30050	A/G	2U	57.6	TGCAGGAGTCTTCACCTGAGGCGACCGTGGAGGCGGGAGAGCTGGTGGACGGGATGATGGCCAA
TP31734	A/G	2U	57.6	TGCAGGCCGTCATCAGGCAGGGGTGCCCGAAAGAACAAGATGCCGAAAAAAAAAAAAAAAAAAA
TP31948	A/C	2U	57.6	TGCAGGCGAAGCTGACGCCAAGCAAACTCCCATGAAAAAGAAGCTTAAAAATGCGTTCGTGCTC
TP35920	C/G	2U	57.6	TGCAGGTACAACAACAACCCCCCCGCCGCCGCCGCCCAGAGCAAGCCGCCGTCGTCCTTCTTCC
TP36054	A/C	2U	57.6	TGCAGGTAGAAAAAAACCCCGATGTGCTGCTGTACCGAAAAAAAAAAAAAAAAAAAAAAAAAAA
TP36056	A/C	2U	57.6	TGCAGGTAGAAAAAACCCCGATGTGCTGCTGTACCGAAAAAAAAAAAAAAAAAAAAAAAAAAAA
TP37614	C/T	2U	57.6	TGCAGGTGGTGCGTGCGGGTACCAGGGCGACGTGGAGAAGCCGCCGTTCTCCGCCATGATCGCG
TP38954	A/G	2U	57.6	TGCAGTACCCCTAACAAGGAAAGAACAACAAGGACACCACCTCCAGGATAGGCTAATGGCACCG
TP39302	A/G	2U	57.6	TGCAGTAGAGCGACAGGAGAGCACCATGGATGGCCACTTTGCAACAGCGGGGCAGTAGCAGCAC
TP42664	G/T	2U	57.6	TGCAGTGCCGCAGCAGGAAACCGTGTCAAAGGAGGCGGAGGTTTTGTTCGATGTCTTCATGATG
TP43245	C/G	2U	57.6	TGCAGTGGCCTGGATCGATCTTACGGCGACGACAGAGTCGCGGGCCGCAACAGTGAGAATGTCG
TP43578	A/G	2U	57.6	TGCAGTGTATCAAACAAAGTAAGCGGAGTTGGGCGATACAGCGAGTACAGCCTAGCGATTACAG
TP45831	C/G	2U	57.6	TGCAGTTTCTTGCCTTGGTGGACCAACTGTTTCTTCTTCTTCTTTTTTAGGACCGAAAAAAAAA
TP6133	A/G	2U	57.6	TGCAGATCCAATGGTTGACTTCGGCGGTGAGATGTAATCTATGGACGAAGTCTTGATGCATCAC
TP6731	C/T	2U	57.6	TGCAGATGACACGATCGAGATTTGGAGACTTCAGGATACATTATTCATTGGTCAGGCACCACAC
TP9862	A/G	2U	57.6	TGCAGCACATTCGTGGATGGTGAAGCAACGTCAGGGATCTGTAGCTCCCTTTGACCTCCCTTAA
TP25819	C/T	2U	58.75	TGCAGCTGCTCGACCTCAAGACCCGCTCCGCCGCCGCCGCCGAAAAAAAAAAAAAAAAAAAAAA
TP45703	C/G	2U	58.75	TGCAGTTTCATTTTGAGACAAACAAAGTGAACCAGAAGAGAAACACAACAAATCTTACTTTACA
TP31295	A/G	2U	59.11	TGCAGGCCAGCTCCTGGGGGTTGCACCCACGCCTGGCCTGGGGCTCCTCTGCGGACCTTGTTGT
TP13047	C/G	2U	59.47	TGCAGCATCCTCGCACCTGGAGCCCAATCCAACACAAGAATCTCAGCTCAGCACACACTCACTC
TP22159	C/T	2U	59.47	TGCAGCGTCGCCGCGTGCTGGCGCACCTCCACCAGCTCGCCGTAGACCACCGCCGAAAAAAAAA
TP29389	A/G	2U	59.83	TGCAGGAGCAGAGGCAGTGCTGCAAAGTATCCATCGTCAGGGTACGGGTGGCGTAGCTGCAAAC
TP29426	A/T	2U	59.83	TGCAGGAGCATTAAACCGTAAACTTATATTTCCAATTTTCCCTTCTCAACCGATTCGATATGTA
TP44255	C/T	2U	59.83	TGCAGTTCACGCAGATCTGCAACCTCTGCTACCCGTGGCCGTGCAGCGACCCGAGCCACTGGGG
TP44256	A/T	2U	59.83	TGCAGTTCACGCAGATCTGTAACCACTGCTACCCGTGGCCGTGCAGCGACACGAGCCACTGGGG
TP32257	A/T	2U	60.19	TGCAGGCGCTCCCTTCCTGAGCTTCCTCGTCGTTCTTTCGTGCTGTCCCGCCGCCAGCTCGGCA
TP5700	A/G	2U	60.19	TGCAGATACCCCTCCAAGTAAGTACAGTTGCGCAGCGTGAGATCCGTGAGGCACAGCAGAGCGA
TP1184	A/G	2U	60.2	TGCAGAACGCTAACATCAGTCGACTTAGACTTCGCGAAGTCTAAGTCGACTGAGTTCTAGACAG
TP12109	C/T	2U	60.2	TGCAGCAGGAGCACACAAGCCGCACATGCACGCGACATATCACATGGCCAAGAGAGTGCCGAGG
TP32063	C/T	2U	60.2	TGCAGGCGATGAGGGGCTGGGTCGTGGACCACAAGCTGCGGGCCGTAGGTGCGCCGCGGGGAGC
TP45848	C/G	2U	60.2	TGCAGTTTGACAGAAGACCATACGAATCTCAACGAGGTCCGACGAATAGGATAACAGGGTGCCC
TP22089	C/G	2U	61.63	TGCAGCGTCCCCTTCTCCTCCGCCATTCCTTCCGCCAAAAGGGATTCGAAAGCTTCTGCTACTA
TP18765	A/T	2U	61.97	TGCAGCGACCTGGAGAAGCAAGCTGGCTGAATTGACAACGACACCTGCCGCGATAGTTCACGTA
TP19908	C/T	2U	61.97	TGCAGCGCCGCCGCCCCGTGGTTCTCCTCGTGGCTGCACCGACTCGCGCGTCGCCGCTTCGTTT
TP20694	C/T	2U	61.97	TGCAGCGGAATGAGGCCATTGCTGTTTATCTACTGTACTTGCTTTTCTCTGCTGCTTCTGCTTC
TP23484	C/G	2U	61.97	TGCAGCTATCTACGAATGGAAGGAGAAGTAGCTAGTGTGCGTGGCACTACCGAAAAAAAAAAAA
TP34262	G/T	2U	61.97	TGCAGGGCCTTCTTTTGGGCTGGGACAGAAGAAACCCATGGCGGGAAGTGCCACGTGGCCTGGT
TP11467	C/T	2U	61.99	TGCAGCAGCCACCACCGCGCAACCATGGTAACCTCTCATTCCTCTCCCTCCTCGTTGTCTTCCT
TP21163	C/G	2U	61.99	TGCAGCGGCGAGCGCGGAGTCCCCCATAGATGGGAGTTGCTCGTCAACGCAGAGCCAGATGCGA
TP21402	C/T	2U	61.99	TGCAGCGGCTCTGCTTCCCCTGACGCCATGGAAAGAAGGAGAAAGGGAGCTAAAGCTACAGAGA
TP31695	C/T	2U	61.99	TGCAGGCCGCGGGGCACGACGTAGAGCTCGTTCTTCCTCACGACCTTGGAGTAGAGCCGAAAAA
TP41719	C/T	2U	61.99	TGCAGTCTGAGGCCTGTGCCACAGCAGATTCACACACTATCAAGCAAATCGGAATCTTGCAGGA
TP43788	A/G	2U	61.99	TGCAGTGTGTGTCCCTCGGACAACACTCATGCTCTACTGTGCAGAATTCAGAGTTAGCTAGCCC
TP999	G/T	2U	61.99	TGCAGAACATTTTGTGCATTTGCATTTGAAGCGCCATTATGGGCCAACCCGTGGAAGAACATTT
TP83	G/T	2U	62.57	TGCAGAAAAAGGGAAAAACAGCGAGGGTGAAGAAAATCGAACCCGAAAAAAAAAAAAAAAAAAA
TP21392	C/T	2U	62.71	TGCAGCGGCTCGCTAGACACCATCCATAGCTTGGGGGGACTGCTCATCTTGCTCGTGTTGTACA
TP24850	C/G	2U	62.71	TGCAGCTCGTCGAAGACCCACGAGTAGTCGCTGAGGCTACTTTCATCATCACTGCCTGTCCCCC
TP25407	A/G	2U	62.71	TGCAGCTGCACAACGCCGCGTGCTGGGTGTCAACTGCCGAGTGCGGTCTGGGCGGCTGCCGAAA
TP28305	C/T	2U	62.71	TGCAGGAAGGCCGACACCAACGCCGTGGTGGTGCTCCACCAGTCCGACGCCGAAAAAAAAAAAA
TP31481	C/T	2U	62.71	TGCAGGCCCTCCATCCGCGCCGCCATGGCGTCGCCGACGGCCCTGACCTCCCTCTCGATCCCCG
TP3987	G/T	2U	62.71	TGCAGAGACGGTTTGGTAACTTCGATCGGGTTCGGGGCCCTGGTACCGTGCGAGTGCGCCAGAA
TP20055	C/G	2U	62.72	TGCAGCGCCTGGAACGGGGCGCAGAGGAGGGGCTACGGCGGCGAGGCCGCGGATCCAGGCGAGC
TP2188	A/G	2U	62.72	TGCAGAATGAGACAAAAAAGGGAGACAAGAGTGAGAGCAGGGAGGAGAGGAGGTGGAGGCAAAC
TP29694	A/G	2U	62.72	TGCAGGAGGAGCTGTTGGACCTGATCGCGTGGGCAGGTGCTGGCGGTCGACTTCCGAAAAAAAA
TP19840	A/C	2U	63.06	TGCAGCGCCCTATCCGACGCTACAGGCAGCGGACCGCCCGAAAAAAAAAAAAAAAAAAAAAAAA
TP12713	A/G	2U	63.38	TGCAGCAGTGGTTGCTGACCTTGCAGCTTGCAGCACGATGGTAGCTCGCGTATGCGTGGTCTTC
TP15403	A/C	2U	63.38	TGCAGCCCATATGTTTTAAAAGATCAACACTCCCAATCAGCCAGAGATTGACCTGAACCGAAAA
TP20956	C/T	2U	63.38	TGCAGCGGCAGAAGGATGAGTTGGAGAGGGCGGATGCGGCGGAGAAAGACGCGACGTCGGCCGA
TP40346	G/T	2U	63.38	TGCAGTCATCCTGGTTATATTGTCCTTATGTGTTTGTGTTTGCTGGGCGTTTTGACACACTTGG
TP42139	A/T	2U	63.38	TGCAGTGACTTGCATTTTTCTACATTGCTTCGTATTAAGTTGATTGGGACTGTTTGATTGAATA
TP45490	C/G	2U	63.38	TGCAGTTGTTCTCCCGATGGCAAACAATCCTGAGCAAACCTCCACAGCAAAATTTTCATCTTGT
TP5976	G/T	2U	63.38	TGCAGATCAAGTGATTCCATGCGAGGGACAGGGCAGCAAGTAGCAACAAACTAGCAATCCAGGG
TP19076	C/T	2U	63.71	TGCAGCGAGCTGCATTGTCTCCGCCTCTCCGATGAGGTCCGAAAAAAAAAAAAAAAAAAAAAAA
TP29061	G/T	2U	64.51	TGCAGGAGAAAGAGCCGCATATGGTCCAGTAATACCCATTGTAGCAGGATTCTGCATATGATGT
TP44342	C/G	2U	64.85	TGCAGTTCATCATCCTGACTACTACTACTAGTATATTTGGCAAATAAAATTGTGACTACTCTGA
TP38009	C/T	2U	65.4	TGCAGGTTCGAGGTGCTCACCCTCGGCACGGACACATGGCGGCAGACGGCAGACCCGCCGCACT
TP42841	A/G	2U	65.4	TGCAGTGCGTGGTGAAGCAGCGATGCGCGGTTAAGACGGAACATGGCCGCTAACCACTTACTGT
TP6501	C/T	2U	65.4	TGCAGATCGTATTACCGTTGGACCTTGGACTCCGTTATTATCAATCCGTTTACAGATGAGTTCT
TP7875	C/G	2U	65.4	TGCAGATTTGCAATTCGGGTGGGGAAATGAATAAGACTTGCTTGCACTTCTTAAACAACGTGTT
TP31748	A/G	2U	65.48	TGCAGGCCGTCTGCAAGGAAGCCATGCGCCTCCACCCCTCGACCCCGCTCAGCATCCCGCACTT
TP46132	C/T	2U	65.48	TGCAGTTTTGGCAACTTCATTTTGGAAGTTGGGAGAACAACTAAGCCATGCCACATTATTTCAA
TP3060	G/T	2U	65.8	TGCAGACCTCCAGCTGCTCGTTGGCCACGGCGATCAGCAGCGCCGACATGCCGCCGTCGGCCCT
TP3250	A/G	2U	65.8	TGCAGACGCAGTCTGTCGTCGTGCCGCTCGTCGTCTGCTCCATGGTGCCGTTCGCGCTCCACGT
TP35737	A/G	2U	65.8	TGCAGGGTTGTCCCTCAATACGTTTTACATCATGTTTTTCTTCCAACGGAAGCCAGCGGTGGGC
TP36189	G/T	2U	65.8	TGCAGGTAGTTGACTCACCCTGATCCTGGTCTTTATACGAATCCCCCTGTTTGGATACCGACCA
TP37117	A/G	2U	65.8	TGCAGGTGCAACAGGGGAAAAAAATGTGGAAACAGCCGAAAAAAAAAAAAAAAAAAAAAAAAAA
TP3965	G/A	2U	65.8	TGCAGAGACGAAACAAGTCAGTACAAACTACAGAGGCACATCACAAAGAAAGGCTTATTACAAT
TP40327	C/T	2U	65.8	TGCAGTCATAGTATATATTATTGGGTGCATATGTTTCTCACTTTGGGTCCTCTATTTCACCGCA
TP4088	A/G	2U	65.8	TGCAGAGAGGATGCTGTCCTCTGGAAAGGCTGTTTTCCTGCTGCTCGACGCCCTCATGTCGCCA
TP42253	C/T	2U	65.8	TGCAGTGATCGTGTCGATCGCCTGTCCGCTATATGTGTGGTCCAATCCAAGGGTGCCGTCCGAA
TP42671	G/T	2U	65.8	TGCAGTGCCGCGACGGGGGCGCCACCACGGACGGCTTCGCGGTGGTGTCGGGCGTGAAGCTCCC
TP5211	G/T	2U	65.8	TGCAGAGTATTCGCTTCCATCTATCGCGCGCTGTTGGCGCACCCAAATGTTCAAACACTACGGC
TP573	A/G	2U	65.8	TGCAGAAAGCCGCGGCGTCCATGGATCACACAGTGGAGGGCGCCATGAGCGCCACCCTACTGAG
TP32799	C/G	2U	66.12	TGCAGGCTCACCGACGTCTTGAAGGCGGCGATGAGGTCGTCGGCATTGATCTTCCCCTCGACGA
TP7028	A/G	2U	66.12	TGCAGATGCTTGGATCATGTACTACTACCATGGCTACGGCTGTACGGCAGCGGAGGCGTCACCA
TP34192	C/T	2U	66.48	TGCAGGGCCGTCAGGTGCCCCGCCATCTTGAGAGGTTCATCTCCAGCCTCCGCATATGGGCCTG
TP36453	C/T	2U	66.62	TGCAGGTCCACCACCAACAACAGCAAGAAGCCCTCCGCTGAAAGGCAGGGGAATCTCGCTTGAA
TP9671	C/T	2U	66.62	TGCAGCACACATGAAGTGAGAGAAACACATGAGAAATTCTCGTTCATGTTATGAAGGTGGCATC
TP41408	C/G	2U	66.8	TGCAGTCGGTGGCGGCTGAGAGGCGTCGTGGTCGGCGTATAAGCCCAAGCGATAACTTAGGGCG
TP18974	A/G	2U	66.94	TGCAGCGAGACACGGACTTTGTTGCTGCATGCGGCGGGACCAGATGCTAATGGGATCAGGAGAG
TP30852	A/G	2U	66.94	TGCAGGCACTTCATGAGATAATACCAAACGTGATTCACCATTGGTTCAACTCTTTTGGTTTGTA
TP31339	A/G	2U	66.94	TGCAGGCCATCCACGCTGCCTTCGAGCATCCCTATGACTTCGCTCATCGCTGGCCGATCGTGAC
TP34451	C/T	2U	66.94	TGCAGGGCGTCGAACTTGCATTCCTCGCTGATGCTGCATGGGATGTGCACCACCTTGTACTGCC
TP35507	G/A	2U	66.94	TGCAGGGTGAAGAGGTCGGCTGATTGGCCGACGACCTTGTCGTACTCCAGGCCTTCAGCAGCCA
TP36940	A/C	2U	66.94	TGCAGGTCTTGCATCGTCTCCTACTGACCAAACATGCCCCATAATCCGAAAAAAAAAAAAAAAA
TP45600	A/G	2U	66.94	TGCAGTTTATATAGCGGGTGAATGGCAATAGTGGACGGCAGAGGGACGGACGGGTGGCGCCGAA
TP595	C/T	2U	66.94	TGCAGAAAGGATAGAACAGGGGAAACAGACAAGGAGTTGAATCTCAGCGGTACACCCGAAAAAA
TP8862	A/G	2U	66.94	TGCAGCAAGAGGCACTATGGGCTACATCGCACCAGAACTATACTCTAGGAACTTTGGAGGGATA
TP19831	A/G	2U	66.98	TGCAGCGCCCGCTCCATGCGCTACGTGCCCTAGCCACTGCCGCTTCCTGCTTTGGATTGGACCC
TP26071	A/G	2U	66.98	TGCAGCTGGATTACTCGGCGGAGCCGCAGAGGATTGCTGCGTCGACGGTGGTTCCGACGATGTT
TP31045	C/G	2U	66.98	TGCAGGCATCAAGTGCCGTAAGCGGCGAGGCCGTGCATGACAGCTCCTCCTGATCAGGCTCCCC
TP36191	G/T	2U	66.98	TGCAGGTATAAAAAATGTGAAAAGTAACTTCTATATTTTATTGATTTTTGATTTGCCCAGAATA
TP4147	A/C	2U	66.98	TGCAGAGATAGAGTCACCACCGAAGGAAAAATCCCCAAACGATGGATCATCCGAAAAAAAAAAA
TP10521	A/C	2U	67.01	TGCAGCACGGTGTCATCACGAGATTAGGCGATAATTTAATTCCATAAAACGAGAGCTACTGCGC
TP36452	C/G	2U	67.01	TGCAGGTCCACCACCAACAACAGCAACAAGCCCTCCACTGAAAGGTAGAGGAATCTCGCTTGAA
TP40311	A/G	2U	67.01	TGCAGTCAGTTTCAGTTGCCGTTTCTCAGTTACCTGCTCCACTATACCACAAGCACCTTTCTTA
TP12177	A/G	2U	67.2	TGCAGCAGGCAAGCACAACAAACAGACGAACGACTGTGATTCAGAATGGTGATGCGACAGCTTT
TP21434	C/T	2U	67.2	TGCAGCGGCTGTCGATGTCCTCGACGATGTCGGTGCCGTGGTCCTCCCTGTACCGCCGAAAAAA
TP30859	A/C	2U	67.2	TGCAGGCAGAAAAGCTCCATACGAATTTGCATGCCCCCGAAAAAAAAAAAAAAAAAAAAAAAAA
TP3120	C/G	2U	67.2	TGCAGACCTTGTGCAACTATTAATTATCGATGACTAGGTCTAGGTCAGAACTTACGAAAACTGC
TP9895	A/T	2U	67.2	TGCAGCACCACCACAACTTTTCCAGAGTTGTTTGCACCTGGCAGGAAACGCTTTTAGAAGATGT
TP45491	C/T	2U	67.22	TGCAGTTGTTCTCCGAGCAGATCGATGAGCTGCGGCACGAGATGCGCAAGTTGCTGAGATCGTT
TP11803	C/T	2U	67.34	TGCAGCAGCGGCCTCGAGACATCGTGCGGCGCTGCCATTACGCCGCGGCGGCGGCGGAATGAGG
TP12130	A/G	2U	67.34	TGCAGCAGGAGGCAATGGGCGACGCGGAGCTCGTCCTCCTCTCTGCTGGGCGGAGCTACGCAGA
TP12746	C/T	2U	67.34	TGCAGCAGTTCTGTTGTTCATGGATTTAGGCGTGTGATGATGTCCAACCTAGGTATATGCACGC
TP12750	C/G	2U	67.34	TGCAGCAGTTGACTCCTCTCGCAGCAATGCTTCTCCCGCGGAGGGAAGGCTAAGGATTGGGAAG
TP16009	C/T	2U	67.34	TGCAGCCCGCCCATCCCGACGCGCGCCAGCATCCGTCCCGACGTGCAGCCTGGCGGATCTTTCT
TP16348	A/C	2U	67.34	TGCAGCCCTTCACCTTCGCCGAGTGGAAGAACCACACCAGTCTGTCGGCCGACAAGGCCCGCAA
TP19066	A/G	2U	67.34	TGCAGCGAGCGGCGGAGCACGAGAAGCGGGCGTCGGCCGTACACTCTGGCGATGCCGAAAAAAA
TP2085	G/C	2U	67.34	TGCAGAATCATGGCCGACGCGAGGTCGTCTACGAGCTTGATGGCCTTCTTGAGCTCCCTCTCGG
TP2094	A/G	2U	67.34	TGCAGAATCCAACCCATGATTTCCCATTTTGTATAAAATGGACACGAAAACGAATACCGAAAAA
TP21286	C/T	2U	67.34	TGCAGCGGCGGCGTGCTCCTCCTTCTGTCTTGTGTGGTGCCGCTGCGGCGAGGCTGACGGGAGA
TP23913	A/G	2U	67.34	TGCAGCTCCAAGGCAATGGTCCTTAGGAAGACGTGCATGAAGACTTCCTGGTTTTCATCGACAA
TP24138	A/G	2U	67.34	TGCAGCTCCCCCAGCTCTACGATTGTAGCATCGCGTGGTCACCGTCGCACCTTGCCGAAAAAAA
TP25701	C/T	2U	67.34	TGCAGCTGCGGCAACCAAATCTTTCTTCCCAGCAACATAGCCACTGCAAGGCGCAATGGTACCG
TP26541	C/G	2U	67.34	TGCAGCTGTGGCCACGGCGTGGAAATCCTGTATCTGTTTTGGACAAACACCGAAAAAAAAAAAA
TP27695	A/G	2U	67.34	TGCAGGAAAAATTTCGGCGCAATAGATGCACTCGGCTTTCCATTCCCCGTCAAGAAACAGTTTC
TP27731	C/T	2U	67.34	TGCAGGAAACACCGTGGTCACCGCTTAAACGTCCGCAACCTCCATCGGTTCTCACGGCGTCTCT
TP30287	A/T	2U	67.34	TGCAGGATCTCAGCTTTGTTCCACCACAGCTGGCAGATGACTAGCTAGTCGCACCGCCGCCTTT
TP304	C/T	2U	67.34	TGCAGAAAATGCTCATGGATGGATGCGGTCGTTGCAGTAGTGCTGTCGTGCAGTATCTACCTTG
TP30550	A/G	2U	67.34	TGCAGGATTGATGAAATTTGGCATGGATGAGCGCCCTGTATGGACATGGAAATTTGTCGTTCGT
TP31786	G/A	2U	67.34	TGCAGGCCGTTGTTCACTGTTTTGGCACCGATGTGTACCGAAAAAAAAAAAAAAAAAAAAAAAA
TP33492	A/G	2U	67.34	TGCAGGGACACGCTGTCCACCAGAATGTCCACCGTAGCACCATCCGCCTCGAAGAAGAACTCGG
TP33666	G/T	2U	67.34	TGCAGGGAGCAGTCTTTTTCTTCCAAACAGTAGCATTGATTCTTGTTTATGAAATCTCCCCCCA
TP35470	C/T	2U	67.34	TGCAGGGTCGTACACAGCCAGCGTCCGTTTGGAGCCTGCGTGGCCCGAAAAAAAAAAAAAAAAA
TP36009	A/C	2U	67.34	TGCAGGTACGTACATATCCACCACAGTTAGAAGAAACATTTTCATCTTGTTGGTTTTGCAGCTT
TP39214	C/T	2U	67.34	TGCAGTACTTCCCTGTACGCGTACAAGGATATCGTTCCTTCGCTTCGTGGCATCGTGGCCGTAG
TP4144	A/G	2U	67.34	TGCAGAGATACAATGCAATGAACATGGCATGATAATGTCCAAATGTCGGGGACTTAGTGAAAAT
TP42904	C/G	2U	67.34	TGCAGTGCTCCTTGGTGTCGCCGAGCGCGCGCCCGATGTCCGCAGAGAAGCCGATGAGCAGCAC
TP43125	C/T	2U	67.34	TGCAGTGGAGTTTTTTGGGGAGAAGAAGCCGAGAGCAAAGACACCATTGTCCGAGACGAGCTTG
TP43349	C/G	2U	67.34	TGCAGTGGGCACCCCCTTGCCCTTGCCGCAGGTGCCGTTCCCGACGGCCGAGGTGCGGGCGCGC
TP4414	C/G	2U	67.34	TGCAGAGCCAGGAAAGCGCAGCTCCGCAAACTCCCCCCGCTTCGGGAGTGGAGTCCTGGAGCGG
TP44513	A/G	2U	67.34	TGCAGTTCCGATCTTTCCGTCATTTTTGAAAGAGCGGTACGTCTTCAATCCACAAAGATTTAAT
TP488	G/C	2U	67.34	TGCAGAAACTGATAGCAGACAATGAGCAGCAAGCAACGATGCGCGTTGAACGGACGAGGCGGAT
TP489	A/G	2U	67.34	TGCAGAAACTGATAGCAGACAGTGAGCAGCAAGCAGCAATGCGCGTGGAACAGACGAGGCGGAT
TP6301	C/T	2U	67.34	TGCAGATCCGTGGCCTCCCTCGCCGCCACGGCCGCCGCGGCCGCAGCCGCCTCTGCCTGCGACG
TP943	A/G	2U	67.34	TGCAGAACAGAAAATCTATCGGCCAAATAAGGACATGAATAGGCCGTCCAACTCGTCAAGCTAA
TP14333	G/T	2U	67.56	TGCAGCCACTCACTTCAAGAAAACTTTGATGTCCACCAGGGGTGATGACATTTTGCTGCTACAA
TP14664	C/T	2U	67.56	TGCAGCCAGGTAATTACCCCTTGGACGCTGGACATCAATTCCGAGCTTTTCCGACTGACCGATC
TP16431	G/T	2U	67.56	TGCAGCCGAATGAATCGCCACCGCCAGCGCCACCACGAACTCGAACGCCGCCACCAACGACGCC
TP19574	C/G	2U	67.56	TGCAGCGCATCACCGATAACGCTGGCGAAGCTCCATTGTATCACCAACAACGCTCCAATGCATC
TP19662	A/G	2U	67.56	TGCAGCGCCAAAGGGGATAAGGACCAGCCAACGCAAAGCGCCCGCCCGAAAAAAAAAAAAAAAA
TP20226	A/G	2U	67.56	TGCAGCGCGCGCACGGCGGCGTCCCAGCTGCCTAGCACATCGCGGACGAAGAAGGCCTCGGCGT
TP22	A/G	2U	67.56	TGCAGAAAAAACCCTCACCACATGCATTGAGACTGTTTCATAAATGTCATCCATGTTGCAATCC
TP22229	A/C	2U	67.56	TGCAGCGTCGTTACCCTACCCCCTGTCCAACAAGGTCCGAAAAAAAAAAAAAAAAAAAAAAAAA
TP22945	A/G	2U	67.56	TGCAGCTAAGTTCATAACAGTAATGCGTCTCAGGGAAGAAGTGCTACAAGCGCTACAACTACAA
TP2296	C/T	2U	67.56	TGCAGAATGTCCGCACAAAACTTAACCAAGTTGCTTCTGTAAGTCCAAAAGCTTTGATTCCGTG
TP23781	A/G	2U	67.56	TGCAGCTCAGCGCCCAGCAGGAATTGGATGTTCTCCGAAAAAAAAAAAAAAAAAAAAAAAAAAA
TP24673	C/T	2U	67.56	TGCAGCTCGCTCGGCCGATCTGGGTGAGCCGACCATCGCGGGAGAGAAATGAAAAGGGCCGAAA
TP25495	A/C	2U	67.56	TGCAGCTGCCACTCACCTGCACCAAAAACAAGCAACAAGCTAGCAGCTACACTCACCCAACTGT
TP27789	C/T	2U	67.56	TGCAGGAAAGCTATATAGGCAGAATCATTTTCTCTCTCGGGTACACGGCAGAATGATTGGCTTG
TP3739	A/G	2U	67.56	TGCAGACTTACCAAACACAACTATAGTGCCCTCATGTAAAACTCATGCACGTACGCATGAAAAT
TP38115	C/T	2U	67.56	TGCAGGTTGAACTTCTGGCAGATGTATGCACCAATTCTCCCTGTAACTCTGACCAAAACCAGAG
TP38308	A/G	2U	67.56	TGCAGGTTTAATCAGAACTCGACCATGTCTCATGCACGAGGAGTTGGGGATCAACATGTGCCCT
TP38376	A/C	2U	67.56	TGCAGGTTTCTGTTGCCAACTTCTCAACACTACTAGCTAGAAACGGCCGTTGTCCCCTGAGCAG
TP39048	C/T	2U	67.56	TGCAGTACGCCTCCACCCCATACGTTTTGCATGCGCTCCAGGTCCAAGCATGCCACCTTCACCT
TP41513	C/G	2U	67.56	TGCAGTCTACCATCACCCAGTCCTCGGGAAGATCGAGCTCCTGACAGCCGTACAACAGAAGCGG
TP41737	C/G	2U	67.56	TGCAGTCTGCCTGCGAGGGCTGCTGTGTTGCACCGCCGCCGCGCACGTATCGATCAATGGCCGT
TP43717	A/C	2U	67.56	TGCAGTGTGCACATATTGTAAATGTTTTATACGACGGTCACTTTCGCTAACCAACGCGTATATC
TP4987	C/T	2U	67.56	TGCAGAGGGACGTCGATCATTTGCTACCGTCCCACGTGCATCCGACGGTGGCCGAAAAAAAAAA
TP5175	C/T	2U	67.56	TGCAGAGTACTACTCCTATATATGCCAATAAATGTATGACAGGTGATTGATTACAAACTTGAAA
TP6568	A/G	2U	67.56	TGCAGATCTCGACCCCCTCACTCGATCGTGATTGGGGTTCGAAGGGGCTGGAGCGAATCCGAAA
TP7794	C/T	2U	67.56	TGCAGATTTAGTGGGTCTCGAACTCTGCCTATGTCTTCTAAGCATAGCCGAAAAAAAAAAAAAA
TP9239	C/T	2U	67.56	TGCAGCAAGGTGTTGGCCTTCCTGGAGTTCCTTTGCATGCCATCATTTGAGGTCCACTATTGCT
TP16474	C/T	2U	67.68	TGCAGCCGACGGCATGGCGGTACAGCGACCGACGGCGAGTAGGGCGACCGAAAAAAAAAAAAAA
TP18121	G/T	2U	67.68	TGCAGCCTGCGCGCCACGCTCCTCTTCCCGTAAGAGCTTCCCTGATCCGTCGCCGAGGAGCTCA
TP22424	A/G	2U	67.68	TGCAGCGTGCGGATCCTCTCTTCCATGCAGATTGCGGCCTGATAGAACTCCTCGCTTAGCTCTG
TP2246	C/T	2U	67.68	TGCAGAATGCTGATATTTCTGGTGAGTCTATGGGTGGTTTGTCACCAACAAAGTCCGAAGAAAC
TP32798	C/T	2U	67.68	TGCAGGCTCACCGACGTCTTGAAGGCGAGGACTAGGTCGTCGGCATTGATCTTCCCCTCGACGA
TP36331	A/G	2U	67.68	TGCAGGTCACCATTAGCCCATTACTTTATGGATGTCCGAAAAAAAAAAAAAAAAAAAAAAAAAA
TP42737	C/T	2U	67.68	TGCAGTGCGACCTGATATGTCAGTACTAATCTTGATGCATATAGTTAGTTGGTTAGTGGATTGA
TP4849	C/G	2U	67.68	TGCAGAGGCAGCCCCTTGTACTCCATGACGGCCGCCACGTCGCGCGCCAGCGTGGAGCGGATGA
TP6351	A/C	2U	67.68	TGCAGATCCTTCTCACCTGCTTCTATTTGAAAAAATATTGCACGGAAGCCTTGGCACAGCAAAA
TP21890	C/G	2U	68.02	TGCAGCGGTTCTCTTTTCAGCTGTCGCCGACGTACGTGCACGCGTCGTATGCCGTCTTCTGCTT
TP43412	A/G	2U	68.02	TGCAGTGGTAAACATGTTTAAAGAGGAGTGCTTGAGCGAACCAAATCTCCGAAAAAAAAAAAAA
TP5337	A/G	2U	68.02	TGCAGAGTGCAGACCTGGCCAATGGCGGCAGGGGAATCAGAGGGAAAGGAAAGGCCGAAAAAAA
TP8445	C/T	2U	68.02	TGCAGCAACACTTCGCGAGACAACGATGAGATCAGAAAAGTAAGAACTTGCCGATCCTGCGTGA
TP13271	A/G	2U	68.03	TGCAGCATGAGTTGCCAGGTCTCATTCCAGAGACATTTTTTGTCTGTTTTTTCATAGAGTGAGT
TP256	A/T	2U	68.03	TGCAGAAAATAAAATGATAAACCGAGGCACAATGATTAGAAAGGTAGCAAAAAAGATAATAGCA
TP30947	A/G	2U	68.03	TGCAGGCAGCTGAGGGCGGTGCACGGGCGAGGGCGGCAAGAAAATTGTTGAGCGTGCGTACTGA
TP31496	G/C	2U	68.03	TGCAGGCCCTCTTCGTGTGTCTGCCGCGATAAGATATCCACCGTCCGCCGACCGATCCAGCGAT
TP34364	A/G	2U	68.03	TGCAGGGCGCGTAGTGCGCCGAGCCAGCAGCGAGACCCAACGCCCGCACCATCGTAGCTGCTCG
TP35889	C/T	2U	68.03	TGCAGGTAAGCAACCAGCAGTTGGGTAGGTTTCATCTTGCTGCTTTTACAGCTTCTTAATTACT
TP3608	C/G	2U	68.03	TGCAGACTCATATGTCCGCATATGGTACAACAACATCCCCAAGCGCACATATGTGTGGGTTGCT
TP38362	C/G	2U	68.03	TGCAGGTTTCCTGTACGAGATTATATTTTAAAGCTTTTTTTTACAAAGCTGTCCATATTCTCCC
TP45366	C/T	2U	68.03	TGCAGTTGTAAAGGCTGCAACTTATCTCGCTAAACTTGATGCAAAACAGCTGTCACTTGAAGCT
TP5830	C/T	2U	68.03	TGCAGATATAGCGGTATGGTTTCTTACATGGTCTGATCCTTCTCACTTGGACAGTGTCTGCCCA
TP12043	C/T	2U	68.3	TGCAGCAGCTTTGCCAGGCCAGGTTTATTTTCTGTCATGGTTCATGGTGCCTAACTGTATTTAA
TP18565	A/C	2U	68.3	TGCAGCGAACCGCGCGCGGCGACAGATACATGGCGGCGGCGCTCCGAAAAAAAAAAAAAAAAAA
TP23578	A/G	2U	68.3	TGCAGCTATTTAGCTGCAAAGTCTCTGCACAAACTACACAAGGAACTCTGTTTTTCTGAATATA
TP23662	G/T	2U	68.3	TGCAGCTCACACAAGAATTAGACGATGGAAGAGTTTGTGATCTTATGATGTTTTCCATTGGTGT
TP34661	A/T	2U	68.3	TGCAGGGGACGGGCATCGTCGGCAAACAGTTGCGAGCTTGCGAGGACATGAAACAAACACGACG
TP39881	C/G	2U	68.3	TGCAGTATGCGCGCAGCAGAAGAGAACAGACGAGAGAGCAGATTGACTGATTGAGCCACACAAG
TP35045	A/C	2U	69.77	TGCAGGGGGTGGCCGTGGAGAAGCTCGTCTCGTGATCGATCGGCCGATCGTTAGCTCGTAGAAG
TP18837	G/T	2U	70.11	TGCAGCGACGGAGAACGAGCGAGCGGTGCGAGCGAGGAGCGGATAAGGTGGAAGGGTAAATCTG
TP20866	G/T	2U	70.11	TGCAGCGGATTTGCAAATACCAGCAGGCAGGCCTGCCGAAAAAAAAAAAAAAAAAAAAAAAAAA
TP25987	C/G	2U	70.11	TGCAGCTGGAAAGAAGTTAAACATGACAATACTGTTACATGGTTGGCCTTTTGGAATGATCCGA
TP3974	A/G	2U	70.11	TGCAGAGACGCGCGCAAACAATGAGTGAGATCGTTCGCACGGTATAGATGAAGCGGAGTAGCGG
TP43698	G/T	2U	70.11	TGCAGTGTGAACTGGTCGGCTGGTCCAGTGTTCTCTCGTGTGCGCGCCTGGTCCAGCCAACACG
TP44444	C/T	2U	70.11	TGCAGTTCCAGCTTCACGAGAGACGTCTCCGCAGGATCAAGGAAAAACTAGCGCTAGTTCTACC
TP9838	C/G	2U	70.11	TGCAGCACATGGCCTCACAAACTTGAACCGAACAGTGACCTAGATAAGCAAGTATAGTAGCGAC
TP7388	C/T	2U	71.18	TGCAGATTAATTCATGCATGGGTGATAAAAACTAACGAGAATTACGTGTGGCGATGCAGGGTGA
TP31007	C/T	2U	71.52	TGCAGGCAGGTGTACCTGTCGCCGCCCGTCCCGCGCTCATGGCAGCCGTCGCACTTGAACTCGG
TP25477	A/G	2U	71.63	TGCAGCTGCCAACCATGCCACAACTAAATATATGGATTTTGTCCGAAAAAAAAAAAAAAAAAAA
TP25447	C/T	2U	71.86	TGCAGCTGCATACAGAAACCTCATAATCCGTGCGTCGGTCGCCGAAAAAAAAAAAAAAAAAAAA
TP32294	C/G	2U	71.86	TGCAGGCGCTGCTGGAGATTGCCACGCAGTTTCGCCGTGCCTCGAGGGACAGCGACGGCCGCAT
TP40098	C/G	2U	71.99	TGCAGTCAACTGAACTAACCATTCTGTTTCTCTTAGGGATGCTTCACAATTTTATTTCTTTTGC
TP9793	A/T	2U	73.14	TGCAGCACATAGTTTGGCTAGGGAGGGTTGCTTAAATAAATTGTATATAAGACGTGGTTCCGAA
TP17503	A/G	2U	73.27	TGCAGCCTATAGCAAAACATGATCAACAGCCGCCGTCTCCTCCACCGAAAAAAAAAAAAAAAAA
TP463	A/G	2U	73.27	TGCAGAAACTCATTGGCCAGACAAGTACCAAATAGCTACACGAGCACTCACTGTCTGTCTTCTA
TP10614	G/T	2U	73.5	TGCAGCACTACAAAGCCAGGCCTTTATCATTTATACCGCTTCTTTTAGCTTGATGACAATGAAA
TP11542	G/T	2U	73.5	TGCAGCAGCCCTTTGGGGTCCATGATCCTGGCGAGGCAGAGCGTCTCCAGGGACGCCATGGACA
TP13016	C/T	2U	73.5	TGCAGCATCCCGCCTCCGTCCACGATCCTCCCGAGGCAGAGCGTCTCCAGCAACGCCATGTCGA
TP45669	C/T	2U	73.5	TGCAGTTTCAATCTCTACTGCGCCAACACATCTTTGTTTTTTCTAAAGGAGATCCCCGAAAAAA
TP14375	A/G	2U	74.68	TGCAGCCACTTCGGGTCCAGCGTCTCGGCCTCCTCCAGGTTCAGGATCTCGAAGACCGCCTGCA
TP30228	A/G	2U	75.68	TGCAGGATCCCAAGGGGCTGTGCGCCGAGAAAGGCGCGTCCGTGCCGAAAAAAAAAAAAAAAAA
TP4163	G/T	2U	76.04	TGCAGAGATCACAATTCACACCCTCCGCCCTTTTTGTTTATCCTGCTCGCCTGTTGGCATCCTT
TP9315	A/G	2U	76.04	TGCAGCAAGTTGTTGTCTCTACTGCACCCTTTGGATCACCGCCGCTACGACCCATGGCCACCAT
TP22284	A/G	2U	76.35	TGCAGCGTGAAGCTTGGAGCTAGAGAGCCATAGCCCACATAGATTTTGGCTGACGGTACAAGTG
TP21472	C/T	2U	76.47	TGCAGCGGGACGAGGACACCGCCGTCCGCCTCCTCCACCCCTTCACCGAAAAAAAAAAAAAAAA
TP39766	A/C	2U	76.47	TGCAGTATATATTCAACCCTGACCACCAACGACCTACCTAAACCCCCTAAAAAAAAAACGACCT
TP8388	C/T	2U	76.47	TGCAGCAACAACTAGTTGCACCCAATAGAAATTTACGTCAAATCAATAGTAGTGGGGCTCAAAA
TP26460	G/T	2U	78.1	TGCAGCTGTCCCAGGGGCTTCACGCCCGCGTCCCCCGCGGAGTGGGACCTGAGGGAGAACTCGG
TP18602	C/T	2U	78.43	TGCAGCGAAGGCGTCTTGGATGGTGGCCATGAGCGTGGGCGCGGTGGAGGCGCTCAAGGACCAG
TP17116	C/T	2U	78.89	TGCAGCCGCTCTCTCGCCCGATCTGATCGGATCACATATCTCTTTTTTTCTGAGGGAACAGATA
TP20997	C/G	2U	78.89	TGCAGCGGCAGCTCCTGGGGCAAGGAGGGCCGCTACTGGTGGAAGGAGAAGGACATGCAGGAGC
TP27519	C/T	2U	79.25	TGCAGCTTTACCTTATCTATTCACGGACGCGCCCACCCACTCGCTTTTTTCCTCACGAAACGCA
TP38249	C/T	2U	81.91	TGCAGGTTGGTCGTCCGTTTTGACCCAAACAGACACGCGTGAACAAGGCCGTCTCCAGAAATTC
TP8636	A/G	2U	81.92	TGCAGCAACGACCACGGCGGCTCCCTCCTGCCCGCTTATCTATTGCGGCTCCTGCCCGAGCACC
TP10318	C/T	2U	82.25	TGCAGCACGCACCCGAGGGTGCCGACGCCTTCCCCGTCGCGTAGGACATGCACGGCGCGACGGC
TP2545	A/G	2U	82.27	TGCAGACACAAACAAAATCACGTTTGCTCGTTGTCCGTCTGGACGCATATCCGAAAAAAAAAAA
TP37555	C/T	2U	82.27	TGCAGGTGGGCCTCATGGACGAGCAGGCCACGAAGGTGTGATGGTGGACTACGTTTGCCGAAAA
TP11101	A/G	2U	82.63	TGCAGCAGATGTACCTCCTAGACGAGGACTCATTCTCGGCGACGAACACCTCGGCGCGACAGAG
TP19169	C/T	2U	82.63	TGCAGCGAGTGCGGCTGCTACGACGCGTTCTGCGACTGCTGCTGCCCCTGCGTCTCCTACGACG
TP14531	C/G	2U	82.99	TGCAGCCAGCCACCCGCATCCTAACCAGCAGCCGCCGAAAAAAAAAAAAAAAAAAAAAAAAAAA
TP18171	C/T	2U	82.99	TGCAGCCTGGAGTTTCCCTTCGACATAAATGGGCGTAAACTCCTTCCACACCTTCGACTTGAAT
TP30418	C/T	2U	82.99	TGCAGGATGGACTTGCGAATCTGGCTAGCGCTAACAGCACGACTGGTCATGTGAGGTCGTACAG
TP30924	A/G	2U	82.99	TGCAGGCAGCCAACACCGATGGGCGCTTCCGATTCATCGATGAGCAAATAGCAGACCTGGTTGG
TP8687	A/G	2U	82.99	TGCAGCAACGGCAAGACAACACGTACTTACGGCGTCGTTCCAGACTCATATGCTACGTTCCACT
TP2381	G/T	2U	83.35	TGCAGAATTGATCACACTGGGTGTTCATTCGGCATGTAAGCGCCGTCCTGCTCCATAGGCCACA
TP3157	A/G	2U	83.35	TGCAGACGACGACGACTATATAGCCACCGATGCAGAGCCATTGACAAGACTTTAAGATCCAATC
TP44067	A/C	2U	83.35	TGCAGTTAGAGACACGTCCTCTCTATTTGCAAACAGGACCCTATGATAAAAATAAAACGGTTTT
TP17463	C/T	2U	83.71	TGCAGCCTACTGCAAATTACATGGGTGCACCCCTGTCTTATACTGAAATCACTTACTTGAGCAA
TP31787	A/G	2U	85.66	TGCAGGCCGTTTGATCGTGGCTGATCTGGCGATGGAGGAAGCGGCGGATAACCGAAAAAAAAAA
TP33780	A/G	2U	85.88	TGCAGGGAGTGTATACATTCGATGAGAAGGCAGGGGCAATCAAGGTGGAGACATTCTGTGTCCA
TP42612	A/T	2U	85.88	TGCAGTGCCAGGTGTTACCTGGTCGGGGAGAGTGGATCGCACACGCGGCATATCTTATCCAGTC
TP46044	G/A	2U	85.88	TGCAGTTTTATTTTGCGAAATTTTCTGATCGGGTTTCCGAGTCTCAGATTGACTCGTGGTTCCT
TP36190	A/G	2U	86.81	TGCAGGTAGTTGGTCACCTCGAAGCTGAACGTCCTGGTGACGTGCTCTTTGGCCCCATACCGAA
TP19699	A/G	2U	87.17	TGCAGCGCCACCCACTTCCAGAAGGACCTCTTCACTTTGCTCTGCCGAAAAAAAAAAAAAAAAA
TP4558	C/G	2U	87.53	TGCAGAGCGGCCGCGGGCTGCTGTCCTCCGACGAGGTGCTGCTGACGCACCCCAAGACGCGGCG
TP45923	C/T	2U	87.53	TGCAGTTTGGCCACCTGCGGGGGGAGCACACCGTAGATGTCGTTGTGGCTGACGTCCAACATGC
TP6082	A/G	2U	87.53	TGCAGATCATGAGCCAGGGTTCCTTTTTTGAACACAAGCTCATGAGTTAGGATCAGAGGATAAA
TP27197	A/C	2U	87.56	TGCAGCTTGCACTTCTCAACAATCACCAGATCTTCCCAGCCACTGAAAATCTCGATACCTACAT
TP34301	A/G	2U	87.89	TGCAGGGCGAGGAGGGAGCGCTCATCGTGGACGTGCCACTTGACATCCCCTCCCTTCTTCTGAA
TP10623	A/G	2U	88.56	TGCAGCACTACTGAGCCTATTGCCATTGCCAGCTCATCCAGAGGAAAAGGAAAGAAACGGCGGT
TP24045	A/G	2U	88.56	TGCAGCTCCAGCGAGGCACGACAACGACCTCTCTCCCCCTGACATTGGCCTCGCTCGCCGCAGC
TP32284	A/G	2U	88.56	TGCAGGCGCTGATCAGGGGCCACCTAGTGAGGAAGCAGGCCAGAGCCACGCTCCGCCGCATGCA
TP28218	C/G	2U	89.11	TGCAGGAAGCATCTCTGCTCCTTTGGATGCTGATGTAGGCACAACACTACGAACACTCAACATG
TP29611	A/G	2U	89.11	TGCAGGAGCTGGTCACGCGATTCCGCGAGACCCCCCCGAAAAAAAAAAAAAAAAAAAAAAAAAA
TP36971	C/T	2U	89.11	TGCAGGTGAAGAGCCTTCTCGGGAGGACGTATACCCACCGCCTCCTCAGCTTGGCGAACTTGTC
TP40115	C/T	2U	89.11	TGCAGTCAAGTTCCTCACGTAGGGACGTATGGCTCTTGCATGCATGCAGGGACGACCAGATCAT
TP44300	G/T	2U	89.24	TGCAGTTCAGCTCTTTGGGCAGTGAACCAAGAGAGCATGGTGGGCCTAACCGAAAAAAAAAAAA
TP24305	C/T	2U	89.47	TGCAGCTCCGTCGGCAACGACCACGGCCACTCACGGTGCCCGCGGCTACAGCCATCAGCCCAGT
TP25467	C/G	2U	89.47	TGCAGCTGCATGTGTTTTCCCTCTTTATTCCTTCTTTCGTCAGAATATGGCTTCTTCTCTTCAA
TP5701	C/G	2U	89.47	TGCAGATACCGAATTCGAAGGCTCACACGGCCACACATATGGCTTTGACAACAAACAAGACCAT
TP12709	A/G	2U	90.55	TGCAGCAGTGGGGTAACTGGCGGACAATTGGCGTATGCGCGTAAAAATGATACTCCTAGATCGC
TP716	C/T	2U	91.27	TGCAGAAATCTCCAGGCAAGGGGAGCTATCATCGGTGATTCCTATTCGGCGCTTCAGGCGCCCG
TP2396	C/T	2U	93.14	TGCAGAATTGTAGAGATGCGTAAGCTGTTGTGCACATGGAGCAACTTCAGTACACGTTCCCGAG
TP3142	A/G	2U	93.14	TGCAGACGAATCTAGCGAACCACGATCGAATAATCAGTGCAGTTCTTTTTTGTAGGTGATTAAT
TP19106	G/C	2U	93.5	TGCAGCGAGGAGTGCCGCCACGAGCAGATGCTGCTCGACGCCGTATGCGCCAAGCAGGCCGCGC
TP3599	C/G	2U	93.5	TGCAGACTCAGCATTGTCTATCCATCAGATCAGTGTGTGCTGGGAAATGAGCAGCATCACGGCA
TP37357	C/T	2U	93.5	TGCAGGTGCTGTCACTGGAGATTCACGGTCGCCACAGGAAAAAGTGTCGCTCTGACGAGGCAAA
TP33886	A/T	2U	93.61	TGCAGGGCAACCAATGAGCGACGCGTGTCCTGGTCCACTTCCTGGAAAACAAACATACCGTATC
TP17745	A/G	2U	93.86	TGCAGCCTCCGCGCGGCCTGCCTGGCGGAGACGGTGTCGAGGTGCATCTGCTCGCGCCGAAAAA
TP10751	A/C	2U	94.28	TGCAGCACTGTTGCTTGTCATGTCGGTGTCCCTAGCCGCACTAGAAGGTGTTCATGGCGTTTGC
TP10824	A/G	2U	94.28	TGCAGCAGAACCAAAGTAGACGCATGAATCCAACCAGCGAGCTCCCTTCCTCGCATGCATGGAC
TP13201	A/G	2U	94.28	TGCAGCATCTGTTTAAACAGAAATTTGCAGGGGGGTAGGATCCCGAAAAAAAAAAAAAAAAAAA
TP18089	C/G	2U	94.28	TGCAGCCTGCCACTTGTTGAGAGTGATCACTTTATTCCTCCTTGTTACCTTGCCTTGCCACATG
TP18638	C/T	2U	94.28	TGCAGCGAATTGTACTCGGAAGCCATGGACGAGCTCGATGCTGCGACTAAAGGCATCAAGGCGG
TP20436	C/T	2U	94.28	TGCAGCGCGTCATGATGGACAACTAATATACCATCTTGCCCTCCAACACGCAGTAATGCACAGT
TP21197	A/G	2U	94.28	TGCAGCGGCGCGAGGTGGGCACTCCACGCGGGGCAGAGGAGGACAGAACAACGTTGACCCGAAA
TP22783	A/G	2U	94.28	TGCAGCTAACTAGTAGTACTATAGTTACAAGCTTCTGCATACCTCATCGTCCGCTAAGATCGGC
TP23785	C/G	2U	94.28	TGCAGCTCAGCTCTGCTGCATCATCATGGGTGGCAGTATGGCACAGCTAAACAAATGCAGCATG
TP24843	C/T	2U	94.28	TGCAGCTCGTCCCGCCACGTCGGCTGTCCGCGGACTACTGCGTCCGCCACGCCAGCCGCCGAAA
TP25884	A/C	2U	94.28	TGCAGCTGCTGCTAGTGCCGCTGGCGCTGTCGGGGAACACGCTGTTCCCGACGCTGCTGGCCGT
TP28177	A/G	2U	94.28	TGCAGGAAGAGGACGAGGCGCCATGGACGTGAGGCGACGGGACGACGATGATGGATGCGACCCG
TP28303	G/T	2U	94.28	TGCAGGAAGGCCCTGTACTGGACCAGCCACCGCGGCCTGAACTGGATGTTGCTGACCAGGAACG
TP29288	A/G	2U	94.28	TGCAGGAGATGGGATTGGGAGGCAGGGTCGTGCGGGTGGCCGAAAAAAAAAAAAAAAAAAAAAA
TP36080	A/G	2U	94.28	TGCAGGTAGATCAGCTCGATGTCTAGTGGCTCCAGCTTGCAGCCGATGCCGAGCCGAAAAAAAA
TP36187	C/G	2U	94.28	TGCAGGTAGTTCATCTGGTTCGGAACGAAGCTGCTGCTTGAGTTCAGCACTGTGTTTGCTGAAG
TP40726	C/T	2U	94.28	TGCAGTCCATGGCCACGTTGACCAGTGACGCCGTCACCGCCGTTCCAGATTCATTGCCGAAAAA
TP42026	A/G	2U	94.28	TGCAGTGAAGTTTCTGTAGCAAAGAACCACCAGGGCAAGTGAGCCGACAGAGAAAAAGCACGAG
TP43065	A/C	2U	94.28	TGCAGTGGACTGAAAGCCATATATACATCGCACCTCCCTGATATGCACCGAAAAAAAAAAAAAA
TP44154	A/C	2U	94.28	TGCAGTTATGGCCTTTACACATTTTGCGTGCGTACATATCGCCGAAAAAAAAAAAAAAAAAAAA
TP44570	A/G	2U	94.28	TGCAGTTCCTGCTGCACTGGGTGGACGAGGCGGTGGATCCACTGCTGAAGGATGCCTTCAGCTC
TP4882	A/G	2U	94.28	TGCAGAGGCCGTTCCCCTTTCATTTCCTCCGCACCCACCTGCTCAGCGGCGATGGCTGCTCCCT
TP4996	A/G	2U	94.28	TGCAGAGGGAGGAGGCGGGCCACAAGGTACCTCACTTGTAAACCCTAGGTTACTTTTCTCGGCA
TP5752	A/G	2U	94.28	TGCAGATAGAGATAGGGTGACGACGCCCTCGCAAAGTCGCATGGAGATGGAGGCCTTACCCGCA
TP30506	A/G	2U	94.94	TGCAGGATTATCAAATAATCCAGAAGCGAATTTGTAAAATCACCAAAGAGATATGATTTCTCAT
TP31155	C/T	2U	94.94	TGCAGGCATTTGTTTTGGTCCACACGCATCACATCGAGCTATTATGGACCACCCAAGCCTACGT
TP10924	C/G	2U	96.81	TGCAGCAGACGGACGTCAAGATCGACTCGGCTAAGCGCCGCTCGCCCAGACCCACGGCGGCGTC
TP1113	G/T	2U	96.81	TGCAGAACCTTCCTCTCGTCCAGTCTCTTCTCAGCAAGGACCAGGAAGGAGATGACAAAGGCAA
TP11208	C/T	2U	96.81	TGCAGCAGCACCAAAACCAACACCAACATCTACAGCCACAACACCAACTTAACAGTCAAGGTTA
TP154	A/T	2U	96.81	TGCAGAAAACAGTTCAACTAGACCAGCTCCTTCCGCCGAAAAAAAAAAAAAAAAAAAAAAAAAA
TP16045	A/G	2U	96.81	TGCAGCCCGCGGACCAGCCGATGCTGTTCCCGCCTCCGCCACCGTCGGCGTCACCGAAAAAAAA
TP28258	C/G	2U	96.81	TGCAGGAAGCGGCCAGCACCAGCAGCACCAGCAGCCAAGACTTCACGAGGCCCATCGGGCTAGG
TP28339	C/G	2U	96.81	TGCAGGAAGTCCCACGACCTGGTGGTGTGGAGCTGGTACACGGGGTCGGCGAACACGGAGACCA
TP36069	C/T	2U	96.81	TGCAGGTAGACGAAGCGGTGGACGTGCGGATGGTGGGAAGTGACGCGGCCGCGGTGCGTGTGAC
TP36252	A/G	2U	96.81	TGCAGGTATGTCTTGTTCTATCTGCCTCGTAGCCTGGCATTCACTATTTCACTACACACTTGCT
TP36547	C/T	2U	96.81	TGCAGGTCCTCACCGAAGAAGTTTTCGTTGCCGTGCCGAACTGCAAGGTCGCGTGCCGCCCAAC
TP40200	A/C	2U	96.81	TGCAGTCACGCCCACAGCACATTCACTGTGGGGTATTATAAATATTAATTGGATTAAACAGAAT
TP38818	A/G	2U	97.17	TGCAGTACAACAACGGCAATGATCGCTGATGCTACAGCCAACAGATCTCCAGTAGCATCAATGG
TP41725	C/G	2U	97.17	TGCAGTCTGCAAAAATGCAGGCGGGAGCGGGATCGCACCTCGCATGCTGCAAGCATCAGATGGT
TP4370	A/G	2U	98.24	TGCAGAGCAGTGTACGTGCGCATGCATGCAGGACGAAATAGTACTACCGTCGCTTGGAGCACTG
TP10903	A/G	2U	98.46	TGCAGCAGACCACCTAACTACCTCGCCAGCTGCTGTCGTCCAACCGCGCCGATCGCCGCCGTCG
TP11440	C/T	2U	98.46	TGCAGCAGCATGCAGATACTTCAGAAACATAATGGGACGATAATCTTTGCGGACTACAGGTATT
TP11696	C/T	2U	98.46	TGCAGCAGCGAGAGCCGAGAGCGCCTTTACTTTTGCGCTTGAGTTATCAGTTTTCACGGGCCCC
TP14999	A/G	2U	98.46	TGCAGCCATGTGTGTGTATTCTGGGCTCTTTATGAGGTTCGCATGGATGGTACAGCCCCGAAAA
TP1825	A/G	2U	98.46	TGCAGAAGGGCATGTCCCCCTTGTACATGAAGATGTTGCTGTCCCGCGGCAGCGGCTTGGTGCA
TP36512	C/T	2U	98.46	TGCAGGTCCGACGACGGCGCTTGTGCTTCACAAATGGAGCTTCGGTGTCACCCTCCTTGTCGGA
TP41981	A/T	2U	98.46	TGCAGTGAACGACTGGAAAGCAGCGCAATAGTAAGCAGCAAGCCAGCAATTCGGCCGAAAAAAA
TP423	C/T	2U	98.46	TGCAGAAACCTCCACCTGTTACGAGATGAGCTCATAGCTGGAGTTGGCTGATTTGGATGCCATG
TP42583	A/T	2U	98.46	TGCAGTGCATTTTCTGTGAAGAAATGTTGCTTTAGGCCAAATTATTGTACACATTACAAATAGC
TP42674	C/T	2U	98.46	TGCAGTGCCGCGTGTTCGTTCGTCTTGCTGTGGTTGGTTTGGTTGGGTTGCCTTTTGATTCAGC
TP486	C/T	2U	98.46	TGCAGAAACTGAAAAGTTTCCTGTGATATTCATGGGCTCCAATCCGAACAGAGCCGAAATTCCC
TP26620	A/G	2U	98.58	TGCAGCTGTTTCACAACAATGAAGTTGTGTGATTTAAGAAATGGCAAAAGGACATGACTAAGTA
TP39549	A/G	2U	98.58	TGCAGTAGGGCGTGTCCCCTCTGTACATGAAGACGTCGCGGTCGCGCGCCAGCTGCTTGGCACA
TP40070	C/G	2U	98.58	TGCAGTCAAAGTTTGTTGTGGTCGGCAGTCGACCCCGAGTACTTCCAAAGAGATCGCCGTGCGT
TP7269	A/G	2U	98.58	TGCAGATGTCGAGGTACATCTGGATGACCTTGTCCTTCTCCGAGGCCCTGAGGGCATGGATGCG
TP25830	C/T	2U	99.25	TGCAGCTGCTCGTCGGTGGTGTACTTGCCGCTGTCTTTCGGGTCAGCGCAGTCCGAAAAAAAAA
TP10224	C/T	2U	101.78	TGCAGCACCTGGGATCCTGCATAGGCCTGCAACAACGGAGACGCAAAATTGACACGGCAGACAA
TP10233	C/T	2U	101.78	TGCAGCACCTGTGAGCTCGTACACGAACGCATCTACGTACGAGATTCACCGTGGTCACGAGGAA
TP10776	A/G	2U	101.78	TGCAGCACTTGCGTTAGCTTGCTGTTGCGGTATGGAACATGTGAACTCTTCTGGGCTAGTGCCG
TP10946	C/T	2U	101.78	TGCAGCAGAGAATTATCTAACCCACACCGCCAGCGATTGCGGCTTTCCGACAGTTTTTGTTTAT
TP11916	A/G	2U	101.78	TGCAGCAGCTCATGACGGCCGTCCAAGAGCTCCACATGCACCGAAAAAAAAAAAAAAAAAAAAA
TP12056	A/C	2U	101.78	TGCAGCAGGAAGCAGACGTCGAAGAACATCATGGGCTTGAAGTCGTCGTCGGCGAGACCCCGCA
TP12444	A/G	2U	101.78	TGCAGCAGGTCCTCGTACCTGAGGAAGAGCACCCTATCGGGCCGCGCGAGGCTCGCGCGCCAGT
TP12507	A/T	2U	101.78	TGCAGCAGTACACAAACAGCAAAGAAGAATCTGATGAGTCTGATCTCAAAAGCGTTTCACTAAA
TP12756	A/G	2U	101.78	TGCAGCAGTTGCTACCTTGAATCACTGTATTTAGGGCCATAATTTAAGGTTTGATTGAATCGTT
TP12935	A/G	2U	101.78	TGCAGCATCACCCGCTCTGCATAGGAATGGCGAACCCAATGGTGGCGACTCCAATCCGCCTCAA
TP1348	C/T	2U	101.78	TGCAGAAGAAAGGCTGGAGTTCCTTCTAAGTGTTGGTGTTAAAAGCAAGGATCTGAAGAGGATG
TP13514	A/G	2U	101.78	TGCAGCATGTGTGGCAACACGGCAGCATCGTAGGCGCGCTGAGCAACTTCAGGCTGCAAAAAAA
TP13642	A/T	2U	101.78	TGCAGCATTTAGCTTGCCAAACCGTAGTGCGCCTCATCATGCACGATAAAAAAATAGCGTCGAG
TP14588	A/C	2U	101.78	TGCAGCCAGCGGATGCGATCGCACGACCCGTTCACGACGATGCTTCTCCTTGCTCTCCGCATCA
TP15459	A/G	2U	101.78	TGCAGCCCCAAATGCAGCGGTACCAACAGAATATACCAGATGCAGGTCTCACATGTTTGATGGT
TP16174	C/T	2U	101.78	TGCAGCCCTAGGTGCAAACGCCTACCGTGCAACGTTCTTCTAAGAAGCTGATATTCAAATGCTT
TP16284	C/T	2U	101.78	TGCAGCCCTGCAAATCAAAGATCACGACCCGTTTTCATCATTCATGTGAGAAATGACCCAAGCA
TP17948	A/C	2U	101.78	TGCAGCCTCTGAACTTTCAGAACCAACACTGGAGAAAAAGATGCACTGTCAGGGTTATTAGTTT
TP193	C/T	2U	101.78	TGCAGAAAAGACAAGAAGCGGACCACGCTCAAGATACCGAAAAAAAAAAAAAAAAAAAAAAAAA
TP19588	C/T	2U	101.78	TGCAGCGCATCGGGGTCGGCCTCGGCACCGTCGCCTTCTCCATGGTCGCCGCCGCCACCGTCGA
TP19591	C/T	2U	101.78	TGCAGCGCATCTCGCGCCGACGGTGTCCCCCTTTCTTTTAGGTCCTCTTCGGAGTCCCTCCTGC
TP20612	C/G	2U	101.78	TGCAGCGCTGTATACGAGCTCCCATTTTCCACGGGCGACACATAGTCTCGGTGGTCGCACTGAG
TP21038	A/C	2U	101.78	TGCAGCGGCATTTTACCTTTTGGTTGCCTAATTTTACACCGTTTTTCTTTACATTTTCTCGTGT
TP22746	G/T	2U	101.78	TGCAGCTAAATTATGCAGTGAACGCTCTTCTATCCATCAATGTTGTGGTGGCTCTGGTTGTTGC
TP24665	C/T	2U	101.78	TGCAGCTCGCTAAAGCGTGTCCTTCCCGTTCCGATGCATATCCTGTCCCGATTTACCACTCATC
TP25680	C/G	2U	101.78	TGCAGCTGCGCGAGCACGGTGTTCAACACGATGGTGCAGGCGAAGATGGGCGTCACGGCGAGCA
TP26296	G/T	2U	101.78	TGCAGCTGGGGTCCATGGGAGGAGCTCGGGCTCCTCGGTGGCTGCCTGCTGCATGGATTGGTTG
TP2670	A/G	2U	101.78	TGCAGACAGGAGAAAGCAAAGCAAGGTGACCGACTCGGTGAAGGACGATGACATGAAGTGGAAG
TP27635	A/G	2U	101.78	TGCAGCTTTTCCTTTGCGGTGGAGGCGCGCCTGGCGATTTGCGAATAGACAATAAAAGAGAGAA
TP29141	A/C	2U	101.78	TGCAGGAGACCCGCCCGCACCCGAGTCTGAGCCGCCGAAAAAAAAAAAAAAAAAAAAAAAAAAA
TP29415	C/T	2U	101.78	TGCAGGAGCAGTTCTTCAAGCAAGCTTGCTTACAGTCTTCTCCGTTTGTTGCATTCACAACGAT
TP30501	A/T	2U	101.78	TGCAGGATTAGCAGCCTAGGTGTGATGGCTTTGGTGCATTGTATCTGTGATTCTGGGGACGTTG
TP3066	A/G	2U	101.78	TGCAGACCTCCGATGCCTTTCTCTTGGAACCAACTAACACCTTCTTCCCGCCGACTTCACGGCG
TP30785	A/G	2U	101.78	TGCAGGCACCCCTTCCCGCTTCCACGTGACACCGCGCACCAACGTGATCTCACCGCCTCATCAA
TP31474	C/T	2U	101.78	TGCAGGCCCTACAATCTGAACGGAGCCACGGAGGTTTCACAAAAGGCAGCCGCTGCTGCTAGCC
TP32428	C/G	2U	101.78	TGCAGGCGGCGAGGGACTCCCCCACGCTGGCGCTGCTGGACTGGTTGGACGGCTTCGAGGACGC
TP32824	A/C	2U	101.78	TGCAGGCTCCACATCGAGGAGACTTTGCAGGAGCGAGCGAGAGAGAGAGACAAACCAAATGGAT
TP33247	A/C	2U	101.78	TGCAGGCTTGAGGCAATCAGCACTGAAGAATCACTTCACATTCCTCCTCTTTCTGCTCCATGGG
TP33253	A/G	2U	101.78	TGCAGGCTTGCAGCAGCCGCGCGTGGCAGCATAGCATGGAACAATGCACAACAGCTCAGCGCCA
TP34269	C/T	2U	101.78	TGCAGGGCCTTGGAGCGTCACCGACGGCCTCATTCTCCATAAAGGACGGTTCTACGTCACCCCG
TP34643	C/T	2U	101.78	TGCAGGGGAAGTGCCTGACGGCAGATAACCTTGCTCGCAGGCAAATCCCCCATGATCCGATCTC
TP34928	A/C	2U	101.78	TGCAGGGGGACGGCCTGATCACCACAACCAACTAAGACAAGGCAAAGATGATTCAGGAGCACTT
TP36200	A/T	2U	101.78	TGCAGGTATATACAAGGAAAACGTTGTAGTTCCGTTCGAGAAGACCAACATTTTGCTAGTGGGT
TP37096	A/G	2U	101.78	TGCAGGTGATGAATGCAAGTGACGGATGCTAAACAAATCGTAATCCTCCATTGAACTGAAAAAA
TP37280	A/G	2U	101.78	TGCAGGTGCGTCCAGCCAACCCCTGATGAACAGAACAAGAAGAAGATGGGGATAGTGGCTGGGC
TP378	A/T	2U	101.78	TGCAGAAACAGCAGCACCTAGGAGCATTTCATCTGAATACTTGAAGGATCAAACCACTTACAAA
TP38010	A/C	2U	101.78	TGCAGGTTCGAGGTGCTCACCCTGGGAACCAACAACTTCTGGAGGCGAACCGTCGATCCCCCGT
TP38392	G/T	2U	101.78	TGCAGGTTTGCCCGAGTGTCGCTGAAATTGATGCGGAAGAGGAGCACGCAGCAGCGCGGGCGAC
TP38420	A/T	2U	101.78	TGCAGGTTTGTGCAGTTTGACGAATGCATTTTGGTTACAACTCATAAGAAGTGAGCCAAACAAT
TP38665	C/G	2U	101.78	TGCAGTAAGAACGGCAGCTGCATGGACATCCACGTCAACACCGTGGCGATCACGGCGGCGGACG
TP39644	A/C	2U	101.78	TGCAGTAGTGATTGTTCGTAGAGTAATTAGTACTAGGGCTTGCGCTTGATTTAAGTCGAGATGC
TP39664	A/G	2U	101.78	TGCAGTAGTGGATGATGACGGCACCAGCAGTGGAGATGGTGATGATTGCGGCACTGGTGATGAA
TP40014	C/G	2U	101.78	TGCAGTATTTCAAAGTGTATATCCATGCGCATCTACGGGAGTATCATTTTTGTGGATTGAACGC
TP40080	A/G	2U	101.78	TGCAGTCAACACCTACTACGCCGCTAACCTATCCAGCGCCTCCACCTCCTCCCTTCCGAAAAAA
TP40086	C/T	2U	101.78	TGCAGTCAACCAGGTTGCTGAACAAAATACTAGTACGAGATTACACTGAGCAGCACTGGTCTGA
TP40439	A/G	2U	101.78	TGCAGTCCAAAGGCGCCACTCGCTAACCACGACGCCACAGCGGAGCTCACATTTGAGTACAGGC
TP4150	A/G	2U	101.78	TGCAGAGATAGGATTTGCCATCGGACTTTGTTAGCAACCATGGAAATCTTCATATCATTTTTTT
TP41553	G/T	2U	101.78	TGCAGTCTATGTAGAATGCAGAACTTGTTTGGTGCAAATCCCGAAAAAAAAAAAAAAAAAAAAA
TP41667	C/T	2U	101.78	TGCAGTCTCGGGATAATTGGACAAATTCGCAGCAGCAGAAAAAAAATAACTACGGGCCAGATCT
TP42131	A/G	2U	101.78	TGCAGTGACTCTAGGCCCAAAACTGTACGAGACCGTGAGAGGCAAGCTGTCGCTGGGCGCGAGA
TP42507	C/T	2U	101.78	TGCAGTGCAGGGCCGCAATGTCACCAAACACTTTGTAGACATAGTTAGTCTCATTCATGCTTAT
TP43129	A/G	2U	101.78	TGCAGTGGATCAGGTCATTGACCACCACCCGATGCGGCGTCGGACCAGCGGATCCACGCTGCTC
TP4371	C/T	2U	101.78	TGCAGAGCAGTTCGCGGCCTCTTCCGAGGAAGAAAAACTCACACGGCGACACATGTGACAGGAG
TP4395	A/C	2U	101.78	TGCAGAGCATTCCAGAGTCAATGATCGCGCGGCTGCTGAACGTGGTGGTGCTGGACGTGCGCTC
TP43978	C/T	2U	101.78	TGCAGTTAAGTGTTTACTGTACGGGTACAGTAGCATGTACAATCGGCCATCAATTTTAATCCAA
TP43992	C/T	2U	101.78	TGCAGTTAATCTGTACCCCCTTCATAAAGAAAATATAAGAATTTTTGGATCACTATTTTAGTAT
TP45537	A/G	2U	101.78	TGCAGTTTAATCGCTTTACTATCTCACATTGCCCAAGGGCTTGTAATAATCTCGCAGACGCTCT
TP4584	C/T	2U	101.78	TGCAGAGCGTGCATGAGCTCGGTGGAAGGAACTTCTGGATCCACAGCACGGGGCCCATCGGCTG
TP46238	A/G	2U	101.78	TGCAGTTTTTTTTACTCGGTCAACAGAAAAAAAATCATTTGTAAAAAAAATCTGGGAAAAGAAT
TP4813	A/C	2U	101.78	TGCAGAGGATCTCTCGGCCCGATGTAAACACGGAGAGTATCATTCTGCGGACACGGCGTAATAG
TP4864	A/G	2U	101.78	TGCAGAGGCCATAGCAGTAAAATCATCTCTCTGGTGCAATGATTTTGGCACCCCATAAGCTCTC
TP4897	C/G	2U	101.78	TGCAGAGGCGCGCCAGCCACCGCAATGGCGCACGCACCCACCTTCGCTTCTCTCTTCTCCACTG
TP5139	A/T	2U	101.78	TGCAGAGGTTTCTCGCGAGCGCTGGCTGGCCGCTCGTGCTACTCACCACCTTTTCGCAGAGGGA
TP5147	A/C	2U	101.78	TGCAGAGTAAAAGCGTCTCCGTAGATCCAATGCACAATGCAATGCACCTAGACTACGCTTGCTA
TP5280	A/G	2U	101.78	TGCAGAGTCGGCCATATTGCTCTCATGGTACTGATAATGCGGGCGAAGGGCAGGGCGGTGGTGG
TP5484	C/T	2U	101.78	TGCAGAGTTGGGTACCCGTATCCCTAGTGCGTACTACGTGCGTGTCGTCTTCATAGCTCAGTGC
TP6018	A/C	2U	101.78	TGCAGATCAGAAGCTCGTCGTCTGGAAAGCAGAGAAGGTTCCGAAAAAAAAAAAAAAAAAAAAA
TP6088	C/T	2U	101.78	TGCAGATCATGGAGTGCCCAATGGATACTACAGCAAGCAACGCCGCGCTGGTTATAGAATTCCA
TP6510	C/T	2U	101.78	TGCAGATCGTGCACCCCAAGGCCACCAAACTCGCGCGGCCTGCAAACCTGCTTCCAGCTCACCA
TP6828	C/T	2U	101.78	TGCAGATGATCAAGCGGCGCCCGAGGCAGAATGCGCGGCCATGCCGAAAAAAAAAAAAAAAAAA
TP6875	A/G	2U	101.78	TGCAGATGCAAGCCAAGGATAGCCGAAAGTTCCACTTGCTCTTTTTAGGACAAGAGGGTTCCTT
TP6887	C/G	2U	101.78	TGCAGATGCAGAAACACATACGCGCGGTGTAAAATTTGCCGCATCCAGATCGAGAATCCGTCAC
TP7587	A/G	2U	101.78	TGCAGATTCGATACTTGGGAAGCGCACAACAACAGAGAAGGATGGTCAGGAGGCGGTGCCAGCA
TP7804	A/T	2U	101.78	TGCAGATTTCACCACGCGTGTCGCCGACGGACCAGCGAGGCGAAGCCCCCACCGCTCGTGCTCC
TP8739	C/G	2U	101.78	TGCAGCAACTATGTCTTCAAACTTCAATATGCCAGCAAGCCACTTTAGAGCCTTGCTACACTCA
TP9617	A/T	2U	101.78	TGCAGCACAAGCAAGCAGATTTCCATCACAAATTTTCACAATTCAAGCCTGTTGCAGTTCATGT
TP9787	C/T	2U	101.78	TGCAGCACATACTCCTGCTCCAACAACTGCCCACCTGGACCTTGCTGCAAGACGGGAATTTGAG
TP25266	C/G	2U	102.44	TGCAGCTGAGCACCAGCTCCTCTTCCTCCTCCCGTTTCCCTCCGCGTTTTCTCTCGCTGTCTCG
TP25336	A/C	2U	102.44	TGCAGCTGATGTATGTCCAGCTCCTGTCGTCTTGCGACCTCATACACGCAGCCGAAAAAAAAAA
TP10156	A/T	2U	102.78	TGCAGCACCGTCCGCCATGTAAGACCCGTCAACATTCAGCTTCACGTACCGTGGCGGTGGTTTG
TP10165	C/T	2U	102.78	TGCAGCACCGTCTGGCTGCACCCCTCGTCGCCGTTGCAGATCATCCACAGGCACGACACCGCCT
TP10617	A/G	2U	102.78	TGCAGCACTACCATCTACTGCATCATAGAGAATCATCTATACAAGAGCTCGTACACTACACATA
TP10692	A/C	2U	102.78	TGCAGCACTCGGATGGGACGAGAAGATGACGCCTCGATCTTCGCGCCGCCTTTTTCGCCACGTA
TP10904	G/T	2U	102.78	TGCAGCAGACCACGCCCCCCATCTCCAACGAATGGGGAAAAGACCCCCGACGTCAGGGTCCAAC
TP1100	C/T	2U	102.78	TGCAGAACCTCCTTTTGAATGACTCTAGTCTGTAGCTGCAATAGAAAGCGAGTCTTCTCCAAAG
TP11570	A/G	2U	102.78	TGCAGCAGCCGCCGCCGCTGCACCTGCTCCCCGCGGCCGCCACATGCTACGGGAAACCCATGGC
TP11673	C/T	2U	102.78	TGCAGCAGCGACAGCCGAGAGCGCCACCTTCCTCTCTCTTTACTTTTGCTGCGTCTTATCACTT
TP11989	A/G	2U	102.78	TGCAGCAGCTGCTCTCGTCTCCTCGGGGGCCATTGGTGGCCGCGGCGGCGTCCGAAAAAAAAAA
TP12420	G/T	2U	102.78	TGCAGCAGGTACCGAGCAGGTTGTTGATGTCCGACTGCCCCAGCTTAACGCTCTCCACGTGCAG
TP13015	A/G	2U	102.78	TGCAGCATCCCGAGTTGATTTATGCTTGCATTATAACATCATGAGTTTGTTGTTGTTTGTTTTA
TP13036	C/G	2U	102.78	TGCAGCATCCGTCGCTCCTCCTCCATCTCCTCCCGCATGCCCAGGCACTCGCGCCGCAGGAGCT
TP13053	C/G	2U	102.78	TGCAGCATCCTGCCGAGCTTCCTCACCGACCCGTTCCCCGCGGACCCCCTGGTGGAGGACTGCG
TP13496	C/T	2U	102.78	TGCAGCATGTGACCTTGTAACAGTCGCTCGCTAGCGAGTAGTACTGCTGACGTCAACGTACGTC
TP13599	A/T	2U	102.78	TGCAGCATTGCTCTCAAAGGCATCCCAATTTGGTTGTTCCATTGAAGCTTATGCATATAACAAG
TP13755	C/T	2U	102.78	TGCAGCCAACACGAACAGCGGGAGCCAGATGAACGGACACGGAGATGATGCCGAGTGGGCCCTA
TP13850	C/G	2U	102.78	TGCAGCCAAGCTGAAAACAAAATTGTACTAGAATGTTCCGAAGTGTGAAATCCGAATCCCGAAA
TP13928	A/G	2U	102.78	TGCAGCCACAACACCAGCGGGTCTCTCACGGGGTCCTTCTCTGACTGGACGAAGTAGTATAAAA
TP14277	C/T	2U	102.78	TGCAGCCACGGCCATTGCGCTTGATAGCAATGTTTAGCCAATTTTGGTTCGGAATACCCAATCC
TP14327	A/G	2U	102.78	TGCAGCCACTAGTAAGTGCCTGACCATTTCCTTTTTCTCTTCATCATCAAGTTTGTCCATGGAG
TP14839	A/G	2U	102.78	TGCAGCCATCCGCGGCGCAGTTCTACCAGGGCATCGTGGACTCGCCGTGGGTCGTCAAGCCCAT
TP15229	A/G	2U	102.78	TGCAGCCCACTGCACAGATCGGTACAACACCTATTAATCTTGTTTCAGACCTGATCGATGATGT
TP15452	A/G	2U	102.78	TGCAGCCCATTTAAGAACCACTACCGTTTCTATTTACATTACATTAAGGTTTAGGAGCCCCAAT
TP16003	A/G	2U	102.78	TGCAGCCCGCCAAGACTCACAAACCCGAATCTCAGGCCAACGAGGATTCCCTAAAGACGTACGC
TP16279	C/T	2U	102.78	TGCAGCCCTGATCACACCCTGCCTAATTAGCATGCGCATGCAAATGGCCTGCCGCTGACTATTC
TP16374	C/G	2U	102.78	TGCAGCCCTTTCTACACCGTGCCAGACAAGGATCTTGTCCACGTCTTATTTAATTTGTTGCCCT
TP17118	C/T	2U	102.78	TGCAGCCGCTCTTCGACGCGTTCTGCGACCACGCCGCGGCCCCGCTCGGGCGCCTCCTCGAGGA
TP17201	C/T	2U	102.78	TGCAGCCGTATTGAGTCCTATGCACTTTACACATTGCACGCCGAAAAAAAAAAAAAAAAAAAAA
TP17458	C/T	2U	102.78	TGCAGCCTACTAGTCGAGCAGCCATGAACGGTTCAAGTGCAAGTATCTGATCAACATGCGATCA
TP17485	C/T	2U	102.78	TGCAGCCTAGCGCGTACCCTCGTCACACACTATTTTCGTATGGTCCGAAAAAAAAAAAAAAAAA
TP18034	A/C	2U	102.78	TGCAGCCTGAGCAGCACGTCCAGCAGGTCCTCATCGTCGGTGCTGCATGCGCCATGACCGAAAA
TP18203	C/T	2U	102.78	TGCAGCCTGGGCGCGAGATGCACTTGTTGGATCACGAGGTGCTGGCCCTTGGTGGACGTCTGTG
TP18644	A/G	2U	102.78	TGCAGCGACAAAAATTTACATCAAACAACCAGGGGAAAAATGGATGATTGAAAAGACAAAAGTG
TP19201	A/G	2U	102.78	TGCAGCGATAGCGCCCATCGAGCAGGGGAACCTGGGACGGACGACAATACGAGGGAGAAGACAG
TP19536	A/C	2U	102.78	TGCAGCGCAGGAAAGGCACGACAAGCAAGCGGGCGACAGAGAGCGGGCGAGCAGCAGATAATAA
TP19787	C/G	2U	102.78	TGCAGCGCCCACGCCGACACCCACCCGCCGCCGCCGCCGACCTCCAAGCCCAAGGCGCCGCCGA
TP19797	C/T	2U	102.78	TGCAGCGCCCATGTATCTTGTAAAACAACTCAGGTCTTGTAAAACGCAGATTGACCGAAAAAAA
TP20220	C/G	2U	102.78	TGCAGCGCGCCGTGGAGCCTGGCGGAGCCGCGGAGGCTGTTGCACGCCAGCAGCCGCAGCTCGT
TP20264	C/T	2U	102.78	TGCAGCGCGCGTGCGGTGGCGATGGAAGTCCGAGGCACGAGCCGTGCTGAAGCGCAAGGTGTCG
TP20397	A/G	2U	102.78	TGCAGCGCGGGTACAAAGTGGGTGCCTGCCGCGACAAGTGCCTTGCCGCGGTCGTTGCCTTGTC
TP20838	C/T	2U	102.78	TGCAGCGGATCCGCGGAGATGGCACCAACATCGATGCCGAGTTCAAGGACATCGTCCGCGCCGT
TP2112	C/G	2U	102.78	TGCAGAATCCGCTAGGCGCAACTGCTTCCAAGCAAGCAGCTCGCCATGGCCATGCCCGCACGTC
TP21186	C/T	2U	102.78	TGCAGCGGCGCATTCGGGGAGAGTTGCGTCGACCCCATCTTCGTTATACACGGAAGCCGACCGA
TP2131	A/T	2U	102.78	TGCAGAATCGATCGCCGTGAGTTGACTTATATCTCGGCACCGCTGCATGGTTGGCTCCGTTTCA
TP21711	C/T	2U	102.78	TGCAGCGGTAAACGTCGCCATATCCTTCGACTCTCCCGAAAAAAAAAAAAAAAAAAAAAAAAAA
TP23700	C/T	2U	102.78	TGCAGCTCACCGCGCACACCACTGCGACCCACTACCACCGCGGTCCACCACCTATAGCCGAAAA
TP24513	A/G	2U	102.78	TGCAGCTCGACCTCGACGTGCCGTGACTGTGCGAATCTTTGCTTTGCCGAGATGACGACGGGCC
TP24775	C/T	2U	102.78	TGCAGCTCGGGGGACTTCATCGCGGCGCCGCCGTACTTGACCACCACCGTCTTGCCCTTGAAGC
TP2486	C/G	2U	102.78	TGCAGACAACGAATGGCAATGTGCTCCCTGGCACGGTCGTCGACACAGTCGTGGTCGACGGGTC
TP25205	C/T	2U	102.78	TGCAGCTGAAGCTCGCCACGCACGGCACTACGACCTACTGCCACAACGGTCCACCACCTACAGC
TP25409	A/G	2U	102.78	TGCAGCTGCACACCACCAGAAGCCCCGACTTCCTGGGCATTGGCCCGAAAAAAAAAAAAAAAAA
TP25705	C/G	2U	102.78	TGCAGCTGCGGCGAGAGCTTGAGAGCCGTCATGGAGGACTCGGCGTCCTGCCCGTAGATCTGGT
TP25761	C/G	2U	102.78	TGCAGCTGCTACCCTGACATGAACACGGCTAACTGCATCGGGCATTCAGCCTAGGCCTAGCTAT
TP25991	G/T	2U	102.78	TGCAGCTGGAACGACTGGGATCCTCCTCCGTGCTGTACCGTGCTTTCTGTTCGGACGGCAGAAC
TP26699	C/T	2U	102.78	TGCAGCTTAGGAATTCGTTCCGTATGAATTTGCCACACCATTTCCTGTGCCAAAACAGAGGAAG
TP26793	A/C	2U	102.78	TGCAGCTTCACTTTTTTGTCTGTTTAGTGAATAACGTGTGTACATTTGTTCACAATATCAGATG
TP27553	C/G	2U	102.78	TGCAGCTTTCCCCCTTCGTTTCATTTGTCCGAAAAATGCAAGCATCGGGAAAACATTCCCGAAT
TP27858	A/G	2U	102.78	TGCAGGAACAAGAGCACGCGGGGATCAGGATCACATATATTCTGTTCCACTGACCATTTGGCAA
TP2825	C/G	2U	102.78	TGCAGACCAGACACCTCCATCTCCTGGAACAACTCCACGGCCTCCCTATCAAGTCCTCTCCTAC
TP28629	C/T	2U	102.78	TGCAGGACATGGGGATGCGTGCTCCTTCCGAGTTAGTCAATCAGTGTACCATACAATTATTAAT
TP28890	A/G	2U	102.78	TGCAGGACGCTGGCGACGACAGCAGCATCAGAGGGGCTTCCCGAAAAAAAAAAAAAAAAAAAAA
TP29517	A/C	2U	102.78	TGCAGGAGCGGCAGGAGCGCCTGCCACAAGCGCGGCGAGGCGGCCACGACGAGCGCCAGGTCCC
TP29652	C/T	2U	102.78	TGCAGGAGGAAGGGGAACCCTACGAATCGTCCTCCTCCTCCGCCTTCTCCGCCGCCGCCGTGCC
TP29744	G/T	2U	102.78	TGCAGGAGGCAGTGAAGAACGGACACCTCTCAGTCAGGTAGCATGCAACACAGCTGCGCCCTCC
TP29939	A/T	2U	102.78	TGCAGGAGGTGGATCTCCAACAGGGTGTCAACGACGTGGTCTAATGGTCCTGGGAAAGATAGTG
TP30637	A/G	2U	102.78	TGCAGGCAAATGGCAGCAGCAAGGTGGCAAAGAAGATCAGCCCGAAGGACAAGTACTGGGTAGC
TP30638	A/G	2U	102.78	TGCAGGCAACAACGGCAGCAGTAAGTAAGTTGACAACCATGACCTGCCCAGTCCAACTAGCCCC
TP31897	C/T	2U	102.78	TGCAGGCCTGTATCTGCTGCGTCCTTCTTCTTTTCCAAGTAAAGTTTCTTGCCGCACCGAAAAA
TP32254	C/T	2U	102.78	TGCAGGCGCTCAGGGCCACCATCGACAGGTTCGGGTCCGAGAACGTGTGCCTCTGCGGCCACTC
TP32953	A/C	2U	102.78	TGCAGGCTCTGTATTAGTACCTTGTGTACCTGCTTGTGGAGTCCCATGCTGGATTTTAATGCTG
TP33189	A/G	2U	102.78	TGCAGGCTTATTTTTTACCGCAAGGCTGTTTGGCCATCAGGCGTCAGACAACAATGTTATCCGC
TP33463	C/T	2U	102.78	TGCAGGGAATATGGAAATAGGAAATTAGGGGAGCGGGCTGCCAAGTGCATCAATGATAGCAATC
TP33696	A/G	2U	102.78	TGCAGGGAGCTTGCACGCTTGACACTTCCGCGGTCGCACTAGTATTAGTGCCTGCGCAACGTGC
TP3430	C/T	2U	102.78	TGCAGACGGGGCCCAGAAGAAACGTAAAGAGCCCCACCGCAAAACTTACGTTACGCCCTCCCTC
TP34699	C/G	2U	102.78	TGCAGGGGAGGGCAGTGGAACTCAGGAGGGAGGTGCCACAGGGAGACCGAGCCCATATTCAACC
TP34703	C/T	2U	102.78	TGCAGGGGAGGGGGTGCTACGGCGCTTTGAGGTGCCCTATGCGCCATACAGGATCCGCCGAAAA
TP36119	G/T	2U	102.78	TGCAGGTAGGACCGACCAGAGAGGCTCTTTCCATCTGTGGCGATTCCCATCGGTCCACCTACCA
TP36487	A/T	2U	102.78	TGCAGGTCCATGCACGAGGAGGGTCGGACCATCTTTGTGCATGAAGCTGGGGCTGGGGCTGGGT
TP36793	A/G	2U	102.78	TGCAGGTCGGTACATGACTTCGTGTCCGTCAAGTGACCAAACGAACATCCACTGTTGATGTGGG
TP36831	A/C	2U	102.78	TGCAGGTCGTGCTCCTGCGCCTCGCCCACGGCGACGAGGACGCTCTCGCTGGTCGTCCTCGTCG
TP3684	C/T	2U	102.78	TGCAGACTGATTTATCCTGACCCCGTCTTGCTTTAAGCGGCGCCATGGAGGGGAAGAGGCCTGG
TP37010	G/T	2U	102.78	TGCAGGTGACCGCCGTAACCGATCCCACCTCACCGTTTACGCAGTCTCTAGCAGCGACGCTGCC
TP37056	C/T	2U	102.78	TGCAGGTGAGCTCCCGTGGATGGACGTGTACTTGGCCTCGTCGGAGGGGAGTTTTGCAGGGAGA
TP37101	C/T	2U	102.78	TGCAGGTGATGGCGGACGTGATCCACTGGTGCACCCACAAGGACGGCGGGGCGCGGCCGTCCAT
TP37258	A/T	2U	102.78	TGCAGGTGCGGATCCACTATTCCTTCGTTCACCATGGACCTGATCTCCTCCTCGCTCAAGGGCA
TP37678	A/G	2U	102.78	TGCAGGTGTCCCTTTTTCATTATTGCTTCAGTCCTGTCCCATCTGTCGTGCCCGCAGGTATCCA
TP37842	A/G	2U	102.78	TGCAGGTTACGCGGCCAACAGGTGCGCGACGCCGTCTGTATCCCCAACGCCGAAAAAAAAAAAA
TP3837	C/T	2U	102.78	TGCAGAGAACAGACGGCTACGTCTGAATGCGGAGTTGCAGACGACCAGACGCTGCATGCCAAAA
TP38532	A/G	2U	102.78	TGCAGTAAACACAAGAGTTATCAGGATGATATTTACAGAAAAGAGCCAAATCACAACTCGAAAG
TP39063	C/G	2U	102.78	TGCAGTACGGCTAATCTCTGTTCGGCGGCGCTAACGAGGTACACCCGAAAAAAAAAAAAAAAAA
TP39268	C/G	2U	102.78	TGCAGTAGACCAGTAGTAGAGGACGACTGATGCATTGGACAGAGCTGGATGCTAGTACTACGCT
TP40285	C/T	2U	102.78	TGCAGTCAGGGCCAAAACTTGGCCTTCTTTTTGTCTTTTTGTTTTGTCTTCGTGACCGAAAAAA
TP40763	C/T	2U	102.78	TGCAGTCCCACTGACGCGCAGACCTGCGAGACGGTCCGTGGCTCCAACCTGAGTCTGCTCCTCC
TP41130	C/T	2U	102.78	TGCAGTCGACGATTTGTTCTGTATAACAAATATGCTACTATCACACAATGTCAGTCCACCGCAG
TP41153	A/C	2U	102.78	TGCAGTCGAGCCTGCTCTACGCGGGCGGCGCCGTCCGCCGCCCCGCCGCCGACCACGTCGCTCC
TP41232	A/G	2U	102.78	TGCAGTCGCCGCGGCAGTCCTACCACCTCGAACTCGCCCGCGTCGACGCCGCGGACACGGAAAG
TP41433	C/T	2U	102.78	TGCAGTCGTCCGTGATCCGCGACCTCGTCCTCCTCTCCTGCGTCGGCCTCCGCCCCATCCTCGT
TP41485	T/C	2U	102.78	TGCAGTCGTTGGTGGATAAAATGGTAGATAGATTGCCGAAAAAAAAAAAAAAAAAAAAAAAAAA
TP41611	C/T	2U	102.78	TGCAGTCTCACGCCGAGCCAACCGCCGTCGAGCCGCTCTTGCAAGCCGCCTCCTACGAGCCACC
TP42049	C/T	2U	102.78	TGCAGTGACAAGAAACAATGTAATCAGCCGACCGCCTCAGCTTCTTTGTAATTGTAACAAAAAA
TP42081	A/T	2U	102.78	TGCAGTGACCATTAAGGGCAGCGAAGGGGTGGCAAATGGCCAGAATCAGCGCAATCTGAGGCGG
TP421	A/G	2U	102.78	TGCAGAAACCGCATGCTAGCTAGGGCTGTGAACAAGGTGTGCATACAACCGTCCAACGTTTCTT
TP42235	C/G	2U	102.78	TGCAGTGATATCAAACTACATGGATAGAAAGCCTCCTAGGTTAATGAGGACATCACTTTAGAAA
TP42358	C/G	2U	102.78	TGCAGTGCAAGCAACAGGTAGGACCATACCACATACTACTATCTCAGTGGAGATGCATGGGATA
TP42425	C/T	2U	102.78	TGCAGTGCACGACCCACATGTGCCCCGTGCGCGTCCACTGGCACGTCAAGCTCAACTACCACGA
TP42678	C/G	2U	102.78	TGCAGTGCCGTATCCCGTAGCGGCAGAACGCCAGAATCTAGTGGAATGTTCAGTGAACTGGGAT
TP42831	A/G	2U	102.78	TGCAGTGCGTGATTTGGAGTGGCCGACAGCTCAAGGAACTGATGCAACCTCTGAAATAGTACAT
TP42876	C/T	2U	102.78	TGCAGTGCTATTCCGAATCGGAAGCTTGATCATGGAAGGAGCCACTCCCGCTCCCGCTCCCTCG
TP43120	A/G	2U	102.78	TGCAGTGGAGTGGACAGCTAGACGCCCATGGCATCGCGCAGCGTGACGATCAATCGTGCTTGAC
TP43731	A/G	2U	102.78	TGCAGTGTGCGTCTGAACGGCGACATCGAAGAAAGTCTGAATGGCGACATCGAGATTAACTGGG
TP44260	C/T	2U	102.78	TGCAGTTCACTGTCACATTGTAAGCGTCGAGCCCTCTGATTGATTGCTTCCTGCCTATCTCTAC
TP44388	G/T	2U	102.78	TGCAGTTCATGCTACGTCTTTGGATCGACTGCGGCTAAATCAACCTGAACATTTTGCTCTTGTG
TP45163	C/T	2U	102.78	TGCAGTTGCGATCGCTTGGACCCGCTCGCCGAACTCCTGCTTCTCGTTCACGCCCTGCGCGCCG
TP45862	A/G	2U	102.78	TGCAGTTTGAGTTGAATTATTACTCGGTCGTTAGGATTCACTACCAAGTTGAATCTTCAGATCG
TP46046	C/G	2U	102.78	TGCAGTTTTCAAGTACGACCGTGCGGCGCACAACGTGATACAGGTGGACGACTTCGGGTTCGGC
TP4605	A/G	2U	102.78	TGCAGAGCTCACACCTTCTCTTTCTTCCCTTGGTTTAAGTAGCCGTGGCGGCCTGCTCCGAAAA
TP46209	G/T	2U	102.78	TGCAGTTTTTGGCTGTCGAGGTGGAGGACGTGTGGAGATGCAGCAAGGGAAGGTGGGCTGCCGA
TP4752	C/G	2U	102.78	TGCAGAGGAGAGTTCTTTCTTGGTACGTGAAGCTCATGCCATGTTGCTTGTTTCTCTTGTCTGG
TP4919	C/T	2U	102.78	TGCAGAGGCGGGAGACGTGTGGCACGTAAGTTACGTGCACATCACTGGATTATTGAACCAAAAC
TP5075	A/G	2U	102.78	TGCAGAGGTAGCCGATGTAATCCTCAGGGGTGATGTCGTAGACTAGGCCAGGGTCAGCGGCCTT
TP5193	A/G	2U	102.78	TGCAGAGTAGTCGTCTGTGTGTCTTCTTTTGGGACAAAATAACAAAAAAATAACCCTTGTTGCA
TP5409	C/T	2U	102.78	TGCAGAGTTAACTTGGAGGTTTCTATTCACAACACGCATTACCTCTGTCTAGACTGTCATGTAG
TP5817	C/T	2U	102.78	TGCAGATAGTGTTCGAGATGATATCGATCGGAACCCTTCTGGCCTTCTACCTGGTGGCCAACGC
TP606	A/C	2U	102.78	TGCAGAAAGGGCTCAAGGGTTGGATAGCGGCCATGGAAGCGGGGGCTTTTTTTTATCTCTGTTT
TP6900	G/T	2U	102.78	TGCAGATGCATAAGATGTACCATACTCACTTGATACTGAGGTTATCTAGAACAAAGTATGTATG
TP7632	A/G	2U	102.78	TGCAGATTCTGGATACTTTGCATGAACCCATTTCAGCAGGAAATCCCATACGAAGTCTTCCTCC
TP7638	C/G	2U	102.78	TGCAGATTCTTACTGCATGGATTTTGGTCCTTGATTTGGGTGACGGCGCCCTGCGCCCTCCAGT
TP7642	G/T	2U	102.78	TGCAGATTCTTGAGGCGCGGCGCGCTTGTGCGTGCGCGTTGGCCTTTCCAGGTGGTCTCGTGCT
TP8326	A/T	2U	102.78	TGCAGCAAATGACTTGTTATTCTGCAAAAGGCGTTTTCTAATGACTGATAATGCAGCATCAAGG
TP8899	A/T	2U	102.78	TGCAGCAAGCAAGCAAGCATCCGTCCGTTGGTCCCTCGCCGCAGAAAAGAAGGGAAAATGCACA
TP9779	A/G	2U	102.78	TGCAGCACAGTGCTCAAACAGCCAGACATATCACGGTTCAAATCGCTCGTTTGTGATCTCACAG
TP9924	A/G	2U	102.78	TGCAGCACCACGCGCCCTCATACGATGGCAAACAACATTGATGGAAATGAGGCTAGGACATGGC
TP5795	C/G	2U	103.12	TGCAGATAGGCTCCATGAAGAATCCCATCCTCTCGTTTGCAGTGGAAATGTCCAACAGCTCCTG
TP35357	A/G	2U	104	TGCAGGGTATCGACGCCTCGGGCACCAAGGGGGCGACGACAACGGGCCTAGAGACCGTGGTGGA
TP35720	C/T	2U	104	TGCAGGGTTGCGTCCACGTGTAATCTGCGGTGCTGGTGCTTTGCTCCGAAAAAAAAAAAAAAAA
TP37918	A/G	2U	104	TGCAGGTTCAGATTAGCGGTGCTTATGAAAAAAAAAATAGTACTAGTATCTCTTTGACCATTAC
TP40766	C/T	2U	104	TGCAGTCCCAGACGCTGAGCCGCCTTGGGCCAGAGGACTCGGCCCCGTGGCCTTCGCGGCGACC
TP44422	G/T	2U	104	TGCAGTTCCACAAATGTTAGCGAGTTTTATCCTTTTTAGTGTGTCCACCCAACTGCCTTTGAGC
TP6730	C/T	2U	104	TGCAGATGACACATCGGGCATCCAACTGAACCCCAACGCGCTGGACGTTACGGAGGAGTGGGTG
TP21351	A/C	2U	104.53	TGCAGCGGCGTTTTCCTTCGTCCGTGCACGCGTACGCGCGGTGCAGCGGTACGTCGTCCTCTGG
TP24710	A/G	2U	105.53	TGCAGCTCGGAGGAGGTGCTGGTGGTGAGCGCGTCGGCACCGAAAAAAAAAAAAAAAAAAAAAA
TP7709	C/T	2U	105.53	TGCAGATTGGAGTGCGGAGCTAACTGTCTTCTCTAATATTCACAGTGGAGTTGTTTTGACATCC
TP26411	A/G	2U	111.06	TGCAGCTGTAACGGCAGAGCGAAGCCAAGTAGGAGGAGTAGCGTCTGGCGGTTCGCAATGAAGT
TP14998	A/C	2U	120.45	TGCAGCCATGTGTACGAACGAACCTGAAGCGAGACGGCGGAGGCGACACCCAGCTGCACCCTCC
TP1654	G/T	2U	120.45	TGCAGAAGCGCGCATCCACCTACAGTCTTCTTCCACTACTACAGGACTACTCTACCTGGGCATC
TP2676	C/T	2U	120.45	TGCAGACAGGCCCTATTTATAGTTTTATACAGGACTCCACAGAGGCCAAGCTTGGTTCCACTTA
TP3319	G/T	2U	121.12	TGCAGACGCTATGCGCGATGAGCCAAGTGTCCCAGGACATCATCGTGGGGGACGGCGAGTTCGT
TP22314	C/G	2U	121.45	TGCAGCGTGAGGGGGACGGTTCGGGGCTGGAAACGGATCGCCACTGATTATTAGTCGACGTCAA
TP18184	A/G	2U	122.19	TGCAGCCTGGCGCTTGAGCACCACGCGCGGCAAACGGCACGGAGGCGGACACGGTCAACGAGGG
TP35369	A/C	2U	122.19	TGCAGGGTATGTATCAAACTTATGGGTGTGCCTTTTATTCATGTCGAACTACTTACTGTAAAAC
TP41336	G/T	2U	122.19	TGCAGTCGGCCAGATGCTCCATCTGGCTACAGGCGCAACGGGACATCACGTTGGATACCGAAAA
TP3870	A/G	2U	122.53	TGCAGAGAAGCCACACATTAGGCTAGAACAAGAAATGCGATGTTCACCTGACCAATCCGAAAAA
TP21486	G/T	2U	123.2	TGCAGCGGGAGCGAGGCGCGGAGGTAGGCGCGCATGACGGTGCTGACGACGAACGGGTCCGCGT
TP40205	A/G	2U	123.2	TGCAGTCACGGAGTGGACAGTGGAGTGATCCGACAAGCCAACTTCCCATAGATAAGTCTCGCCG
TP44258	A/G	2U	123.53	TGCAGTTCACTATGCAGCTAAGGAAGGAACAACGATGATAATGTACTAGTACTGAGAAGATGAA
TP27511	C/T	2U	123.87	TGCAGCTTTAATCTCGGCCATGCATTGAGATCTGGGAGTATTCCAGACCCGCAGTGCAGCGTTA
TP32353	A/T	2U	123.87	TGCAGGCGGAGCTGAGGCAGAGGAGCTGGAGCTCCTGGGAGCCGTAGGTGAAGGTCTTCATCTC
TP21011	C/T	2U	125.5	TGCAGCGGCAGGGGAAGACGGTGCGCGTGCTGGAGTTTCCGAAAAAAAAAAAAAAAAAAAAAAA
TP2684	A/G	2U	128.2	TGCAGACAGGGGAGGGCCACCCGCAGGCAAGCGTCTCAATGGCGAGCTCGCTTTGGGCATGCGC
TP18725	C/T	2U	129.01	TGCAGCGACCAGCGGATCTCGCTTGTGACCACGTCCACGTACGCACTAGTACGTGCGAATAATC
TP14020	G/T	2U	129.75	TGCAGCCACAGTCCATGTCGTTGGTGGATCTACAGCTCTGGATCTTCAGGCTGTTCCGAAAAAA
TP35444	A/G	2U	129.75	TGCAGGGTCGAGCCGTAGCGCGCTACATTATTGTTGCATATGAAGGGAGAATGAGGTAGCCCAG
TP38829	T/C	2U	129.75	TGCAGTACAAGCTAGTTCCTGATGAGTGATGATAGCCTTCAATCCTTCAATCTATACCTCCACC
TP44019	A/C	2U	129.75	TGCAGTTACATAAGCAAATTGGTTTGTTGGACCCCATATATCCGACATGCGTAAGTACTGTTCG
TP10840	C/T	2U	130.48	TGCAGCAGAAGAGCTGGGAACGATGCTGGGCGTCTCCGAAAAAAAAAAAAAAAAAAAAAAAAAA
TP32602	A/G	2U	130.48	TGCAGGCGTCCAACTTCACTAAATGGCGGATGCTCGTCCGCGTCCTTCTCGGCAAGTACGATTT
TP40174	G/T	2U	130.48	TGCAGTCACCACCGATTTTGCCTCACCACCAGAAGAAGGAAGGAGAGGAGTCAGATCTAGCTAG
TP11958	A/T	2U	131.16	TGCAGCAGCTGACCCGTGAGAGGGTTGAAGCAGACCCACGGGCAAACAGAGGAGGGAGCGACGC
TP23914	G/A	2U	131.16	TGCAGCTCCAAGTACTGGACGATGTCGTGGGGGTTGCGGTGGCGGAGCGGGTGGTCGAGGTCAC
TP27581	G/T	3U	0	TGCAGCTTTCTTTAGCTCACCTTGGTTTGGTGTGGATTAGGGTAGGAGTAGGACAGACTTTATC
TP2550	A/G	3U	2.33	TGCAGACACAAGCAAGAGACCACGCACGCGCACATTTGTTACCGTCGGCTAGCTAGAACAACGC
TP39569	A/G	3U	2.33	TGCAGTAGGTCGTGGTTCGAGAAGCCCTACTTTAGTGTGTCGTACGTGAACACCAACATCCTTT
TP20286	C/T	3U	5.4	TGCAGCGCGGACAGACGTATGAGGAACAACGGCGAGCCTGTAGTAGAGAGACGGCCAGGATATT
TP13664	C/T	3U	5.92	TGCAGCATTTTCGTACTCTGATTGTCTTGTCAAGCGAGCCAGAGTAAAGCCTTGTTGGCGAGAC
TP33656	A/G	3U	6.55	TGCAGGGAGATGAGCTGGGTGCGCGCCATGGCGTTCATCACCCTGAGCAGCTCCGACATCAACG
TP18477	C/G	3U	6.91	TGCAGCCTTTCACTGGATAGCGCTGTCGGGTACACGAAGATCGGGCGGCGTAGTTCGGTTCGGT
TP4597	C/T	3U	6.91	TGCAGAGCTAGCTCACTTCGGCTGATTTGGTGCACTTTGGCTGATAATGATGTGGCAAGAGAAG
TP35987	C/T	3U	8.74	TGCAGGTACGACGACGAATGGGCGGCGCCGTACAGCTGCTCCGCCCTCGTCGTCGCCATGCCCA
TP4445	A/G	3U	8.74	TGCAGAGCCCTAGCTGAACTCATACAGTGCATACTCGACACCTACCTCTGATCAGTTGCCGTCC
TP3446	C/T	3U	12.64	TGCAGACGGTGCTCCCGCTGGGCAGGGTGAAGAGGATCATGCGGGTCGACAGCGAGATAAAGAA
TP42981	A/C	3U	13.31	TGCAGTGCTTCCCCAGGCAATCTATAACCTTCTTCGTCATCTTTGGCGCTTTGATCTCCATTGC
TP31959	C/T	3U	14.08	TGCAGGCGACACCCGCATTGGAGTTGCCTTCTCTTCTCCCCGAAAAAAAAAAAAAAAAAAAAAA
TP30435	A/G	3U	16.54	TGCAGGATGGCCACCTTGGAGGTCGTCCACGAGTGGTAGTTGGGCTTCCACTCGCAATCGAGGC
TP9885	C/T	3U	16.82	TGCAGCACCAATCATGCTTAGTATTCTAAGGAGGGAAGACAATGACACATAGCGCACCCACTCA
TP28703	G/T	3U	18.35	TGCAGGACCCTGGAGGGGACGGCGAAGCGCGCGGAGAAGGAGCGCGAGAGGTTGTCGGGCTCCA
TP37309	C/G	3U	18.76	TGCAGGTGCTCGACATTGTGTTCCGTGACATCGTGCTCAACGAACGGGACGACATGGGGTAACA
TP21937	A/C	3U	19.83	TGCAGCGTACGTGCCGCGGACCCACCGCCAAGAGCGCACTGTGGGCTCACGCCCTAGCTCTTCC
TP44118	C/T	3U	19.83	TGCAGTTAGTTGCACTTTGCCAGAGTAGCAAGATTGGAAACATATTCTGCTCTGAATTATTAGG
TP19722	C/T	3U	20.27	TGCAGCGCCACGTAGGCGTCCTCGATGCGGCGGCTCGGGAACCGCCACGACGGACCCACCTCCA
TP40356	C/T	3U	20.9	TGCAGTCATCTCTTTCCTGGCTGTGCCGTTGCCAGACTGCCAGTATAACTTTGAAACACATAGT
TP11719	A/G	3U	21.64	TGCAGCAGCGATTCGGTGGCTCGTCTCGCGTGAAGCGAGAAATAGTATGGGCCGAAAAAAAAAA
TP19504	A/C	3U	21.64	TGCAGCGCAGAGAGATGCTATGCTATATGCTTATTGTCAAACGGGTGGTTCTTTCGCATCCAAC
TP243	A/G	3U	21.64	TGCAGAAAAGTGCGGAATGGAATCACTGAAATGAGCCCGACATGAAGGGCAAGACGTAGAACAA
TP26632	G/T	3U	21.64	TGCAGCTGTTTTTGTTGTTGTTGTTGCGAAAGACTGTTCTTTTTATCAAGTTTGGATTGCAAAC
TP43367	G/T	3U	21.64	TGCAGTGGGCGGCGCCGAGGGAGCCGCTCTGCCAGACGCAGGCGGACTGCGAGGACGGCGCCAA
TP3518	C/T	3U	23.81	TGCAGACGTTTCCCCTACCTTTTCCTTGACAAAATCTTCGATCGAATTTTCCTTTACACAATCT
TP1316	C/T	3U	24.17	TGCAGAACTTGATCTGCTTTTAAGATGTGAATCATGTTCTGAAATGTTGACAAAACCATTCCTT
TP4205	C/T	3U	24.17	TGCAGAGATGCGTCGGCTTCGCCACTTCGGATGTGGTGCGCGCCAAGGCGGAGCTGTGGAGGGA
TP11981	A/G	3U	24.53	TGCAGCAGCTGCGGCTGCACATATAATAGACCGATCAATGGACGGCCGTATCTTCTTGGCAGCA
TP1616	C/T	3U	24.53	TGCAGAAGCCACGGTCAGCTTCCATCCGACTCTCATCCTCGTCACCGCCAACAGCCTACGCTAA
TP22694	C/T	3U	24.53	TGCAGCGTTTTACAGGTTCAAAGCAATGCAATTTCTTCCCGTGCAACCGAAAAAAAAAAAAAAA
TP38860	G/T	3U	24.53	TGCAGTACACGTGACCAGGGGTCAGCTACAGTGTGGTTTGCGTGGGCTGACGAGCCAGAGGCAC
TP41056	A/C	3U	24.53	TGCAGTCCTGTGAACGCAGCGCGCGTGCCCGCAACCGCCTCTGCCCTTTCCGACCTCAGCGAGG
TP41688	C/T	3U	24.53	TGCAGTCTCTGGAGCTGTGGGACATGGTGGAGAACAGGAGCATGACCGTCGCAGCGCACGACGG
TP44537	C/G	3U	24.53	TGCAGTTCCTAGCTTTCTAGTCTGTTTCTTTTTTTGAGTCTGTTTCAGGCACAGAGGATGATAA
TP44670	A/G	3U	24.53	TGCAGTTCGGCACGGCGTTCAAACAGCTTGTCAATGCTCACCATGACTCAAAAACAACACTGGA
TP45779	A/G	3U	24.53	TGCAGTTTCTCCAGCTCCTCCTGTTTATCTCCACCCTGAGCTCATTAGGTAATTACATGTCAGG
TP18029	C/T	3U	24.88	TGCAGCCTGAGATATGTTCAATGCTGCAACAAAGGTTGTGGTGGGAAATGGCGAACGCTCCTAC
TP27066	C/T	3U	24.88	TGCAGCTTCTGCGTCGTCGCCTGCTCCGCCGAGAGATGATGGTGGTGGCCCACGACCGAAAAAA
TP33817	A/G	3U	24.88	TGCAGGGATCTTTTCACCTTTTGGATGCTGCATGATGCAAACAGGGACAAGATACCATGAGGAG
TP40396	A/G	3U	24.88	TGCAGTCATGGGAGGACAAGTTCAGGGCCACGGTGCAGCGGCTGCGCGACGCCGAGGTGCGGTG
TP44703	C/T	3U	24.88	TGCAGTTCGTCGGCGCGTTCCTGCTGCCGCTGCTTGCCGTGGCTTCGTCGCTTGATCCGTTCCA
TP14491	C/G	3U	25.96	TGCAGCCAGATCTTCCCGCACTTCCAGGCCAAGTCCAAGCTCCTCCACGCGCGGCTGGCCGATT
TP262	C/T	3U	25.96	TGCAGAAAATAGCTACAGAAAAAAGAAATGGTAATATTAAGCTGGTCAGACAAACAGGATTATC
TP14364	A/T	3U	27.42	TGCAGCCACTGTAGGAGCTAAGCTTTGCTTCTCACATCACGCACACAGCACCCAGAAGGAAACT
TP3282	C/T	3U	27.54	TGCAGACGCCTTGACGGGAGCATGGGGAGAGGGACTATGGAGAGTGCACGCGCAGGTTGACGAC
TP25195	C/G	3U	29.25	TGCAGCTGAACTCGACCTCGCGGCGGCTGCGCGAGGGCTCGTGCACCGCGAGGGCCGAAAAAAA
TP9588	C/T	3U	29.25	TGCAGCACAACACTCCATACAATCCATACTAGGCAACGCAGCTCCGACTCCGACGGTGTACTAC
TP37040	A/G	3U	29.97	TGCAGGTGAGATATGCTCCACAACTACCATTTGTTCTGAAGGGCCTTAACGTCACTTTTCCTGG
TP39240	C/G	3U	29.97	TGCAGTAGAAAGAGATTGCATTGCAGTGTGGTCAATTTGTTTTTACCCAGTGCATTGACAGGCG
TP40173	C/T	3U	29.97	TGCAGTCACCACCCGCCAGTGGTCGCCGCTTGGGTCGCATCCTCGCCCCATTGGGCTACTCCAT
TP2971	C/T	3U	30.36	TGCAGACCCTTAAAGTACCAGAGTATAGCTATGTTCACAGCCTCACAGTCACACGTATTCATCG
TP3930	C/G	3U	30.36	TGCAGAGACAGACAGCACACCCAGGAGCAGCCAGCGGACGGAAGCCAGCCACAAACAGGGGAGG
TP42170	A/G	3U	30.36	TGCAGTGAGCCGTGTAGTGCGCGTGCATGCGTGCGCACCGAGCATGCGAGCCGCGGAGTGCGGG
TP23467	A/T	3U	30.7	TGCAGCTATATATATGCCACCACCTGCTTGAACTGTTGTTGCACCCAACGAGAAGTTCAGACTT
TP3212	C/T	3U	31.05	TGCAGACGATGAGGCGACACCTTGGGCTTGGACCGTGGGGAAGAACCATGTGGTAGAAGGAAGC
TP12309	A/G	3U	31.1	TGCAGCAGGGCACAAACGGTATTCAAACTCAGGATCCTCACAAGCATTCAAAGCTTTGAACATA
TP38463	G/T	3U	31.1	TGCAGGTTTTTTTTTCATTTTCTTCTGCGGTTTTGTGCTTCCAGTTTTTCACTGTTTTATCCAG
TP8648	C/T	3U	31.41	TGCAGCAACGAGCTCAATGCCTCAATGTGCATCCTGAGAAACAAGAACATCACATGGCCGCATA
TP19145	C/T	3U	31.84	TGCAGCGAGGTGCTCCGTTGTTGGTCCTCCATGACATGGCTTATAAAACCCACTGCATATGTAA
TP29548	C/T	3U	31.84	TGCAGGAGCTACGTGACCATGGTAAGCGGGACGCCGTGTGGAAGCTGCGCCGCAAGGATGACGA
TP29559	C/T	3U	31.84	TGCAGGAGCTCAGCAAGGTGGAAGAAGTAGAAAAAGGTATTACATGGTGGCTGACATGTCACCA
TP41284	C/T	3U	31.84	TGCAGTCGCTGCCGCCTCCTCGTCCTCCTCCCCCTGCCGTCTCCTCTTCCACTTCTCCTCCTTG
TP6343	A/T	3U	31.84	TGCAGATCCTGGGTTCGATACTTGGCTGCGCGCATATTTTTAGCAGCACAGGTCCGCTGACGGT
TP15895	A/C	3U	33.07	TGCAGCCCCTGTTCAAGAATTCGTCTGATTAACCAGTTAACTTACCGAAAAAAAAAAAAAAAAA
TP31718	C/T	3U	33.07	TGCAGGCCGTAAAATGCTGCCCATCGCATTGGACTGCTTCGCCTTTCTCCCCCTTATATATAGG
TP5504	C/G	3U	33.07	TGCAGAGTTTCGTCGGCACCTGGCAGGATCCAACGCCAGCGACAAGACAACGCCGTGTGGGACG
TP37004	C/T	3U	33.15	TGCAGGTGACATCCAGCTCCTTCACATTAGCATCCCCTTCCAGCCTAGCATCCAGCAGGCACAG
TP38077	A/T	3U	33.15	TGCAGGTTCTCCTTGTGCTGCTGGAACGTCCCGTCGGGGAACTTGAGCCGAAAAAAAAAAAAAA
TP9980	C/T	3U	33.15	TGCAGCACCATTTTTGCCTATAACTGGACAGCACGGGACACCACCTTCGGTGTTCCATGCCAAT
TP10853	G/T	3U	33.43	TGCAGCAGAAGCAGAAATTAGAAGCTTAGAAATGAATAGGACTGGGCAAACAGAAGAATCATGT
TP1749	C/G	3U	33.43	TGCAGAAGGAGAAACAAGGGAGAGAGGGGGCAGCGGAAATGCTAGGGCTGGAGCTCAGGTGCGC
TP18061	A/G	3U	33.43	TGCAGCCTGCAAACAGACCGATCGTATGTACGTAGATGTTCGCGACCAGAATGACAACGCTACA
TP20534	C/T	3U	33.43	TGCAGCGCTCGAGCGCGCGCCGCCCGTCTTCGTCGTTCAGCGTCGCTGCCTTCTCCTTCGACGA
TP22528	C/T	3U	33.43	TGCAGCGTGTAGGCTGTAGCAAGCAGCCCACCAAGACAAACATGCATGTACGTGAAGAAAAAAT
TP2295	A/T	3U	33.43	TGCAGAATGTCCACAACAACACAAGCAGAGCCACACGGCCAAAACAATAGATTCCATGACGGCA
TP25283	A/C	3U	33.43	TGCAGCTGAGGACCCGTAGCACCGCAGGGAGAAGAACGACGACCCACGGCCACGCCGAAAAAAA
TP26738	A/T	3U	33.43	TGCAGCTTATTTCCACGGAGCAGCTCAAACCGAGCTCCTAAAGCTCCGTGGAGTGGAACGGAGA
TP29954	C/T	3U	33.43	TGCAGGAGGTTGACGCTGCCATTGCCAAGCTGGAGGGTGAGACCGAAAAAAAAAAAAAAAAAAA
TP33324	C/T	3U	33.43	TGCAGGGAAAATGAACAGCTATCTAAGTACGGGGATACAAAATCTGCTCGCAGTATTATGCTGA
TP35334	A/G	3U	33.43	TGCAGGGTAGGAAGGCGACGACGTGCGCATCCATGGCCGAAAAAAAAAAAAAAAAAAAAAAAAA
TP36639	G/T	3U	33.43	TGCAGGTCGACGGGGTGGACGTCGGAGGGCTGGGCGGCGCTGTAGGCCCGCCTCCCGACGAGGA
TP38090	C/T	3U	33.43	TGCAGGTTCTGATCCTCACCGTGAACAGGCTCAACGGCACAATCCCGAAAAAAAAAAAAAAAAA
TP38674	C/T	3U	33.43	TGCAGTAAGATATCTGACACCACCGCGCCACTGCCCGAAAAAAAAAAAAAAAAAAAAAAAAAAA
TP40130	C/T	3U	33.43	TGCAGTCAATTTGCCTTCTTATTTATTTATAATCCCTATGAAAGTTACATTGTAAGTTTTATTT
TP41729	C/T	3U	33.43	TGCAGTCTGCACGCCAGTGGGGTGGTGGCATCCCTGCCCTGGCCCTGGCCACGGCCTGTATTAG
TP42069	C/T	3U	33.43	TGCAGTGACCAACTGGTCCACGTATCGTTTATTTTTTAGCTCAAAAAAGCAGTGAGCAGCGACT
TP42210	C/T	3U	33.43	TGCAGTGAGTAAGCCTACACGCGATACCATGCTGGCACCGAAAAAAAAAAAAAAAAAAAAAAAA
TP45906	C/T	3U	33.43	TGCAGTTTGCTTCCTCACTCTGTTAGAATAATCCAAGGCACTCCGTCGAACCATCAAGGATCAA
TP46166	C/T	3U	33.43	TGCAGTTTTTAAGCATGTCAACCAAACTGGAAACTGTACGTCAGGTCATACTGTCGTAGCACAA
TP5923	C/G	3U	33.43	TGCAGATATTTTCCAGCAGTTTTGCAGGCTCGATACGCTGATAACTCGCAGACGCGACTCGTCG
TP6416	G/T	3U	33.43	TGCAGATCGCCCTTTTTTCAACCCAGAAAACCACAAGCAGTCGGTTTCACCGCGCCTCGACGCC
TP9148	A/G	3U	33.43	TGCAGCAAGGCAGAGGTAGTAATCTCAAAAAAATTATGAAATACATTAGTGTGAAGACGTGAAC
TP9358	C/T	3U	33.43	TGCAGCAATCACTGCGCTTGTTGATCATTGGAGGACGGAGACACACAGTTTCCATCTTCGGACC
TP10678	A/T	3U	33.49	TGCAGCACTCGAGCTACATCGACTCTGCATCGCCAGGCGAGCCATCGCCGAGAAAATAAGAGCA
TP17673	A/G	3U	33.49	TGCAGCCTCCATAATAATCGGGGGTCAGGGCGGAGAGCGGAGTGGTTGGCGAAGGACTGCGCCT
TP18036	C/T	3U	33.49	TGCAGCCTGAGCCGCACTAGACGACAACGCCCCAACTGCGAGATGCCGACTGCTGCATCCCCGC
TP18495	C/T	3U	33.49	TGCAGCCTTTGCTGACATTCCAATCGACTCCAAGCAACCACGACGAATTTGTCCATCTTGTCTT
TP19568	G/T	3U	33.49	TGCAGCGCATAGTCCCTCTCATTCTTGAAGACCAGTGTACAGTACATACAGTAGACTAAAACGC
TP20503	A/C	3U	33.49	TGCAGCGCTACAGCAACCGTCCACTACAGATCAAGCGCGCCCCGAAAAAAAAAAAAAAAAAAAA
TP25084	G/T	3U	33.49	TGCAGCTCTGGAGCAGGAGAGGAGGCAGCAGAGCGGCGCCGAAAAAAAAAAAAAAAAAAAAAAA
TP26172	C/T	3U	33.49	TGCAGCTGGGACTACATCCAGGAGGGCAGCCAGGTGGCCAAGGACATGGACCGAAAAAAAAAAA
TP31364	C/T	3U	33.49	TGCAGGCCATGTCATTAATATGTTTGATCTTCATTCGCTATTGTAGGTGTAGCGGCCGAAAAAA
TP31649	A/C	3U	33.49	TGCAGGCCGCGCCCTCGGAGGCGTACTTGTAGTTGTCGCCCTAGGCGTACGCGAGGAGCTGGAT
TP32459	A/G	3U	33.49	TGCAGGCGGCGGGGCTGCCGTCCTTGGGTGATTGTGCGGCCGTCACATACTGCCACCGAAAAAA
TP3278	G/T	3U	33.49	TGCAGACGCCGTCAAGGAAGGTGGGTCTTCCGACGTGGCATTTTACGCCTTCTTGAAGCATGTG
TP33104	A/G	3U	33.49	TGCAGGCTGGGTCATTAGTTGTGGCCACTGGAGCTAATCCTTGAGCATGACTATGGGTCATGGA
TP36796	C/T	3U	33.49	TGCAGGTCGGTCGCATGGTGTAAATTCCACAGTACAGACTTAACACTGTACAGCAGCAACCGTC
TP36996	A/G	3U	33.49	TGCAGGTGAATCGTAACTAGTGTTGCCAGAAGATGTAAAATGAGCATTTCTCTTTTACCGAAAA
TP38742	C/T	3U	33.49	TGCAGTAATCGGGAAAATTCCCGTGTTCCTAGCAGGGCCTAAGTATGAAAGACAAACTATCTAC
TP42116	A/G	3U	33.49	TGCAGTGACGTAACGGATGAGTTCTTTTCGAAAAGATCCACATCCAGGATTCAGCAAAAGTAGA
TP5864	A/G	3U	33.49	TGCAGATATGCCTGCCGCTGTACGTGCTCGGAGGAGCCCTGACCGCGGCCGTCCACGTGATCAA
TP6027	A/G	3U	33.49	TGCAGATCAGATTTTTGCCCTGCAATCCATCATGGCCGCATCACCATGGACTTATCGGTATGAT
TP6966	C/G	3U	33.49	TGCAGATGCGCTTCGGCCTGGCTCATCATGTTGCTTTGTCTCAACTTGCTCGCTACGAGATCAC
TP7494	C/T	3U	33.49	TGCAGATTCAGAGTACAGTCAAAAAAGAACCTTGAATTCGTACGTCGCGTCGAAAAAGACGATC
TP7597	C/T	3U	33.49	TGCAGATTCGGTGAAGACTTGGTGGAACCTAATTGCTTCTAACATTTTGCAATCTACACGGGCG
TP10032	T/C	3U	33.79	TGCAGCACCCGCACGGCCGCCGCCTCGCCGAGTCCCGCGAGCCGAAAAAAAAAAAAAAAAAAAA
TP10313	A/G	3U	33.79	TGCAGCACGCAAGCAGATCAACACAAGTTAGAACAGCAATGGCTCAAGAAGCAAATTAGAACAA
TP11273	C/T	3U	33.79	TGCAGCAGCAGCACGACCGCGTAGAAATTTCCGTTTCCGTGCCCAGCCAAGACTTCCAAAATCC
TP14039	A/G	3U	33.79	TGCAGCCACATCAATAACAATATGTTTGCTTATTTACTTGGAACGCTCCGACTAGGCACCACGT
TP14884	C/T	3U	33.79	TGCAGCCATCTCTTTCGCCATGGCCGCCCTCTCTCGAAGCTTTTGCCCTTCCTCGGACTCCATC
TP1505	C/G	3U	33.79	TGCAGAAGATCATCGATCGACGTCGCCGAGCAGTGCACGACTGTGATCACGCGAAAGGGAGGGC
TP16041	C/T	3U	33.79	TGCAGCCCGCGCGGCGAGCACAAGCTAGCGCATGCCCGTAGTTATTGCGACCCGAAAAAAAAAA
TP18656	C/T	3U	33.79	TGCAGCGACAACTCATGTCGTGCATCCCCCGTAGCTCGAGTTCAAGCACAGAACTTACACCAAA
TP20501	A/G	3U	33.79	TGCAGCGCTAAATAGGAATTGCTAGAGCCAGCGTCTATTTGCTGGGAAGATTTGGGCCGAAAAA
TP21958	C/T	3U	33.79	TGCAGCGTAGCTGTGGAAGCCGAGACGGTACCTGACGTGCCGAGGAGAGTTAAATATTTTCACT
TP25240	C/G	3U	33.79	TGCAGCTGACGCAGTGGGAGAGCAACCACGGCAACATCATCAAGGGGGAAGGGTACCTCGACTT
TP25837	A/G	3U	33.79	TGCAGCTGCTCGTTGCTGCTTGCTTGCCCGCCAAAACCAGCACCGACATGCCAAGAAATGTTGC
TP26683	A/G	3U	33.79	TGCAGCTTACTCAAATTTAAAAGTGGCAGGAGTATAAGATTTCTCAAGAGGCCCTTGAAAACTT
TP27209	A/G	3U	33.79	TGCAGCTTGCATGCATGCGGTAATGTAGGTGTGCACAGTTTGGAGAATAGAAATTGATTGACCC
TP28753	A/G	3U	33.79	TGCAGGACCTCGGCCTGCGCCTGCCGTTCGCGCCCCTCGCCACCGACTTCTCGGAGATGCTGGA
TP29569	A/C	3U	33.79	TGCAGGAGCTCGTCCACTCCATTTCCTATGCGTATGTGCACTGAAGTAGTTGCAAAAGATTCAG
TP30234	T/C	3U	33.79	TGCAGGATCCGAATCCGATGCATATGCGCGCATGTGATCCATCTCATCTCATCTCTTTTCGTGA
TP3027	G/T	3U	33.79	TGCAGACCGTCCAGACCGCACGGGCGGACGCCGACGCACTCGCGTGGACGCCGAAAAAAAAAAA
TP32109	A/G	3U	33.79	TGCAGGCGCAGCCAGCGCGCGCCTTCCCGCCCCACCGCCGCCTCCTTCTCCGCTCCAGCAAGCT
TP32186	C/G	3U	33.79	TGCAGGCGCCGCCGACGGTAGTGGGCGGCAGCGGGGCGCGCAGGAGCAGCCGCGGGCAGGCGGC
TP33641	C/T	3U	33.79	TGCAGGGAGAGCACCGATACGACCACAATCTCTTGGACGGAAGGAGCCGAGGCAGTGAGCGAGC
TP35011	C/T	3U	33.79	TGCAGGGGGGCAGAGAAACTGGAGTACTTTGGGCGCAGGGAGCACGGGACCGCACCCGAGATTC
TP41754	A/G	3U	33.79	TGCAGTCTGGCAGTCGTTGGCACGCTATTGATTCCAAGCGTGTCCATTTCCGCAAGTACCGTGG
TP43780	C/T	3U	33.79	TGCAGTGTGTCTTGGGACAAAGTCTCGGAGAAAAAAAATTGTCACGCAATAACTAAAGGGCGAC
TP46199	A/G	3U	33.79	TGCAGTTTTTGCATAGCGGCGGGACCTCTCTAGTGCTTCCGCGGCCTTGGTCTTTGCTCCCTGG
TP4857	C/T	3U	33.79	TGCAGAGGCCAACGTTGTGTTCTCGTCTCTTATGGGTGCTCGGGTAAGCAACCGAAAAAAAAAA
TP9250	A/T	3U	33.79	TGCAGCAAGTAATTTCCATGCACTCTAATGTCACATGTTTACGCTAAAAATTTGACGTCAAATG
TP10492	A/G	3U	33.85	TGCAGCACGGCTGACGCGGCGTCGCTCCTGGCTGGTTCATGCACTAAGCCTGGCTCCCGCCGTT
TP13744	C/T	3U	33.85	TGCAGCCAAATGGAAAAGCACTTTTCCTGATCCACGGATCAGAACGGCAATGGATTTCCCGAGC
TP24834	G/T	3U	33.85	TGCAGCTCGTATCAAGTCCCGACGAGAATTGAGATGGAAGAGATTAGTGTTTCGTTCGAGGACC
TP252	A/G	3U	33.85	TGCAGAAAAGTTGATGGTGAGGCAAATGAACTAAAATCCAAAGAACAGGACGCGGATCTAAACA
TP26847	C/T	3U	33.85	TGCAGCTTCCACAATACTGGCCATCTCTCCCAGAACCGCATTAGGGCATCTTCAGCCGTTGGCC
TP28694	A/C	3U	33.85	TGCAGGACCCGAGCACCTCCGCCCGAGGCGGCCAAACGGATGGCTACGGCCATGTACAAGGCAG
TP29801	A/G	3U	33.85	TGCAGGAGGCTCGTGAGGCACAAGAGCACGACAAGGTATGGCGTGGAAGAAGCCATCTTGATTA
TP30226	C/G	3U	33.85	TGCAGGATCCATGTTTGGCATGTCAGAGCCGATTCCTGATGTATTCCCTGTGGAGTCGCGGGAT
TP30247	A/C	3U	33.85	TGCAGGATCGAAAGGTAAGTATTAGATCGACGTATATATAGAAAAACAAGCAGTGCCTTCTTGC
TP32255	C/T	3U	33.85	TGCAGGCGCTCATTAATGTGTATTTTGTAAACGGGCGCCTGGAGCGCTCTGCGTCGGGCCGAAA
TP33692	A/C	3U	33.85	TGCAGGGAGCTCGCGAGGAGATGGAGGACGAGGTCGTCCTCTGCCCCGACTCCCTCCTCAACGG
TP38284	A/G	3U	33.85	TGCAGGTTGTGATGCAGCGGATGACTTGTGTTATCATTATCAAGTAAGGGATCGTCATAAGGGG
TP39723	A/T	3U	33.85	TGCAGTATAAGGTGATAGAAGGCAGATGTGAGTTCTGATTAAGAAGAGACCAAGAATACCTATA
TP43101	G/T	3U	33.85	TGCAGTGGAGGAGTTGAAGTGGTGGTCGGCGGACACGGCGATCTGGACTGGGGAGCGGGGATGG
TP43927	A/G	3U	33.85	TGCAGTTAAATTTGTATGAGTGTCTGACAAGAACCAAGACTTACCGCCGCACCAGCTGTGTCGT
TP5993	G/T	3U	33.85	TGCAGATCACACTGATCCCTGGGGGCTGATGGGGGTACGATGCGTGAAGCAACACGAGCAATAC
TP731	A/G	3U	33.85	TGCAGAAATGAGGATGAGCCAATCGTCTTTATCAAGAAGTTTACCACCTCCCCTACCCTGCACC
TP19836	C/G	3U	34.21	TGCAGCGCCCGTGTCTGGGGCTTCGCGAAAGACAGAAGGCTCGGGCGAGGGACGACGGGGCGGG
TP2500	C/T	3U	34.21	TGCAGACAAGACTTTCTGTGCCATGACGATAGTGAACCAGAAATCATGGACAGAAGAAGTATGA
TP27760	A/G	3U	34.21	TGCAGGAAACGTCGGCCGTTCCGCCAATCCGAGGGGGCTAGATTCTCCGAGCGCCTGCTTCAGC
TP30567	A/G	3U	34.21	TGCAGGATTGGGCTGGCGTTATACAAGGTGAGTTTGTCCTCATGTTCGCCATTAGGGCGCTCAT
TP34868	A/G	3U	34.21	TGCAGGGGCTCCACATCTCATAGGGGGTTAGTTAGTCTGATTAAAGCTAAACTAATTGGACCAG
TP37762	C/T	3U	34.21	TGCAGGTGTTCGGCGCGATGATCGGGGAGGGACACCAACCCGACGACACCCTTGGCGTGCACGA
TP54	A/T	3U	34.21	TGCAGAAAAACTGCACTGTCAGATCTGGACAGCCAGCTTCTAGGTGAAAAACGAGTAAGTTATG
TP4365	G/T	3U	34.57	TGCAGAGCAGGTGCGACGGGGGCGGAGCAGTGCAGGAGCATCAGGTCGCCGAAAAAAAAAAAAA
TP9794	A/G	3U	34.57	TGCAGCACATATACTTCTTCCTTCTCCATCGCTCAGCTCCCCTGCCCCATCCTCACAACTCTAT
TP10424	C/G	3U	34.93	TGCAGCACGCGGTCCCGCGGCCACTGCTGGGTGAGGGGCAGCTCCAGCAGCTGCCTCCAGAACT
TP15725	A/C	3U	34.93	TGCAGCCCCGCCTCGCCAGAGGTAAAACCGCCGTTGCCGCCGCCGTTTTTTTTAAGAAACCCGA
TP16866	A/G	3U	34.93	TGCAGCCGCCTATACCGTGCGGGATGCTACCCGAGAACTCGTTGTGATCGAACACAAGAAACTG
TP30168	A/T	3U	34.93	TGCAGGATAGAGATCGGAAAGCAAACGGAAGCCCATAATGGCATCTCCAACTCTCAAACCGTCC
TP33544	C/G	3U	34.93	TGCAGGGACGATTGCGCCCTGCTGTCCTGCGCTTGCAGCAGCGACGCCCCGAACCCGCCGAACA
TP45176	C/T	3U	34.93	TGCAGTTGCGGTAAAATGGTGACATTTCTATGTTGTTGCCAAATACACAACCAAGTACCAACAC
TP4720	A/C	3U	34.93	TGCAGAGGACACCATATCAACTTGGCGCATGATGAATCGGTCGCAATGTCAAGCATCAGAAGGG
TP25366	A/G	3U	35.67	TGCAGCTGCAACAGTCATTCCCCGACCCCCCTTATCAACCCTGGATCCAATGAAGCTTTGAAAA
TP31415	A/C	3U	35.67	TGCAGGCCCATTAACTCACTGATACTTCCGCTAAGCTGCTCGATAGCAGTACGTCGAGCGCACC
TP6716	C/T	3U	35.67	TGCAGATGAAGTGGCGGCAAAATCCATGACCATGATGTGCTTTTGACCCGAAAAAAAAAAAAAA
TP7482	A/G	3U	35.72	TGCAGATTCACAATTACAGGCTGAAGCTAGTAACTGGATTTGGACAATCCAGTGACAGATATCA
TP20164	C/T	3U	36.1	TGCAGCGCGATAGCGTTAACGGAGGTACGCCCACGTCAACCGAAAAAAAAAAAAAAAAAAAAAA
TP2576	A/C	3U	36.1	TGCAGACACATGTTGTGCAAATTACAGTCTGGTCAAGATCCGAAAAAAAAAAAAAAAAAAAAAA
TP37650	A/G	3U	36.1	TGCAGGTGTACTATTGTCTATTGGCCATATGCATCGTTCTGATGCAGAGGCCGAAAAAAAAAAA
TP37752	C/T	3U	36.1	TGCAGGTGTTCAACATAGCCAGCTCGTCTAAATCTAATTATGATCGACCCGTCTTACTTTTCGC
TP42051	A/G	3U	36.1	TGCAGTGACACAACAATTAGGAAAAACAAGAGATAACGAATCATAATATTAGCAGTTGAAGTGA
TP35948	A/G	3U	37.26	TGCAGGTACATAACGTGGTCATGCTCATGCATCGATCGACCGAAAAAAAAAAAAAAAAAAAAAA
TP4218	G/T	3U	37.26	TGCAGAGATGTGACCGTCAAGCAGATGTTTACAGAGGAATCGAGTAGAAGGAAACAACTTATGA
TP18086	C/T	3U	37.42	TGCAGCCTGCATGCGTGGCGCCTACCACGAAACGCGGGCCCACGCCCCGAAAAAAAAAAAAAAA
TP2826	A/C	3U	37.42	TGCAGACCAGACCCAGAAGTTAGATTGCAAGTTCGCATAGGGCCGAAAAAAAAAAAAAAAAAAA
TP10082	C/T	3U	37.62	TGCAGCACCGACATCACCTTCGCCCAAGCCCCGCGCTGGTACTCCATACTCCACCGAAAAAAAA
TP12908	C/G	3U	37.62	TGCAGCATCAACATTGGTTACCGCATTGAGATTCGTGTCATCACTCGCTCGGTGATTTTGGCGA
TP26522	C/T	3U	37.62	TGCAGCTGTGCAGATTAACAATCATTCCTCGATGCTCAAATTACTCTGGTTTGATTTGATTTAC
TP34337	A/G	3U	37.62	TGCAGGGCGCCGCGCGGCGGGCTGACAAGGAACTTGAGCGGGGAGGAGGTCTGCACCTTGAAGG
TP30183	G/T	3U	37.75	TGCAGGATATAGAGCTGTGGTATGCACAAACAAGATACCCGACTGTTCCAAAAGTGCAACCTGA
TP3255	A/G	3U	38.09	TGCAGACGCATGAGAGCTCGCTCGACAGCAGGGGCAGCCGAAAAAAAAAAAAAAAAAAAAAAAA
TP33363	C/T	3U	38.09	TGCAGGGAACTGGCATCGTACTGATCCATCAGCCTCTTATCTACAACATCACGAATGCTTCCCA
TP23451	C/T	3U	38.34	TGCAGCTATAAATCCCGACCCCGATCGATCGATGGAGATGCGGAAATATCGGGTAGTAGGATCG
TP26628	A/G	3U	38.34	TGCAGCTGTTTGTCTTCTGCTCAAATTGGAATTTACAGCCAACTCTCAAAACTGTAACTTCGAA
TP4936	A/G	3U	38.34	TGCAGAGGCGTCAGTATTTACAGTACGCTACGATCAAAGGTGAAAAAGGAAAACTTCTCCGAAA
TP5388	A/C	3U	38.34	TGCAGAGTGTAGTGGACCTGGCCATGAACTGCCTCGAAAACGCAGCCATCAACAGGCCGACCAT
TP7246	A/C	3U	38.34	TGCAGATGTCACATTGCTCTTCACATGGGCAGTAAGTGCAAGCCGACACTCTGCTCTTCACAAT
TP922	C/G	3U	38.34	TGCAGAACACACACGAGTCAGAGTGCCAGCGTTCATACTCTGAACCTCGGCACGAAGCAAACGG
TP13092	A/T	3U	39.02	TGCAGCATCGCCGTTGGGGTCGTCGATCAGGACACATTGCAGGACTCTGCGCTTCACGGCGATC
TP15985	A/G	3U	39.02	TGCAGCCCGCACAAAACCCCGAGGCAACTTCTCTTTCTTTCTCCATAATAATAACTCCATTGCC
TP33295	C/G	3U	39.02	TGCAGGCTTTTCGCTTCTTCTTCTTCTTCTGCCGTCCGTGCAAGAACGTCCGCCGTTCGTGGAG
TP39263	A/G	3U	39.02	TGCAGTAGACAAGGGATGCAACAATGTGTGGTGGTGGTGGTGGTGGTGGTGATGTGTCAAAAAA
TP805	G/T	3U	39.02	TGCAGAAATGTAGGGAAAGGCTGCGTACAATAGACCCAAAGTGGTCGGACCCTTTCCCGAAAAA
TP2815	C/T	3U	39.05	TGCAGACCACGGCGCCTGACATCTTCTTGATGGCCACAAATATCACTGTCTTTTCCGCGCGAGT
TP30916	C/G	3U	39.05	TGCAGGCAGCAGAGGACATGGTACTATTTCCACCTAAAAAAAAGGACATGGTACTACACTAGAC
TP35319	C/T	3U	39.05	TGCAGGGTACCTAACATGTATTCAGAAATGCTTTTGTTGGGGTAAAATAAACCTCCGAAAAAAA
TP42055	G/T	3U	39.05	TGCAGTGACACGTACGCATGAACTTGCACGATCTATACGGCTTTAGCGTGTACCACCAGTACAT
TP43604	A/G	3U	39.05	TGCAGTGTCACGGGGAGACCAGGTGGAAGACGCCGTGGACGCCCTCGACCGCCGAAAAAAAAAA
TP44672	C/T	3U	39.05	TGCAGTTCGGCCCATACAAATTCGCATGGCAGAAAACAAAGATATGGTGTGCCTATTTGGTTGC
TP5464	A/C	3U	39.05	TGCAGAGTTGATCATTCGTTCCCAGAAGCTCGCCATTAGTTAAATTGATCATTGGTTCTCTAGA
TP5767	A/C	3U	39.05	TGCAGATAGATGCGGCGCCCCCCGTTTACCTGATTATTTATTGCTGCGGTGGCCGAAAAAAAAA
TP8681	C/G	3U	39.05	TGCAGCAACGCTAGAAGACCGCGGCGGCTACTCAACGGCGAGTCGCGCTCGGTGGTCCTCGACG
TP9903	A/G	3U	39.05	TGCAGCACCACCCCCGCTGCCTACTTTGCGACCAGGCACCCAAGACGATCTGGCACCTACTGCT
TP21249	C/T	3U	39.35	TGCAGCGGCGGCCAGGCCGAGGGGCTCAGCCCCAGCGGCCCGACGTCGGCGGAGCCCCACGCCA
TP25671	A/G	3U	39.35	TGCAGCTGCGCCCTTGCATAATTATTATCCCGCTTGATCCTACCGAATCTAGCGGGAGCAGTAT
TP31164	C/G	3U	39.35	TGCAGGCCAAAGTACTCCTAGCCCCCTAGTTACAGCGCGCGCGGATTCCCTCCCGAAAAAAAAA
TP32342	A/G	3U	39.35	TGCAGGCGGAGATGGTGCCAGGGCGGCAATGGGGGCCATCCGTGCGGTGGCGAAGGTGCACCTC
TP3736	A/G	3U	39.35	TGCAGACTTAAAAAAAAGCAATCGGATCCCTTGCATGCTCAAGCTCGAGAGGAGCCGCGTCACC
TP4307	A/T	3U	39.35	TGCAGAGCACAGTGAATTTTTGTCGCCGTCAGAACCAAACAAGGCAAGGGAGCGGATGGCTGGA
TP45246	C/T	3U	39.35	TGCAGTTGGATCTGAATCTGACGGCGATCGTTTGCTTCGAGGTGGTTTGCCCTAGAATGACGCC
TP20249	C/G	3U	39.41	TGCAGCGCGCGGCTCAGGCCTTGCCTACAGGGAGGCTGTTGTGCGCCGAAAAAAAAAAAAAAAA
TP26688	A/G	3U	39.41	TGCAGCTTAGAACACGGGAGGTCCATCGGGGCAGCTAGACCGCCGAAAAAAAAAAAAAAAAAAA
TP27589	C/T	3U	39.41	TGCAGCTTTGCATCTGAGAAGAAACCGTTGCTCCAATGCCGAAGGGCTACCCCGAAAAAAAAAA
TP29690	A/G	3U	39.41	TGCAGGAGGAGCGAATCGTCGAGGTCGAGGCCCGCGCCGAAAAAAAAAAAAAAAAAAAAAAAAA
TP32757	A/G	3U	39.41	TGCAGGCTATAAATAGGGGGCGCGGCGCACAAGACTGAACCACACACACCACAACCCACAAGCA
TP38613	C/T	3U	39.41	TGCAGTAACATGCTATTCTAAATTATCTTGGCAGATCCTTGAGAACATTATTTCTTGAAGAATG
TP39837	G/T	3U	39.41	TGCAGTATCTGATGTTCTGAACCAAGATCTGTGGCTCTGCCGCAATACAACCCTCCATGAGAAT
TP5002	C/T	3U	39.41	TGCAGAGGGATTAATTCATACTGGAACTAACTGCTTCTAGCAGATGCAACTGTGGGTCGTGCGT
TP5151	C/G	3U	39.41	TGCAGAGTAACCGTGGCGGACTTTGTTTCTGCACCTCTCGTTGCCTGGAGCCTAGGAACGATAT
TP29323	C/T	3U	39.71	TGCAGGAGCAACAGCTCGGAGGGTGCTGGTCTCCCAACCTTCCGAAAAAAAAAAAAAAAAAAAA
TP7693	A/G	3U	39.71	TGCAGATTGCTCGAAGCAGCAAACCTCGACGCCCGCGTTGCCCTTGTGCTCCCCTTCCGAAAAA
TP33799	A/G	3U	39.84	TGCAGGGATCAGAGGAGAGGAAGAAGGGGGGACGCCTCGCCATGAAGGCGCTCATCCTCGTCGG
TP30761	C/T	3U	40.07	TGCAGGCACAGGGCGAGGATGGTGATCCAGTTGTCACCCCTTGTACTCCCCTAATCATCGCCGC
TP32423	A/G	3U	40.07	TGCAGGCGGCGACCACCAACGTGCACAACGCGTCTCTGTCCTCCGAAAAAAAAAAAAAAAAAAA
TP40788	A/G	3U	40.07	TGCAGTCCCCCGAAGCATATCCCGAAGGGGAACCCCTTCTCGTCGTACCCCGCCGAAAAAAAAA
TP6470	G/T	3U	40.07	TGCAGATCGGCGAAGCTGCAAGCAAGGAGGATTATCAGCACAAGCAGTGACAAGAACCAGAGGC
TP13401	C/T	3U	40.43	TGCAGCATGGCAAGCTTACAATGGCAGTGGAGGATCTTCACTTCCTTTGAGGAACTACGGAACG
TP31821	A/G	3U	40.43	TGCAGGCCTCCAGCGTCAGAGGAGCAGCGTCTGTTACGTCAAACTTTGTGAGAAAGGCAATTAT
TP32548	G/T	3U	40.43	TGCAGGCGGTCTCAGACTTCCTCTCCGCGGCTGCACACACAAACGACGGCATGTCGACGGAAAG
TP33280	C/T	3U	40.43	TGCAGGCTTTCACTGTTTCATGTCAAATTGTTGTACTCCTCACCGTGAATTTCTTGTTTCAGTC
TP5583	C/T	3U	40.43	TGCAGATAACGAAGTGGAGCCTAGTACGTTGCTGAATCTTATCTCTCCCAGAGTAACGGATGAA
TP30770	A/G	3U	40.79	TGCAGGCACATGGCAATCGACTCGGCAGACCTGATGTATACTTCGAGCAATATGGAATTTTTAA
TP6190	C/G	3U	40.79	TGCAGATCCAGTCAGTTATTGTGAACTGGACGATCAAGATTTATTTTGGTGTCCGAAAAAAAAA
TP10950	A/G	3U	41.58	TGCAGCAGAGACGACGGAGAGGAGTAGCAGGGGCAGGAGGAGGAGCGCTGGCAGCAGAGCAGAT
TP12020	C/T	3U	41.58	TGCAGCAGCTGGTTCTGCTTCTTGTCCAGCATCAGGTTGATGTAGTTCTCAGTGTTGTCCACGT
TP19215	A/C	3U	41.58	TGCAGCGATCAACAACAGGAGACGTATACTTTACTTCGCTTTGTTCTCTGTTAGCCGAAAAAAA
TP21162	A/G	3U	41.58	TGCAGCGGCGAGCCGAGACTAAACCATGACACTGCATCATCGACGCAATCGAAAAACATCGGGC
TP3082	A/T	3U	41.58	TGCAGACCTCTCTCTGGATTCACCTACATATAGAGTTACGGAGAGTCGGAGACCATGAACCTTC
TP39387	A/C	3U	41.58	TGCAGTAGCATTAGCTGTTCTTCAGGTTCCCCTCAAAAGCCTCCTCAAAAACACATAAAAAGGA
TP4808	C/G	3U	41.58	TGCAGAGGATCGGCGTCGGGCTGGCGATCTCGATCGTCGCCATGATCGTCGCCGCGCTCGTGGA
TP7472	A/G	3U	41.58	TGCAGATTCAACCTGTCCTCAACTGTTTTTCAGTTAAAAATCAGTTCAGCACCACCTCTCACTA
TP32252	G/T	3U	41.99	TGCAGGCGCTAGCGTGCACGTTGCTGAGCCCGTGCGGCCGACCAGGCGCCCATCGGGCCGATTG
TP5765	C/T	3U	41.99	TGCAGATAGATGCCATACATGTCTTGCTGAAAACTCTCAAATTGACCACCCGAAAAAAAAAAAA
TP561	C/T	3U	43.48	TGCAGAAAGCAGTAACAGCCGTGCCATCTCAAACGAACGCCGTCTAGTCGCAGTAGCACCCAGT
TP12824	A/G	3U	43.53	TGCAGCATACGGGCTCGAGAGTGCATGGGAGTGGGGAGCCACTAACCATGATCCCGAAAAAAAA
TP27133	A/G	3U	43.84	TGCAGCTTGAAGCTCGCTGCCATCATCAAGCTTCACGACAAATCAAAGAACGGTAAGTTTGTAA
TP28214	A/G	3U	43.84	TGCAGGAAGCATACTATTGTTAGAAGTAGATAAATCTCCCATGAAATTCATTCTACAAAGGGTA
TP38895	C/T	3U	43.84	TGCAGTACAGTTCATTTGTCGAGTGATCGCCGTCGCCGCTGAGGAGTCGGGGCCACTACGCGCA
TP44304	C/T	3U	43.84	TGCAGTTCAGGGACATCCAGATCAATTGAAAAGGATTTTTTTTACTTTGTCCATAAGACCATCT
TP44345	C/T	3U	43.84	TGCAGTTCATCCCTGAGAGCGCAACATCCAGAGACGATCGTGTTTGGCCGAAAAAAAAAAAAAA
TP20213	C/G	3U	43.86	TGCAGCGCGCCGCCCACCGCCACCAGGTACAGCCCCGCGTAGAACAACACCGCGCTCTCCAGCG
TP30095	A/C	3U	43.86	TGCAGGAGTTATATGCCATGATCGCCAAGGACTCGGCGCGGGCTTGCTACGGGCCCAAGCACGT
TP4338	C/G	3U	43.86	TGCAGAGCAGATTGGTAACCCCGTGTCAGCTTGTGGCACTGTAAATAAAATTACTATTGGTAGA
TP14381	C/T	3U	44.19	TGCAGCCACTTTTCGACGAGGAGAGCCATTATGAGAACTTCACGAGGACGAGCGAGAGTACAAC
TP18246	G/T	3U	44.19	TGCAGCCTGTCCTGTCGTCCTTCGGGGCCGACCAGTTCGACGTGGAGGCCGACGAGGAGGAGCG
TP24110	C/T	3U	44.19	TGCAGCTCCCAAACACTGGTCCTTAGGGGAACGTGCACAAAGACTTCCCCGCTGTCATCGACAA
TP34421	C/T	3U	44.19	TGCAGGGCGGCTCGGTCAGAGAAAAGAAAGGCAGGGAGAGTGGGAGGAATGGGAAGGAGGAGAG
TP35516	G/T	3U	44.19	TGCAGGGTGACGCCGATCGCCCGACGTCCAAGAGGGAGCGCCGAAAAAAAAAAAAAAAAAAAAA
TP3571	A/G	3U	44.19	TGCAGACTATCCACAAGCTCTCGCCGAAAGCGTTCGTCATCGTGGAGAAGGGCGCCGAAAAAAA
TP42945	A/C	3U	44.19	TGCAGTGCTGCGGTCCACCGTGGTTGGCTGTTGGACAGGACTACACTGAATGCAGCACAGTGGA
TP13927	A/G	3U	44.2	TGCAGCCACAAAGGGTCAGACAGAGCCTAAGAAGAGCCGTCCAAGAAATGGAACGGAACGGAAC
TP24052	C/T	3U	44.2	TGCAGCTCCAGCTTAGGGGCGGTCCCGTCCCGCTATTAGGCCTAGCGTCATCATCTCGTGTCTT
TP30778	C/T	3U	44.2	TGCAGGCACCAGAACTCGCATTTCGCCGTCGTGTGACGCAATACTAGACAACGGCCATATGTTT
TP21065	C/G	3U	44.21	TGCAGCGGCCAGTGGTTTTAGGGTTTGAGAGACGAAGCCGAAAAAAAAAAAAAAAAAAAAAAAA
TP31111	C/T	3U	44.21	TGCAGGCATTATTATGTCACCTTCAGCATTGGGGATCCGAAAAAAAAAAAAAAAAAAAAAAAAA
TP26490	A/C	3U	44.89	TGCAGCTGTCTGGACTTTGGAGGCCAGACGAATGAATTCGAAAAGCAGCCCGAACTCGGACGGG
TP40702	A/G	3U	45.05	TGCAGTCCATAGGAATAACTTTTGTTTCAGACTTTTTGTATTTATACTTTTATAGGTTGGTTCG
TP8720	A/T	3U	45.22	TGCAGCAACGTGCGCGCGGGATTGCGCGGATTGGTGCTGGGGCATCGTGCGCGCGGGCGTGTGG
TP19691	A/T	3U	45.74	TGCAGCGCCACCACACCTCAGACCAAATTGTACGTCGATCGGGAAGCACCGAACCACAACAGAG
TP11341	C/T	3U	47.8	TGCAGCAGCAGCGTCAGCCCGACCGCGTCCGAGTGCGGCGACAGGCCCAGCACCCTGCCCACGT
TP12005	C/T	3U	47.8	TGCAGCAGCTGGAAGAAGCAGATGTCGCCGACGCGGAGGCCGTTGTCGACGCGGAACCGAAAAA
TP14878	C/T	3U	47.8	TGCAGCCATCTCACGGAGTCATCAAGAATTAGTGATACGACGAGGCTCAAGAACCATCCAACAC
TP28763	G/T	3U	47.8	TGCAGGACCTGAAGGTTGAGGCGGAGGAGGACTAGGCCCACTGGTATGTGTTGCTCCGAAAAAA
TP35092	C/G	3U	47.8	TGCAGGGGTCGGTGAGGGACGAGGCGGCGGAGCCGAGGTTGGTGAGCACGCGGCGGAAGTCCGC
TP3925	A/C	3U	47.8	TGCAGAGACACACGGCTTCGCAGAGAGGACACGTGTCAACTCGAGACGTGAGCCGCGCAGGTGG
TP4004	C/T	3U	47.8	TGCAGAGAGAAGAAAACCCAAAGACGAGGGGAGCGTGTTACCCTCAACGACGTCAAGCTAAATA
TP43479	A/T	3U	47.8	TGCAGTGGTGTCGTTCCTCAGCATGCCAGCGGCATCCTTCGTCACCGAAAAAAAAAAAAAAAAA
TP44571	C/G	3U	47.8	TGCAGTTCCTGGCCATGCTCCCTGACCTCCGCCCCAAAGTCAGGGTCATCGCGGAATGCGGCAA
TP44714	A/G	3U	47.8	TGCAGTTCGTTCGTTCGGTCTTTCTTTCCGTCACATCTCCCAAAGATGATCCCGAGAGAGAGAG
TP4480	A/G	3U	47.8	TGCAGAGCCTGCGTGGTCACACCTACCTGATCCCGCTGGGGCACCGCCTGTACGCGCTCAGCCA
TP7415	A/T	3U	47.8	TGCAGATTAGAGATAATAAAAGCATTTCATAATAGAACAAATTTTTTTTTCAAACCAACCATGC
TP26327	C/G	3U	47.98	TGCAGCTGGGTGGCGGCGAACGGCGTGACGCACCTCTTCTACGTGGAGGACCGAGGCCACCCGC
TP35461	A/C	3U	47.98	TGCAGGGTCGGGGCACTTAAAGAAGCCCCTCTATTAATTAGTTAGCCGTGTGCATCTTGTCACA
TP37873	C/G	3U	47.98	TGCAGGTTAGGTTAGCACGCAAGCGGCATCTCCTCGACTATCACCAGCTAAAAAAAGGTACGGG
TP42665	C/T	3U	47.98	TGCAGTGCCGCATCAAAGGAGAGTCGTCCAGCGGCGCCGAAAAAAAAAAAAAAAAAAAAAAAAA
TP9669	C/G	3U	47.98	TGCAGCACACAGCTGCCATTTCTACGTACCTAGCTAGCTTGCAGATTGACTGGTCTCACATGGT
TP33617	C/T	3U	48.31	TGCAGGGACTTCGCCATGCCTCCGAGCTCGCTTATTGTCTCCGCGTCGTCCCTCACGATCAGTT
TP18591	C/T	3U	49.65	TGCAGCGAAGGAAATGCAGCTCAGAAGTCAGAAAAGATGTCTGTGCGTGTGCGCGCGCGCGCGC
TP10338	A/T	3U	50.1	TGCAGCACGCCAAGTGCCCACTGTGATGTGACCCTCTACTAGCACTACTTAAACTAATAGATTA
TP1394	C/T	3U	50.1	TGCAGAAGAAGTCGACTTAGTCATAGGTGCTTATTTCATATCTTGCAATGGTTCAGTCGTGGCT
TP14869	C/T	3U	50.1	TGCAGCCATCGGCCTGCATCGTCATGCCGCCGCCGTGCCACATGGCCAGTTGGAGGAGGTCGGC
TP27492	A/C	3U	50.1	TGCAGCTTGTTGACGATCGGGATCACCGAGGAGCCCACCACCGCAGCGGCCTCGGCCGCCGCCG
TP32664	A/G	3U	50.1	TGCAGGCGTTCCAGCCAGAGTGATGCAGCTCGTCACCGATGTGGGTGGCCGAAAAAAAAAAAAA
TP37807	C/T	3U	50.1	TGCAGGTGTTTGATTGCAAGGAACCAGACCTCCTGCATGCCCAACGTACGTCTGGCCACGCCTG
TP39053	G/T	3U	50.1	TGCAGTACGCGGCGTTCGTCCCAGCTGGGGCCACATCCGCAGGCACTCAAACATACCCGATGCC
TP39342	C/T	3U	50.1	TGCAGTAGCAACAATAAGCGAGAAGTCGGCAGGAAAAAAATTGTTGCTTCCTCTATCTCCAGTG
TP39694	C/T	3U	50.1	TGCAGTAGTTGCCCAGGCTAGCTGCATATGATTAGTTCGGCCGAAAAAAAAAAAAAAAAAAAAA
TP42162	C/T	3U	50.1	TGCAGTGAGATTGTTGGCATGAATGAAGAGAATCCATCCTTGAGAGAAAAACTATCATGCGCTG
TP43347	C/T	3U	50.1	TGCAGTGGGCACAAATTGGGTTCAGCGGCGCTGAAAGGCGCGAAATAGGTGTTCCCCAAAGCCT
TP5749	G/T	3U	50.1	TGCAGATAGAAGTTGCCCCATCATGCTCAGATTTGTACAAGTGATACCGATTGGGTTGCTACTA
TP9605	C/T	3U	50.1	TGCAGCACAACGCGCTCGACCTCTGCCTAGGCCTCGCGCTCGACGGCCTCGCCGTGGCAAGGCG
TP13169	A/G	3U	50.28	TGCAGCATCTCGTGAGCAACCTTAAGGCCTTCCTTGTACCTCCCTTCTCTAAAGAACCCGCGCA
TP13921	A/G	3U	50.28	TGCAGCCAATTTTGCCTTCCTCTTTTTAACATGTGTCCTAACAAATCTAGAAGGTAGACTCTAT
TP14045	A/G	3U	50.28	TGCAGCCACATCCCCTCCTCTTCTGATCCGCCTGCCTCACAATCACAGCAAACTGACGGGCCTA
TP18350	C/T	3U	50.28	TGCAGCCTTCGATGAGGACGAAAGGTGGTGCAGCGAGGCCACACCGTGGGCTGGTGCTGCGGGC
TP18481	A/C	3U	50.28	TGCAGCCTTTCATGCAAGGGCAATCACGTTCCATCGTCGATCCTGCCACTAGAACAAGCCGACA
TP19592	A/G	3U	50.28	TGCAGCGCATCTCTTTTCTCACCGAAAACCCACGCACGATAGACCACATAGCTGGGCCCGTCAG
TP27293	A/G	3U	50.28	TGCAGCTTGGAAGAGCGGTGGCAGGCGAGGCGCAGGCACACGGCTGTGAAAACCGAAAAAAAAA
TP30817	C/T	3U	50.28	TGCAGGCACGGCCGCCAGGGCGCCAGGCCCAGCGACAGCCCCGCGGGCGCCGCGAGGAGCAGCG
TP32954	A/T	3U	50.28	TGCAGGCTCTGTTATATCCATATCCTTAATCGCCCTAACTGCATTCCTGCCGATTTATGACCGA
TP33786	A/G	3U	50.28	TGCAGGGATACCTCTAGCTGACGGTGTTGGCAGAGATCATGGGATGCAAGCGGAGATTGGGGAG
TP33883	A/G	3U	50.28	TGCAGGGCAAATAGGGCAACACGAGTCTGTGAGGATACCGTGATGGCATAGAAGAACAGTGGAT
TP37625	G/T	3U	50.28	TGCAGGTGGTGGTTCTGCACCCAGGTGAGGATGAGCTTGAGCAGCTGCATGGTGCCCTGGCGCC
TP38950	A/G	3U	50.28	TGCAGTACCCACTTCCAGTGGCAGTGCCTGCTGGCCAACCCGCCGCCGCTGCGGGCGACGACGC
TP39412	G/T	3U	50.28	TGCAGTAGCCGTGCATCTGCTATGACATCCACAAATTTTATCGTTCTTCTTGACACCTGTGGTA
TP39424	A/G	3U	50.28	TGCAGTAGCGAGCAAGCCACTCCTCCTCCTTGAGAAGCAGGCGACTCCCACCACCCTGGTCGTA
TP39769	C/T	3U	50.28	TGCAGTATATCGGGACAAGAGCAGTTCTTCTCTGGTCCTAGGTGGTGTAGACACCCGAAAAAAA
TP40599	C/T	3U	50.28	TGCAGTCCAGCCCAGTGAGTTTAGGCTGTGATCCACCTGACGGAATCCGATACAGTTGATTAAC
TP44920	G/T	3U	50.28	TGCAGTTGACCATAGTACTAGTACACTGAAACGAGGAAGGTTGCGTTTAGGGCTGTAGCTGCCG
TP14524	G/T	3U	51.28	TGCAGCCAGCATCAACGGCGAGGGCGACGGCGGAGCTACAACCATCGCCGTCGGGAGCTGCATC
TP1256	G/T	3U	51.62	TGCAGAACTCCACGTCGAGCAACGACAACCTGCGGCGCGCCGTGGTGTCCGAGGGCGCGCTGCC
TP13111	C/T	3U	51.62	TGCAGCATCGGCGGTCAGGCCGTGGAAGGGTCCTTTGCCTAAGGTACGCCTTCCAAACCTCACG
TP13115	A/G	3U	51.62	TGCAGCATCGGCTGCACGAGCGTCTCATGCTCATCACCATCAGCATCAACCTCGAGCACATACT
TP15986	A/T	3U	51.62	TGCAGCCCGCACACGCACTTTCTCGGCTGCTGATCCGCCATAATTCGCAAACATGGTCAAGTAA
TP1808	C/G	3U	51.62	TGCAGAAGGCTCCCGATTTCGTGGTACGCATGCCCTTGCTTTGTTTAACGCCCCATCCTCGACC
TP18372	A/G	3U	51.62	TGCAGCCTTCTTCTTCTTGCTGGTGAGTCGTTTGAGCACGGACGCCGCATCGTTGCCGAAAAAA
TP20088	C/G	3U	51.62	TGCAGCGCCTTTGTTTGCCCCGTCAGTCAGGTGCGTCGCACCTAGCCGCCGAAAAAAAAAAAAA
TP21640	A/C	3U	51.62	TGCAGCGGGGTCAGAGGACGCACCTAGGCGCACCCATATCCGCCTCAAGGCTGGATATGAGGGG
TP24153	C/T	3U	51.62	TGCAGCTCCCCGTCGTCCCCCTCTCGCCCACCCTCCCCTTCGCTCGCGATGGGGTCCGCGGCGT
TP25131	C/T	3U	51.62	TGCAGCTCTTCAATACTGGACAGTTCTTTAGGTGCTTGAACTCCGATAAAGTACCGAAACTCCG
TP25397	C/T	3U	51.62	TGCAGCTGCAATCGTTTATGGCCACGGTAGGACCCAGTACCTTGATTGGGAATTCCTTTTGTTG
TP27179	A/G	3U	51.62	TGCAGCTTGATGCATGGTATATTTTGTTGCTCTGAAAAGAAGAAAGAAAATTTTACAGGTATGT
TP31977	C/G	3U	51.62	TGCAGGCGACGAACGTCCTACTTGAGACCATTTTCCATGGAATCAAAATGATGAAACTGGCAGT
TP32865	C/T	3U	51.62	TGCAGGCTCGATCCATCATGGCGGCCTCCTCGGCCGTGCGGGCGATCTCCTTGAGCGCGGCGAG
TP33730	A/C	3U	51.62	TGCAGGGAGGCCTCCTTCCAGCTCGCGGCCGCGGTCATGAGCCGCCACGCCCGATGGAGATGAG
TP35339	A/G	3U	51.62	TGCAGGGTAGTGGTACAGGAAGGAAGAAACCGTGAAGGCATCAGAATTCAGAAAGCCCCGATCC
TP399	A/T	3U	51.62	TGCAGAAACATTCCTTGTTAAAATTCACATTTTTTCAAGAAATATTTGAAGCATTCAATATTTT
TP40254	A/G	3U	51.62	TGCAGTCAGATTTGGCGAATCCAACCCCCTAAAGGTCCACGGGCGCGACCCCGAAAAAAAAAAA
TP420	G/T	3U	51.62	TGCAGAAACCGCACGCCTCTGACCCTGTTGTAGATGTGCTCGCAGTTGGCGTCCATGTTGCGGT
TP43454	A/G	3U	51.62	TGCAGTGGTGAATTACTAACGCTAGAAACGAGCGTAGGGGTAGGTGAGGTGAAGCCGTGAAGGT
TP4355	A/G	3U	51.62	TGCAGAGCAGGATTGCCTCCAATAGCCGCTCGACACGCGCCCCCCTCCGTCCTCCTTTCACCTG
TP4800	C/T	3U	51.62	TGCAGAGGATAGAGACCCACGGCGTACAGCTTCCTCCTACCTCGCCGTCGTCTGGTTGTTCTTG
TP5136	C/T	3U	51.62	TGCAGAGGTTGTCGTACCACGGGGACTGACCCTGCTGCTCATAGAGGTCATGGAGTGTGGTCCT
TP5698	C/T	3U	51.62	TGCAGATACCATCACTAGGCTGACCAAGATCCGAATCACCAACGCTGCCTGAGGTACCATGCAC
TP6525	A/C	3U	51.62	TGCAGATCTAAACACCACATGTTGAGAGGTAGCTTAACCGAAAACCGAAAAAAAAAAAAAAAAA
TP8726	A/G	3U	51.62	TGCAGCAACTAAGAGCAACTCTAGCAAACCCCCCAAAACGCCCGAAAAAAAAAAAAAAAAAAAA
TP12160	A/G	3U	52.36	TGCAGCAGGATCAGACGCCAAGCCATATGGCTGGGTATGCTGGTGTACCAAAGTTCTATCAAAC
TP24505	C/T	3U	52.36	TGCAGCTCGACAAGGAGGTTCGCTCCCTGATCAACCATTTCTCGGAGATGTCGCAGAGGCCGAA
TP38074	T/C	3U	52.36	TGCAGGTTCTCCTACTTCCTGACACCTGACGATTCCAAGAGCTCGAGCTCCACCAGCGTGGTCC
TP39626	G/T	3U	52.36	TGCAGTAGTCGTAGTTCCCGACGCGCATCTCGAGGTTTACGGCGCCCGAGGAGGGCCAGAGCGG
TP7943	A/T	3U	52.36	TGCAGATTTTTCGCCGATCGTTTGTCATGTTTCTCTCGTGACAACCTTCGGAGACACTAACCCC
TP14955	A/C	3U	52.41	TGCAGCCATGGCCAATCGAGCGTGCAGCCATGGCCAGTCCGATGGACGGCGACGACACCAACGG
TP15455	A/G	3U	52.41	TGCAGCCCATTTATGGACAGAAGAGTATTAGTTAAAATACATTAAGAATGAGAGGCTACCTTAG
TP19299	C/T	3U	52.41	TGCAGCGATGGAGAGGCGCGATTGAACACGACCGCGCTCCGAAAAAAAAAAAAAAAAAAAAAAA
TP20216	C/T	3U	52.41	TGCAGCGCGCCGCCGCGCCTGGAAGTCGCGCCTCCCCTCCGTTCCTCGCCTCGCCGAAAAAAAA
TP21814	A/C	3U	52.41	TGCAGCGGTGAGTCAAGACTAAACCGTGACACTGCACCGTCGATGCAATTGAAAAGAACCGAAA
TP24986	A/G	3U	52.41	TGCAGCTCTATTTTTTTGAATTAATTGAAAAAAAGATCATGATTTTGAAAAAAGTCTTCATCGA
TP25398	C/T	3U	52.41	TGCAGCTGCAATCTTCTGCACTATGGACCAACCCAGTACTTTGATTGAGAATTCTCTTTACTGG
TP26887	C/T	3U	52.41	TGCAGCTTCCCTGGAACTAGTTACCCCAACTCTATCACATATAAAATAATTCCGAAAAAAAAAA
TP2859	A/G	3U	52.41	TGCAGACCATGAGAAGAAACACCTCTTCCCTGCCTCGCTCGTCACAGATCAGCTATTCTAGGGT
TP29577	G/T	3U	52.41	TGCAGGAGCTCTGGCGGCACCTGGTCAGGAATGCGCGATTTGCCAGTTGGAGTTGGAGACTGGT
TP34798	G/T	3U	52.41	TGCAGGGGCCATCCAGCAGCAGCCAGCGGTAAATAAACCAGCCCATGAATATCAGAACATGTCA
TP36371	A/C	3U	52.41	TGCAGGTCAGCGCGAGATCGGGGCTGCGGTGGTAGCTACGGGCGCGGGGCGCCGAAAAAAAAAA
TP36451	A/G	3U	52.41	TGCAGGTCCACCAACTATTGGGCCTTGCCCTTTTCAGTTTTTTAGCAGAACTTGTAAAAAGAAT
TP4166	A/G	3U	52.41	TGCAGAGATCACTAGACCCTCCGCCGTTGACAAATGGGAGTTCTCCGACTCGACCTCGGAACGT
TP42324	A/G	3U	52.41	TGCAGTGATTTGATGTTGCTCCATATCCCAGTCTCCAATGAGTAAAGGCATACGGAGACTCTCG
TP42642	C/T	3U	52.41	TGCAGTGCCCCCTACCTCAAATAAGTCGTGTCCCAACACGATGATGTCAACACGGTCTACATGT
TP43468	A/G	3U	52.41	TGCAGTGGTGGAGGCTATGGAGGCAGAGTTAGATAGCGTCGAGGCAGAACTGAAAAAGGTGAAG
TP43525	A/G	3U	52.41	TGCAGTGTACACCGTCCTCAGCCAGCTCTTCTCCTGTTCCGCGTTACGATCACTCCGCCTCGAG
TP44929	C/T	3U	52.41	TGCAGTTGACGACGAGGATGTCGATGGTGTCAAGAGGGACGTTCGTCTTGGAAAGCAGCTCGTC
TP8113	G/T	3U	52.41	TGCAGCAAACTCGTCCACGACATGCTCGCCAAGGCGCTGGTGACCAGCGAGCACGGCCTCGCCG
TP22271	A/G	3U	52.63	TGCAGCGTCTGTCCATGACACCCGAGATTGCCCGCGCAATCGTCGGCCACAACAGCGTCCGTCC
TP23478	C/T	3U	52.63	TGCAGCTATCCCATATGTCCAGCCAACGGGACGGCGCCCCGTCCTCAAGATGTCTCGAGCACGT
TP25722	A/G	3U	52.63	TGCAGCTGCGGGAGAGGTTGCGGCGCATACAGAATTGGATCGTCAGTGGCGTCTACAGCGACCT
TP27599	A/G	3U	52.63	TGCAGCTTTGGATGAGTAGATCCCCACTGATTTGATGTCTATGGTAGCATCAGCAATCGTCGGC
TP31798	A/C	3U	52.63	TGCAGGCCTAGAGCGTCAGGTCCGCAAGGAGCGGGCAGCCGAAAAAAAAAAAAAAAAAAAAAAA
TP33510	A/T	3U	52.63	TGCAGGGACCACCTATGCGCCGCTTATTGCGGCAAGGAGTTGCAGTTTCGCATAGGAGACGACT
TP3392	C/T	3U	52.63	TGCAGACGGCGGCGGCACGGACGAGGCTGGTGGGGAAGCCGACGCGGACGATGATCTCCGCCAG
TP35554	A/G	3U	52.63	TGCAGGGTGCCATTAATCGTGTCTGCTCGAGCTTCGTCTCTATGACGAGAGGGGAGGGCCTATC
TP39212	A/T	3U	52.63	TGCAGTACTTCAACGTCAGCTACAACAGGCTCTGCGGCCCCGTGCCGACCGAAAAAAAAAAAAA
TP39218	A/T	3U	52.63	TGCAGTACTTCTTTAGTTCTAGCGTAGTTTGGATCTAGCATGCACCTTGGTTGTTGCCTCCCTC
TP394	A/G	3U	52.63	TGCAGAAACATGCAGCATATATAAATTCATTACTTTATGAGTATGTGTGATGAATTGAAGTTAT
TP42654	C/T	3U	52.63	TGCAGTGCCCTGACCTTGGGTCAATGACTGGTCGGCCCCACATACCGTGGGCTCGTAGGGTCGC
TP43066	C/G	3U	52.63	TGCAGTGGACTGGGCTATGTCAGAGCTATTGAACAACCCTGAGGCAATGGTTAAAGAACAACAA
TP6484	C/T	3U	52.63	TGCAGATCGGGGCGGAGGAAAGGTTAGAGACATACGTCCGAAAAAAAAAAAAAAAAAAAAAAAA
TP11753	C/T	3U	53.09	TGCAGCAGCGCCGTGGCGGACATGCTCGCCAGGCTGCCGTTGCCCGAAAAAAAAAAAAAAAAAA
TP27773	G/T	3U	53.09	TGCAGGAAAGACAGCATCACAGTCGAGCACAAGCCGAGCGGCCAGCCGTGCTCCGTGCGCCTCC
TP34618	A/G	3U	53.09	TGCAGGGGAAATCGGTCTCCAGAATCGCCACCACCAATGCCACTCGGTTCCCCTCCGCAACCTG
TP5069	A/G	3U	53.09	TGCAGAGGTACCGCGAGGGCGAGGAGCTCGCGGCGGCGCTCAACAACCACAGCAGATCACCGAA
TP13486	C/T	3U	53.37	TGCAGCATGTCCGCCTGCGACGCGGCGACTCTGGCGCGCACCATCTCCGCGCCCGAAAAAAAAA
TP13438	C/T	3U	54.04	TGCAGCATGGGCTAGTCGCCGTGAACCCACTTTTGCCGAGTGCGGCTCTCGGCGTACTGAAGTT
TP18742	G/T	3U	56.12	TGCAGCGACCCGATGTTCCTCGGCGGCTGGACAGAGCCCAATGCGAAGATGTGGCAGGCATCTT
TP34258	G/T	3U	56.12	TGCAGGGCCTGTGGTTCTACCAGACGGCGTTCACGCTCTACGGGCCGATGCTCCCCGAGGGGTG
TP7134	A/G	3U	56.29	TGCAGATGGGCAACCTAGATTGGTAACGATGTCGGAAGTGATGGCCAGCGTGACGCGAGCACCG
TP14836	T/C	3U	56.46	TGCAGCCATCCGCCGCGCCGCAGATCGTAGATTGGTCGCGCCACCACACGCCTTGGGGTCGGCC
TP18595	C/T	3U	56.46	TGCAGCGAAGGAGCTTCATCAAGGGCTTCGGCTTACCCAAACACCAAACTTGCTGCTATATCCT
TP30703	A/C	3U	56.46	TGCAGGCAAGTATAGCAAGGGGAAGGGTGATCTTGTAGACCATGTCAGGCACGACGATCCGAGG
TP41378	A/G	3U	56.46	TGCAGTCGGGGACAATGCTGAGTTTGTGTTCTTGGATTATGCGAGATATGGTGTTGTCCTTTAT
TP1597	C/G	3U	56.8	TGCAGAAGCAGGTGATCCGAGTCCGAGGCGCAAGTGAGCTTGAGGGGCTCAGGTGAGGGCACGC
TP36201	C/T	3U	56.8	TGCAGGTATATCATCTGCATGTGATTGTCTCTGTGTTTTCTTATTTCCCTTTCAAGTTCCTGGC
TP15429	G/T	3U	57.47	TGCAGCCCATGCCTTGCTGATTGCGGTTGCCATCGAAATATCTTTGTGTTAGTTTCATCTTTGT
TP30238	C/T	3U	57.47	TGCAGGATCCGTTCCAGGATCCCCAGAACCATCATGCCTGGGAGCTCGCGGCCTTGCACTAGTA
TP9994	C/T	3U	57.47	TGCAGCACCCATATACTAACGGCATTCTTGTCATCGTCATTGTAATAGATGCCGAGCGTGTCAT
TP22515	C/T	3U	57.8	TGCAGCGTGGTGGCCTCCTGCGACGGCCTCCTCCTCCTTTCCTATGACGCGGAGGGCGCCTGCT
TP29976	C/G	3U	57.8	TGCAGGAGTACGAGCGACGCCTCTCCACCGCGGCATCCCGAAAAAAAAAAAAAAAAAAAAAAAA
TP42955	C/T	3U	58.14	TGCAGTGCTGGAGGCAGGGCGGCGACGAGGGGAAAAATCATTCACGAGAAGGCGAGAGGATGCG
TP42074	C/G	3U	58.47	TGCAGTGACCAGTGAGGACCATGGCATCAAGATAGCCCAAAAGGGAAACACCGCCGAAAAAAAA
TP33756	C/T	3U	62.37	TGCAGGGAGGTCAACTTCCCAAGCCAATCGGGCATCCTTGTCTTCCTGTCAGTATGCAGGCACA
TP18618	A/T	3U	62.85	TGCAGCGAATAATAACATGAACGGTTAAAGCACGGACATCCTGCAATGTCCGAAAAAAAAAAAA
TP1185	C/G	3U	64.19	TGCAGAACGCTCAGCAAAACAGGATGAAGCTCCTGATAGAAGGAGCCATCGTAGACTTATACAG
TP22295	A/C	3U	64.19	TGCAGCGTGACGCCCTTGGCTGGCCCAGTATGAGGCTTTCGCGCACGAGCCCGTGTCTATTCAG
TP24506	C/T	3U	64.19	TGCAGCTCGACAATGGGTACGGCGCGCCGTTGGTTCTGGGGCTGTGCTCCACGATCCCGTACAC
TP9814	A/G	3U	64.19	TGCAGCACATGAAAGGCCCATTCCCGTTGCTCGTGCACGATCTTGGCAACCGTACAGATGACTG
TP15891	A/G	3U	64.37	TGCAGCCCCTGTCGAATTTGTCCAGACATATATGTCTTTGAGCTGGGTGCGCAGCTAGCCTCCT
TP1641	A/C	3U	64.37	TGCAGAAGCGACGCCTGCATGCGCGCGCACCGCTTCCAGCCGCCTAACTGCCCGCAGACCGAAA
TP17726	C/T	3U	64.37	TGCAGCCTCCCTCGCCGCCCTCCGCTCGCCGCTAGTCCCACTCCCCAATCCCTCACGGCTCTCC
TP1893	C/G	3U	64.37	TGCAGAAGTAGGTAGCGTGGATTTGGTCCCTCTATGCCATTGTGGTGCTGTATAATTTATTTAT
TP19014	A/G	3U	64.37	TGCAGCGAGATCGGCGGTTGCAATGTTGGCGAGATCCCACAGTACAACGAGCAAGCGCTGCATT
TP20327	A/G	3U	64.37	TGCAGCGCGGCCACTATTGGCATTTTTTGCTGGAAAACCCTGTTGGCAGCATTCTACGGCAAAC
TP23508	A/G	3U	64.37	TGCAGCTATGATTTTCCATGGCTGAAAGCAACAGGGGCATGGAGATTAAAATAGATGTACAGGG
TP30588	A/T	3U	64.37	TGCAGGATTTCTCAACGCTGATTTTATTAAGACATCAAAAGCCAATAATACTGAAGTATTCCTT
TP36826	G/T	3U	64.37	TGCAGGTCGTCTGCCTGCCCCAGAGCAGCGAGCTGAAGCCGAGCCGCTGCTTCTCCTCGTCGAA
TP40424	A/C	3U	64.37	TGCAGTCATTGTTGGGTATGTCTTCTTTTGCACGCTCATGTCAGTTGAGCCCCATGTGAAGATG
TP40996	C/T	3U	64.37	TGCAGTCCTCCGTGCATGCTTCCAACTCCGCTTGGAGGCTATAATTACATGTAAACAACTACCT
TP426	C/T	3U	64.37	TGCAGAAACGAAATGATTTTTAAGAGACAAACTCTTACAAATTTTTTGCAGGTTATATATAGAG
TP42687	A/G	3U	64.37	TGCAGTGCCTAACCGCAACCAAGAGGGAGAGCCAACCCAACCGCAAGGTGACCGAAAAAAAAAA
TP42871	A/G	3U	64.37	TGCAGTGCTATGAAAGACATGGCTTCTTTGCGCAGAAATGTTAATCATAGTCTAGTGTACTACT
TP8333	C/T	3U	64.37	TGCAGCAAATGCTGCAACCATAGGATGTTGCTTCGCTGGAAAGGGGATGCTCGCAGCAGCCACT
TP8727	A/C	3U	64.86	TGCAGCAACTACAAAACATAATCGTGCGTAAATCTAAATTGAGTATAATTCGTACCCAGCCGCC
TP18049	C/T	3U	65.53	TGCAGCCTGATACAGCAGTGTTTCTCTGCTGCTTGATGCTTCATTTACATCCTTCTTCCTCATA
TP2998	A/T	3U	65.53	TGCAGACCGATTTCAGAACTATGCCCTGGAAATCTCGTATGACAACCCCGAAAAAAAAAAAAAA
TP5712	A/G	3U	65.53	TGCAGATACGGAAGGTACATCGTTTGGAGGATGAATAGACAACTTTTAAAATCATATCGGCAAT
TP39049	C/T	3U	66.12	TGCAGTACGCCTGCGACTTACGGTTTTGTCTAATTTTTTAAGAAAACCAAAGAAAGGAGGAATG
TP28861	C/G	3U	67.62	TGCAGGACGCCTACGGCCACTTCAGGGAGAAGGTGCAGATACGGGTGTGGCGCCGAAAAAAAAA
TP30728	A/C	3U	67.62	TGCAGGCAATGGAGCATGCAGGTACATACTTGTGGCCAAACCTCCATCGAGAAAAGGAAACTAA
TP34913	C/T	3U	67.62	TGCAGGGGCTTTGGTGGGATAGGAGGGATCCTTCGCTACCAGGTTGAGGTGAACGCTTATGAGG
TP7271	C/G	3U	67.62	TGCAGATGTCGCCTTATCTTTGAAGTTCCTCTGATCTGCCTCCTGTGCCTCGTTGAAGTGCTTT
TP36524	C/G	3U	68.62	TGCAGGTCCGCCGTGATGGAGGAGGTGAACGACAACCAGCTACCAATGGAGCCGAAAAAAAAAA
TP37886	A/G	3U	68.62	TGCAGGTTATGTTTGTCCTCTCCAAGCCAAACGTCTTGACTACCTCACACTCAGAAACCTAGGT
TP40926	G/T	3U	68.62	TGCAGTCCGCGAAATCCTTTCTGGATCAGGGGCAGTTGCAAAATCAACAAGCATAACCACTGTG
TP16512	A/C	3U	69.14	TGCAGCCGAGATGACAAGAGGACCAACTAAGGGGGGCTCGACAAGGCGGCGCTGCCAGCCATGC
TP2193	C/T	3U	69.14	TGCAGAATGATCTTCCCATCTTCATAGGGAGCTTTCTACGAACAACATTAGTGGATCCATACCA
TP24179	C/G	3U	69.14	TGCAGCTCCCGCCTACCAGAGGGCGGCTCGATGCCAATCAGCTCGCAGTGGACCTCCTTCAGTA
TP269	A/G	3U	69.14	TGCAGAAAATATCATTAGTGCCCTTTCCCAAAGAGCGCTACAGCTATTCATGTATAGCAGTAGC
TP33288	C/G	3U	69.14	TGCAGGCTTTGTAACTTGTGCACGCGCGCCAACGAGGTGGCACCCCACCTGTTCTACAAATGTA
TP43053	C/G	3U	69.14	TGCAGTGGACGACAAAGAAGGGTTTATGGTTTTCTGTTAGCAGGTGGCCCCCCACATCGCTTTG
TP5279	A/G	3U	69.14	TGCAGAGTCGGATCCATCCTGCATGGCGCCCAGGCACACCGCTGTAAACGTCGCCACAAGCTCT
TP25806	C/T	3U	69.86	TGCAGCTGCTCCTCACCGCCGTCGTCGCCGCCGTCGTCGTCAAGGTCCGCGCCATCCCGCACTT
TP35662	A/T	3U	69.86	TGCAGGGTTAAAAGATGGTTTTGTTTTGCTCCCATGGTTTGGTTTGGGGTTTAGGGCAGGGCAG
TP1134	C/T	3U	70.7	TGCAGAACGACGGGACCATCCATCCATCGGTCGTCCTGCCTGCGATCGCTGTACGCTACGCAAC
TP16613	C/T	3U	70.7	TGCAGCCGCAAAACCGAATATTCACGTATATTCTTCCCCACGTCTTCTTCTTTCTCTTGCCCGT
TP21788	C/T	3U	70.7	TGCAGCGGTCTCCACCGCGGTGCAGTGTCCCAGCGGCAGCTGCCGTGGCCCTGCACCGTCCGAA
TP31478	C/G	3U	70.7	TGCAGGCCCTCAGCGGCTCCAACATCGGCCTCATCATCGACGTGGCCAACGAGGACCTCGCCTC
TP31710	C/T	3U	70.7	TGCAGGCCGCTGGGGGACTGCTCCACGGTGGAGACCACTAGTAATGTACGTAAATACTTAATCA
TP34793	C/T	3U	70.7	TGCAGGGGCCAAAGGCTGGATCTCGCAGAATCGTGAGGTACAATTCGTTTCTTCCTGATTTGGA
TP40705	A/G	3U	70.7	TGCAGTCCATCAACGACAACAACACTTGGACGCTCACCACGCTCCCGCCGAGCAAGCAGGCCAT
TP5442	A/C	3U	70.7	TGCAGAGTTCGTGAAGCAGGACAAGAAGTTTGTCCTCGTAGCTGACCGTCCTTGGACCATCATC
TP7076	A/G	3U	70.7	TGCAGATGGATTCTCTTTTCAAGAGTAAAAGAATAAAGGGTAAGTGGATAACTGATTTAATTTA
TP9324	A/C	3U	70.7	TGCAGCAATAATAAAAGGAAATAAAAACAGATCTAGGACAACTCGAACTGAACATATTGAGAAG
TP5895	A/G	3U	72.09	TGCAGATATTATTATTTTTGGATAATTTCGTTTATTTTGGTTCAAAATCCGCTCATTTTTCGTT
TP19890	G/T	3U	72.45	TGCAGCGCCGCAGCCCAGGACCTGCGCGCGTCTGGGTCTCGGGCGCCTGGACCTCGAGCTCCTT
TP31698	A/G	3U	72.45	TGCAGGCCGCGTAGGGCGAATCCCCGCCACCGCCGTCACCGAAAAAAAAAAAAAAAAAAAAAAA
TP32690	A/G	3U	72.45	TGCAGGCTAAAATCGTGGAGCTAGAAAGTAGGTGCTCCGCACATCCCGTAATTCCGCAGAGCCG
TP23347	A/G	3U	72.81	TGCAGCTAGGCTTTTCCCTAGTAGTGATAATGCGGTATTGCGTTAAAGCGGGCGAAAGCTTCAC
TP35059	G/T	3U	72.81	TGCAGGGGTACAATGTTCAGTTATCGGGAAACTCATACTGCATGAACTGAAAACTTTACTAATA
TP36321	C/T	3U	72.81	TGCAGGTCACATGCAAGCACTACCCATTCCGAGTAGTTAACCAAGTCGTACTAACGCCCTGTTC
TP3780	G/T	3U	72.81	TGCAGACTTTGTGAAGTTCAGTAGACTACACAGGACGGCCTACCGAAAAAAAAAAAAAAAAAAA
TP46096	A/G	3U	72.81	TGCAGTTTTGAACTCAGTACTATGTCGACTAATCCAGCAGTAGTCTAGACTAGTCACGATTAGT
TP6807	C/T	3U	72.81	TGCAGATGAGGCTATGGAGTTGGATGATCTTCAGACCCTCTCGAAGGATTATGTCTTATCAGGG
TP1049	A/T	3U	73.46	TGCAGAACCATTTGTTAGCCAGTTGAACACGCATATACTAGTCTAGTCCGAAAAAAAAAAAAAA
TP35043	A/T	3U	73.46	TGCAGGGGGTGGCAATGATGGTTGCGGCGGTGTTGTGGATGGCGATTGATGTGGCAGCGGGAAT
TP40355	C/G	3U	73.46	TGCAGTCATCTCACTCAATTAATCTTTTAGTTCAAGGCCCAGGCTGTGTGTGCGACAATGACAG
TP200	A/G	3U	73.96	TGCAGAAAAGACTTTACGCTGATTAGAAAGTATCAATGGGACCACACGAGAACCCATTCAGATC
TP19770	G/T	3U	74.32	TGCAGCGCCATCTTATTCTTCGCCCGTCGGTTCTGCTCGTCTTCTTGTTTGGTTTCGCAGTTGC
TP23236	A/G	3U	74.32	TGCAGCTAGCACCGTTGAGAATAGGAACAGCCGCCGACGACCAGTGGTCAAACCGTAGAAAAAT
TP40120	A/G	3U	74.32	TGCAGTCAATCAAACACGCCCAAAGCATACACAAGACCAAAAAATATTAAGAACACAAGAAAAA
TP56	A/G	3U	74.32	TGCAGAAAAAGAACGACAGCAGTGGAGATGGTAGTTGTGTTTCCAAATAAGTTTGTCTCTTTAT
TP27588	C/G	3U	74.46	TGCAGCTTTGCACCACACGATCAAAGCACTTGTTTTCTCACGTACGTTAGCATCCAGTCTCCGT
TP1667	A/C	3U	75.04	TGCAGAAGCGGCGGCGAGGAATGGCTTCGTCGGAGAAGCGCCGAAAAAAAAAAAAAAAAAAAAA
TP18351	C/T	3U	75.04	TGCAGCCTTCGCGCCCAACCCCGCTGTTAACCGCCCTGGTCTTGATGATCGATGGAATGGAAAG
TP3121	C/T	3U	75.04	TGCAGACCTTTAGCCGTGGGTTGATTGAGAGGGGAGGACGAGAGGTGAAGCTGCATCGCCAGCC
TP38571	A/G	3U	75.04	TGCAGTAAATCACTGTAATCTATATGAAGCATACAACAATTAAAGACTTGTAGCATATAACTTA
TP28327	A/G	3U	75.54	TGCAGGAAGGTGACATTGGGCTTGACCACCCGCTCGAGGTCGGAGCCGAGAACAGAGCCGCTCT
TP39441	C/T	3U	75.54	TGCAGTAGCGTAGCGAAATAGCGATTGATTCTTTCGGTCCGTGAGTGCTAGCTACTCGGTGGGC
TP43892	C/T	3U	75.54	TGCAGTGTTTTCTACCCCGTTTCCTATATCAAACCAGGAATGACCAATCGTTCACCATTCATGC
TP37632	C/G	3U	76.91	TGCAGGTGGTTAACTCGGTCAGGAACTTTCGGTTTGATGGAGAGGGGAGCATTGGGAGGCCGTA
TP38896	A/G	3U	77.63	TGCAGTACAGTTGCCCAGCACACACGGACTAGCTAAGCTAGCATGGGCAGAAAGGTGTGCATCT
TP40369	C/T	3U	77.63	TGCAGTCATGCACACCTAATAGATCTGTTTCCTACCTAATTCAGGAGACTCATGCTAACTCACA
TP14436	A/C	3U	78.22	TGCAGCCAGAGCGTATGACACCAAGTCCATCACCGACAATGCCGAGCTAAAAAATTGGATGGCG
TP16657	A/G	3U	78.22	TGCAGCCGCACCATCCACATGGTGAGAGATATACCTCACCATCCTGGGGACACACCAACCACCT
TP27943	A/G	3U	78.22	TGCAGGAACGAGTTTGACATCAAATCCTTGACGATCTGAGCAGCAGAGAAATTCAGCACATTGC
TP26301	A/G	3U	78.56	TGCAGCTGGGGTGGTGGTACTGGCTAGACAAACTCGAGCTCCGAAAAAAAAAAAAAAAAAAAAA
TP37355	G/T	3U	78.71	TGCAGGTGCTGGTGCGGTTGATGGTCAGTTGGTCAGCAGGCAAAGACACGTACATCAGCTTGAG
TP34744	C/G	3U	79.07	TGCAGGGGATGGTATGTGGGTGCGGACGGCTGGCCTGGACACCTAAACTGGGCGGCGGCGGCAA
TP29945	C/T	3U	79.57	TGCAGGAGGTGTACACGGTGAGTGGCCGCATTCTTCTTACTTACCGAAAAAAAAAAAAAAAAAA
TP31245	A/G	3U	79.57	TGCAGGCCACCGTCGATTAGGTGCACATGGGAGTCGATGAATCCCGAAAAAAAAAAAAAAAAAA
TP37444	A/C	3U	79.57	TGCAGGTGGCACCATTGAGGTGATGGCGTAGGTGCGATTCTCGACGTTTGGGGAGAAAAAAGAA
TP26328	A/C	3U	80.94	TGCAGCTGGGTGGTGTCGAGGTCGTCAGCCTCCGAGGCGCCAACGTGAGCGGCTCGCTCGCAAG
TP5124	A/C	3U	80.94	TGCAGAGGTTAAGGAAATGGTACGGAATCATGGGTAGCTCGGGGATGGACCCGCGGTGACGGCG
TP25056	A/G	3U	80.98	TGCAGCTCTGCAAGCCATGAATTGCTGAGAGGAATCTTGCGTGCTCATCCATGGCTAATCCCAA
TP33055	C/T	3U	80.98	TGCAGGCTGCTCAGCTGGTGGTCGCCGTTCAGCACCGCCGCCAGCTGCACGATCTCCTGCTGGA
TP23285	A/C	3U	81.3	TGCAGCTAGCGATGTGTTCCCACTTCCCAAGGCCCTGAGGTCTGCTGGAACCTGCCGCCATTGG
TP7159	C/G	3U	81.3	TGCAGATGGTACCATGGGCGCGAGGGGTTGGTGACCTTGAGCCAGAGCCAGCAGCAGTGCAAGG
TP2823	C/G	3U	82.02	TGCAGACCAGAACAATTGTAGACTCATCATCAACACTCCAGGTCTGCTCACCAAGATCATGACG
TP4711	G/T	3U	82.02	TGCAGAGGAAGGATTTTTGGTCTCTCACAGTGATTACACTCATACAGATAGCCGAAAAAAAAAA
TP11708	C/T	3U	82.32	TGCAGCAGCGAGTATGCACATGATGGATCCAATAAGATCCATCGCACGTTCATGTGTGCATGTG
TP26423	A/G	3U	82.38	TGCAGCTGTAGAAAAAGTCCTTGTTTTTTCTTTTGTCGCGTCGGCATCACTTTTGCTGAAAAAA
TP24822	A/G	3U	82.74	TGCAGCTCGGTTGTGGCGGTGCAGGCGCGAGGCGACACGTGGTGGCGGCCAGGAGTGGCCGTGC
TP38711	A/G	3U	82.74	TGCAGTAATAACGAGGTAACCATCACTGAGGAGCCAGATGGCAGATAGTTAATCACCTTGCTTC
TP38713	C/T	3U	82.74	TGCAGTAATAATGACTTGACCATCACTGAGGAGCCAGATGGCAGATAGTTGATCACTTTGCTTC
TP14118	C/G	3U	83.89	TGCAGCCACCCGATGCCCTCCTCTGCCCCCGACGACGCCACCCTACCTCCTTCCTTTCCTTCCT
TP22240	A/T	3U	84.07	TGCAGCGTCTCCGCCAGCCTGGTCGACCCCGACGGCAGCACGCCCGAGAGCCCGTTGGACGACA
TP22291	C/T	3U	84.07	TGCAGCGTGACCAATCCTGGCCATCCTTTGCCATCTGGACAACCCCCGTTTGGAAATTACCGTA
TP29095	A/C	3U	84.07	TGCAGGAGAAGATCGACGTGGCAGCTTGGTATATCTGGTACGAACGACGGGAAGCGGTGAAGGG
TP41093	A/G	3U	84.07	TGCAGTCGAACGCCATGACGCGTGGCGCCGTCGCCTTGAAGGCGATGACCCGCGTCGTTATGGC
TP13339	G/T	3U	84.61	TGCAGCATGCCCTCGCGCTCCTCGAGGAACTGCTCCGAAAAAAAAAAAAAAAAAAAAAAAAAAA
TP11763	A/T	3U	86.48	TGCAGCAGCGCGGATCAACGTCGGTTCGGTTCATGGGACACGGACAAGAGCGAGCGTGCGCAAC
TP39184	C/T	3U	86.48	TGCAGTACTGCCGCTCCGTTTCCTCCCATCTGATCGATGTTTCTTGGCGTGCGCGCAGGCGCTG
TP4959	A/C	3U	86.48	TGCAGAGGCTGATCAGGACGAGGCACCAGTCCATGGTAGCCCAGGTCGCTGCCTTTACCCTGTG
TP17051	G/T	3U	86.84	TGCAGCCGCGTGAGTTTCCCACCTCGCCCGTGGAATGTGTGGTGGCTAAAGGGAAAAACGATCT
TP25059	C/T	3U	87.63	TGCAGCTCTGCATGGTCGGGACGGGCACCGAGCGCGGAGAGGACGGCTCCCTCAAGCACTACCC
TP9615	G/A	3U	87.99	TGCAGCACAAGACGTGCTAAGAGTTTGCATCTGGATTGCACCCAGCAGTGCCGAAAAAAAAAAA
TP26781	A/C	3U	88.23	TGCAGCTTCACCTCAGAGGAGGAGGTGCCATTGGGAGGGGCGGCATTGGTGGCAGGACCAGGAG
TP4278	A/G	3U	88.56	TGCAGAGCAAGGGATCACCTGGTGCCAATGCTGAGGCGAATAAGCCGCTCTCAAGGAACAATTC
TP4405	C/T	3U	88.56	TGCAGAGCCACACGAATCCCGCGTGAGCGTCAGCAACCGTGGATCAACGCAATGTGCAAGAAAT
TP6418	C/T	3U	88.56	TGCAGATCGCCGCCGACATCGTGGGACGAAGATACCGATGACGAGGACGTTCCCTCCGAAAAAA
TP23351	C/G	3U	88.9	TGCAGCTAGGGCATTGAGGGTTTGCTGGGACATGCCTCCCTGCTAGTGTTCCTAGGCACGGCAG
TP30928	C/G	3U	88.9	TGCAGGCAGCCGTTCTCACCTCACAAACCCTCCTCCCGTTCTCATGTCGTGCAGAAAAGAAAGT
TP2663	C/T	3U	89.51	TGCAGACAGCCGAAGCTTCTCGCCTTCCGCCTGTTCGGCAGTGAAGATAACAAAGAGTTTGCAT
TP21805	C/T	3U	90.58	TGCAGCGGTGACTCGTTGAGACTATGAAGGGGCACGTGCAAGGGCCCAGAGGATGTCACGGCGG
TP42286	A/G	3U	90.74	TGCAGTGATGGGGTATATATAGGCAACTCATTTGTCCCGATTCGTGTCTGAAACCGAAAAAAAA
TP13594	C/G	3U	91.12	TGCAGCATTGCAGCATCACGTGCATGTGTAGGTACGTGCTAAGCACTACTAGTGAAGTACGTAT
TP13746	C/G	3U	91.12	TGCAGCCAACAAATAGGTTCGAATCTGCTCCAAGAAACTTTCTTTCTGCGTGGTTTGGTTCCGT
TP148	G/T	3U	91.12	TGCAGAAAACAGCAGAGAAAGAACGTTGGGGCGGCGGCAGCTTGCCTCGCCGAAAAAAAAAAAA
TP1529	C/T	3U	91.12	TGCAGAAGATGGTCCAAGGTCTGCTTGTTATTTTTCTTCAGTTCCACAATTAGCAGTATTTGTC
TP15623	C/T	3U	91.12	TGCAGCCCCCGAGTGCGGCGTAGCCCCCGAGCGTACTTCGACAACGGACATGCCGAAAAAAAAA
TP26124	C/T	3U	91.12	TGCAGCTGGCGGACGTGCTGCACGCCCGTGGACTCCGCATCACCGTCTTCCACGCCGCCTTCAA
TP41821	C/T	3U	91.12	TGCAGTCTTCATCTAACCTGTAGCCGAAATCTGGCACATCTGATCGATTGCTCAAAACGATTGC
TP6830	A/G	3U	91.12	TGCAGATGATCAAGGACGACGCTAGGTCCTGGGCCATCACCGAAAAAAAAAAAAAAAAAAAAAA
TP7276	C/G	3U	91.92	TGCAGATGTCGTCGTCACCACTGCCAAAGCATTGAGCTTTCGCTCGGCAGCTCACCCATGCCAC
TP9267	A/G	3U	91.92	TGCAGCAAGTATTTCCTTAATCTCATTAGAGAAACAAAATTACAAGTAAAAAATTTACAAGTTC
TP37542	A/G	3U	92.07	TGCAGGTGGGATTTTACAGCACTACCTGCCCCAACGCCGAGGCCATCGTCCGAAAAAAAAAAAA
TP21027	A/G	3U	94.22	TGCAGCGGCATCTGATCGACGGTCGGTTCATGGGGCCGCGTGTTATTGGGCGGCCGAAAAAAAA
TP24748	C/G	3U	94.22	TGCAGCTCGGCGTCGCGGATGGCGACGGCCTTGGCGGCCTCCACCTCGGCGACCTTGGCCTGCC
TP25607	A/G	3U	94.22	TGCAGCTGCCTCAGCTTACCAACCGAATCAGGCAGGAATGTGATGTGGATGCACCTTCGTAGCG
TP2933	A/G	3U	94.22	TGCAGACCCGACTCGACGAGTACTTTCCGTCGAGACGACTTCGTAGGCAGCCGCCGCTAGCGAC
TP32018	C/T	3U	94.22	TGCAGGCGAGCGGCGTTGCCTTCCCTAGTTACTGAAGGAAGCGTTCTCCGAAAAAAAAAAAAAA
TP34859	A/G	3U	94.22	TGCAGGGGCTAGCATCCCACAAGGGGATCGGTGAGCAGGTGTCGCACACCGAAAAAAAAAAAAA
TP45243	A/C	3U	94.22	TGCAGTTGGAGTCCCACTATCCTCACTTATTTTTTGAGATTTAAAAGAACGAAAAAAGAGTAAG
TP15970	A/C	3U	94.58	TGCAGCCCGATGCGATCTCCATGATGCCGACGTGAAGCCCGAAAAAAAAAAAAAAAAAAAAAAA
TP25102	G/T	3U	94.58	TGCAGCTCTGGTGGAGGGCCCGAAGCTCGCAAATACAGTTGGCTGTAAGTCAATCCGAAAAAAA
TP336	C/T	3U	94.58	TGCAGAAACAAAAGCGCCTCTGATGCCTCGTCATCTCCGCCACACGAGCTTGGCGCCATGCAGA
TP37586	G/T	3U	94.58	TGCAGGTGGGTGGACATGTAGAGATAAGATGTGCAACTGAACATGGAGAAAGAAGGTTTCAGCC
TP41822	A/G	3U	94.58	TGCAGTCTTCATGGGCGCGCGCCTGGTCGCTGCCATCTTGAGCCTTGTTGTAGCGCGTACTACG
TP4420	C/G	3U	94.58	TGCAGAGCCATCCACTCCATCGGTCTCCTTCTCCACATCGCAAGTTTCACCGAAAAAAAAAAAA
TP7785	A/G	3U	95.44	TGCAGATTTAGAGCCTGTTCGGTTTCTCTCCGCTCCCCTGACTCAACTCCCGAAAAAAAAAAAA
TP13128	C/T	3U	96.18	TGCAGCATCGTACGACACTAGTAGATTGACGAGTGTAAACTTGGGAGCAAGGCACTGACAGGTG
TP24486	A/G	3U	96.62	TGCAGCTCGAACCGCGCTGGGGCGGAGCTGTCATCACCACCGCTGTCCGAAAAAAAAAAAAAAA
TP3469	C/T	3U	96.62	TGCAGACGTCCATTGAGTGGGCCGACCACACCGAAATCTTGTGCTTGTGCATGCAAGCATAGTT
TP21569	A/G	3U	97.36	TGCAGCGGGCGGCGAGCAATGCATACTCATGGTGGTGGGCGAGCCACATCCGCACCAAGCAGTC
TP16874	C/T	3U	97.7	TGCAGCCGCCTCCCCGCGATGCCCTGACACGGCACGTTGCGGGGGCGTCCCTCGTGAACCGTTG
TP19083	A/G	3U	97.7	TGCAGCGAGCTGTCAACCAAGGGCTATGTCGAGTTGTCTGACTACCATGCCGAAAAAAAAAAAA
TP19731	A/G	3U	97.7	TGCAGCGCCAGACCCACGCGCACGTCATAGTGACCACGGCCGAGCGCCCGTGCTGCCATATGGA
TP35675	C/G	3U	97.7	TGCAGGGTTAGATGCGTGATCAAACACTTCGGCTATCCCCGCCAAAGCTTCTCCCATGTTGTTC
TP37436	C/T	3U	97.7	TGCAGGTGGATGCTGCTTGGCGGTAGATAAGGCGCGGCGCTCCTGCATCGTCTCATACATCCCG
TP39602	A/C	3U	97.7	TGCAGTAGTAGCAAGTATACATGCCAAGGTAGCAACCGCAAGAGTAGAAAAAAGAACATGAGAC
TP4258	A/G	3U	97.7	TGCAGAGCAACACGTGCAAGCAGCGGGCCGTCAGAAAGGAAAAAAAATCCCGTGCGTACCGAAA
TP43674	A/C	3U	97.7	TGCAGTGTCTAACGGATTTGAAGAAAAGGATACCATATGAACCCCCGAAAAAAAAAAAAAAAAA
TP965	C/G	3U	97.7	TGCAGAACAGGGAAGAGAGATTCCAAATCTAAACCACAAGGAGAGAGGAAGAAGATGAGCTTTC
TP13666	C/T	3U	98	TGCAGCATTTTCTTTTCCTTTTTTTCCGTTCTATTATGTGCTAGCTCGATTGCCACATAGTTTT
TP4492	C/G	3U	98	TGCAGAGCCTTGTCCACCTCCCCAGCCGCACAGTGCCCTTGGATCAACATGGTCCAGGTCTTCA
TP28127	A/G	3U	98.03	TGCAGGAACTGGTGTATGCAGTCATGCGTATCTTGACACAAGACTTTTAGCCACCGAAAAAAAA
TP16819	C/T	3U	98.34	TGCAGCCGCCGCCATCGGCGACCGCGGACCTGGGCATCCCGACGACGGGCCCGAAAAAAAAAAA
TP31006	T/A	3U	98.34	TGCAGGCAGGTGGCTTCAAAGGTACCCAAAGTTCCCCGAAAAAAAAAAAAAAAAAAAAAAAAAA
TP988	C/T	3U	98.76	TGCAGAACATCTACCTTTACAAGAACGCGCTGTCGGGCTCCATCCCGAAAAAAAAAAAAAAAAA
TP7226	A/G	3U	98.77	TGCAGATGTACGCATCGGTGTACAACAAGGGGACTTGGACACACATACTCTTGTCGCTGGTGCA
TP717	A/G	3U	99.27	TGCAGAAATCTTCAAAAGACATGCATCTGAGCGTATTGGAACACATTAATAAGATTACCGATGT
TP22571	A/G	3U	99.48	TGCAGCGTGTGGCATCGGTCGTGGGACACTTGGATGTCAGAATCCGAAAAAAAAAAAAAAAAAA
TP32150	A/C	3U	99.48	TGCAGGCGCCATTCAGAGAAATCGAGCTTACTCGCTTAGTCGCTTGCTTGGGAGATGAATCAAT
TP32756	G/T	3U	99.48	TGCAGGCTATAAAGATAGAATCCTATGGAGGCACCACCTTTCCAACATGGATGGCTATCTTGCT
TP33490	A/G	3U	99.48	TGCAGGGACACGAATGGTAACTCTGATCAACTAACTAACTAACGACGGCTCATCATCAGCTGGC
TP38682	A/G	3U	99.48	TGCAGTAAGCATATGTCCATACTCCTACATACTCCCTCCTTTAAGAAATATAAAAGCGTTTAGA
TP44869	C/G	3U	99.48	TGCAGTTCTTGTTGTATTGTATTACAAGGTAATGCTTCCTGTCGTTTCTTAGTCCGCTCCGCTG
TP4546	C/G	3U	99.48	TGCAGAGCGCTACGGAGCACAGCTGGGTCATCGCAGCAAGGATGCAGCTGGTTGAGGAAGGGTC
TP9427	A/G	3U	99.48	TGCAGCAATCTGAGTACAAAACATTTTCTGGTTGAGACGACCGAAAAAAAAAAAAAAAAAAAAA
TP16472	C/T	3U	99.84	TGCAGCCGACGGAGCTCGCTAGCCATGTCAGCTCCCGCTGCCCTGCTCTCGAGGACTTGAAACT
TP23280	A/C	3U	99.84	TGCAGCTAGCCTGACGTACGAATCGTACGTACGTCCATTCGGTCGAGCTTCTAGGATCCACCGT
TP25821	A/G	3U	99.84	TGCAGCTGCTCGAGCGCAGTCACCACCTCCGCCATGCCGAAAAAAAAAAAAAAAAAAAAAAAAA
TP27033	C/G	3U	99.84	TGCAGCTTCTCCGATCCGAGACGCCGCCCTCTTGAAGAACGCCTGCACCAGTACATATGTATAC
TP2925	C/T	3U	99.84	TGCAGACCCCTCACTCCATCAACCTCGTTTGGGATACTCCTACACCGAAAAAAAAAAAAAAAAA
TP31070	C/G	3U	99.84	TGCAGGCATCTGTTACTACTGTTTCTGCAAACCAACACCTGAAGCCGCAAGGATTGGAACCGAA
TP31073	C/G	3U	99.84	TGCAGGCATCTTTGACGGCGCCATCGATGCCGTTGGTCTCGCGCCATGGCCTTGTTGCTGTGTG
TP36615	C/T	3U	99.84	TGCAGGTCGACATGCTGTCGATGAGGGTGCGCTTTGCCCTGTGTGTGTCAGTCTTTGGGAGTGG
TP397	C/T	3U	99.84	TGCAGAAACATGTTTCATCCATTTGCATGCATCCTTCAAGTCCACATTCTCTCCTGATGTCAGT
TP44088	A/G	3U	99.84	TGCAGTTAGCTTAAATGTTAATTCAATAATATAACAGAATTTTCAAATATAATGGTATTTACAT
TP46128	A/C	3U	99.84	TGCAGTTTTGGACGCCACGGATCCGATCTTAACCCATAGCGAGAGACGCGTCGCTACCGTTGCC
TP5964	A/T	3U	99.84	TGCAGATCAAGAGGAACGGCAGCTGGCTTCCAGTCAAGCCCGTCCCGAAAAAAAAAAAAAAAAA
TP7698	A/G	3U	99.84	TGCAGATTGCTTCTTCGACCTTCAGACGTCTTCCTCCACCCACCAAACGTGCCACCGAAAAAAA
TP11874	C/G	3U	100.2	TGCAGCAGCTACATGGACCGTTTCTAGAATAACAACTTTGATTGCAAAACATTGGATACCAGAA
TP22243	C/T	3U	100.2	TGCAGCGTCTCCTTGGTCTTGAAGAAGCACGGGACGTGCACCACCTTGTACTGCCCCGTGGCGT
TP28544	A/C	3U	100.2	TGCAGGACACAAGGAAGAGATAATCAGTTTTGTTTGTGTTATTGCTGCTTATGGAGAAAATAGA
TP30696	A/G	3U	100.2	TGCAGGCAAGGCGATGAGTTAAGGGAGTCACGGCGCCGCCGATCGCCTCATTAGCGGCCGAAAA
TP35490	C/T	3U	100.2	TGCAGGGTCTCCTTGGTCTTGAAGAAGCACGGGACATGCACCACCTTGTACTGCCCCGTACCGT
TP3743	A/C	3U	100.2	TGCAGACTTAGTCTCAATCGACTGATGCTTAGATGGACCCCAACAGAAAATGTCGATGATGTAG
TP37755	A/G	3U	100.2	TGCAGGTGTTCACGATGGGGGAGGCGTCGTGGAGGAAGGTTCCAGCGCCTAACATGAAATGCAG
TP43210	A/G	3U	100.2	TGCAGTGGCCAAACTAAAAAAAGGTACTGGACAAACCTTGTTGCATTCACAACAATGAGGAGTT
TP4194	C/G	3U	100.48	TGCAGAGATGACACGTGGGAGAGATGCAACCTTTTGAGCCGAAAAAAAAAAAAAAAAAAAAAAA
TP12635	A/G	3U	102.07	TGCAGCAGTCTCAATCCCGAACAACGACGTCCTCCTTGAGATCCTCGTCCGCGTGAAGGACGCC
TP24221	C/G	3U	103.15	TGCAGCTCCGACCATCTCGAGACGGAAGAAAAGCCGCCGCACATGGTGCCGAAAAAAAAAAAAA
TP41890	A/T	3U	103.15	TGCAGTCTTGGAGAGGCAACAGACATGAAGTGGATTGGGTGGAGGCGAGGAGAAGCGGAGGAGG
TP42950	A/C	3U	103.51	TGCAGTGCTGCTGAACTTGTGTATAAAAAAGAGTGGTGGTTGTAGTTGATCAGGGTTAACAATT
TP1078	A/G	3U	105.02	TGCAGAACCGCAAATCATGCAAAATGTTCAAACACATGACAGTACTGCTGGAGGAGGTGAGGAG
TP39141	C/T	3U	105.02	TGCAGTACTCCATGTTCGGCAGCGGGTTCACGGACAGCTTCGACCCCAGGCTGCTCTTCGCGGA
TP25264	A/G	3U	105.81	TGCAGCTGAGAGTTCAACTTGTGGCTGTCTGAGGCGGAGGGATGGATGGTGATCAATCGAGCGG
TP45085	A/C	3U	106.17	TGCAGTTGCAGTTGGCCAAAAAACTCATTATTACATTACACATTATTATCTTGGACAAATAAAT
TP11973	C/T	3U	107.32	TGCAGCAGCTGCCCCTGCTGTGGCAATGGCCTCTTGGCCGCCAGCTGCTCGAGCACCGCGGCGG
TP1849	A/G	3U	108.04	TGCAGAAGGTAAGGGTGCAGTAGGGGGCAATGGCTGGGCCGAAAAAAAAAAAAAAAAAAAAAAA
TP11644	G/C	3U	110.28	TGCAGCAGCCTCGAATCAAAGAAAGATGGAGGGGACCGCAACCAAGGCAATCCCGAAAAAAAAA
TP39118	C/G	3U	110.28	TGCAGTACTAGATATTTGATTAACTGCAATGAGATGTTGGAGTGAAGCAAACAAGCCAAGTGTT
TP42967	C/G	3U	110.28	TGCAGTGCTGTGTTGGAGCTACAGCCGACGACATGTTGGATCTGCGCCGAAAAAAAAAAAAAAA
TP4664	A/C	3U	110.28	TGCAGAGCTTCCTGTTCCCGACAAAGCCCAAGAAGCCGTCGCTGTTCGCGCGCGTCACGCCGAA
TP5239	C/G	3U	110.28	TGCAGAGTCAGTACTTGGGACAGGGTTAACACGAGTTGTGAGCAAGCAGCCTTCACGTGCGTAC
TP6147	A/G	3U	110.28	TGCAGATCCACCAGTTATTTGTCGGCAACGGGACGGGGAGACATAAATCAAAGTTGTAGAGGAC
TP41368	A/C	3U	110.64	TGCAGTCGGCTGTTTGGAAAGAGAGCTAATCCTTGGCAAGGTCGTAGAGCAGGTGGATGTTCTG
TP14975	C/T	4U	0	TGCAGCCATGGGTCGGACGCGTCGGGCACATGTGTGGGTGCGCGTTGGGCCTGTTGGGCCCGCG
TP18988	A/C	4U	0	TGCAGCGAGACTCGGATTTGGCTGCCCGCGGCACAGAACATGGAAACAAATAAGGGGAAAGTGA
TP33580	A/G	4U	0	TGCAGGGACGGCAGATCCCCATTGGCAGGGTCACGTCAGGGGCCGAGTAGATGTACTTGGTTAC
TP40450	C/T	4U	0	TGCAGTCCAAGACTGTTCTCACCGACGTCTTCCTTGGAAAGAAGCCCCCAAGTCACTACTGAGA
TP44919	C/G	4U	0	TGCAGTTGACCACGGCTCCACGACAGTCCAGTCGTGTCTGCACTGTGTTCCACCTCCCCAAGCA
TP43630	C/G	4U	0.36	TGCAGTGTCCAGTCGCTCTAGTCGGCAATGCGTTGGTCCTGCCGCGAGGTTCCGAAAAAAAAAA
TP42514	C/G	4U	3.16	TGCAGTGCAGTAGGAGTATCAATTACGCCGCTATGCTAGCCCATGTGTGCTATCGCTGCTGATT
TP38400	A/C	4U	3.49	TGCAGGTTTGCTTCTGGTTTGTGGAATTATGGAAAAGGGGGCGTGTCCACGGACATATACAGGT
TP43549	A/G	4U	3.49	TGCAGTGTAGCGAGGTGGGCATGTGAATCTGATACAGAAGGATAGAAACGAACCGAAAAAAAAA
TP14166	C/G	4U	3.83	TGCAGCCACCTATCCATCCAGAAAGTTGCGATACCACCGCCGCCCACCTGTATCGTTGAGCAGC
TP38370	C/T	4U	3.83	TGCAGGTTTCGTCAGCGAGGCTGTGGATTCGTTTTCCCTCCGTCTGCTACTCTGGCGGTTTGCG
TP670	A/G	4U	3.83	TGCAGAAATATCAGACATCTAACCGTACGACCCAGAAGACCAGAACACGTGCGTGTTTTCAACT
TP5008	A/G	4U	4.84	TGCAGAGGGCAGCGCTGACGCAACCAACTAGGGCGACCGACAGAGCCAACCGCAATGCCGAAAA
TP22238	C/G	4U	6.18	TGCAGCGTCTCCAGCAGCGGCAGCGCGGCGACGAAGTCAGGGACCGAAAAAAAAAAAAAAAAAA
TP8685	C/G	4U	7.19	TGCAGCAACGGACGGCTGCCTTCATGAGGGGCGCAGCGGGATGAAGATCTTGTGCATGGATCTC
TP39780	A/G	4U	7.69	TGCAGTATATGTGTGTGGTTGAGAGCAGCAGCGGCAACACAACAGCAGCAAGCAGCAGCACAGC
TP3012	C/T	4U	7.86	TGCAGACCGCCGCCAGCGGCCGCTCTCCTTTACACCAGCCCCACCCACCAGCGCCACCGCACCG
TP38670	C/T	4U	8.19	TGCAGTAAGACATGACACGGGTTAATCACCACTAGCTTAACGATAAGGCAGGATGCATCATGGC
TP5738	C/T	4U	8.19	TGCAGATACTCTTCCAGGGACGTGTTTGCCGTGATGAAGTCGTTGCTGCTCACCGAGGCGGAGT
TP5999	C/G	4U	8.19	TGCAGATCACCAGTACAATGACAGACAGGATTTGGAATTGTCGGGGAGGAGGAAGAGGAGGCGT
TP6316	C/T	4U	8.19	TGCAGATCCTATGTGGGAATCAGATATAGTTAAGCAACCCGCATCCAGGCCACGACGCACTCTA
TP1273	C/G	4U	9.34	TGCAGAACTCGTCCAGGAGCTCCTGGGCCGCGCGCGTGTACTTGGAGTTGCGCAGCACGCCGAA
TP2234	C/T	4U	9.67	TGCAGAATGCGGCAGATGGGAAGTCCTGTGAGGAGCTTCTATGCAGCGCCCTCAGCACCGTGAA
TP32863	A/C	4U	9.67	TGCAGGCTCGAGCCAATATGATTCGGCCTGTGAAGCCGAAAAAAAAAAAAAAAAAAAAAAAAAA
TP3440	G/T	4U	9.67	TGCAGACGGTAGCTATTCTACCATGGGGCAGGATTCAGAGACGGGTGCTAACGGCTGGCTCGAG
TP36020	A/G	4U	9.67	TGCAGGTACGTGCGTCTAAAAAAACATGCGTGTACACTACTGTCTGGCTATGGCTTCACGAAGG
TP40984	A/T	4U	9.67	TGCAGTCCTCAGCACAAGTGACTCCCTCACACTAGCTATCTTCCTAGCACGTCTCTCAAAAATA
TP24658	C/G	4U	10.35	TGCAGCTCGCGGCACACGCGGAGGAGCTCGAGCGCCGTGGCGGCGCGGGGCGGCGCCGTGGTGC
TP28234	C/T	4U	10.35	TGCAGGAAGCCATCGGGAAGCCACGCCAATGGGTCGTCGTCGCCGCCGAAAAAAAAAAAAAAAA
TP4651	A/G	4U	10.35	TGCAGAGCTGGCTGGATCAAGCACGGGGACGAGCTCGGTTTGGAGTTTGTGCCCGTCACGCGGC
TP18475	A/C	4U	10.68	TGCAGCCTTTAGCTGGCCCAAACATCTTGACCCCTACGACCCGAAAAAAAAAAAAAAAAAAAAA
TP25359	C/G	4U	10.68	TGCAGCTGCAAACAGGGTGGCAGCGCAGCGCAGCGCAGGGTTGTACGTACCGCCTGCCCTGCCG
TP2991	A/G	4U	10.68	TGCAGACCGATACAACCCCGCATTGGATGACACAATACGTTCGGACTGCTCGATTTGAATGGTT
TP9598	C/T	4U	10.68	TGCAGCACAACCCTTGTTGCAAAGATGAAGACAGTGCTAGATACTGGATGGATATAGATCAACG
TP12602	A/G	4U	11.35	TGCAGCAGTCGCCCCAGCTCCTGCTCACTGAAGCTGGCCTTCCGCCATCACCGCCTTCGCCTCA
TP39858	A/T	4U	11.35	TGCAGTATGACTTTAGTACGGATGTACAAGGACCAGAATGAAGCTTTCATAATTTGTAATCGGG
TP26623	A/C	4U	15.25	TGCAGCTGTTTCTGCTGCTGCTCTCCTTGGCCTCTACTGCCAGCTCATGCACCGAGCAGGAGGA
TP24437	G/T	4U	15.59	TGCAGCTCCTGGAGCGGAGGGAGCGACAACACAATTGCAGGGAGCTGCTCGAACCGAGCTTCTC
TP41057	G/T	4U	15.59	TGCAGTCCTGTGCGGGCTCGAGATGGGTTGCTGGCATGCCTACCGATGCGTTGACCAGGGCTCT
TP44029	C/T	4U	43.11	TGCAGTTACCGCCGTGAGATGAGCCGTCAAGCGCCGCCTCACTCCGCCAACCACGTCCGCTGGT
TP43303	C/T	4U	44.26	TGCAGTGGCTCCGAGCGGCGCCTGAGGATGATGTGCAGCCACGGCGGCTGCTTCGCGCCCTGCG
TP16998	G/T	4U	45.74	TGCAGCCGCGCTTGAATGCGATCGACGCGACCAGTTCGCTCTTAATTAGGGGGTGTCACGGGCT
TP2151	C/T	4U	45.74	TGCAGAATCTAGCCACACCACAGGAAGGCTTTCGAAAGCCTTCCTCCACTCGACTTGGGAAAGC
TP23887	A/C	4U	45.74	TGCAGCTCATTCATCACGGCTACAGCAGCTGCGACGTCAAGCCCCTCATCATCATCGTCGTCGG
TP25250	A/C	4U	45.74	TGCAGCTGACTCGTCGCTACATAGCCATAGCTTCTGCCCGACGAGAAATTAATTAGGGCAGGCC
TP3443	A/G	4U	45.74	TGCAGACGGTGACAGGCAGCAGCCGCCGACGTCGTCTTCCGAAAAAAAAAAAAAAAAAAAAAAA
TP5758	A/G	4U	45.74	TGCAGATAGATAGATTGATGTACGATGACATCGTGGCCGAAAAAAAAAAAAAAAAAAAAAAAAA
TP3218	C/T	4U	48.23	TGCAGACGATGGAGACCTCACGGACATGGGGAGTCGTCGCCCAGGCATCGTCGTACCGTCGAAC
TP37616	C/T	4U	48.23	TGCAGGTGGTGGAGGTGAGCTCTCTGTGACGAGGAGCTCCGAAAAAAAAAAAAAAAAAAAAAAA
TP42321	C/G	4U	48.23	TGCAGTGATTTACTACCTACTTGCAGCGAGAACAACGCCAGAGCATGATGCCTTGCCATCCGAA
TP44264	C/G	4U	48.23	TGCAGTTCACTTTACACACGGTCAATGCACGATTCGCTTCGTCGCTTGCGAGTTCTGATACTTC
TP37332	A/G	4U	49.71	TGCAGGTGCTGCGCGAGAGAAGACGACGGATGTTGCACGAGGAAGAAGAAGATTTGGAGGCGAA
TP40735	G/T	4U	51.94	TGCAGTCCATTCCGACAACATCCACACCTCAACCATCATTGACGGCTTGGTTCTACTTCCACCG
TP1083	A/G	4U	53.2	TGCAGAACCGTCGAACACCCTCGTGGTGCAACCGCTGACAAAAAAAGCTTCAAACCCTTCCTGG
TP11289	C/G	4U	53.2	TGCAGCAGCAGCAGCAGCAGGGTCGTGGTCGTCGGGGAGCGGGATGCGGAACAGCTCCAGGAAC
TP31250	C/T	4U	53.2	TGCAGGCCACCTTCAGCTGCTGCACGAGGCCGTCCACCTTGTCGAAGTCCACCTCTGGCTCGAT
TP16750	C/G	4U	53.38	TGCAGCCGCCATAATTCGGGCTACGTATAAGCCAAAGAAGGAAGAAAACCTAGTGTATATACGT
TP2091	G/A	4U	53.38	TGCAGAATCCAAAATAAAGACGATCCCTATAAGAAATATAGGAAAGATCAGTTATACCATCGAC
TP29371	G/T	4U	53.38	TGCAGGAGCACGACAGAGCAGCAGAAGCAACCCACGTTACCCCTGCAACCATAATACACAAGGT
TP6597	C/G	4U	53.38	TGCAGATCTGCAACAGACACTCCAAATTAATGTGGTATTCACACTGATGAAATTTGGGCGACCA
TP6790	A/G	4U	53.38	TGCAGATGAGCCATTGATCCTTTCATTGATCTCATAGAGGAACTCTCAATGAAAGCACTAGTGT
TP16175	C/G	4U	53.56	TGCAGCCCTAGTAGAACGTCTAAAACTTGCTAATTCTGTTGGCTGCCACTCCATTCTGGTACAG
TP18223	C/G	4U	53.56	TGCAGCCTGGTTTGCTCGGCGCCGTACCTTGACGAAGCGCCGAAAAAAAAAAAAAAAAAAAAAA
TP21401	A/G	4U	53.56	TGCAGCGGCTCTCTTCCCCGATTGCTGAGGCGGCGGAGACGGCTGACGTGGCTAAGTTGGAGCA
TP22072	C/T	4U	53.56	TGCAGCGTCATGGCGGCCTTGAAATCACGCACTAAGTCTTCGTCCTCGTCCGCCTCCGCGAAAA
TP26468	A/G	4U	53.56	TGCAGCTGTCCTTCGGAGGCTCGAGGTCTAACCCTCAAACTATCTCCGAAAAAAAAAAAAAAAA
TP28337	A/G	4U	53.56	TGCAGGAAGTCACCGACGTTCACCACCAGCGCTCCCTCCACCGCCGAAAAAAAAAAAAAAAAAA
TP28428	C/T	4U	53.56	TGCAGGAATGATATGATCTTTAACAGACAAAATATTTTAAACTTCTTGTGGGATTCGTACGTGG
TP31736	C/T	4U	53.56	TGCAGGCCGTCCCATACGACCCTGTGGCCACCCCCAGACGCGGGGTGGAGCGCCTGTTCTAGAG
TP32325	C/G	4U	53.56	TGCAGGCGGAAGGCCACGGGCATGGTGTGCATGGCGTTGCGCAGCGTGAGCTCCCCCCTGGCCG
TP36603	G/T	4U	53.56	TGCAGGTCGAAGGAGACGAAGCCGAGGTGCGCGTCCGAAAAAAAAAAAAAAAAAAAAAAAAAAA
TP43212	C/T	4U	53.56	TGCAGTGGCCAACCAACCGAGGATCGTTCTGCTAGAGCCACGTCCATTTTTTCATATAAAGAGC
TP4430	C/G	4U	53.56	TGCAGAGCCCAAGCCCCGCGACCAGATTCTCAGGCCCACCCGAAAAAAAAAAAAAAAAAAAAAA
TP5179	A/G	4U	53.56	TGCAGAGTAGATAAAAAAACAAGTGGGTTATTCATGTGGAATGCCAGTAATTTCAGTGAACTGA
TP7635	A/T	4U	53.56	TGCAGATTCTGTGGCAATGAGAACAACCCATCCAAGCAGCCACATATACCTGGCTCCCCCTCTG
TP7796	C/T	4U	53.56	TGCAGATTTATGTAGGAGGGGTGGCGGCCTGCACTGTGTTAGTTTATACTAATGCGTCGAACTT
TP8830	A/G	4U	53.56	TGCAGCAAGACATCCTATCCCTGATCACAGACTTTCGCTCGACAGCCGAAAAAAAAAAAAAAAA
TP11962	A/G	4U	53.87	TGCAGCAGCTGAGTTTGTGCTCAGGAAAAGGAAATACAAAAGGCCGTTCATGCGGCCGAAAAAA
TP13583	A/G	4U	53.87	TGCAGCATTCTTCTTCGGCTGCCTAGAAGCATCTTCCGCTTTCTTCTTCTTTTGGACCGTCGTC
TP19508	C/G	4U	53.87	TGCAGCGCAGAGCTGCCGTCGAGGCCCTTGGCCCTGTTGTGCCGAAAAAAAAAAAAAAAAAAAA
TP22263	C/G	4U	53.87	TGCAGCGTCTGCGCGTACAGCTCGTTTTTGGTCTCGTCGACGAGGCCCACCAGCAGCGGGCCCT
TP3357	A/G	4U	53.87	TGCAGACGGAGCACCATGCGGCTGCCATGCACAACGCCTATGCCACAGCGGACCCCTACTGGCA
TP8756	C/G	4U	53.87	TGCAGCAACTCGCGAGTCCTCCGTGTCCCTATCCTGCTACCGCCTACCGAAAAAAAAAAAAAAA
TP8945	A/T	4U	53.87	TGCAGCAAGCAGGCACCAGTGGTCTAGTGGTAGAATAGTACCCTGCCACGGTACAGACCCGAAA
TP11172	A/G	4U	53.9	TGCAGCAGCAAGAGGCAAAAGAAGAGCTGCTCTTGCCTCCCCAGCTACAGGTGTTGTATATCAC
TP23311	A/C	4U	53.9	TGCAGCTAGCTTTCCAGATACAGATCAGGGAGCAGTTGCAACTGTCTGTCGCCTGAATGAGAGA
TP23501	A/T	4U	53.9	TGCAGCTATGAGCAGAAAGGAACCCTGCAACATCATCTGTCCTCAGATCAAGCAACTGATGTGC
TP28332	A/G	4U	53.9	TGCAGGAAGTACGGCGCCCCACCGATGGCCTCGGTGTAACCGAGGCTCAACCGAAAAAAAAAAA
TP33832	A/T	4U	53.9	TGCAGGGATGCACTACGGCTTTGTACTCGGCCCACCGAAAAAAAAAAAAAAAAAAAAAAAAAAA
TP36316	C/T	4U	53.9	TGCAGGTCACACACACATCCATTTCTGAACTGCATTGTTACTGTGCTGCAACAAGGATGTATCA
TP38697	A/T	4U	53.9	TGCAGTAAGTAAAGCAAGCTCCGATCAATCTATAAATGCCGAAAAAAAAAAAAAAAAAAAAAAA
TP4381	A/G	4U	53.9	TGCAGAGCATCGCCCTCCGCTGGGGCAAGGTCATCGACTCCCTCACCTTCACCTACACCGACAA
TP1910	C/T	4U	54.23	TGCAGAAGTCGATGTAGCGGTTCAAAAGTGTGTTCATCTCCTCCTCCTCATCCTTCCGAAAAAA
TP21842	C/G	4U	54.23	TGCAGCGGTGGACTCCGCCCGCCCGCCGCTCCTTCCTCTTATTCTTCTCCGCCGAAAAAAAAAA
TP24576	C/G	4U	54.23	TGCAGCTCGATGGAGCCTTGGACAGGCGTCCCATTCCTTCCTATGCAAGCTGCTGAACCTTTGC
TP34599	A/T	4U	54.23	TGCAGGGCTTGAGGAGACGCATCGAGGGGTAGTTCACGCGGCTGCATGCTATGATCGGCGAGCG
TP17226	C/T	4U	55.38	TGCAGCCGTCCTGCGCCGCCTCGCCGTCGCCCCTCCGAAAAAAAAAAAAAAAAAAAAAAAAAAA
TP12807	A/G	4U	56.96	TGCAGCATACACGATAATAAAAGAGTTTATTATTCAAATTAATGAAAGACAAATACATGCACAC
TP34374	A/T	4U	56.96	TGCAGGGCGCTCACCTGATTTAGGGAAGGTGTCGTGGCTGTTCGGTGAAGCGGGCAGATGAAGC
TP34574	A/T	4U	56.96	TGCAGGGCTTACTGCTACCAGCGAGGCTACGACCTGCTGAAAAGCTATTGCAAGCCGAAAAAAA
TP18845	C/G	4U	56.99	TGCAGCGACGGCACCGAGTACGCACGCAACCAACTCACTGCATCCATGCATATCTCTCGCTGCT
TP23039	C/T	4U	56.99	TGCAGCTACATGTGTTTTCAATTGCTTGCTCCGCTGCCCCTTTTGCCTGCTACGAGCACTAGTA
TP30713	G/A	4U	56.99	TGCAGGCAAGTTGTTGGGGGTAGGGACAAGGAGTAGAGAAACAACCGAAAAAAAAAAAAAAAAA
TP35390	C/G	4U	56.99	TGCAGGGTCACGGTCTAGTCGGTGACGCGCTCGCCGACCTCGGAGAGATCGGTGGCAAGGGTCC
TP4373	C/T	4U	56.99	TGCAGAGCATAATTGGTTTGCTACCAACATTTGGCAAAATCAGAAGTTCCCAACATTCGGCAAC
TP5205	C/T	4U	56.99	TGCAGAGTATGAATTATTATTTTTCAACAAATGGAAACTCGATTATGTGTTTCAACCCGAAAAA
TP5581	C/T	4U	56.99	TGCAGATAACCCAGACAGATCAGCTGAGGAATGTAATCCCACACAGGAAAATATGTCGTTTTTC
TP10141	T/C	4U	57.32	TGCAGCACCGCGGCTGCCCCGCGCTCGCCTCGTTCGTTACCGCTGGACCAAGCCTGCTCCGAAA
TP1148	G/T	4U	57.32	TGCAGAACGATAGGACTCGATGGCATACCTGCCTCGAGAAAATGCAGCCGAAAAAAAAAAAAAA
TP12831	C/G	4U	57.32	TGCAGCATACTTGCGTGCATAGAGCACACCTTCCTTCACACTCATGAGTTCAGCTTCAAGGGGG
TP1640	A/G	4U	57.32	TGCAGAAGCGACCTTTTAAGCGCCTGAAGGCCCGTTCGGAGCTGCGCAACGGCGTCAGTCGTTG
TP16642	C/G	4U	57.32	TGCAGCCGCACAACACCATGTCTGCGTTGAGAAGCACCACGACGGAGATGGCCAGGACGACGGC
TP16784	C/T	4U	57.32	TGCAGCCGCCCGTTGATGATATTTTGTAAGCACACCATTGGTTCTGTATGGAAACCCGTAGTTA
TP18478	C/G	4U	57.32	TGCAGCCTTTCAGACTTTGGTCATACGGTGGATCGGGGAGGGCTACACGGATTGGTTCTTTTGT
TP1873	C/T	4U	57.32	TGCAGAAGTAACGGAAGCAGAGGCTCACAATCTCCATAATTAGTATGCCACAGAATATGGAACG
TP19034	A/G	4U	57.32	TGCAGCGAGCATATGGGCATACGGGGGTTCGTCGTTGGATGGAGCGCAATGCAGGGAAGATCAG
TP21156	A/G	4U	57.32	TGCAGCGGCGAGCACTAGCACGCAAGAGAGAGGACAGGTGAGTCGTGACCGAAAAAAAAAAAAA
TP21189	C/T	4U	57.32	TGCAGCGGCGCCCTCACGACAGATTTGGCCGTCTGCACTTTAGAGGAGGTCAATGATAACAACA
TP23303	C/T	4U	57.32	TGCAGCTAGCTAGCAGCCAGCTTCATCGATCTGCTAGCTGATTTCTCTCATTCGATCGTTGGAG
TP24028	A/G	4U	57.32	TGCAGCTCCACTTCGACATGAGCTTAAACAAATTCTGAATATTAATGTCAAAGTGTTTACTGAA
TP25024	A/G	4U	57.32	TGCAGCTCTCGGAGGCGGAGAGGAAAGTGGTAAAAATCGGGAAAAATGCAAACTTCATGACAGT
TP25047	C/T	4U	57.32	TGCAGCTCTGAAGGATGTGAAGTGCATTTGCGATGTTTTTAAAAGAATTTTTACCAAGTGACAG
TP27496	A/G	4U	57.32	TGCAGCTTGTTGCATTGTGTACTACTAATACATGCTTTTGCTCTTGAAATCCATATGTACAGGT
TP2954	C/T	4U	57.32	TGCAGACCCGTGTGTGTGTGTGCGGGGTGCTATCGGCCGTTGGATCAAAAGACGATCCAAAGGA
TP29786	C/T	4U	57.32	TGCAGGAGGCGGAGGCCGACCCCGCCAAGCGTCCCCGCCGACCCCTGCGGGCTATCCATCCACA
TP30478	C/T	4U	57.32	TGCAGGATGTGTTTGTCTTGCCAATAGCACTGATTGACTGATCGATTTTAAACGACACAAATTA
TP31388	C/T	4U	57.32	TGCAGGCCCAAGTGAATCAATTGGCCTCCATGGCATACGAGCAATGGGATCAATTGGAGGAAGT
TP36146	T/C	4U	57.32	TGCAGGTAGGGATGATCTCATCTTCAGAGTCTTTGGTCCAGAGCGACCACTCGAGCTGCACGGC
TP38051	G/T	4U	57.32	TGCAGGTTCGTCAGGTTGCAGATCGATTCGGGGATATCTCCGTAAAAGTTGTTGAAACTCAAGT
TP38062	C/T	4U	57.32	TGCAGGTTCGTGAGATCGCAGATCTGTTCTGGTATCTCTCCAGATAATCTGTTGGAGCTCAGGT
TP38959	C/T	4U	57.32	TGCAGTACCCTACGCTTGACCTTCAGATCCTTATTAGTGGCGACGATGAGATGTCTGCGCCGCC
TP41416	A/G	4U	57.32	TGCAGTCGTACGCCGCCCCTAAAGAGTGAAGACCTACATCTCGCCAGGGTAGTGGATGGGCACG
TP41495	A/G	4U	57.32	TGCAGTCTAAAGGACTTGAAGGGCCCATCTCTCCATTCCTCACCAACCTCACCAGCCTACTGTG
TP42930	C/T	4U	57.32	TGCAGTGCTGCACATGCACGCCTGGATTTTCATAGTACCACGTCTGAGTCGTTTGTTGATTGCG
TP43571	C/T	4U	57.32	TGCAGTGTATACATTGTGGCACACAAATGCACTGAACAAAAGTCAATCGAGATGGAGCTACGCC
TP43664	A/G	4U	57.32	TGCAGTGTCGTAACTTTCTTCACTACATTTTTTTTGTGCGAAGGTAACAGCCAATTAAATTAAA
TP43704	G/C	4U	57.32	TGCAGTGTGACGCACCAAAACTCATCGACACTGCCTTATTTGGATGGATGCGTGGCCGAAAAAA
TP44108	G/T	4U	57.32	TGCAGTTAGGTTGGTTGGTTACGTTTCGCCGTGCCAAACTCGTTTCCGCGCGGGATAGCTAGCC
TP44127	A/T	4U	57.32	TGCAGTTATACGAATCGATCCCAATAAGAATTATGTAGGATCAAAGAATCCCATCTAGCAAAGA
TP4524	G/T	4U	57.32	TGCAGAGCGCATGCATGCCAGAAAGTCGACGCATATGGCTGTCAAAACGGCAGCGGAATAAATC
TP45512	C/T	4U	57.32	TGCAGTTGTTTGCCAGAAATCTTGGTTATTTATGTTGTTGGTCGCCTTCAATCTCCACAAGAGC
TP4876	A/G	4U	57.32	TGCAGAGGCCGCACAGGGGTTGAAGATGGCAGCTCATGCAGCGCTCCTGTCAGGCGGTTGAAGC
TP4885	A/T	4U	57.32	TGCAGAGGCCTGTCACCGCTGTCGGCGGTAACCAAAGATGGCAGTTCGGGCAGGGGACCATTTA
TP5315	G/T	4U	57.32	TGCAGAGTGAACATTGAAATTCCCATGCCCAAAAATCATCTTGTCTTGTTGAGCTAATAGGAAT
TP5809	G/T	4U	57.32	TGCAGATAGTCGGCGACGTCGAGCGACAGTGAGGAGAAGAAGGGTAGTCTATTCTTGCCGAAAA
TP6833	C/T	4U	57.32	TGCAGATGATCCCTTCCCACGCGCAGCAGTCCGTGCCCCTCCGCCAGGCCGCCGCGAGCCCGCC
TP774	A/T	4U	57.32	TGCAGAAATGCAGAGCATTGGGTGTAATTACTCTTAGTAGTATATATATTATTGTGTAATTCAA
TP9804	C/T	4U	57.32	TGCAGCACATCCTTGCGCGGCAGAGGAGGAGTTCCTTCCGCGGCCAGCTCCAGCAGCTCAGCTG
TP14957	C/T	4U	57.35	TGCAGCCATGGCCCAACTGCCGTCTCCTCCTCCTCCTCCTCCTCCTCCTCTGCTCTCTCTGCTT
TP19855	A/C	4U	57.35	TGCAGCGCCGAAATTGTTGCACCAGATGCATAACTGAAGTAACTGTTGCTCCCATTCTTTCTTA
TP23034	C/T	4U	57.35	TGCAGCTACATGGCACTGGTACTCAGGGCATAGGGACATACGTGCATAAAGACTTTCCGAAAAA
TP30673	C/T	4U	57.35	TGCAGGCAAGATAGCATGATCACCAATGTCATGCTGGCTTCAGAAGGCCTTGAGGGGAACATCC
TP43506	A/C	4U	57.35	TGCAGTGTAAAGACATTTGGTCCACGCGTGAATTGAATGGATATAACAACACAACACAATACCA
TP11471	A/G	4U	57.52	TGCAGCAGCCACTCCCACTCGACTATTCCTTGCTAGTGCACCATCAACATTGATTTTACCCATA
TP1359	A/G	4U	57.52	TGCAGAAGAACCACACACGCACATACGTCAGGCCAGGAGAAACGAACACGGGCACCGTGAGGGG
TP14638	A/G	4U	57.52	TGCAGCCAGGCGATGACTTGCAATTGGCCTATTGTTTAGTTTCACTTCTGTAATTCTTGTTGTT
TP16115	C/T	4U	57.52	TGCAGCCCGTGACACCGTGGAGCAGCACGGATCACCGTAAACGCCGCCCGCAGCCTCCCCTGGT
TP20545	C/T	4U	57.52	TGCAGCGCTCGTGGGCGGCGCAAGCGGGAGTGCGGGCGTGAGCTCGCATGACACACTAGTAGAA
TP25191	A/C	4U	57.52	TGCAGCTGAACCGAACCCATTAGCTCGACATTATGATGCAACCAGCGTCCAATAGGGATTTCTG
TP31999	A/C	4U	57.52	TGCAGGCGAGCACGTAGACGAGGTCGCTCTCCTCCGTTTTGCCGTGGCAGAGGCCGAGCTCCTA
TP32149	G/T	4U	57.52	TGCAGGCGCCATGCGTCTCGTTCAGAGAACCAAGTGCCCAGCGTCAGTCAGCACACTTGCCGAT
TP38148	C/T	4U	57.52	TGCAGGTTGAGTGGACGCGTACAGCACGTGCCCCTCTATCATTTCGTCCTTGATCAATTCCTCT
TP39186	G/T	4U	57.52	TGCAGTACTGCTACCAACTAAATGAGTTTTTTGGGGGGGTATCCGAAAAAAAAAAAAAAAAAAA
TP41927	C/T	4U	57.52	TGCAGTCTTTGGTGTGCGTGCTTTTTGGGTGGTTAAGAGCGGGCGTCGACGTGTCTTGCCCAAC
TP42034	A/C	4U	57.52	TGCAGTGAATGCACCTTTGCCATGCGCTTGCTTCGGTGCACAGAGATGTGAATGAACCGAAAAA
TP45162	A/G	4U	57.52	TGCAGTTGCGATCGCCGCTCGGCCACCGCCCACCTATAGGCCATAGCCGCACTGCATGTAGTTG
TP7173	C/T	4U	57.52	TGCAGATGGTCCGCAATCGGCACATAGATCCTTCTTCGCTGGTTGCGGAATATCCTGGGTTGTT
TP18600	G/T	4U	57.61	TGCAGCGAAGGCGAACCAGGTTTCCTCTGGCAGCCCATGGTACGGTGCCGACCGTGTGGTGTAC
TP28247	C/T	4U	57.61	TGCAGGAAGCGATTGTAATATGGGATGAATATCATCGGCGAGTTATGATCCAGGCAGACCGAAA
TP30858	C/G	4U	57.61	TGCAGGCAGAAAAAAGAGGAACGATGCATGAGGGAGGCAGTGAATGTGACGGGGGAGAGAGAAA
TP33798	C/G	4U	57.61	TGCAGGGATCAGAATCAAAGGGGGCGACGGATGGATTTGTTGCGGTGTCCGCGGCGCCGCACGC
TP36345	A/G	4U	57.61	TGCAGGTCACCTCTATCATCAGTCTCGAGCTTGCTCTAGACATGCATTTAACAGCCACTACTAC
TP39176	C/T	4U	57.61	TGCAGTACTGATGGCACCGCGGTTCACCTGAGATACTGACACAGCCTATAGCCGAAAAAAAAAA
TP41736	C/T	4U	57.61	TGCAGTCTGCCGCCGCCGCTCGTGCTCGCCTGTCGCTGCGCCCGTCCGCGCCCCCAACTCGCCG
TP42937	C/T	4U	57.61	TGCAGTGCTGCCCGATGGTTGTGGTGCCGTCGCGCGCGTGCGGAGCTCCAGTCGGTGGCCCCTA
TP43282	C/G	4U	57.61	TGCAGTGGCGGTTCAGCGAAGCGGCAGCGGGTTGGAGACGAACGCGGCAGTTCGGGGTGCAGCC
TP22171	A/G	4U	57.64	TGCAGCGTCGCGGTGTTGAGCACCGTGATGTAGAGTCTCCCTGGGTGTGTCCAATAGAGGGATC
TP26031	A/G	4U	57.64	TGCAGCTGGAGAGTTGGAGGCGTCAGCTGATGGCGCAAAAACGGAACTGTGGGTCACCGAAAAA
TP28522	C/T	4U	57.64	TGCAGGACAACGAGTTCATCTGCGGCAGCTATCGCTGTGAGCAGTCCGTCTACGACGCGCTCCA
TP4296	A/G	4U	57.64	TGCAGAGCAATCTCAGCAAACTTTTCGTCATGACTATCAGAGGCTTTTATGAACTTTATGCTTT
TP4766	A/C	4U	57.64	TGCAGAGGAGCGAGGCGACGGACTTGAGGAGACGCCGCCGCCGCCGCAGCAGCAACTGGAAGAT
TP15100	A/G	4U	57.68	TGCAGCCCAACGATCCTCATCACAGGCAAGAGAGAGGAAGAAGCACAAGTCCAGAAGAAGCAAT
TP28705	A/T	4U	57.68	TGCAGGACCGAAGTAATACGGGACAAAATAGTTGGTTACGTACGTTGAACGTGGGTGGCTGGAC
TP33711	A/G	4U	57.68	TGCAGGGAGGAGAAGAATAGTTGGATACAAAACCGTATGATTCATCTTTACATACTTGAGCATA
TP44478	C/T	4U	57.68	TGCAGTTCCCATAGCTCAATGGGATTCTTTAAGGCCAACTCCACTGCGCGACCCTATCCTGTCC
TP6918	A/G	4U	57.68	TGCAGATGCCAAGCTCGCGGAGGTGAGGAAACGTCCGAAAAAAAAAAAAAAAAAAAAAAAAAAA
TP9802	A/G	4U	57.68	TGCAGCACATCCTTCGGCATGGCGGAGTAGATCGCCATTAACGCCTGACGATCCTTCCAGTACT
TP20014	A/G	4U	57.87	TGCAGCGCCTCCACCTCTTGTCGCCGCTCGAGCCCGCATAGAAGCCGACCGAGCTCGCCCCTTA
TP858	A/T	4U	57.87	TGCAGAAATTTTCAGCCTTCCATTAATTTCTACGCAAGCAACATTGCGAGAAAGATTGATCATA
TP10138	C/G	4U	58	TGCAGCACCGCGCGAACACGCTGCTGCCGAGGAACACGAGGCGCGGGACGCCGTGCTCCGCGGC
TP1042	A/G	4U	58	TGCAGAACCATGAAACAAGGCGATTTGATCAATACATAATGGTAGCCATACCCAAGATAAACTG
TP12657	A/G	4U	58	TGCAGCAGTGAGGTACTCGCCGCTAGCCTCTTATACCTCTGTATATACTCCATGGATTTCCTTC
TP12973	C/T	4U	58	TGCAGCATCAGCGGGGTAGGCTGCGACGGTGCGGAGAGCAGGCCGAAAAAAAAAAAAAAAAAAA
TP13291	C/T	4U	58	TGCAGCATGCACACCATGAAAACATGCCTAAGTTCCGAAAAAAAAAAAAAAAAAAAAAAAAAAA
TP1428	C/T	4U	58	TGCAGAAGACGCGTGGAGCTCTTGTGCTTTCCTTAGTGGGGTTCTCTTATCCAACTTGGACTCA
TP1513	G/T	4U	58	TGCAGAAGATCTGAGAGCCAAAACCTTGGCGGTGCGCATCGAGTTTGCCGAGCTGACCGAAAAA
TP17441	A/G	4U	58	TGCAGCCTACATCAATCCCACGTCTAAGGACTAAAATAGCCTATACGCGAGGGTGGGTGTTGAA
TP19475	G/T	4U	58	TGCAGCGCACGGCGCTGTTCGCGCGGCTCGTGGCCGCGGCGCTCTGCCTGGCGGCGCTCGCGGT
TP25960	G/A	4U	58	TGCAGCTGCTTCAGGGTGGACGCGAGCCAATCGAGCCCGTCGTAGAGGCCCTCGCCGCGGAGCG
TP30467	C/G	4U	58	TGCAGGATGTCGGCCATCCATTGCTGGAGTGACGGCGAGGCTACTGCTCATGCCGAAAAAAAAA
TP34136	C/T	4U	58	TGCAGGGCCCGCCATGGGCCAGACACGACACGGGCTAAACGGGCCGTGCCCGAAAAAAAAAAAA
TP3627	C/T	4U	58	TGCAGACTCCTCAGATCCATGCGATGAACTGAAGCAATTTGCTGATTCCAAGTTAACTTATGAA
TP39745	C/G	4U	58	TGCAGTATAGATCGTCTGTGCCTCTGATCCTCGCAGTTCTGCCAGTAGATAGTTTCGGCCAACA
TP41763	C/T	4U	58	TGCAGTCTGGGTCGAAGCAGCCCAGGTAGCACTGGCAGAACGCCGACATGGGGTCGGCAACCCC
TP4477	A/G	4U	58	TGCAGAGCCTGCAAGTGCAGATAAGGCTCAAGGTTCAAAGCACTCCATTGAGCAAGTGGATCCA
TP5457	A/G	4U	58	TGCAGAGTTCTTGAAGGATATCAATGACACCTAATCGATCTTGATGTTCTAATTTTCAGAGGAG
TP9174	G/T	4U	58	TGCAGCAAGGCGCAATGCCAGTTCACGGCGTACACTCCTGCCACTCCCACGCCCGAAAAAAAAA
TP24405	C/T	4U	58.23	TGCAGCTCCTCTGACCACGGCTGAAGGGACGCGTCGTACACCATGCCGCGGACGGGACAGGCCG
TP29644	A/G	4U	58.23	TGCAGGAGGAACTTGCCTGGCCGAATGCTTCCCCCATCCTAGCTTTTTTTTAGAAAAGAAGGAT
TP3178	A/G	4U	58.23	TGCAGACGAGAGAGGCGCGGGAGAGGGAGGATGGCAGTGGGTGTAGGCGTAGGAGGATCTCGGA
TP4303	A/G	4U	58.23	TGCAGAGCACAAGCAGCAACGTCAAAGCACAACACGGCAACACGGTGGCCGAAAAAAAAAAAAA
TP43323	G/T	4U	58.23	TGCAGTGGCTGGAGTTGAGTGGCTTGGGGATCTGCATGTAGGTACTGGTGGTGGTTCACTATTG
TP7326	C/T	4U	58.23	TGCAGATGTTACAGCCGCTGCGGTCATCCGTGCGAGCCTGAGGAGGCTGCTCGTCGCATCGGCT
TP38417	C/T	4U	58.33	TGCAGGTTTGTGAATAACAGGCGCGCCGCCCAGCGCACACGTCGCTCACCTTGCCGCCGAAAAA
TP41066	C/T	4U	58.41	TGCAGTCCTTCCTCTACCAGATCCTGCGCGGCATCGCCTACTGCCACTCGCACCGCGTGCTTCA
TP42349	A/G	4U	58.59	TGCAGTGCAACATGGGCGGTGCTACGACCAATGGATCTCGTCAATGACGGAGCTGCAATGCAGC
TP9086	C/T	4U	58.59	TGCAGCAAGCTAGAAAGACCCTCCGCACAAACCAAGAACGGGTAAGGTGATAATGGGTCACCCT
TP10497	C/T	4U	58.95	TGCAGCACGGGAAAAAATATGTCTATATTTCCATGACCCGAAGAACTCAAACCACGACTGCCTG
TP13404	A/G	4U	58.95	TGCAGCATGGCAGCAGCTCGCTCAAACTCCTCCCTGATGATCCTGATTGTCTGCCTGTCGACTA
TP17714	A/G	4U	58.95	TGCAGCCTCCCGCCCGCTGCTCTGGTGATGCGCGCTTCACCAAAAGACCGCACAACAGCCAGTG
TP18238	A/T	4U	58.95	TGCAGCCTGTCACTAGAAAAACTCAGCATCCCTGGAGACTTGGACAAAGCAATGCGCACCTCAG
TP23302	C/G	4U	58.95	TGCAGCTAGCTAGCAGCATTCAGTTGAGATGGTTCTTCGGTTAGCGATTGCTTTCAGCTGATGC
TP24005	C/T	4U	58.95	TGCAGCTCCACGCCATTGTAGCCGCCAGCCGTGCACCGTCAACAGACCGCACAGCAGAGAGAAA
TP24395	A/G	4U	58.95	TGCAGCTCCTCGGATAGATCAATGGAAGAAGTCACTACAAAATCAGATTGCCCTCAACGTAGAC
TP29678	C/T	4U	58.95	TGCAGGAGGAGACGGAGGCGGTGCGGCGTTGGGCCAAGACGGGAGACCCCGAGGCGAAGGCATA
TP30020	A/G	4U	58.95	TGCAGGAGTATTAGAGATCTCAAAAATAAATAAAAATCATTTTCTTTTACAATGTTTTGTTTGG
TP38656	A/T	4U	58.95	TGCAGTAACTTGTTCCTTGTTTGTGTATTCTATTGCAACAGAAATTTTCAGCCTACCATTAATT
TP3949	A/G	4U	58.95	TGCAGAGACCATAAGTAACTCGACGCCTCGATCCATAAGACCAGCCCTTCGCACTAAACCTAAG
TP4435	C/G	4U	58.95	TGCAGAGCCCCATGAGCAGCGTGTTGTAGGTCCGATCGTTGGGCTCCCACCCATTGGCCTCCAT
TP45290	C/T	4U	58.95	TGCAGTTGGCTTACTTGCTGCACGAACAAAAGAAAGACTGGCTCGAATGGACTGACTAGTTCGG
TP46237	A/G	4U	58.95	TGCAGTTTTTTTTAACGGAACAGCTCAAACCGAGCTCCACAGCTCCGTGGAGTGGAGCGGAGCG
TP829	A/C	4U	58.95	TGCAGAAATTCAGTCATGCAACTTAAATACAAAGAAGATCCAAGTGCTATAACTCCTGGAGAAC
TP31258	A/G	4U	59	TGCAGGCCACGGCGAAGGTCGGATCGCACGCACTGCGACGGCCGAAAAAAAAAAAAAAAAAAAA
TP12837	A/G	4U	59.67	TGCAGCATAGACACTTTGAAATGGCTGACAGTGACAGCGATCCTCTCTGGATGTGAAAAGTTCC
TP13685	C/G	4U	59.67	TGCAGCCAAACAAATAGTCAAGTACTGAGAAGTCACTGCCTTTAGTTTGGTGAAGCAAAATTCC
TP19134	C/T	4U	59.67	TGCAGCGAGGGGCCGTTCCTCCTGGCCTCGGCGGGCATGGAGGACATGGAGTACGGGTCGGTGC
TP19601	A/G	4U	59.67	TGCAGCGCATGCACCGAATCCGCCGCAGCACCCGACCAGGCTATCTGCACCACAGTCTTCAAGG
TP21312	C/T	4U	59.67	TGCAGCGGCGGGGCGTTCCTCATGGCCTCCGCGGGCGTGCACGTCATGGACTTGGTGCAGGCCG
TP23605	C/T	4U	59.67	TGCAGCTCAACCAAACATAGCCTTAGAGTTGTTCTACTTTGCACCTTGTATCCCTTTTTTCCGC
TP24526	C/T	4U	59.67	TGCAGCTCGACGGCGCCGAGTGGGCCTTCAGGCTACTCGACTGCCGCCACGGTCTCATGCTCAT
TP26737	A/G	4U	59.67	TGCAGCTTATTGGCCATCATCTGCGGGTTGACGAGGCGGACGGCGCCGAAAAAAAAAAAAAAAA
TP26872	C/T	4U	59.67	TGCAGCTTCCCATGCTTCTGCTACCATCTCATCGTATTTCTCGTGGCGAGTCCATGCCTCCTCA
TP26946	G/T	4U	59.67	TGCAGCTTCGAGGATGCCATGTTGGCCAAGTATGGTTGCGGCACGGTGGCGCAGGGGGCTGGCC
[truncated: 3,406 more rows]

## Sheet: Framework_map
Markers on Ae. umbellulata framework map with segregation distortion p-value.
Marker	Chr	Segregation distortion(pval)	Consensus(cM)
TP9663	1U	0.1824	0
TP11940	1U	0.3766	0
TP18365	1U	0.6937	0.74
TP2652	1U	0.7222	0.74
TP36958	1U	0.8315	0.74
TP1716	1U	0.6025	1.41
TP10417	1U	0.7173	2.75
TP3277	1U	0.7173	2.75
TP27181	1U	0.8146	2.95
TP31757	1U	0.8445	2.95
TP18785	1U	0.5984	3.09
TP24840	1U	0.5984	3.09
TP37062	1U	0.9681	3.67
TP25789	1U	0.9206	4.75
TP6797	1U	0.6357	5.83
TP12036	1U	0.8881	5.83
TP22136	1U	0.3383	6.24
TP19692	1U	0.4028	6.58
TP3802	1U	0.9074	6.91
TP44856	1U	0.3716	7.32
TP11364	1U	0.2958	8.32
TP42419	1U	0.7581	9.5
TP36611	1U	0.7691	9.86
TP8670	1U	0.6954	10.22
TP18749	1U	0.0579	10.3
TP1133	1U	0.8817	11.01
TP36346	1U	0.8506	11.37
TP20527	1U	0.8881	11.73
TP34677	1U	0.9475	11.73
TP29165	1U	0.1349	13.16
TP32293	1U	0.8146	13.96
TP26942	1U	0.6198	14.68
TP29741	1U	0.1331	14.97
TP19452	1U	0.3666	15.4
TP5375	1U	0.0803	17.78
TP45301	1U	0.0139	18.93
TP39908	1U	0.0166	18.93
TP43513	1U	0.0166	18.93
TP14616	1U	0.0217	18.93
TP28577	1U	0.026	18.93
TP31732	1U	0.0445	19.29
TP5737	1U	0.0006	20.35
TP14622	1U	0	22.5
TP14812	1U	0	22.64
TP15762	1U	0.0553	22.64
TP30453	1U	0.1255	22.64
TP40295	1U	0.0442	24.66
TP1876	1U	0.0616	25.38
TP44152	1U	0	25.74
TP3752	1U	0.0341	25.74
TP3778	1U	0.0711	25.74
TP43284	1U	0	26.07
TP41988	1U	0	26.74
TP35525	1U	0.0013	28.55
TP12804	1U	0.0005	28.91
TP17007	1U	0.0005	29.99
TP6532	1U	0.0051	31.53
TP25558	1U	0.022	32.94
TP20140	1U	0.1512	35.64
TP15585	1U	0.122	36.98
TP12859	1U	0.1788	40.07
TP45769	1U	0.1103	44.65
TP4796	1U	0.1322	45.72
TP5596	1U	0.0645	47.47
TP16056	1U	0.0866	48.14
TP36482	1U	0.114	48.81
TP26763	1U	0.022	50.89
TP27231	1U	0.0226	53.71
TP42411	1U	0.0002	59.34
TP5235	1U	0.0186	62
TP43414	1U	0.0349	63.15
TP32272	1U	0.032	63.51
TP41753	1U	0.0406	63.51
TP17946	1U	0.0514	63.51
TP14185	1U	0.0005	66.68
TP1385	1U	0.0166	69.42
TP5919	1U	0.0166	69.42
TP38454	1U	0.0209	69.42
TP18447	1U	0.026	69.42
TP36886	1U	0.0318	69.42
TP6355	1U	0.0329	69.42
TP45662	2U	0.9206	0
TP38110	2U	0.4484	1.35
TP33896	2U	0.3228	2.09
TP15120	2U	0.3271	2.76
TP2708	2U	0.5672	2.76
TP19904	2U	0.1418	3.1
TP3062	2U	0.1974	3.1
TP1752	2U	0.1989	3.1
TP24398	2U	0.2107	3.1
TP2975	2U	0.5268	3.1
TP39315	2U	0.7078	3.1
TP32845	2U	0.1439	3.46
TP13332	2U	0.1428	4.25
TP34533	2U	0.8952	5.51
TP38843	2U	0.2247	5.83
TP11126	2U	0.0882	6.98
TP39900	2U	0.1033	6.98
TP45811	2U	0.6272	7.58
TP44904	2U	0.1439	7.77
TP11650	2U	0.2199	7.77
TP18031	2U	0.1722	8.57
TP44075	2U	0.5634	8.91
TP27621	2U	0.1143	9.65
TP45053	2U	0.4828	9.65
TP22151	2U	0.5094	9.65
TP11108	2U	0.5521	9.65
TP7707	2U	0.1329	10.01
TP40278	2U	0.1974	10.36
TP3096	2U	0.2215	10.36
TP17619	2U	0.4424	10.56
TP31777	2U	0.5094	10.9
TP42764	2U	0.5094	10.9
TP44828	2U	0.1798	11.52
TP31205	2U	0.1877	11.52
TP722	2U	0.2168	11.88
TP12279	2U	0.1513	12.24
TP1229	2U	0.1513	12.24
TP7781	2U	0.1974	12.24
TP28799	2U	0.3084	12.6
TP45473	2U	0.3827	12.95
TP26902	2U	0.4142	12.95
TP45079	2U	0.5521	13.32
TP9495	2U	0.4193	13.65
TP34216	2U	0.4454	13.65
TP8127	2U	0.5559	13.65
TP36854	2U	0.3827	13.67
TP5087	2U	0.3827	13.67
TP13818	2U	0.3436	14.03
TP25456	2U	0.3436	14.03
TP17921	2U	0.4549	14.39
TP4896	2U	0.3869	16
TP35482	2U	0.4454	16.4
TP4014	2U	0.3338	16.8
TP42570	2U	0.3314	17.42
TP8605	2U	0.3719	17.42
TP42284	2U	0.1932	18.21
TP5159	2U	0.2398	18.21
TP12133	2U	0.2997	18.21
TP41829	2U	0.4307	18.21
TP25382	2U	0.4365	18.55
TP5839	2U	0.2577	18.64
TP1902	2U	0.2954	19
TP40872	2U	0.3452	19.22
TP15035	2U	0.2152	19.36
TP42887	2U	0.2432	19.36
TP8081	2U	0.3411	19.36
TP40433	2U	0.623	20.63
TP2328	2U	0.4853	20.94
TP17578	2U	0.5406	21.74
TP42948	2U	0.6242	23.97
TP31749	2U	0.7157	24.69
TP27187	2U	0.7004	26.99
TP882	2U	0.7313	26.99
TP30372	2U	0.7972	26.99
TP32529	2U	0.5094	27.15
TP1226	2U	0.5787	27.15
TP15964	2U	0.7157	27.78
TP940	2U	0.4424	27.95
TP45686	2U	0.8146	28.93
TP30158	2U	0.8629	28.93
TP35585	2U	0.8817	28.93
TP31492	2U	0.8754	30.37
TP35076	2U	0.8881	30.37
TP4646	2U	0.8881	30.37
TP5960	2U	0.8881	30.37
TP22436	2U	0.2998	32.12
TP37894	2U	0.6756	32.24
TP39357	2U	0.6756	32.24
TP44908	2U	0.7802	32.24
TP29382	2U	0.4336	32.45
TP25441	2U	0.7366	32.6
TP38720	2U	0.7802	32.6
TP30456	2U	0.8881	32.6
TP2622	2U	0.6025	33.8
TP2058	2U	0.6357	33.8
TP45136	2U	0.7691	34.12
TP13805	2U	0.7125	34.13
TP4361	2U	0.6612	34.48
TP5362	2U	0.6612	34.48
TP15103	2U	0.6805	34.48
TP3417	2U	0.6805	34.48
TP38960	2U	0.6805	34.48
TP7641	2U	0.6805	34.48
TP13145	2U	0.6198	34.84
TP15817	2U	0.6198	34.84
TP17450	2U	0.6198	34.84
TP15110	2U	0.5905	35.15
TP21020	2U	0.5484	35.19
TP32032	2U	0.5685	35.19
TP4578	2U	0.6612	36.71
TP6605	2U	0.7366	37.43
TP30112	2U	0.6756	37.79
TP35497	2U	0.6756	37.79
TP28488	2U	0.7054	37.79
TP38193	2U	0.7054	37.79
TP45776	2U	0.7054	37.79
TP45991	2U	0.7054	37.79
TP11379	2U	0.2518	38.01
TP2625	2U	0.6854	39.66
TP23910	2U	0.7802	39.66
TP29759	2U	0.6708	40.74
TP22729	2U	0.7419	40.74
TP19378	2U	0.7858	40.74
TP42238	2U	0.2451	41.94
TP31741	2U	0.3163	42.61
TP43057	2U	0.3267	42.61
TP23584	2U	0.4172	42.61
TP46233	2U	0.3152	42.97
TP8589	2U	0.3746	42.97
TP27162	2U	0.2693	43.29
TP44922	2U	0.6065	44.05
TP23043	2U	0.6854	44.05
TP13018	2U	0.4853	44.41
TP10680	2U	0.6065	44.77
TP40429	2U	0.6065	44.77
TP26449	2U	0.4336	46.05
TP43651	2U	0.4336	46.05
TP42715	2U	0.4923	47.36
TP25498	2U	0.1574	47.73
TP19230	2U	0.1253	48.4
TP12871	2U	0.1195	48.73
TP31354	2U	0.1824	49.74
TP10202	2U	0.8324	50.38
TP21827	2U	0.7004	50.74
TP41561	2U	0.7004	50.74
TP44890	2U	0.7581	50.74
TP28171	2U	0.8205	51.1
TP30950	2U	0.2518	51.82
TP345	2U	0.5524	51.82
TP13071	2U	0.5767	51.82
TP24004	2U	0.6022	51.82
TP971	2U	0.7526	53.33
TP30264	2U	0.5252	54.41
TP29886	2U	0.2535	54.75
TP42042	2U	0.6287	55.08
TP38248	2U	0.411	55.42
TP10199	2U	0.5564	56.16
TP18076	2U	0.5564	56.16
TP24217	2U	0.6109	56.16
TP45288	2U	0.6109	56.16
TP1953	2U	0.6198	56.16
TP8024	2U	0.6198	56.16
TP13976	2U	0.4172	56.52
TP22634	2U	0.2933	57.6
TP27945	2U	0.3244	57.6
TP9862	2U	0.3314	57.6
TP29346	2U	0.3452	57.6
TP30050	2U	0.3716	57.6
TP35920	2U	0.3843	57.6
TP24370	2U	0.3921	57.6
TP31734	2U	0.3921	57.6
TP16144	2U	0.4028	57.6
TP28923	2U	0.4028	57.6
TP39302	2U	0.411	57.6
TP13089	2U	0.4336	57.6
TP19294	2U	0.4336	57.6
TP20595	2U	0.4336	57.6
TP27016	2U	0.4336	57.6
TP37614	2U	0.4336	57.6
TP2172	2U	0.4926	57.6
TP25431	2U	0.5128	57.6
TP31948	2U	0.5128	57.6
TP38954	2U	0.5303	57.6
TP45703	2U	0.5103	58.75
TP25819	2U	0.6612	58.75
TP31295	2U	0.5685	59.11
TP22159	2U	0.529	59.47
TP13047	2U	0.6287	59.47
TP29389	2U	0.7004	59.83
TP44255	2U	0.7004	59.83
TP44256	2U	0.7004	59.83
TP32257	2U	0.6109	60.19
TP5700	2U	0.6109	60.19
TP1184	2U	0.571	60.2
TP12109	2U	0.6315	60.2
TP32063	2U	0.6315	60.2
TP45848	2U	0.6315	60.2
TP22089	2U	0.7691	61.63
TP20694	2U	0.5094	61.97
TP18765	2U	0.5339	61.97
TP23484	2U	0.6106	61.97
TP31695	2U	0.8324	61.99
TP41719	2U	0.8324	61.99
TP999	2U	0.8324	61.99
TP21402	2U	0.8384	61.99
TP28305	2U	0.3228	62.71
TP31481	2U	0.3383	62.71
TP21392	2U	0.7581	62.71
TP2188	2U	0.9195	62.72
TP29694	2U	0.9195	62.72
TP19840	2U	0.8427	63.06
TP42139	2U	0.2747	63.38
TP45490	2U	0.3869	63.38
TP12713	2U	0.3921	63.38
TP40346	2U	0.4336	63.38
TP19076	2U	0.4082	63.71
TP29061	2U	0.7691	64.51
TP44342	2U	0.8506	64.85
TP42841	2U	0.8324	65.4
TP38009	2U	0.8881	65.4
TP6501	2U	0.8881	65.4
TP7875	2U	0.8881	65.4
TP31748	2U	0.7418	65.48
TP573	2U	0.4514	65.8
TP36189	2U	0.4828	65.8
TP42253	2U	0.4828	65.8
TP3250	2U	0.5339	65.8
TP5211	2U	0.5672	65.8
TP7028	2U	0.8146	66.12
TP34192	2U	0.8506	66.48
TP9671	2U	0.6153	66.62
TP36453	2U	0.7526	66.62
TP45600	2U	0.486	66.94
TP31339	2U	0.5672	66.94
TP595	2U	0.6798	66.94
TP34451	2U	0.689	66.94
TP18974	2U	0.7004	66.94
TP35507	2U	0.762	66.94
TP19831	2U	0.6198	66.98
TP31045	2U	0.6904	66.98
TP4147	2U	0.7691	66.98
TP26071	2U	0.8324	66.98
TP10521	2U	0.5944	67.01
TP36452	2U	0.8427	67.01
TP40311	2U	0.8427	67.01
TP30859	2U	0.7581	67.2
TP21434	2U	0.7858	67.2
TP9895	2U	0.7858	67.2
TP12177	2U	0.8088	67.2
TP3120	2U	0.8088	67.2
TP45491	2U	0.8427	67.22
TP4144	2U	0.5367	67.34
TP23913	2U	0.7054	67.34
TP35470	2U	0.7054	67.34
TP488	2U	0.7078	67.34
TP43125	2U	0.7526	67.34
TP2094	2U	0.7581	67.34
TP36009	2U	0.7581	67.34
TP12130	2U	0.762	67.34
TP12746	2U	0.762	67.34
TP30287	2U	0.762	67.34
TP21286	2U	0.7775	67.34
TP30550	2U	0.7827	67.34
TP26541	2U	0.7858	67.34
TP16009	2U	0.8088	67.34
TP16348	2U	0.8088	67.34
TP31786	2U	0.8088	67.34
TP33492	2U	0.8088	67.34
TP42904	2U	0.8088	67.34
TP43349	2U	0.8088	67.34
TP489	2U	0.8088	67.34
TP25701	2U	0.8149	67.34
TP943	2U	0.8315	67.34
TP24138	2U	0.8754	67.34
TP19066	2U	0.8945	67.34
TP16431	2U	0.4028	67.56
TP4987	2U	0.6272	67.56
TP24673	2U	0.6443	67.56
TP5175	2U	0.6854	67.56
TP14664	2U	0.7173	67.56
TP22	2U	0.7827	67.56
TP22229	2U	0.7827	67.56
TP27789	2U	0.7987	67.56
TP43717	2U	0.8088	67.56
TP6568	2U	0.8088	67.56
TP2296	2U	0.8146	67.56
TP38376	2U	0.8146	67.56
TP23781	2U	0.8484	67.56
TP3739	2U	0.8754	67.56
TP20226	2U	0.8817	67.56
TP41737	2U	0.8952	67.56
TP41513	2U	0.9272	67.56
TP4849	2U	0.7581	67.68
TP18121	2U	0.7691	67.68
TP42737	2U	0.7691	67.68
TP22424	2U	0.8205	67.68
TP2246	2U	0.8324	67.68
TP36331	2U	0.9009	67.68
TP16474	2U	0.9573	67.68
TP8445	2U	0.7468	68.02
TP21890	2U	0.7723	68.02
TP5337	2U	0.8541	68.02
TP43412	2U	0.8754	68.02
TP38362	2U	0.7635	68.03
TP30947	2U	0.8324	68.03
TP35889	2U	0.8629	68.03
TP45366	2U	0.8754	68.03
TP31496	2U	0.8881	68.03
TP3608	2U	0.8881	68.03
TP12043	2U	0.7671	68.3
TP23578	2U	0.7775	68.3
TP39881	2U	0.8094	68.3
TP23662	2U	0.8484	68.3
TP18565	2U	0.9573	68.3
TP34661	2U	0.9573	68.3
TP35045	2U	0.6663	69.77
TP9838	2U	0.5787	70.11
TP43698	2U	0.8324	70.11
TP20866	2U	0.9638	70.11
TP7388	2U	0.7518	71.18
TP31007	2U	0.9134	71.52
TP25477	2U	0.8506	71.63
TP25447	2U	0.9966	71.86
TP32294	2U	0.9966	71.86
TP40098	2U	0.9206	71.99
TP9793	2U	0.8881	73.14
TP17503	2U	0.9573	73.27
TP11542	2U	0.9543	73.5
TP13016	2U	0.9681	73.5
TP14375	2U	0.8952	74.68
TP30228	2U	0.9751	75.68
TP9315	2U	0.8754	76.04
TP22284	2U	0.7827	76.35
TP21472	2U	0.5564	76.47
TP39766	2U	0.9893	76.47
TP8388	2U	0.9893	76.47
TP26460	2U	0.9893	78.1
TP18602	2U	0.8427	78.43
TP20997	2U	0.8945	78.89
TP17116	2U	0.9339	78.89
TP27519	2U	0.9822	79.25
TP38249	2U	0.8945	81.91
TP8636	2U	0.9195	81.92
TP10318	2U	0.8427	82.25
TP37555	2U	0.8384	82.27
TP19169	2U	0.8754	82.63
TP11101	2U	0.9751	82.63
TP18171	2U	0.6065	82.99
TP14531	2U	0.8205	82.99
TP30418	2U	0.8598	82.99
TP8687	2U	0.9407	82.99
TP2381	2U	0.9339	83.35
TP44067	2U	0.9339	83.35
TP17463	2U	0.9339	83.71
TP31787	2U	0.7054	85.66
TP42612	2U	0.9382	85.88
TP33780	2U	0.9573	85.88
TP36190	2U	0.6242	86.81
TP19699	2U	0.2522	87.17
TP6082	2U	0.4083	87.53
TP4558	2U	0.4172	87.53
TP45923	2U	0.4388	87.53
TP27197	2U	0.9703	87.56
TP34301	2U	0.5484	87.89
TP32284	2U	0.9134	88.56
TP24045	2U	0.9703	88.56
TP40115	2U	0.529	89.11
TP28218	2U	0.5767	89.11
TP29611	2U	0.6065	89.11
TP44300	2U	0.8204	89.24
TP24305	2U	0.4172	89.47
TP5701	2U	0.4172	89.47
TP12709	2U	0.4083	90.55
TP716	2U	0.529	91.27
TP3142	2U	0.442	93.14
TP3599	2U	0.3152	93.5
TP37357	2U	0.3152	93.5
TP33886	2U	0.4893	93.61
TP17745	2U	0.3107	93.86
TP4882	2U	0.2958	94.28
TP31155	2U	0.1176	94.94
TP154	2U	0.0015	96.81
TP1113	2U	0.0025	96.81
TP10924	2U	0.0029	96.81
TP28339	2U	0.0031	96.81
TP36547	2U	0.0031	96.81
TP28258	2U	0.0048	96.81
TP40200	2U	0.0074	96.81
TP36069	2U	0.1143	96.81
TP41725	2U	0.0061	97.17
TP4370	2U	0.0364	98.24
TP36512	2U	0.0145	98.46
TP486	2U	0.0152	98.46
TP1825	2U	0.158	98.46
TP39549	2U	0.3691	98.58
TP40070	2U	0.3691	98.58
TP25830	2U	0.571	99.25
TP12756	2U	0.0152	101.78
TP43978	2U	0.0176	101.78
TP29939	2U	0.0184	102.78
TP41232	2U	0.0757	102.78
TP46046	2U	0.0757	102.78
TP14839	2U	0.0815	102.78
TP18034	2U	0.1004	102.78
TP2131	2U	0.1095	102.78
TP12420	2U	0.1103	102.78
TP5409	2U	0.1187	102.78
TP20220	2U	0.1195	102.78
TP40763	2U	0.1195	102.78
TP38532	2U	0.1244	102.78
TP17458	2U	0.1452	102.78
TP30637	2U	0.1522	102.78
TP45163	2U	0.1522	102.78
TP36793	2U	0.1543	102.78
TP32254	2U	0.1574	102.78
TP37056	2U	0.1683	102.78
TP37258	2U	0.1683	102.78
TP9779	2U	0.1683	102.78
TP11570	2U	0.1729	102.78
TP33696	2U	0.1991	102.78
TP39268	2U	0.2958	102.78
TP5795	2U	0.4365	103.12
TP35357	2U	0.0065	104
TP35720	2U	0.5268	104
TP40766	2U	0.623	104
TP21351	2U	0.3691	104.53
TP24710	2U	0.3121	105.53
TP26411	2U	0.0118	111.06
TP1654	2U	0.0001	120.45
TP3319	2U	0.0003	121.12
TP22314	2U	0.0005	121.45
TP18184	2U	0.0012	122.19
TP35369	2U	0.0028	122.19
TP3870	2U	0.0023	122.53
TP21486	2U	0.0052	123.2
TP40205	2U	0.0052	123.2
TP44258	2U	0.0186	123.53
TP32353	2U	0.0255	123.87
TP21011	2U	0.0799	125.5
TP2684	2U	0.2958	128.2
TP18725	2U	0.1672	129.01
TP14020	2U	0.2339	129.75
TP44019	2U	0.3184	129.75
TP35444	2U	0.3338	129.75
TP32602	2U	0.1717	130.48
TP23914	2U	0.0732	131.16
TP27581	3U	0	0
TP2550	3U	0	2.33
TP39569	3U	0.0002	2.33
TP20286	3U	0	5.4
TP13664	3U	0.0004	5.92
TP33656	3U	0	6.55
TP18477	3U	0	6.91
TP4445	3U	0	8.74
TP35987	3U	0.0079	8.74
TP3446	3U	0.1729	12.64
TP42981	3U	0.2958	13.31
TP31959	3U	0.2789	14.08
TP30435	3U	0.9638	16.54
TP9885	3U	0.5484	16.82
TP28703	3U	0.2978	18.35
TP37309	3U	0.4294	18.76
TP21937	3U	0.0799	19.83
TP19722	3U	0.2522	20.27
TP40356	3U	0.0107	20.9
TP11719	3U	0.0031	21.64
TP19504	3U	0.0046	21.64
TP243	3U	0.0052	21.64
TP43367	3U	0.0058	21.64
TP3518	3U	0.5329	23.81
TP4205	3U	0.4172	24.17
TP11981	3U	0.0001	24.53
TP38860	3U	0.0024	24.53
TP44670	3U	0.4172	24.53
TP41688	3U	0.4715	24.53
TP44537	3U	0.5329	24.53
TP18029	3U	0.4172	24.88
TP33817	3U	0.4172	24.88
TP44703	3U	0.4172	24.88
TP27066	3U	0.4784	24.88
TP14491	3U	0.5252	25.96
TP14364	3U	0.271	27.42
TP3282	3U	0.0027	27.54
TP37040	3U	0.271	29.97
TP39240	3U	0.3511	29.97
TP2971	3U	0.0496	30.36
TP23467	3U	0.0538	30.7
TP3212	3U	0.4784	31.05
TP12309	3U	0.0603	31.1
TP8648	3U	0.5767	31.41
TP19145	3U	0.5329	31.84
TP29559	3U	0.6198	31.84
TP6343	3U	0.6198	31.84
TP29548	3U	0.6287	31.84
TP41284	3U	0.6904	31.84
TP15895	3U	0.7004	33.07
TP5504	3U	0.7581	33.07
TP37004	3U	0.0142	33.15
TP38077	3U	0.0142	33.15
TP9980	3U	0.0319	33.15
TP25283	3U	0.4784	33.43
TP9148	3U	0.4818	33.43
TP2295	3U	0.4853	33.43
TP26738	3U	0.4853	33.43
TP35334	3U	0.5031	33.43
TP42210	3U	0.5252	33.43
TP10853	3U	0.5367	33.43
TP38090	3U	0.5406	33.43
TP38674	3U	0.5564	33.43
TP46166	3U	0.5564	33.43
TP5923	3U	0.5767	33.43
TP33324	3U	0.5893	33.43
TP6416	3U	0.5893	33.43
TP45906	3U	0.6756	33.43
TP22528	3U	0.6854	33.43
TP29954	3U	0.7581	33.43
TP36639	3U	0.8324	33.43
TP18036	3U	0.0239	33.49
TP10678	3U	0.0244	33.49
TP20503	3U	0.0244	33.49
TP5864	3U	0.0244	33.49
TP19568	3U	0.0259	33.49
TP3278	3U	0.0259	33.49
TP18495	3U	0.0282	33.49
TP42116	3U	0.0282	33.49
TP25084	3U	0.5406	33.49
TP38742	3U	0.5893	33.49
TP6966	3U	0.5893	33.49
TP7494	3U	0.5893	33.49
TP17673	3U	0.6805	33.49
TP26172	3U	0.6805	33.49
TP21958	3U	0.0136	33.79
TP10032	3U	0.022	33.79
TP32109	3U	0.022	33.79
TP32186	3U	0.022	33.79
TP3027	3U	0.03	33.79
TP16041	3U	0.5329	33.79
TP25837	3U	0.5524	33.79
TP43780	3U	0.5524	33.79
TP10313	3U	0.5893	33.79
TP11273	3U	0.5893	33.79
TP1505	3U	0.5893	33.79
TP25240	3U	0.5893	33.79
TP29569	3U	0.5893	33.79
TP30234	3U	0.5893	33.79
TP4857	3U	0.5893	33.79
TP14039	3U	0.6612	33.79
TP35011	3U	0.6756	33.79
TP41754	3U	0.6805	33.79
TP30247	3U	0.5067	33.85
TP5993	3U	0.5252	33.85
TP10492	3U	0.5524	33.85
TP252	3U	0.5524	33.85
TP29801	3U	0.5524	33.85
TP13744	3U	0.5767	33.85
TP24834	3U	0.5767	33.85
TP731	3U	0.5767	33.85
TP19836	3U	0.5406	34.21
TP30567	3U	0.5406	34.21
TP37762	3U	0.5406	34.21
TP27760	3U	0.6612	34.21
TP2500	3U	0.7472	34.21
TP34868	3U	0.7581	34.21
TP4365	3U	0.3562	34.57
TP9794	3U	0.6287	34.57
TP33544	3U	0.0323	34.93
TP30168	3U	0.3362	34.93
TP16866	3U	0.6198	34.93
TP4720	3U	0.6612	34.93
TP45176	3U	0.7004	34.93
TP10424	3U	0.7581	34.93
TP31415	3U	0.0902	35.67
TP7482	3U	0.3827	35.72
TP2576	3U	0.2789	36.1
TP20164	3U	0.3827	36.1
TP42051	3U	0.3996	36.1
TP35948	3U	0.1864	37.26
TP18086	3U	0.0958	37.42
TP12908	3U	0.1176	37.62
TP10082	3U	0.1811	37.62
TP30183	3U	0.0611	37.75
TP3255	3U	0.0387	38.09
TP5388	3U	0.0374	38.34
TP23451	3U	0.0408	38.34
TP922	3U	0.0955	38.34
TP33295	3U	0.0658	39.02
TP13092	3U	0.0908	39.02
TP39263	3U	0.1228	39.02
TP43604	3U	0.033	39.05
TP5767	3U	0.0632	39.05
TP2815	3U	0.0742	39.05
TP35319	3U	0.0742	39.05
TP5464	3U	0.0742	39.05
TP30916	3U	0.1193	39.05
TP3736	3U	0.0374	39.35
TP4307	3U	0.0742	39.35
TP31164	3U	0.0955	39.35
TP26688	3U	0.0711	39.41
TP29690	3U	0.1176	39.41
TP5151	3U	0.1176	39.41
TP20249	3U	0.1449	39.41
TP7693	3U	0.0681	39.71
TP33799	3U	0.0658	39.84
TP6470	3U	0.0941	40.07
TP40788	3U	0.0955	40.07
TP31821	3U	0.1143	40.43
TP13401	3U	0.1388	40.43
TP5583	3U	0.1428	40.43
TP32548	3U	0.1685	40.43
TP30770	3U	0.1329	40.79
TP6190	3U	0.1638	40.79
TP19215	3U	0.0561	41.58
TP7472	3U	0.0623	41.58
TP12020	3U	0.0629	41.58
TP4808	3U	0.0685	41.58
TP39387	3U	0.0742	41.58
TP3082	3U	0.0798	41.58
TP5765	3U	0.0908	41.99
TP32252	3U	0.1203	41.99
TP561	3U	0.0676	43.48
TP12824	3U	0.1244	43.53
TP28214	3U	0.0472	43.84
TP38895	3U	0.0472	43.84
TP30095	3U	0.0472	43.86
TP20213	3U	0.0866	43.86
TP14381	3U	0.0496	44.19
TP34421	3U	0.0896	44.19
TP24110	3U	0.0958	44.19
TP35516	3U	0.0958	44.19
TP18246	3U	0.1081	44.19
TP3571	3U	0.1081	44.19
TP13927	3U	0.0681	44.2
TP30778	3U	0.0742	44.2
TP21065	3U	0.1764	44.21
TP26490	3U	0.2518	44.89
TP8720	3U	0.2143	45.22
TP3925	3U	0.0199	47.8
TP9669	3U	0.2143	47.98
TP26327	3U	0.2899	47.98
TP33617	3U	0.2292	48.31
TP18591	3U	0.1938	49.65
TP43347	3U	0.0666	50.1
TP27293	3U	0.2292	50.28
TP13169	3U	0.2899	50.28
TP18481	3U	0.2899	50.28
TP38950	3U	0.2899	50.28
TP40599	3U	0.2899	50.28
TP19592	3U	0.3018	50.28
TP32954	3U	0.3018	50.28
TP30817	3U	0.3142	50.28
TP44920	3U	0.336	50.28
TP18350	3U	0.3475	50.28
TP33730	3U	0.0442	51.62
TP20088	3U	0.1938	51.62
TP31977	3U	0.1938	51.62
TP24153	3U	0.2129	51.62
TP5698	3U	0.2292	51.62
TP15986	3U	0.3059	51.62
TP6525	3U	0.3059	51.62
TP21640	3U	0.5984	51.62
TP32865	3U	0.653	51.62
TP4355	3U	0.6618	51.62
TP7943	3U	0.4828	52.36
TP39626	3U	0.623	52.36
TP36371	3U	0.0525	52.41
TP21814	3U	0.0908	52.41
TP25722	3U	0.2729	52.63
TP42654	3U	0.2729	52.63
TP3392	3U	0.2978	52.63
TP22271	3U	0.3895	52.63
TP39218	3U	0.4454	52.63
TP31798	3U	0.4796	52.63
TP23478	3U	0.5448	52.63
TP27599	3U	0.5984	52.63
TP39212	3U	0.6798	52.63
TP5069	3U	0.5339	53.09
TP27773	3U	0.6753	53.09
TP13486	3U	0.4365	53.37
TP13438	3U	0.5905	54.04
TP18742	3U	0.4454	56.12
TP34258	3U	0.4454	56.12
TP18595	3U	0.3383	56.46
TP30703	3U	0.3947	56.46
TP1597	3U	0.4454	56.8
TP30238	3U	0.5634	57.47
TP9994	3U	0.5672	57.47
TP22515	3U	0.3869	57.8
TP29976	3U	0.4137	57.8
TP42955	3U	0.4959	58.14
TP42074	3U	0.4001	58.47
TP33756	3U	0.4926	62.37
TP18618	3U	0.7418	62.85
TP24506	3U	0.5984	64.19
TP20327	3U	0.0781	64.37
TP8727	3U	0.7222	64.86
TP5712	3U	0.4959	65.53
TP30728	3U	0.8541	67.62
TP40926	3U	0.8427	68.62
TP16512	3U	0.1202	69.14
TP25806	3U	0.1087	69.86
TP31710	3U	0.6753	70.7
TP1134	3U	0.7418	70.7
TP21788	3U	0.7418	70.7
TP5442	3U	0.7418	70.7
TP5895	3U	0.1264	72.09
TP32690	3U	0.5984	72.45
TP3780	3U	0.2975	72.81
TP35059	3U	0.3461	72.81
TP35043	3U	0.486	73.46
TP200	3U	0.4995	73.96
TP56	3U	0.3562	74.32
TP19770	3U	0.4083	74.32
TP27588	3U	0.4424	74.46
TP1667	3U	0.4083	75.04
TP38571	3U	0.4388	75.04
TP3121	3U	0.4853	75.04
TP43892	3U	0.3498	75.54
TP28327	3U	0.4993	75.54
TP37632	3U	0.4172	76.91
TP38896	3U	0.3562	77.63
TP40369	3U	0.5252	77.63
TP27943	3U	0.5339	78.22
TP26301	3U	0.2803	78.56
TP37355	3U	0.3152	78.71
TP34744	3U	0.4648	79.07
TP31245	3U	0.1024	79.57
TP37444	3U	0.1404	79.57
TP29945	3U	0.1595	79.57
TP5124	3U	0.4715	80.94
TP26328	3U	0.5252	80.94
TP25056	3U	0.3406	80.98
TP33055	3U	0.3792	80.98
TP7159	3U	0.3486	81.3
TP2823	3U	0.4784	82.02
TP4711	3U	0.4784	82.02
TP11708	3U	0.3691	82.32
TP26423	3U	0.5067	82.38
TP38711	3U	0.5329	82.74
TP24822	3U	0.6425	82.74
TP14118	3U	0.5329	83.89
TP41093	3U	0.2604	84.07
TP22240	3U	0.3059	84.07
TP29095	3U	0.3228	84.07
TP13339	3U	0.7581	84.61
TP39184	3U	0.0595	86.48
TP4959	3U	0.7004	86.48
TP11763	3U	0.7581	86.48
TP17051	3U	0.4263	86.84
TP25059	3U	0.7004	87.63
TP9615	3U	0.6708	87.99
TP26781	3U	0.086	88.23
TP4278	3U	0.1195	88.56
TP6418	3U	0.1195	88.56
TP4405	3U	0.1595	88.56
TP23351	3U	0.0239	88.9
TP30928	3U	0.3436	88.9
TP21805	3U	0.3129	90.58
TP1529	3U	0.0105	91.12
TP13746	3U	0.0374	91.12
TP41821	3U	0.0747	91.12
TP15623	3U	0.0855	91.12
TP148	3U	0.0977	91.12
TP6830	3U	0.1081	91.12
TP26124	3U	0.3152	91.12
TP13594	3U	0.3587	91.12
TP9267	3U	0.3855	91.92
TP37542	3U	0.0157	92.07
TP32018	3U	0.0146	94.22
TP24748	3U	0.0154	94.22
TP34859	3U	0.3129	94.22
TP45243	3U	0.3387	94.22
TP21027	3U	0.3461	94.22
TP15970	3U	0.3152	94.58
TP25102	3U	0.3152	94.58
TP336	3U	0.3387	94.58
TP4420	3U	0.3939	94.58
TP7785	3U	0.0232	95.44
TP13128	3U	0.0446	96.18
TP3469	3U	0.1156	96.62
TP24486	3U	0.1462	96.62
TP21569	3U	0.0534	97.36
TP39602	3U	0.0422	97.7
TP965	3U	0.0549	97.7
TP16874	3U	0.0815	97.7
TP19083	3U	0.0815	97.7
TP35675	3U	0.0971	97.7
TP37436	3U	0.0971	97.7
TP13666	3U	0.1024	98
TP4492	3U	0.1195	98
TP28127	3U	0.0374	98.03
TP31006	3U	0.0878	98.34
TP16819	3U	0.1482	98.34
TP988	3U	0.5252	98.76
TP7226	3U	0.0815	98.77
TP717	3U	0.0694	99.27
TP4546	3U	0.0689	99.48
TP33490	3U	0.5564	99.48
TP32150	3U	0.5685	99.48
TP32756	3U	0.5809	99.48
TP9427	3U	0.5979	99.48
TP44869	3U	0.6065	99.48
TP27033	3U	0.036	99.84
TP31070	3U	0.0575	99.84
TP16472	3U	0.1683	99.84
TP25821	3U	0.1683	99.84
TP46128	3U	0.2958	99.84
TP5964	3U	0.4172	99.84
TP44088	3U	0.4484	99.84
TP2925	3U	0.4959	99.84
TP397	3U	0.4995	99.84
TP31073	3U	0.6153	99.84
TP23280	3U	0.6756	99.84
TP36615	3U	0.6756	99.84
TP7698	3U	0.7054	99.84
TP28544	3U	0.4995	100.2
TP11874	3U	0.6109	100.2
TP3743	3U	0.6756	100.2
TP35490	3U	0.6904	100.2
TP30696	3U	0.7635	100.2
TP43210	3U	0.7802	100.2
TP37755	3U	0.7858	100.2
TP4194	3U	0.1729	100.48
TP12635	3U	0.3436	102.07
TP24221	3U	0.171	103.15
TP42950	3U	0.2107	103.51
TP39141	3U	0.4263	105.02
TP1078	3U	0.5979	105.02
TP25264	3U	0.803	105.81
TP45085	3U	0.8088	106.17
TP11973	3U	0.8754	107.32
TP1849	3U	0.8146	108.04
TP5239	3U	0.5851	110.28
TP42967	3U	0.6471	110.28
TP6147	3U	0.6471	110.28
TP11644	3U	0.6954	110.28
TP39118	3U	0.7105	110.28
TP41368	3U	0.6242	110.64
TP40450	4U	0.0339	0
TP18988	4U	0.114	0
TP43630	4U	0.0296	0.36
TP42514	4U	0.7078	3.16
TP38400	4U	0.6357	3.49
TP14166	4U	0.6486	3.83
TP5008	4U	0.7468	4.84
TP22238	4U	0.6486	6.18
TP8685	4U	0.5634	7.19
TP3012	4U	0.4669	7.86
TP5999	4U	0.6983	8.19
TP1273	4U	0.8315	9.34
TP36020	4U	0.8204	9.67
TP24658	4U	0.7173	10.35
TP4651	4U	0.7173	10.35
TP28234	4U	0.7222	10.35
TP18475	4U	0.623	10.68
TP12602	4U	0.6844	11.35
TP26623	4U	0.0374	15.25
TP41057	4U	0.0534	15.59
TP44029	4U	0.4828	43.11
TP43303	4U	0.4454	44.26
TP2151	4U	0.0522	45.74
TP16998	4U	0.0681	45.74
TP23887	4U	0.0681	45.74
TP25250	4U	0.0948	45.74
TP42321	4U	0.4395	48.23
TP3218	4U	0.571	48.23
TP37332	4U	0.0969	49.71
TP40735	4U	0.1026	51.94
TP31250	4U	0.1048	53.2
TP16750	4U	0.0533	53.38
TP6597	4U	0.0666	53.38
TP6790	4U	0.0701	53.38
TP32325	4U	0.1264	53.56
TP28428	4U	0.1368	53.56
TP22072	4U	0.1388	53.56
TP4430	4U	0.1603	53.56
TP18223	4U	0.3383	53.56
TP28337	4U	0.3383	53.56
TP19508	4U	0.0742	53.87
TP3357	4U	0.1079	53.87
TP11962	4U	0.1168	53.87
TP8945	4U	0.1301	53.87
TP8756	4U	0.1524	53.87
TP22263	4U	0.1698	53.87
TP23501	4U	0.3228	53.9
TP1910	4U	0.0643	54.23
TP34599	4U	0.099	54.23
TP21842	4U	0.3452	54.23
TP17226	4U	0.099	55.38
TP34574	4U	0.0681	56.96
TP34374	4U	0.0711	56.96
TP12807	4U	0.0721	56.96
TP23039	4U	0.0496	56.99
TP1148	4U	0.0433	57.32
TP18478	4U	0.0433	57.32
TP42930	4U	0.0433	57.32
TP36146	4U	0.0701	57.32
TP38051	4U	0.0701	57.32
TP5809	4U	0.0701	57.32
TP12831	4U	0.0815	57.32
TP16784	4U	0.0815	57.32
TP43571	4U	0.0815	57.32
TP45512	4U	0.0815	57.32
TP9804	4U	0.0934	57.32
TP21189	4U	0.1033	57.32
TP1873	4U	0.1064	57.32
TP29786	4U	0.2031	57.32
TP16642	4U	0.2277	57.32
TP25024	4U	0.2277	57.32
TP4876	4U	0.2277	57.32
TP6833	4U	0.2277	57.32
TP1640	4U	0.2841	57.32
TP41495	4U	0.3059	57.32
TP43506	4U	0.0475	57.35
TP30673	4U	0.0479	57.35
TP38148	4U	0.1849	57.52
TP1359	4U	0.2277	57.52
TP31999	4U	0.2277	57.52
TP45162	4U	0.2841	57.52
TP42937	4U	0.0914	57.61
TP41736	4U	0.1849	57.61
TP33798	4U	0.2101	57.61
TP18600	4U	0.2604	57.61
TP4296	4U	0.0676	57.64
TP22171	4U	0.0716	57.64
TP15100	4U	0.0629	57.68
TP28705	4U	0.0629	57.68
TP6918	4U	0.0629	57.68
TP44478	4U	0.1439	57.68
TP9802	4U	0.1439	57.68
TP20014	4U	0.0383	57.87
TP858	4U	0.0616	57.87
TP3627	4U	0.0472	58
TP4477	4U	0.0493	58
TP9174	4U	0.059	58
TP30467	4U	0.1522	58
TP1513	4U	0.1628	58
TP1428	4U	0.1951	58
TP7326	4U	0.0545	58.23
TP4303	4U	0.0553	58.23
TP38417	4U	0.2115	58.33
TP42349	4U	0.0955	58.59
TP9086	4U	0.0955	58.59
TP24395	4U	0.0394	58.95
TP17714	4U	0.0545	58.95
TP23302	4U	0.0545	58.95
TP3949	4U	0.0545	58.95
TP31258	4U	0.1095	59
TP26959	4U	0.0545	59.67
TP35905	4U	0.0545	59.67
TP28325	4U	0.0699	59.67
TP26737	4U	0.0815	59.67
TP3389	4U	0.0815	59.67
TP19134	4U	0.0969	59.67
TP21312	4U	0.0969	59.67
TP26946	4U	0.1974	59.67
TP3063	4U	0.2789	59.67
TP12837	4U	0.287	59.67
TP13685	4U	0.287	59.67
TP39672	4U	0.2912	59.67
TP40403	4U	0.3362	59.67
TP26872	4U	0.3486	59.67
TP28543	4U	0.3486	59.67
TP28601	4U	0.4581	59.67
TP27230	4U	0.132	61.72
TP13934	4U	0.1918	61.72
TP45735	4U	0.132	62.09
TP1445	4U	0.1329	62.09
TP33809	4U	0.1557	62.09
TP32822	4U	0.1824	62.09
TP30130	4U	0.3038	62.09
TP12687	4U	0.1176	62.43
TP3016	4U	0.1661	62.43
TP13651	4U	0.1824	62.43
TP19982	4U	0.1824	62.43
TP45770	4U	0.2486	62.43
TP36738	4U	0.287	63.15
TP38289	4U	0.3079	63.15
TP43862	4U	0.1574	64.23
TP10951	4U	0.3536	64.23
TP23874	4U	0.3536	65.74
TP6564	4U	0.3536	65.74
TP4286	4U	0.4113	65.74
TP22040	4U	0.086	66.98
TP26988	4U	0.3338	67.34
TP36030	4U	0.3486	67.34
TP26729	4U	0.1296	67.48
TP6844	4U	0.2398	67.7
TP13546	4U	0.1918	68.78
TP2036	4U	0.5339	69.36
TP20853	4U	0.6618	69.36
TP31458	4U	0.1974	69.5
TP36147	4U	0.4424	69.69
TP6988	4U	0.1946	70.22
TP16215	4U	0.4828	70.36
TP26024	4U	0.1388	70.58
TP12438	4U	0.3792	70.7
TP3891	4U	0.1661	70.94
TP19553	4U	0.2137	70.94
TP6926	4U	0.2789	72.38
TP18840	4U	0.3121	72.38
TP3375	4U	0.3593	72.38
TP27321	4U	0.3121	73.05
TP42472	4U	0.2954	73.46
TP27273	4U	0.1004	73.77
TP42839	4U	0.1088	73.77
TP31307	4U	0.1433	74.11
TP17711	4U	0.1661	74.54
TP13141	4U	0.1563	75.18
TP168	4U	0.1918	75.18
TP169	4U	0.2137	75.18
TP37596	4U	0.2137	75.18
TP15929	4U	0.2231	75.18
TP33971	4U	0.2231	75.18
TP6914	4U	0.2231	75.18
TP22520	4U	0.127	75.26
TP31039	4U	0.1918	75.26
TP42691	4U	0.1918	75.26
TP23613	4U	0.2604	75.6
TP42257	4U	0.0851	77.34
TP2489	4U	0.1414	77.34
TP37566	4U	0.1211	78.01
TP5613	4U	0.0977	78.35
TP12619	4U	0.1127	78.49
TP13375	4U	0.1211	78.49
TP30324	4U	0.1211	78.49
TP40756	4U	0.2172	79.02
TP18627	4U	0.158	80.36
TP21916	4U	0.158	80.36
TP25965	4U	0.158	80.36
TP37352	4U	0.158	80.36
TP25026	4U	0.1974	80.7
TP36689	4U	0.1974	80.7
TP29674	4U	0.2047	80.7
TP32699	4U	0.2347	80.7
TP14500	4U	0.3121	80.7
TP38861	4U	0.2047	81.31
TP3960	4U	0.1717	81.37
TP6936	4U	0.1877	81.37
TP949	4U	0.1481	81.66
TP21022	4U	0.1698	81.66
TP45836	4U	0.2468	81.7
TP18217	4U	0.2215	82.38
TP29463	4U	0.3613	82.38
TP32730	4U	0.2569	83.05
TP22235	4U	0.2675	83.05
TP29178	4U	0.1339	84.12
TP44966	4U	0.285	84.12
TP43153	4U	0.3174	84.12
TP29634	4U	0.0701	84.84
TP23284	4U	0.0706	84.84
TP21668	4U	0.0781	84.84
TP39422	4U	0.1176	84.84
TP43395	4U	0.0529	85.56
TP12997	4U	0.0701	85.56
TP44212	4U	0.0701	85.56
TP26771	4U	0.0786	85.56
TP1895	4U	0.0869	85.99
TP30092	4U	0.1481	85.99
TP29386	4U	0.1698	85.99
TP19605	4U	0.1798	85.99
TP41444	4U	0.0716	86.35
TP588	4U	0.099	86.35
TP43155	4U	0.1219	86.35
TP11845	4U	0.1329	86.35
TP14728	4U	0.1329	86.35
TP24905	4U	0.1329	86.35
TP27373	4U	0.1329	86.35
TP10336	4U	0.1388	86.35
TP8914	4U	0.1557	86.35
TP24076	4U	0.1568	86.35
TP2557	4U	0.1685	86.35
TP18306	4U	0.1798	86.35
TP46090	4U	0.2172	86.35
TP22977	4U	0.1193	87.07
TP42188	4U	0.1864	87.43
TP40393	4U	0.285	87.43
TP14038	4U	0.158	88.15
TP951	4U	0.158	88.15
TP18193	4U	0.0955	88.51
TP39347	4U	0.1246	88.51
TP11835	4U	0.1557	88.51
TP13188	4U	0.1557	88.51
TP23448	4U	0.1891	88.51
TP32608	4U	0.2231	88.51
TP5704	4U	0.4365	88.51
TP6225	4U	0.1228	88.87
TP30277	4U	0.1891	88.87
TP7633	4U	0.1388	90.38
TP43812	4U	0.1449	90.38
TP6482	4U	0.1449	90.38
TP5344	4U	0.233	90.38
TP14935	4U	0.1449	90.74
TP36495	4U	0.1918	90.74
TP7644	4U	0.271	90.74
TP5973	4U	0.0625	91.28
TP3989	4U	0.0676	91.28
TP361	4U	0.0851	91.28
TP16159	4U	0.0955	91.28
TP43896	4U	0.099	91.28
TP17040	4U	0.1176	91.28
TP1628	4U	0.1185	91.28
TP37106	4U	0.1185	91.28
TP23564	4U	0.1348	91.28
TP5263	4U	0.1368	91.28
TP12643	4U	0.1449	91.28
TP24617	4U	0.1449	91.28
TP3897	4U	0.1568	91.28
TP43451	4U	0.1568	91.28
TP23862	4U	0.158	91.28
TP14096	4U	0.1661	91.28
TP38661	4U	0.1661	91.28
TP543	4U	0.1824	91.28
TP11370	4U	0.1864	91.28
TP28469	4U	0.1974	91.28
TP38916	4U	0.1974	91.28
TP15908	4U	0.2018	91.28
TP16777	4U	0.2018	91.28
TP24192	4U	0.2018	91.28
TP41550	4U	0.2137	91.28
TP13798	4U	0.2347	91.28
TP25784	4U	0.2363	91.28
TP8559	4U	0.2398	91.28
TP14315	4U	0.2522	91.28
TP20705	4U	0.2671	91.28
TP20196	4U	0.3062	91.28
TP23031	4U	0.3362	91.28
TP36778	4U	0.4113	91.28
TP19287	4U	0.3792	91.56
TP7586	4U	0.1661	91.87
TP2427	4U	0.4054	93.31
TP10116	4U	0.4784	93.67
TP10117	4U	0.5329	93.67
TP11540	4U	0.5067	94.03
TP41939	4U	0.2671	95.54
TP12240	4U	0.271	95.54
TP16834	4U	0.4113	95.54
TP9457	4U	0.2231	95.9
TP45135	4U	0.287	96.26
TP2806	4U	0.3387	96.62
TP42824	4U	0.3486	96.62
TP17148	4U	0.3536	96.62
TP4614	4U	0.4113	96.62
TP5796	4U	0.3996	96.98
TP26846	4U	0.4172	96.98
TP30912	4U	0.4172	96.98
TP33197	4U	0.4172	96.98
TP43359	4U	0.4172	96.98
TP8431	4U	0.4451	96.98
TP26633	4U	0.4715	96.98
TP43187	4U	0.3486	97.7
TP43497	4U	0.4083	97.7
TP28813	4U	0.171	98.06
TP12999	4U	0.1449	98.85
TP13446	4U	0.2829	99.21
TP32122	4U	0.3197	99.21
TP42870	4U	0.1557	99.57
TP32662	4U	0.1974	99.57
TP74	4U	0.2031	99.91
TP34733	4U	0.2954	100.29
TP14644	4U	0.3486	100.29
TP37808	4U	0.3996	100.29
TP17535	4U	0.3486	100.65
TP349	4U	0.3486	101.73
TP37666	4U	0.529	103.6
TP22029	4U	0.1628	103.96
TP37829	4U	0.1695	103.96
TP2067	4U	0.3107	103.96
TP12555	4U	0.3244	103.96
TP11716	4U	0.3562	103.96
TP32858	4U	0.3639	103.96
TP13595	4U	0.4083	103.96
TP14065	4U	0.4083	103.96
TP22559	4U	0.4083	103.96
TP28236	4U	0.4083	103.96
TP31252	4U	0.4083	103.96
TP32999	4U	0.4083	103.96
TP37227	4U	0.4083	103.96
TP37399	4U	0.4083	103.96
TP39612	4U	0.4083	103.96
TP42574	4U	0.4083	103.96
TP43143	4U	0.4083	103.96
TP44392	4U	0.4083	103.96
TP29159	4U	0.4172	103.96
TP9809	4U	0.4388	103.96
TP16722	4U	0.4484	103.96
TP26725	4U	0.4484	103.96
TP12877	4U	0.4615	103.96
TP29251	4U	0.4749	103.96
TP34772	4U	0.4853	103.96
TP9692	4U	0.4995	103.96
TP29681	4U	0.5252	103.96
TP23129	4U	0.5564	103.96
TP11221	4U	0.5979	103.96
TP28432	4U	0.5979	103.96
TP7941	4U	0.6198	103.96
TP21688	4U	0.1522	104.29
TP27954	4U	0.4959	104.29
TP673	4U	0.4995	104.29
TP32152	4U	0.6425	104.29
TP36292	4U	0.6425	104.29
TP42714	4U	0.6425	104.29
TP38123	4U	0.6954	104.29
TP32268	4U	0.7054	104.29
TP14177	4U	0.1322	104.63
TP27568	4U	0.3267	105.3
TP20676	4U	0.3387	105.3
TP33872	4U	0.4172	105.3
TP18703	4U	0.514	105.3
TP16598	4U	0.2604	105.64
TP2001	4U	0.5524	106.55
TP12395	4U	0.4263	107.34
TP2888	4U	0.47	107.72
TP8090	4U	0.47	107.72
TP30899	4U	0.5767	108.49
TP30816	4U	0.4424	108.73
TP24569	4U	0.6425	108.85
TP5986	4U	0.5177	109.21
TP20654	4U	0.4959	109.57
TP27451	4U	0.5252	109.57
TP18596	4U	0.5564	109.57
TP43956	4U	0.6618	110.07
TP40806	4U	0.4995	111.08
TP854	4U	0.5252	111.08
TP31228	4U	0.6315	111.08
TP13439	4U	0.2789	111.26
TP40807	4U	0.2789	111.26
TP1059	4U	0.2954	111.26
TP38460	4U	0.3362	111.26
TP26472	4U	0.3436	111.26
TP44351	4U	0.3436	111.26
TP12714	4U	0.3613	111.26
TP16661	4U	0.3613	111.26
TP22211	4U	0.3855	111.26
TP30726	4U	0.4025	111.26
TP43851	4U	0.6315	111.75
TP18420	4U	0.5128	112.08
TP11905	4U	0.3613	112.42
TP1657	4U	0.3666	112.42
TP706	4U	0.5484	112.75
TP43036	4U	0.2247	113.93
TP18087	4U	0.38	113.93
TP21143	4U	0.7419	113.93
TP16405	4U	0.5233	114.43
TP44396	4U	0.1557	115.08
TP14912	4U	0.1661	115.08
TP6071	4U	0.171	115.08
TP18082	4U	0.1974	115.08
TP2615	4U	0.1048	115.1
TP40405	4U	0.1048	115.1
TP11932	4U	0.171	115.1
TP34749	4U	0.1329	115.44
TP28606	4U	0.171	115.44
TP13320	4U	0.4828	115.44
TP3521	4U	0.5233	115.44
TP23830	4U	0.4395	116.12
TP15245	4U	0.0711	116.52
TP9918	4U	0.0941	116.52
TP23839	4U	0.1557	116.88
TP41775	4U	0.1143	117.79
TP21192	4U	0.1837	117.79
TP580	4U	0.2107	118.15
TP37570	4U	0.2215	119.66
TP37661	4U	0.2347	119.66
TP18674	4U	0.2671	119.66
TP37890	4U	0.2671	119.66
TP1324	4U	0.4172	119.66
TP29012	4U	0.3387	120.02
TP3409	4U	0.38	120.02
TP2597	4U	0.3827	120.02
TP4744	4U	0.3827	120.02
TP9853	4U	0.3827	120.02
TP26421	4U	0.4172	120.02
TP34883	4U	0.4484	120.02
TP43589	4U	0.3436	120.38
TP7889	4U	0.38	120.38
TP41770	4U	0.2398	120.74
TP1517	4U	0.2954	120.74
TP16172	4U	0.2954	120.74
TP8658	4U	0.3666	120.74
TP13596	4U	0.2107	121.1
TP20864	4U	0.6147	121.35
TP45305	4U	0.5685	122.61
TP3697	4U	0.7222	122.82
TP28098	4U	0.9195	124.57
TP11345	4U	0.7157	124.92
TP6193	4U	0.8384	125.64
TP21929	4U	0.8945	126.35
TP41190	4U	0.9475	126.35
TP35399	4U	0.7468	127.05
TP17779	4U	0.7418	127.72
TP38910	4U	0.7004	129
TP7006	4U	0.8146	129.47
TP18471	4U	0.8598	130.14
TP1315	4U	0.7004	130.87
TP37251	4U	0.8445	130.87
TP45723	4U	0.7468	130.88
TP33070	4U	0.7472	131.59
TP33675	4U	0.7472	131.95
TP3420	4U	0.8205	131.95
TP27957	4U	0.9074	131.95
TP3242	4U	0.9339	131.95
TP30149	4U	0.6663	133.11
TP1735	4U	0.9681	133.11
TP10893	4U	0.9339	133.46
TP3610	4U	0.9543	133.65
TP16664	4U	0.5726	134.01
TP9964	4U	0.9407	134.01
TP4569	4U	0.7173	134.19
TP4570	4U	0.7173	134.19
TP34875	4U	0.9543	134.37
TP25832	4U	0.9893	134.37
TP26438	4U	0.9893	134.73
TP4759	4U	0.9822	135.09
TP34199	4U	0.8445	135.81
TP3140	4U	0.9475	135.81
TP14744	4U	0.9964	136.17
TP5805	4U	0.8315	137.83
TP4649	4U	0.9893	137.97
TP35281	4U	0.8598	138.5
TP38065	4U	0.9134	138.5
TP26255	4U	0.5984	138.83
TP25347	4U	0.5406	140.2
TP32594	4U	0.8952	140.31
TP28945	4U	0.7569	140.65
TP37461	4U	0.7222	141.38
TP3244	4U	0.9638	141.38
TP35826	4U	0.9638	141.38
TP44849	4U	0.9768	141.38
TP18483	4U	0.196	142.07
TP9478	4U	0.2347	142.07
TP30465	4U	0.4451	142.79
TP1233	4U	0.4784	142.79
TP25891	4U	0.4923	142.79
TP32022	4U	0.9257	143.53
TP11005	4U	0.8817	144.74
TP20425	4U	0.8832	144.94
TP36486	4U	0.8656	145.28
TP23259	4U	0.8773	145.61
TP22308	4U	0.1887	146.25
TP40304	4U	0.5984	146.25
TP743	4U	0.623	146.25
TP24423	4U	0.666	146.25
TP39455	4U	0.6708	146.25
TP35158	4U	0.6753	146.25
TP14905	4U	0.6844	146.25
TP21078	4U	0.7468	146.25
TP31105	4U	0.9543	146.25
TP22167	4U	0.7671	147.02
TP3854	4U	0.7173	147.36
TP13116	4U	0.7802	147.36
TP25349	4U	0.7827	147.36
TP18416	4U	0.8146	147.36
TP29493	4U	0.8146	147.36
TP37134	4U	0.8146	147.36
TP18415	4U	0.8371	147.36
TP16005	4U	0.5339	147.59
TP12251	4U	0.5984	147.59
TP42683	4U	0.4828	148.1
TP14514	4U	0.6612	149.27
TP41081	4U	0.6287	153.15
TP3383	5U	0	0
TP10195	5U	0	0.67
TP30661	5U	0.0001	1.34
TP5778	5U	0.0031	3.63
TP10212	5U	0.0038	3.97
TP22960	5U	0.0038	3.97
TP30534	5U	0.0069	3.97
TP4322	5U	0.0148	9.57
TP9916	5U	0.0057	11.59
TP17343	5U	0.7468	16.86
TP7495	5U	0.1322	22.78
TP18981	5U	0.5521	29.94
TP1453	5U	0.4669	31.08
TP2834	5U	0.3792	33.5
TP36103	5U	0.0666	33.97
TP4426	5U	0.4082	34.17
TP2813	5U	0.03	34.22
TP34005	5U	0.0354	34.22
TP16415	5U	0.2215	34.57
TP25319	5U	0.2215	34.57
TP25604	5U	0.2347	34.57
TP30717	5U	0.0442	34.58
TP15652	5U	0.411	34.85
TP18822	5U	0.0573	34.94
TP41203	5U	0.2168	35.41
TP28235	5U	0.2313	35.41
TP31780	5U	0.2398	35.77
TP1908	5U	0.245	35.77
TP4765	5U	0.0001	35.94
TP27178	5U	0.062	36.45
TP10890	5U	0.158	36.92
TP44715	5U	0.762	36.95
TP17299	5U	0.002	37.17
TP23787	5U	0.1798	37.24
TP33117	5U	0.131	37.28
TP39795	5U	0.1905	37.28
TP15807	5U	0.9703	37.44
TP39916	5U	0.486	37.67
TP2244	5U	0.5094	37.67
TP25506	5U	0.5094	37.67
TP18283	5U	0.0004	37.96
TP30841	5U	0.0007	37.96
TP35321	5U	0.0007	37.96
TP43635	5U	0.0007	37.96
TP26853	5U	0.0009	37.96
TP25449	5U	0.0011	37.96
TP13059	5U	0.0014	37.96
TP2540	5U	0.003	37.96
TP35956	5U	0.0031	37.96
TP19391	5U	0.0043	37.96
TP19832	5U	0.0061	37.96
TP6858	5U	0.0118	37.96
TP23035	5U	0.0403	37.96
TP26696	5U	0.0427	37.96
TP43759	5U	0.0446	37.96
TP17277	5U	0.0529	37.96
TP43474	5U	0.0529	37.96
TP19665	5U	0.0534	37.96
TP24232	5U	0.0534	37.96
TP8481	5U	0.0534	37.96
TP33688	5U	0.0645	37.96
TP40730	5U	0.0855	37.96
TP38772	5U	0.1103	37.96
TP7657	5U	0.1296	37.96
TP20830	5U	0.1408	37.96
TP44637	5U	0.1481	37.96
TP17151	5U	0.1491	37.96
TP43082	5U	0.1502	37.96
TP27446	5U	0.1568	37.96
TP42576	5U	0.1568	37.96
TP15520	5U	0.158	37.96
TP30575	5U	0.158	37.96
TP33338	5U	0.1685	37.96
TP9567	5U	0.1695	37.96
TP12102	5U	0.1698	37.96
TP28341	5U	0.1905	37.96
TP10398	5U	0.196	37.96
TP33075	5U	0.2047	37.96
TP13103	5U	0.2569	37.96
TP41647	5U	0.2803	37.96
TP1644	5U	0.2841	37.96
TP38637	5U	0.3163	37.96
TP9738	5U	0.3406	37.96
TP5880	5U	0.4028	37.96
TP18729	5U	0.4365	37.96
TP5133	5U	0.506	37.96
TP16841	5U	0.5521	37.96
TP40913	5U	0.5521	37.96
TP33112	5U	0.5944	37.96
TP1855	5U	0.6753	37.96
TP39595	5U	0.7569	37.96
TP14291	5U	0.762	37.96
TP30792	5U	0.7827	37.96
TP35868	5U	0.7827	37.96
TP11092	5U	0.8427	37.96
TP12565	5U	0.0768	38.32
TP20218	5U	0.0798	38.32
TP19600	5U	0.127	38.32
TP30960	5U	0.9134	38.45
TP23942	5U	0.7078	39.08
TP15500	5U	0.8484	39.08
TP19834	5U	0.0364	39.11
TP2243	5U	0.0468	39.11
TP36397	5U	0.6798	39.19
TP35962	5U	0.0009	39.46
TP5835	5U	0.0025	39.46
TP16459	5U	0.3142	39.46
TP45046	5U	0.9195	39.52
TP1773	5U	0.5198	39.82
TP14517	5U	0.0472	39.83
TP23870	5U	0.0472	39.83
TP39790	5U	0.6357	39.83
TP18484	5U	0.8371	39.83
TP3964	5U	0.8715	39.83
TP29438	5U	0.9638	39.83
TP5967	5U	0.4828	40.55
TP12037	5U	0.6189	40.55
TP43325	5U	0.4828	40.8
TP46155	5U	0.0364	41.27
TP24204	5U	0.0561	41.27
TP40558	5U	0.3475	41.29
TP2549	5U	0.3163	41.88
TP895	5U	0.411	41.96
TP10533	5U	0.025	41.99
TP5391	5U	0.5984	42.5
TP22000	5U	0.0112	42.61
TP15447	5U	0.1481	42.71
TP32712	5U	0.1568	42.71
TP38911	5U	0.1568	42.71
TP32354	5U	0.623	42.78
TP29908	5U	0.7468	42.78
TP37238	5U	0.5128	43.04
TP42390	5U	0.6618	43.04
TP26867	5U	0.762	43.04
TP38627	5U	0.059	43.07
TP4199	5U	0.1143	43.43
TP10642	5U	0.4669	43.5
TP34767	5U	0.0781	43.79
TP35689	5U	0.099	43.79
TP3827	5U	0.1033	43.79
TP12699	5U	0.1388	43.79
TP39512	5U	0.1388	43.79
TP33093	5U	0.158	43.79
TP3189	5U	0.1638	43.79
TP7735	5U	0.788	43.79
TP39333	5U	0.8259	43.79
TP38379	5U	0.8315	43.79
TP7492	5U	0.5944	43.84
TP22431	5U	0.6065	43.84
TP1860	5U	0.6147	43.84
TP6284	5U	0.6618	43.89
TP21527	5U	0.804	43.89
TP20203	5U	0.8773	43.89
TP38721	5U	0.8773	43.89
TP5178	5U	0.5905	44.51
TP11508	5U	0.6708	44.51
TP13102	5U	0.7827	44.51
TP11426	5U	0.5411	44.98
TP12560	5U	0.1388	45.3
TP26265	5U	0.1428	45.3
TP11366	5U	0.1449	45.3
TP16130	5U	0.1557	45.3
TP6786	5U	0.171	45.3
TP12563	5U	0.1811	45.3
TP14053	5U	0.1811	45.3
TP17233	5U	0.1811	45.3
TP18051	5U	0.1864	45.3
TP3144	5U	0.1864	45.3
TP39598	5U	0.1864	45.3
TP24417	5U	0.1891	45.3
TP25579	5U	0.1891	45.3
TP3338	5U	0.1891	45.3
TP2871	5U	0.2137	45.3
TP10756	5U	0.2363	45.3
TP19167	5U	0.2363	45.3
TP6453	5U	0.9134	45.3
TP5098	5U	0.9445	45.3
TP12529	5U	0.8094	45.38
TP28594	5U	0.8484	45.38
TP35836	5U	0.8598	45.38
TP26980	5U	0.8315	45.63
TP29516	5U	0.1193	45.66
TP18414	5U	0.158	45.66
TP17442	5U	0.1974	45.66
TP9648	5U	0.9195	45.71
TP1430	5U	0.1273	46.02
TP17236	5U	0.5524	46.37
TP14331	5U	0.1974	46.38
TP4444	5U	0.1974	46.38
TP43798	5U	0.7078	46.38
TP39700	5U	0.4165	46.46
TP41256	5U	0.4424	46.46
TP44626	5U	0.4424	46.46
TP3324	5U	0.5406	46.73
TP29076	5U	0.5634	47
TP1973	5U	0.5524	47.09
TP22010	5U	0.2323	47.33
TP29574	5U	0.4113	47.45
TP23946	5U	0.6443	47.74
TP26579	5U	0.5984	48.07
TP12556	5U	0.6025	48.07
TP24821	5U	0.6025	48.07
TP11086	5U	0.6618	48.07
TP31824	5U	0.285	48.61
TP41488	5U	0.3387	48.61
TP19683	5U	0.3939	48.61
TP3141	5U	0.4054	48.61
TP38678	5U	0.4054	48.61
TP40508	5U	0.4054	48.61
TP38146	5U	0.6471	49.1
TP28187	5U	0.653	49.15
TP16796	5U	0.7222	49.48
TP1070	5U	0.0458	49.67
TP36988	5U	0.2518	50.05
TP16126	5U	0.2693	50.05
TP6711	5U	0.2841	50.05
TP43184	5U	0.2978	50.05
TP1623	5U	0.3244	50.05
TP18074	5U	0.3314	50.05
TP18733	5U	0.3387	50.05
TP34381	5U	0.3486	50.05
TP42444	5U	0.3562	50.05
TP4504	5U	0.3773	50.05
TP4367	5U	0.3939	50.05
TP39800	5U	0.3974	50.05
TP39173	5U	0.4025	50.05
TP18426	5U	0.4054	50.05
TP37958	5U	0.4054	50.05
TP43999	5U	0.4054	50.05
TP14159	5U	0.4365	50.05
TP2194	5U	0.4514	50.05
TP26389	5U	0.4749	50.05
TP11642	5U	0.4784	50.05
TP27382	5U	0.5094	50.05
TP26375	5U	0.5339	50.05
TP26401	5U	0.5521	50.05
TP792	5U	0.623	50.05
TP19368	5U	0.6756	50.05
TP28696	5U	0.6756	50.05
TP5364	5U	0.6756	50.05
TP22189	5U	0.7004	50.05
TP35983	5U	0.7054	50.05
TP43771	5U	0.7054	50.05
TP7431	5U	0.7054	50.05
TP46150	5U	0.7078	50.05
TP39296	5U	0.762	50.05
TP21035	5U	0.7987	50.05
TP20947	5U	0.8773	50.05
TP18169	5U	0.8832	50.15
TP33053	5U	0.3314	50.26
TP5423	5U	0.5103	50.26
TP26674	5U	0.0991	50.41
TP23989	5U	0.4784	50.62
TP6488	5U	0.4784	50.62
TP7627	5U	0.4784	50.62
TP34843	5U	0.7802	50.77
TP11125	5U	0.0773	50.81
TP41246	5U	0.1103	50.81
TP43627	5U	0.8484	51.23
TP35869	5U	0.6565	51.33
TP44792	5U	0.2535	51.48
TP4997	5U	0.2803	51.48
TP28348	5U	0.5031	51.48
TP14795	5U	0.5893	51.48
TP41063	5U	0.6756	51.48
TP27861	5U	0.7054	51.48
TP7552	5U	0.7054	51.48
TP31209	5U	0.6287	52.2
TP22207	5U	0.9195	52.3
TP29129	5U	0.9195	52.3
TP4709	5U	0.4388	52.49
TP45967	5U	0.4549	52.85
TP6690	5U	0.5944	52.97
TP4025	5U	0.6708	52.97
TP2444	5U	0.6753	52.97
TP36089	5U	0.8656	52.97
TP22647	5U	0.8715	52.97
TP11823	5U	0.9638	52.97
TP13819	5U	0.9966	52.97
TP2915	5U	0.9966	52.97
TP29779	5U	0.9966	52.97
TP31687	5U	0.9966	52.97
TP371	5U	0.9966	52.97
TP6003	5U	0.9703	53.31
TP20856	5U	0.6612	53.64
TP40956	5U	0.7581	53.64
TP14978	5U	0.9012	53.98
TP39806	5U	0.9134	53.98
TP7851	5U	0.9445	53.98
TP22741	5U	0.4888	54
TP7986	5U	0.114	54.03
TP39360	5U	0.7468	54.32
TP1733	5U	0.9638	54.32
TP13395	5U	0.9834	54.32
TP16643	5U	0.9966	54.32
TP32040	5U	0.9966	54.32
TP37297	5U	0.9966	54.32
TP45823	5U	0.9966	54.32
TP30634	5U	0.0336	54.36
TP26482	5U	0.0411	54.36
TP32107	5U	0.0799	54.36
TP40701	5U	0.0872	54.36
TP24749	5U	0.1304	54.36
TP5599	5U	0.5103	54.36
TP44176	5U	0.7972	54.36
TP32654	5U	0.8629	54.36
TP39726	5U	0.8629	54.36
TP10237	5U	0.9638	54.65
TP45004	5U	0.9638	54.65
TP2080	5U	0.4749	54.72
TP13946	5U	0.5215	54.72
TP18664	5U	0.5406	54.72
TP12342	5U	0.5936	54.72
TP40095	5U	0.0268	54.79
TP4730	5U	0.6272	54.99
TP6653	5U	0.2789	55.04
TP8967	5U	0.2789	55.04
TP12867	5U	0.2975	55.4
TP8639	5U	0.3746	55.51
TP28133	5U	0.233	55.9
TP29005	5U	0.2769	55.9
TP16419	5U	0.0645	55.94
TP21184	5U	0.1143	56.05
TP42699	5U	0.4172	56.33
TP13572	5U	0.1179	56.61
TP37658	5U	0.3387	56.62
TP14317	5U	0.3719	56.62
TP20077	5U	0.4749	56.62
TP23882	5U	0.3152	57.2
TP25385	5U	0.2086	57.34
TP9816	5U	0.0573	57.56
TP30153	5U	0.1481	57.56
TP7064	5U	0.3129	57.99
TP35086	5U	0.8892	58.01
TP1661	5U	0.1168	58.35
TP18128	5U	0.1439	58.35
TP12049	5U	0.1524	58.35
TP4527	5U	0.1557	58.35
TP28368	5U	0.1626	58.35
TP9666	5U	0.176	58.35
TP17474	5U	0.1772	58.35
TP20070	5U	0.1891	58.35
TP230	5U	0.1891	58.35
TP38909	5U	0.1891	58.35
TP1380	5U	0.1905	58.35
TP11729	5U	0.1938	58.35
TP5677	5U	0.1974	58.35
TP2264	5U	0.1991	58.35
TP8917	5U	0.2003	58.35
TP38310	5U	0.2107	58.35
TP39470	5U	0.2398	58.35
TP12321	5U	0.2468	58.35
TP23352	5U	0.2486	58.35
TP39460	5U	0.2486	58.35
TP43138	5U	0.2486	58.35
TP6069	5U	0.2486	58.35
TP30863	5U	0.2569	58.35
TP28109	5U	0.2729	58.35
TP20783	5U	0.2958	58.35
TP26588	5U	0.3271	58.35
TP25078	5U	0.8204	58.68
TP1659	5U	0.0645	59.4
TP39072	5U	0.1358	59.57
TP39086	5U	0.4796	60.02
TP22529	5U	0.6753	60.36
TP24412	5U	0.0676	61.21
TP19158	5U	0.304	61.45
TP1561	5U	0.6618	61.77
TP39893	5U	0.2168	61.81
TP9917	5U	0.0244	62.96
TP11653	5U	0.0259	62.96
TP28852	5U	0.1626	62.96
TP41309	5U	0.1661	62.96
TP22790	5U	0.1837	62.96
TP4411	5U	0.245	62.96
TP18337	5U	0.1301	63.39
TP29439	5U	0.2954	64.61
TP5361	5U	0.2168	64.97
TP39083	5U	0.2296	64.97
TP39120	5U	0.2918	65
TP12743	5U	0.3383	65
TP12158	5U	0.3428	65
TP20095	5U	0.3691	65
TP6395	5U	0.4165	65
TP8660	5U	0.4669	65
TP23945	5U	0.4796	65
TP46232	5U	0.5128	65
TP36688	5U	0.5521	65
TP37418	5U	0.5521	65
TP19730	5U	0.5905	65
TP17849	5U	0.5984	65
TP9933	5U	0.6198	65
TP43564	5U	0.6272	65
TP2163	5U	0.7004	65
TP14673	5U	0.7472	65
TP2858	5U	0.2264	65.33
TP6435	5U	0.3197	65.69
TP11774	5U	0.2199	66.05
TP3667	5U	0.2231	66.05
TP38578	5U	0.2558	66.05
TP28827	5U	0.2789	66.05
TP41610	5U	0.2789	66.05
TP1917	5U	0.2829	66.05
TP27583	5U	0.3436	66.05
TP28809	5U	0.3436	66.05
TP29404	5U	0.3436	66.05
TP9262	5U	0.4749	66.05
TP33118	5U	0.5103	66.08
TP22707	5U	0.5252	66.08
TP12614	5U	0.5329	66.08
TP38240	5U	0.5685	66.08
TP38373	5U	0.5685	66.08
TP2492	5U	0.1472	66.12
TP6302	5U	0.1874	66.12
TP28646	5U	0.0671	66.44
TP45064	5U	0.3996	66.44
TP12666	5U	0.0398	66.46
TP35298	5U	0.0645	66.46
TP33990	5U	0.0742	66.46
TP28616	5U	0.0843	66.79
TP26326	5U	0.1024	66.79
TP42721	5U	0.0458	66.8
TP27428	5U	0.0676	66.8
TP13792	5U	0.4172	66.8
TP975	5U	0.4715	66.8
TP44253	5U	0.4853	66.8
TP15011	5U	0.5564	66.8
TP15150	5U	0.5564	66.8
TP34666	5U	0.5564	66.8
TP3884	5U	0.5564	66.8
TP43541	5U	0.5564	66.8
TP44928	5U	0.5564	66.8
TP34303	5U	0.6109	66.8
TP44401	5U	0.6109	66.8
TP25479	5U	0.6198	66.8
TP36164	5U	0.6287	66.8
TP4317	5U	0.6287	66.8
TP12291	5U	0.6954	66.8
TP35843	5U	0.7004	66.8
TP20233	5U	0.0645	67.13
TP8466	5U	0.4172	67.13
TP33190	5U	0.5564	67.16
TP33914	5U	0.4451	132.78
TP30499	5U	0.4451	134.01
TP14362	5U	0.2247	135.88
TP7176	5U	0.1156	179.08
TP19180	5U	0.2045	179.42
TP7922	5U	0.2045	179.42
TP40615	5U	0.2657	179.42
TP32568	5U	0.0815	180.42
TP21537	5U	0.0372	181.09
TP24042	6U	0.1811	0
TP26659	6U	0.2522	1.51
TP34750	6U	0.4923	1.51
TP16366	6U	0.4959	1.51
TP29256	6U	0.4959	1.51
TP45196	6U	0.4959	1.51
TP12841	6U	0.0928	8.61
TP22705	6U	0.0282	14.1
TP43735	6U	0.5252	14.98
TP7676	6U	0.4995	15.34
TP21866	6U	0.0552	15.65
TP22108	6U	0.3486	16.21
TP20086	6U	0.1164	17.37
TP33041	6U	0.9681	18.88
TP3320	6U	0.8629	20.32
TP11529	6U	0.7987	21.07
TP35897	6U	0.5984	21.4
TP34725	6U	0.8567	21.4
TP34562	6U	0.8754	21.4
TP18573	6U	0.8427	21.88
TP22097	6U	0.7987	22.76
TP15054	6U	0.8754	22.84
TP17300	6U	0.9339	24.27
TP13648	6U	0.8259	24.58
TP29152	6U	0.0534	31.15
TP23765	6U	0.8754	31.51
TP27979	6U	0.8881	31.51
TP23502	6U	0.8817	33.39
TP43018	6U	0.8094	36.16
TP14807	6U	0.6425	37.47
TP12690	6U	0.8324	37.47
TP29084	6U	0.9195	38.05
TP25648	6U	0.9768	38.05
TP29902	6U	0.6198	38.55
TP26046	6U	0.9195	39.06
TP23291	6U	0.6198	39.27
TP41684	6U	0.8952	41.14
TP40678	6U	0.6357	42.62
TP11277	6U	0.7222	42.62
TP18377	6U	0.9339	42.81
TP25046	6U	0.9612	42.81
TP46013	6U	0.8384	43.17
TP26018	6U	0.8315	43.29
TP19457	6U	0.9893	43.89
TP44885	6U	0.9612	43.96
TP36315	6U	0.6618	44.97
TP7318	6U	0.9612	44.97
TP39862	6U	0.6272	46.78
TP45855	6U	0.6147	47.86
TP21606	6U	0.6315	48.19
TP1516	6U	0.8324	49.15
TP38892	6U	0.8754	49.51
TP5802	6U	0.6486	49.67
TP26586	6U	0.8754	49.87
TP7427	6U	0.5905	52.1
TP15856	6U	0.7858	52.1
TP29471	6U	0.8205	52.82
TP9670	6U	0.9074	52.82
TP1481	6U	0.7054	53.18
TP14783	6U	0.7581	53.18
TP14685	6U	0.7858	53.54
TP39904	6U	0.8324	53.54
TP7139	6U	0.8324	53.54
TP14658	6U	0.9822	55.77
TP16792	6U	0.9893	55.77
TP24265	6U	0.9893	55.77
TP6030	6U	0.803	56.56
TP39479	6U	0.8945	56.92
TP7003	6U	0.6904	58
TP42770	6U	0.7157	58
TP45529	6U	0.6315	58.31
TP31463	6U	0.9272	58.36
TP37855	6U	0.7173	60.8
TP6300	6U	0.7173	60.8
TP11741	6U	0.7518	60.8
TP32550	6U	0.9272	60.8
TP33386	6U	0.7313	61.2
TP5372	6U	0.9339	61.2
TP17531	6U	0.9681	61.2
TP25108	6U	0.9681	61.2
TP26532	6U	0.9681	61.2
TP38654	6U	0.9681	61.2
TP35966	6U	0.9475	61.56
TP38320	6U	0.9206	62.72
TP4081	6U	0.9543	62.72
TP11220	6U	0.9612	62.72
TP38980	6U	0.9612	62.72
TP3852	6U	0.4828	62.75
TP5946	6U	0.5128	62.75
TP39490	6U	0.5748	62.75
TP32303	6U	0.7972	63.15
TP34260	6U	0.7972	63.15
TP38882	6U	0.6425	63.87
TP41718	6U	0.8817	63.87
TP31202	6U	0.9074	63.87
TP24036	6U	0.5521	64.23
TP25340	6U	0.5521	64.23
TP19077	6U	0.7105	64.23
TP10011	6U	0.7858	64.23
TP16817	6U	0.7858	64.23
TP3245	6U	0.7858	64.23
TP33721	6U	0.7972	64.23
TP10880	6U	0.803	64.23
TP31018	6U	0.8506	64.23
TP45871	6U	0.8881	64.23
TP13415	6U	0.9074	64.23
[truncated: 1,011 more rows]

## Sheet: 5K_syntenous_markers
Mapped markes from Ae. umbellulata high density map with best hit information in Chinese Spring wheat assembly.
id	Chr	Consensus.cM	subject_id	identity	alignment_length	mismatches	gap_opens	q.start	q.end	s.start	s.end	evalue	bitscore
TP9663	1U	0	chr1D	100	64	0	0	1	64	434378	434441	6e-25	119
TP28990	1U	0.1	chr1D	100	64	0	0	1	64	355858	355921	6e-25	119
TP18365	1U	0.74	chr1A	92.45	53	4	0	2	54	544921681	544921733	4e-12	76.8
TP10417	1U	2.75	chr1B	98.44	64	1	0	1	64	1430737	1430674	3e-23	113
TP27181	1U	2.95	chr1B	100	58	0	0	1	58	1533913	1533970	1e-21	108
TP24840	1U	3.09	chr1A	96.88	64	2	0	1	64	2525750	2525687	1e-21	108
TP37062	1U	3.67	chr1A	100	51	0	0	1	51	1831822	1831772	1e-17	95.3
TP25789	1U	4.75	chr1D	96.88	64	2	0	1	64	2169239	2169302	1e-21	108
TP12036	1U	5.83	chr1A	98.44	64	1	0	1	64	1236273	1236336	3e-23	113
TP6797	1U	5.83	chr1B	96.88	64	2	0	1	64	5012080	5012143	1e-21	108
TP3493	1U	6.91	chr1A	96.77	62	2	0	1	62	57929693	57929754	2e-20	104
TP31067	1U	7.32	chr1A	98.39	62	1	0	1	62	6090056	6090117	4e-22	110
TP11364	1U	8.32	chr1D	100	64	0	0	1	64	3381577	3381640	6e-25	119
TP29609	1U	8.32	chr1B	100	54	0	0	1	54	633012830	633012883	2e-19	100
TP42419	1U	9.5	chr1A	96.88	64	2	0	1	64	6136847	6136784	1e-21	108
TP8670	1U	10.22	chr1D	92.59	54	4	0	1	54	472342674	472342727	1e-12	78.7
TP1133	1U	11.01	chr1B	93.75	64	4	0	1	64	8043201	8043264	3e-18	97.1
TP36346	1U	11.37	chr1D	100	64	0	0	1	64	5348507	5348444	6e-25	119
TP20527	1U	11.73	chr1B	100	52	0	0	6	57	8063175	8063226	3e-18	97.1
TP29741	1U	14.97	chr1A	98.39	62	1	0	3	64	9339294	9339355	4e-22	110
TP5375	1U	17.78	chr1D	90	70	1	3	1	64	7215152	7215083	6e-15	86.1
TP28577	1U	18.93	chr1B	98.44	64	1	0	1	64	9493177	9493114	3e-23	113
TP39908	1U	18.93	chr1A	100	64	0	0	1	64	8233086	8233149	6e-25	119
TP43513	1U	18.93	chr1D	95.31	64	3	0	1	64	6990658	6990595	6e-20	102
TP8328	1U	18.93	chr1A	96.88	64	2	0	1	64	8350342	8350279	1e-21	108
TP31732	1U	19.29	chr1D	96.72	61	2	0	4	64	7354023	7353963	6e-20	102
TP5737	1U	20.35	chr1D	96.88	64	2	0	1	64	8463887	8463824	1e-21	108
TP14812	1U	22.64	chr1D	100	52	0	0	1	52	9351456	9351405	3e-18	97.1
TP40295	1U	24.66	chr1B	90.16	61	1	1	1	61	13369002	13369057	1e-11	75
TP3752	1U	25.74	chr1D	95.16	62	3	0	3	64	9087949	9088010	8e-19	99
TP3778	1U	25.74	chr1D	92.75	69	0	2	1	64	9400653	9400721	1e-17	95.3
TP3260	1U	26.74	chr1A	98.36	61	1	0	1	61	10956180	10956240	1e-21	108
TP38789	1U	26.74	chr1B	95.31	64	3	0	1	64	19593067	19593130	6e-20	102
TP12804	1U	28.91	chr1A	98.44	64	1	0	1	64	13562932	13562869	3e-23	113
TP32604	1U	28.91	chr1A	98.39	62	1	0	1	62	14587687	14587626	4e-22	110
TP5545	1U	28.91	chr1A	98.18	55	1	0	1	55	13861238	13861184	3e-18	97.1
TP5703	1U	28.91	chr1A	97.92	48	1	0	1	48	15141215	15141262	2e-14	84.2
TP17007	1U	29.99	chr1A	100	64	0	0	1	64	7573806	7573743	6e-25	119
TP23243	1U	31.53	chr1A	98.44	64	1	0	1	64	16242931	16242994	3e-23	113
TP26323	1U	31.53	chr1D	96.88	64	0	2	1	64	16822359	16822420	5e-21	106
TP3748	1U	31.53	chr1D	98.44	64	1	0	1	64	16769172	16769235	3e-23	113
TP6532	1U	31.53	chr1D	93.44	61	3	1	1	61	15335268	15335327	5e-16	89.8
TP18579	1U	32.94	chr1A	90.48	63	1	2	2	64	16725419	16725476	1e-12	78.7
TP25708	1U	32.94	chr1A	100	48	0	0	17	64	32959106	32959059	5e-16	89.8
TP41179	1U	32.94	chr1B	98.44	64	1	0	1	64	16129142	16129205	3e-23	113
TP20140	1U	35.64	chr1A	96.88	64	2	0	1	64	21579125	21579062	1e-21	108
TP18316	1U	36.98	chr1B	96.55	58	2	0	1	58	32411296	32411239	3e-18	97.1
TP36979	1U	36.98	chr1D	98.18	55	1	0	1	55	20873207	20873261	3e-18	97.1
TP11252	1U	41.07	chr1A	100	64	0	0	1	64	24154911	24154974	6e-25	119
TP2766	1U	44.65	chr1A	98.44	64	1	0	1	64	24138798	24138861	3e-23	113
TP36482	1U	48.81	chr1B	100	54	0	0	1	54	46788296	46788349	2e-19	100
TP8433	1U	49.81	chr1D	95.31	64	3	0	1	64	29925042	29924979	6e-20	102
TP16235	1U	50.81	chr1B	97.22	36	1	0	10	45	43993052	43993017	1e-07	62.1
TP10548	1U	50.89	chr1A	95.08	61	3	0	4	64	487814529	487814469	3e-18	97.1
TP1128	1U	50.89	chr1D	98.44	64	0	1	1	64	379500431	379500369	1e-22	111
TP12209	1U	50.89	chr1D	100	46	0	0	19	64	366191291	366191336	6e-15	86.1
TP13055	1U	50.89	chr1B	97.67	43	1	0	1	43	52764388	52764346	1e-11	75
TP13388	1U	50.89	chr1D	100	64	0	0	1	64	398560671	398560734	6e-25	119
TP14623	1U	50.89	chr1D	98.44	64	1	0	1	64	397285681	397285744	3e-23	113
TP15315	1U	50.89	chr1D	97.62	42	1	0	1	42	345264498	345264457	5e-11	73.1
TP15485	1U	50.89	chr1D	100	64	0	0	1	64	365082416	365082479	6e-25	119
TP17131	1U	50.89	chr1A	98.44	64	1	0	1	64	396021456	396021393	3e-23	113
TP18935	1U	50.89	chr1D	100	64	0	0	1	64	39951145	39951208	6e-25	119
TP20574	1U	50.89	chr1B	100	64	0	0	1	64	170744247	170744184	6e-25	119
TP21036	1U	50.89	chr1A	100	64	0	0	1	64	494398919	494398856	6e-25	119
TP21746	1U	50.89	chr1D	100	62	0	0	1	62	255706199	255706260	8e-24	115
TP22608	1U	50.89	chr1D	100	64	0	0	1	64	327721301	327721238	6e-25	119
TP23040	1U	50.89	chr1D	100	30	0	0	35	64	359666645	359666616	5e-06	56.5
TP23371	1U	50.89	chr1A	100	64	0	0	1	64	495667849	495667786	6e-25	119
TP24007	1U	50.89	chr1D	98.44	64	1	0	1	64	66381522	66381585	3e-23	113
TP2413	1U	50.89	chr1B	96.88	64	2	0	1	64	480752174	480752111	1e-21	108
TP2456	1U	50.89	chr1D	98.25	57	1	0	1	57	354509276	354509332	2e-19	100
TP24736	1U	50.89	chr1A	98.25	57	1	0	1	57	488877619	488877563	2e-19	100
TP25455	1U	50.89	chr1A	98.41	63	1	0	1	63	443731915	443731853	1e-22	111
TP257	1U	50.89	chr1D	95.31	64	3	0	1	64	345267032	345267095	6e-20	102
TP26476	1U	50.89	chr1D	98.44	64	1	0	1	64	76802574	76802511	3e-23	113
TP26763	1U	50.89	chr1B	100	64	0	0	1	64	66814006	66813943	6e-25	119
TP27029	1U	50.89	chr1A	100	62	0	0	1	62	505076800	505076861	8e-24	115
TP27120	1U	50.89	chr1D	98.44	64	1	0	1	64	80650951	80650888	3e-23	113
TP27154	1U	50.89	chr1B	96.36	55	2	0	1	55	61683267	61683321	1e-16	91.6
TP27366	1U	50.89	chr1B	95.16	62	3	0	3	64	336154207	336154146	8e-19	99
TP27664	1U	50.89	chr1B	96.88	64	2	0	1	64	396947332	396947269	1e-21	108
TP28274	1U	50.89	chr1B	98.44	64	1	0	1	64	144651073	144651010	3e-23	113
TP28282	1U	50.89	chr1B	100	64	0	0	1	64	53110989	53111052	6e-25	119
TP28558	1U	50.89	chr1D	96.77	62	2	0	3	64	33841162	33841223	2e-20	104
TP28685	1U	50.89	chr1B	100	64	0	0	1	64	444643686	444643749	6e-25	119
TP28764	1U	50.89	chr1A	100	64	0	0	1	64	42196627	42196564	6e-25	119
TP29081	1U	50.89	chr1D	100	42	0	0	1	42	386749780	386749821	1e-12	78.7
TP30305	1U	50.89	chr1A	100	50	0	0	1	50	314024465	314024514	4e-17	93.5
TP31645	1U	50.89	chr1D	100	64	0	0	1	64	84568748	84568811	6e-25	119
TP31655	1U	50.89	chr1B	89.06	64	7	0	1	64	69039135	69039198	3e-13	80.5
TP31841	1U	50.89	chr1D	100	64	0	0	1	64	49956532	49956469	6e-25	119
TP31899	1U	50.89	chr1A	96.88	64	2	0	1	64	446715132	446715069	1e-21	108
TP32214	1U	50.89	chr1A	95.24	63	2	1	1	62	480142019	480141957	8e-19	99
TP32301	1U	50.89	chr1B	98.44	64	0	1	1	64	95062053	95061991	1e-22	111
TP32473	1U	50.89	chr1B	100	64	0	0	1	64	512901368	512901305	6e-25	119
TP3467	1U	50.89	chr1D	98.44	64	1	0	1	64	252292227	252292290	3e-23	113
TP34840	1U	50.89	chr1B	98.44	64	1	0	1	64	74006406	74006469	3e-23	113
TP35365	1U	50.89	chr1B	98.44	64	1	0	1	64	396092616	396092679	3e-23	113
TP36633	1U	50.89	chr1A	98.44	64	1	0	1	64	38776197	38776260	3e-23	113
TP36766	1U	50.89	chr1A	95.74	47	2	0	2	48	488835649	488835603	4e-12	76.8
TP37312	1U	50.89	chr1A	100	42	0	0	1	42	369293268	369293227	1e-12	78.7
TP37419	1U	50.89	chr1B	96.88	64	2	0	1	64	74028666	74028729	1e-21	108
TP38569	1U	50.89	chr1D	96.88	64	1	1	1	64	134459289	134459227	5e-21	106
TP38595	1U	50.89	chr1B	94.23	52	2	1	3	54	430341561	430341611	1e-12	78.7
TP38620	1U	50.89	chr1A	100	64	0	0	1	64	397258259	397258196	6e-25	119
TP38685	1U	50.89	chr1A	98.44	64	1	0	1	64	446138669	446138732	3e-23	113
TP39187	1U	50.89	chr1D	100	64	0	0	1	64	360444832	360444769	6e-25	119
TP39203	1U	50.89	chr1B	98.44	64	1	0	1	64	137171733	137171670	3e-23	113
TP40770	1U	50.89	chr1D	100	64	0	0	1	64	325964174	325964237	6e-25	119
TP43757	1U	50.89	chr1A	96.72	61	2	0	1	61	38776465	38776525	6e-20	102
TP44058	1U	50.89	chr1A	98.33	60	1	0	4	63	39729387	39729328	5e-21	106
TP448	1U	50.89	chr1A	87.88	66	6	1	1	64	321008224	321008159	4e-12	76.8
TP4482	1U	50.89	chr1D	98.36	61	1	0	1	61	41720819	41720879	1e-21	108
TP45433	1U	50.89	chr1D	100	64	0	0	1	64	118511521	118511458	6e-25	119
TP45553	1U	50.89	chr1A	98.44	64	1	0	1	64	454618174	454618111	3e-23	113
TP45869	1U	50.89	chr1B	98.44	64	1	0	1	64	522186314	522186251	3e-23	113
TP4595	1U	50.89	chr1D	100	64	0	0	1	64	77010338	77010275	6e-25	119
TP4838	1U	50.89	chr1A	100	64	0	0	1	64	495638677	495638614	6e-25	119
TP5130	1U	50.89	chr1B	97.56	41	1	0	24	64	434622648	434622688	2e-10	71.3
TP623	1U	50.89	chr1D	100	62	0	0	3	64	41150466	41150527	8e-24	115
TP7675	1U	50.89	chr1D	96.61	59	2	0	1	59	319569770	319569712	8e-19	99
TP7728	1U	50.89	chr1D	100	64	0	0	1	64	400016805	400016868	6e-25	119
TP27231	1U	53.71	chr1B	90.62	64	0	2	1	64	51454085	51454142	3e-13	80.5
TP5067	1U	53.71	chr1D	100	64	0	0	1	64	36534124	36534187	6e-25	119
TP25070	1U	53.81	chr1D	95.31	64	3	0	1	64	28511898	28511961	6e-20	102
TP8365	1U	54.81	chr1B	100	64	0	0	1	64	43898421	43898484	6e-25	119
TP30664	1U	56.81	chr1B	100	64	0	0	1	64	50966904	50966967	6e-25	119
TP40323	1U	59.81	chr1D	95.31	64	3	0	1	64	28511901	28511838	6e-20	102
TP25788	1U	62	chr1D	100	48	0	0	1	48	439864402	439864449	5e-16	89.8
TP5235	1U	62	chr1D	100	40	0	0	25	64	440087358	440087319	1e-11	75
TP43414	1U	63.15	chr1A	96.88	64	2	0	1	64	534010127	534010190	1e-21	108
TP32272	1U	63.51	chr1A	98.44	64	1	0	1	64	538378000	538377937	3e-23	113
TP41753	1U	63.51	chr1B	100	64	0	0	1	64	593885619	593885682	6e-25	119
TP14185	1U	66.68	chr1B	100	37	0	0	1	37	590817637	590817601	7e-10	69.4
TP1385	1U	69.42	chr1A	100	64	0	0	1	64	531684748	531684811	6e-25	119
TP18447	1U	69.42	chr1B	100	64	0	0	1	64	585698431	585698368	6e-25	119
TP26697	1U	69.42	chr1D	100	64	0	0	1	64	433215403	433215466	6e-25	119
TP29583	1U	69.42	chr1B	96.88	64	2	0	1	64	581094714	581094651	1e-21	108
TP36886	1U	69.42	chr1D	98.44	64	1	0	1	64	436852470	436852533	3e-23	113
TP38410	1U	69.42	chr1D	96.88	64	2	0	1	64	433060603	433060666	1e-21	108
TP38454	1U	69.42	chr1A	98.44	64	0	1	1	64	532528650	532528712	1e-22	111
TP41377	1U	69.42	chr1B	100	64	0	0	1	64	584477171	584477108	6e-25	119
TP5919	1U	69.42	chr1D	98.44	64	1	0	1	64	433980661	433980598	3e-23	113
TP6033	1U	69.42	chr1D	90.62	64	2	1	1	64	435305119	435305060	8e-14	82.4
TP38110	2U	1.35	chr2A	100	57	0	0	1	57	1371873	1371817	5e-21	106
TP38421	2U	1.35	chr2A	96.83	63	2	0	2	64	1678986	1679048	5e-21	106
TP33896	2U	2.09	chr2B	93.75	48	3	0	1	48	10206	10159	5e-11	73.1
TP15120	2U	2.76	chr2B	96.88	64	2	0	1	64	9283049	9282986	1e-21	108
TP2708	2U	2.76	chr2D	100	64	0	0	1	64	21581	21518	6e-25	119
TP1752	2U	3.1	chr2D	94.23	52	1	2	15	64	76992540	76992591	1e-12	78.7
TP24398	2U	3.1	chr2B	100	64	0	0	1	64	11091460	11091523	6e-25	119
TP2975	2U	3.1	chr2A	96.88	64	2	0	1	64	1675980	1676043	1e-21	108
TP39315	2U	3.1	chr2A	86.15	65	2	5	4	64	34480952	34480891	3e-08	63.9
TP34533	2U	5.51	chr2A	95.31	64	3	0	1	64	2367183	2367246	6e-20	102
TP11650	2U	7.77	chr2D	100	64	0	0	1	64	2475395	2475332	6e-25	119
TP44904	2U	7.77	chr2B	98.44	64	1	0	1	64	7900889	7900952	3e-23	113
TP44075	2U	8.91	chr2A	96.55	58	2	0	4	61	5735044	5735101	3e-18	97.1
TP11108	2U	9.65	chr2D	100	64	0	0	1	64	5464777	5464714	6e-25	119
TP27621	2U	9.65	chr2A	96.88	64	2	0	1	64	5731668	5731731	1e-21	108
TP45053	2U	9.65	chr2A	96.88	64	2	0	1	64	2800725	2800662	1e-21	108
TP7707	2U	10.01	chr2A	98.36	61	1	0	1	61	5475434	5475494	1e-21	108
TP3096	2U	10.36	chr2A	100	53	0	0	1	53	5031434	5031486	8e-19	99
TP40278	2U	10.36	chr2D	95.52	67	0	1	1	64	5928145	5928079	2e-20	104
TP17619	2U	10.56	chr2B	100	53	0	0	1	53	7648615	7648667	8e-19	99
TP42764	2U	10.9	chr2D	100	57	0	0	1	57	3077305	3077361	5e-21	106
TP31205	2U	11.52	chr2B	100	64	0	0	1	64	1175022	1175085	6e-25	119
TP722	2U	11.88	chr2A	98.44	64	1	0	1	64	3825942	3826005	3e-23	113
TP12279	2U	12.24	chr2A	97.78	45	1	0	1	45	3577371	3577415	1e-12	78.7
TP33032	2U	12.24	chr2A	100	54	0	0	1	54	7329100	7329153	2e-19	100
TP26902	2U	12.95	chr2A	95.31	64	3	0	1	64	3577374	3577311	6e-20	102
TP45473	2U	12.95	chr2A	94.74	38	2	0	24	61	7691558	7691521	4e-07	60.2
TP27073	2U	13.32	chr2A	100	64	0	0	1	64	3708737	3708800	6e-25	119
TP45079	2U	13.32	chr2D	100	63	0	0	1	63	8479324	8479262	2e-24	117
TP31473	2U	13.65	chr2D	97.56	41	1	0	6	46	9737273	9737233	2e-10	71.3
TP35304	2U	13.65	chr2A	100	38	0	0	1	38	8015721	8015684	2e-10	71.3
TP41985	2U	13.65	chr2B	100	64	0	0	1	64	1321659	1321596	6e-25	119
TP8127	2U	13.65	chr2D	98.44	64	1	0	1	64	7120752	7120815	3e-23	113
TP9495	2U	13.65	chr2D	96.88	64	2	0	1	64	8170112	8170049	1e-21	108
TP25456	2U	14.03	chr2A	89.55	67	3	2	1	64	8015725	8015790	8e-14	82.4
TP17921	2U	14.39	chr2A	96.88	64	2	0	1	64	7745376	7745313	1e-21	108
TP35482	2U	16.4	chr2A	100	64	0	0	1	64	7836862	7836799	6e-25	119
TP8605	2U	17.42	chr2A	96.88	64	2	0	1	64	11543941	11544004	1e-21	108
TP42284	2U	18.21	chr2A	100	31	0	0	17	47	10315454	10315484	1e-06	58.4
TP45577	2U	18.21	chr2B	100	64	0	0	1	64	17933267	17933204	6e-25	119
TP5839	2U	18.64	chr2B	98.44	64	1	0	1	64	17490971	17491034	3e-23	113
TP40872	2U	19.22	chr2B	97.73	44	1	0	1	44	17934819	17934776	4e-12	76.8
TP41062	2U	19.36	chr2A	100	63	0	0	2	64	12955238	12955300	2e-24	117
TP8081	2U	19.36	chr2B	97.92	48	1	0	1	48	17530043	17529996	2e-14	84.2
TP40433	2U	20.63	chr2A	98.33	60	1	0	1	60	16067893	16067952	5e-21	106
TP2328	2U	20.94	chr2A	100	64	0	0	1	64	13116341	13116404	6e-25	119
TP42948	2U	23.97	chr2A	97.73	44	1	0	6	49	14807409	14807366	4e-12	76.8
TP27187	2U	26.99	chr2B	96.88	64	2	0	1	64	24500672	24500609	1e-21	108
TP6096	2U	26.99	chr2B	98.44	64	1	0	1	64	24640983	24640920	3e-23	113
TP882	2U	26.99	chr2B	96.88	64	2	0	1	64	23743070	23743133	1e-21	108
TP1226	2U	27.15	chr2A	100	64	0	0	1	64	14215178	14215115	6e-25	119
TP32529	2U	27.15	chr2D	100	64	0	0	1	64	12884524	12884461	6e-25	119
TP15964	2U	27.78	chr2B	100	64	0	0	1	64	24591663	24591726	6e-25	119
TP29274	2U	27.95	chr2A	98.44	64	1	0	1	64	14236039	14236102	3e-23	113
TP29376	2U	27.95	chr2D	100	64	0	0	1	64	13723533	13723596	6e-25	119
TP4372	2U	27.95	chr2B	98.44	64	1	0	1	64	24552730	24552667	3e-23	113
TP30158	2U	28.93	chr2B	96.92	65	1	1	1	64	577151604	577151540	1e-21	108
TP24120	2U	30.37	chr2A	100	64	0	0	1	64	16839363	16839426	6e-25	119
TP35076	2U	30.37	chr2B	100	64	0	0	1	64	26148003	26147940	6e-25	119
TP36109	2U	30.37	chr2B	98.44	64	1	0	1	64	26148000	26148063	3e-23	113
TP4646	2U	30.37	chr2D	100	64	0	0	1	64	16154181	16154244	6e-25	119
TP5960	2U	30.37	chr2A	98.15	54	1	0	1	54	16663573	16663520	1e-17	95.3
TP22436	2U	32.12	chr2A	100	64	0	0	1	64	18068686	18068749	6e-25	119
TP11037	2U	32.24	chr2D	96.55	58	2	0	1	58	18742369	18742426	3e-18	97.1
TP37894	2U	32.24	chr2A	94.92	59	3	0	1	59	19129275	19129333	4e-17	93.5
TP39357	2U	32.24	chr2A	98.31	59	1	0	1	59	19134817	19134875	2e-20	104
TP29382	2U	32.45	chr2D	98.31	59	1	0	6	64	15473630	15473572	2e-20	104
TP25441	2U	32.6	chr2D	95	40	2	0	1	40	15496849	15496810	3e-08	63.9
TP30189	2U	32.6	chr2D	100	37	0	0	1	37	18648757	18648793	7e-10	69.4
TP30456	2U	32.6	chr2D	100	48	0	0	1	48	19022191	19022144	5e-16	89.8
TP45136	2U	34.12	chr2A	98.44	64	1	0	1	64	21005732	21005795	3e-23	113
TP41769	2U	34.47	chr2D	98.44	64	1	0	1	64	20322335	20322398	3e-23	113
TP12707	2U	34.48	chr2A	98.44	64	1	0	1	64	24019555	24019618	3e-23	113
TP15103	2U	34.48	chr2A	98.44	64	1	0	1	64	23970439	23970502	3e-23	113
TP5362	2U	34.48	chr2D	98.31	59	1	0	1	59	22868748	22868806	2e-20	104
TP15817	2U	34.84	chr2B	95.31	64	3	0	1	64	35699177	35699114	6e-20	102
TP21020	2U	35.19	chr2A	100	45	0	0	1	45	24111084	24111040	2e-14	84.2
TP22410	2U	37.79	chr2A	95.16	62	2	1	1	62	24545290	24545350	3e-18	97.1
TP35497	2U	37.79	chr2D	96.67	60	2	0	1	60	24901393	24901334	2e-19	100
TP45776	2U	37.79	chr2A	96.83	63	2	0	1	63	25802842	25802780	5e-21	106
TP45991	2U	37.79	chr2B	96.88	64	1	1	1	64	40354385	40354323	5e-21	106
TP23910	2U	39.66	chr2A	96.88	64	2	0	1	64	27720326	27720263	1e-21	108
TP22729	2U	40.74	chr2D	95.31	64	3	0	1	64	26331007	26330944	6e-20	102
TP29759	2U	40.74	chr2D	96.88	64	2	0	1	64	26500266	26500329	1e-21	108
TP14504	2U	41.94	chr2B	96.72	61	2	0	1	61	40530085	40530145	6e-20	102
TP45777	2U	41.94	chr2A	100	64	0	0	1	64	25802842	25802779	6e-25	119
TP17606	2U	42.97	chr2D	100	60	0	0	1	60	27536514	27536573	1e-22	111
TP5164	2U	42.97	chr2B	98.15	54	1	0	1	54	43629892	43629839	1e-17	95.3
TP8589	2U	42.97	chr2B	96.88	64	2	0	1	64	43237442	43237505	1e-21	108
TP23043	2U	44.05	chr2B	100	44	0	0	1	44	46892975	46893018	8e-14	82.4
TP44922	2U	44.05	chr2D	95.31	64	3	0	1	64	28001520	28001583	6e-20	102
TP13018	2U	44.41	chr2B	98.41	63	1	0	2	64	47231501	47231439	1e-22	111
TP36679	2U	44.59	chr2A	100	55	0	0	1	55	31993935	31993881	6e-20	102
TP40429	2U	44.77	chr2A	100	64	0	0	1	64	32154138	32154075	6e-25	119
TP37659	2U	47.36	chr2A	100	63	0	0	1	63	161334994	161335056	2e-24	117
TP25498	2U	47.73	chr2A	96.88	64	2	0	1	64	31701549	31701486	1e-21	108
TP2786	2U	47.73	chr2D	98.44	64	1	0	1	64	29222782	29222845	3e-23	113
TP38087	2U	48.4	chr2D	96.88	64	2	0	1	64	29754337	29754400	1e-21	108
TP12871	2U	48.73	chr2B	96.88	64	2	0	1	64	50641681	50641744	1e-21	108
TP25377	2U	49.74	chr2D	100	64	0	0	1	64	32431949	32431886	6e-25	119
TP27922	2U	49.74	chr2B	97.14	35	1	0	2	36	50286878	50286912	4e-07	60.2
TP31354	2U	49.74	chr2A	100	64	0	0	1	64	34118980	34118917	6e-25	119
TP10202	2U	50.38	chr2D	98.44	64	1	0	1	64	32793708	32793645	3e-23	113
TP21827	2U	50.74	chr2B	95.38	65	2	1	1	64	55180757	55180821	6e-20	102
TP39069	2U	50.74	chr2D	96.88	64	2	0	1	64	35227903	35227966	1e-21	108
TP44890	2U	50.74	chr2B	100	64	0	0	1	64	54786611	54786674	6e-25	119
TP8311	2U	50.74	chr2D	95.31	64	3	0	1	64	29669075	29669012	6e-20	102
TP28171	2U	51.1	chr2D	100	54	0	0	1	54	33564185	33564132	2e-19	100
TP15907	2U	51.82	chr2D	98.44	64	1	0	1	64	37466265	37466202	3e-23	113
TP20787	2U	51.82	chr2A	91.53	59	5	0	1	59	38530265	38530207	8e-14	82.4
TP24004	2U	51.82	chr2A	95.31	64	3	0	1	64	40246639	40246702	6e-20	102
TP30950	2U	51.82	chr2A	100	45	0	0	1	45	43155477	43155521	2e-14	84.2
TP42536	2U	51.82	chr2B	100	44	0	0	21	64	64099950	64099907	8e-14	82.4
TP4290	2U	51.82	chr2A	96.88	64	2	0	1	64	39232886	39232949	1e-21	108
TP7468	2U	51.82	chr2D	100	38	0	0	1	38	38201231	38201194	2e-10	71.3
TP1868	2U	54.41	chr2D	98.41	63	1	0	1	63	43430108	43430170	1e-22	111
TP19947	2U	54.41	chr2D	98.25	57	1	0	1	57	38637896	38637952	2e-19	100
TP30264	2U	54.41	chr2D	95.92	49	2	0	4	52	43333386	43333338	3e-13	80.5
TP29886	2U	54.75	chr2D	98.44	64	1	0	1	64	38238285	38238348	3e-23	113
TP7878	2U	55.42	chr2D	100	46	0	0	1	46	45556097	45556052	6e-15	86.1
TP10199	2U	56.16	chr2A	100	64	0	0	1	64	49932709	49932646	6e-25	119
TP18076	2U	56.16	chr2A	100	64	0	0	1	64	49932706	49932769	6e-25	119
TP1953	2U	56.16	chr2A	100	64	0	0	1	64	50165034	50164971	6e-25	119
TP19556	2U	56.16	chr2D	97.78	45	1	0	20	64	51420491	51420447	1e-12	78.7
TP20385	2U	56.16	chr2A	97.78	45	1	0	1	45	52009234	52009190	1e-12	78.7
TP24217	2U	56.16	chr2B	98.21	56	1	0	1	56	74835804	74835749	8e-19	99
TP13976	2U	56.52	chr2A	100	30	0	0	1	30	780579315	780579286	5e-06	56.5
TP13089	2U	57.6	chr2B	98.21	56	1	0	1	56	89326616	89326561	8e-19	99
TP20595	2U	57.6	chr2A	98.44	64	1	0	1	64	51228263	51228200	3e-23	113
TP2172	2U	57.6	chr2A	100	42	0	0	1	42	52407337	52407378	1e-12	78.7
TP25431	2U	57.6	chr2B	91.94	62	5	0	1	62	91084826	91084765	2e-15	87.9
TP28923	2U	57.6	chr2A	96.23	53	2	0	1	53	54476000	54476052	2e-15	87.9
TP29346	2U	57.6	chr2A	100	57	0	0	1	57	55851904	55851848	5e-21	106
TP30050	2U	57.6	chr2D	96.88	64	2	0	1	64	56253981	56254044	1e-21	108
TP31948	2U	57.6	chr2A	95.31	64	3	0	1	64	49938003	49937940	6e-20	102
TP35920	2U	57.6	chr2B	98.15	54	1	0	11	64	80121201	80121148	1e-17	95.3
TP37614	2U	57.6	chr2A	98.36	61	1	0	1	61	36719017	36718957	1e-21	108
TP38954	2U	57.6	chr2B	98.39	62	0	1	1	62	78020776	78020836	1e-21	108
TP43245	2U	57.6	chr2D	98.44	64	1	0	1	64	59836533	59836470	3e-23	113
TP45831	2U	57.6	chr2D	97.83	46	0	1	3	48	49895104	49895060	1e-12	78.7
TP6731	2U	57.6	chr2A	100	64	0	0	1	64	836662	836599	6e-25	119
TP25819	2U	58.75	chr2D	100	42	0	0	1	42	55059035	55059076	1e-12	78.7
TP45703	2U	58.75	chr2D	98.44	64	1	0	1	64	55146339	55146402	3e-23	113
TP31295	2U	59.11	chr2B	98.44	64	1	0	1	64	90355301	90355238	3e-23	113
TP13047	2U	59.47	chr2D	100	64	0	0	1	64	55058924	55058861	6e-25	119
TP22159	2U	59.47	chr2D	100	54	0	0	1	54	56298082	56298029	2e-19	100
TP29389	2U	59.83	chr2D	96.72	61	2	0	4	64	55920122	55920062	6e-20	102
TP44255	2U	59.83	chr2B	100	64	0	0	1	64	87410779	87410716	6e-25	119
TP44256	2U	59.83	chr2A	98.44	64	1	0	1	64	56101301	56101238	3e-23	113
TP32257	2U	60.19	chr2A	97.67	43	1	0	22	64	58905994	58905952	1e-11	75
TP32063	2U	60.2	chr2D	100	64	0	0	1	64	62034449	62034386	6e-25	119
TP22089	2U	61.63	chr2D	100	61	0	0	1	61	62034446	62034506	3e-23	113
TP23484	2U	61.97	chr2D	100	52	0	0	1	52	60171568	60171619	3e-18	97.1
TP34262	2U	61.97	chr2D	98.44	64	1	0	1	64	71457762	71457699	3e-23	113
TP11467	2U	61.99	chr2D	96.88	64	2	0	1	64	61024903	61024840	1e-21	108
TP21402	2U	61.99	chr2D	98.44	64	0	1	1	64	64157341	64157279	1e-22	111
TP31695	2U	61.99	chr2A	98.33	60	1	0	1	60	61295507	61295566	5e-21	106
TP43788	2U	61.99	chr2D	89.06	64	1	3	1	58	60204103	60204040	1e-11	75
TP999	2U	61.99	chr2A	100	64	0	0	1	64	868463	868526	6e-25	119
TP24850	2U	62.71	chr2B	100	64	0	0	1	64	104994034	104994097	6e-25	119
TP25407	2U	62.71	chr2B	95.08	61	3	0	1	61	552434502	552434562	3e-18	97.1
TP28305	2U	62.71	chr2A	100	52	0	0	1	52	65399974	65400025	3e-18	97.1
TP31481	2U	62.71	chr2A	98.44	64	1	0	1	64	69323433	69323370	3e-23	113
TP3987	2U	62.71	chr2B	98.11	53	0	1	1	53	99755729	99755780	1e-16	91.6
TP12713	2U	63.38	chr2D	100	58	0	0	7	64	69947171	69947114	1e-21	108
TP15403	2U	63.38	chr2D	96.67	60	2	0	1	60	69527860	69527801	2e-19	100
TP20956	2U	63.38	chr2A	88.71	62	7	0	3	64	69313049	69313110	4e-12	76.8
TP40346	2U	63.38	chr2D	98.44	64	1	0	1	64	66856180	66856117	3e-23	113
TP45490	2U	63.38	chr2D	100	64	0	0	1	64	66150040	66150103	6e-25	119
TP29061	2U	64.51	chr2B	100	64	0	0	1	64	110207890	110207827	6e-25	119
TP44342	2U	64.85	chr2A	90	70	1	1	1	64	74561612	74561543	6e-15	86.1
TP38009	2U	65.4	chr2B	95.31	64	3	0	1	64	118310862	118310799	6e-20	102
TP7875	2U	65.4	chr2D	98.44	64	1	0	1	64	619292305	619292368	3e-23	113
TP31748	2U	65.48	chr2D	96.88	64	2	0	1	64	597826260	597826323	1e-21	108
TP46132	2U	65.48	chr2D	96.88	64	2	0	1	64	598892174	598892237	1e-21	108
TP3060	2U	65.8	chr2D	98.44	64	1	0	1	64	83545505	83545568	3e-23	113
TP3250	2U	65.8	chr2A	98.44	64	1	0	1	64	84554009	84553946	3e-23	113
TP35737	2U	65.8	chr2D	92.19	64	5	0	1	64	619292308	619292245	1e-16	91.6
TP3965	2U	65.8	chr2B	96.88	64	2	0	1	64	135005672	135005609	1e-21	108
TP40327	2U	65.8	chr2D	88.73	71	1	1	1	64	82139843	82139773	3e-13	80.5
TP42671	2U	65.8	chr2B	95.08	61	3	0	4	64	707969253	707969193	3e-18	97.1
TP5211	2U	65.8	chr2D	100	64	0	0	1	64	79927339	79927402	6e-25	119
TP573	2U	65.8	chr2D	96.88	64	2	0	1	64	82142539	82142602	1e-21	108
TP32799	2U	66.12	chr2D	96.88	64	2	0	1	64	78502084	78502147	1e-21	108
TP7028	2U	66.12	chr2D	97.37	38	1	0	3	40	79332780	79332743	8e-09	65.8
TP34192	2U	66.48	chr2D	96.83	63	2	0	2	64	606124477	606124415	5e-21	106
TP36453	2U	66.62	chr2D	100	64	0	0	1	64	603508254	603508317	6e-25	119
TP18974	2U	66.94	chr2D	98	50	1	0	15	64	619534843	619534892	2e-15	87.9
TP30852	2U	66.94	chr2B	97.87	47	1	0	17	63	748068299	748068345	8e-14	82.4
TP31339	2U	66.94	chr2D	98.44	64	1	0	1	64	616967742	616967805	3e-23	113
TP34451	2U	66.94	chr2A	96.88	64	1	1	1	64	744995189	744995127	5e-21	106
TP35507	2U	66.94	chr2A	96.72	61	2	0	4	64	745038215	745038155	6e-20	102
TP45600	2U	66.94	chr2A	96.72	61	1	1	1	61	749054069	749054128	2e-19	100
TP8862	2U	66.94	chr2A	98.44	64	1	0	1	64	747153519	747153582	3e-23	113
TP26071	2U	66.98	chr2D	95.31	64	3	0	1	64	601971042	601970979	6e-20	102
TP31045	2U	66.98	chr2A	98.33	60	1	0	5	64	79498015	79498074	5e-21	106
TP36191	2U	66.98	chr2A	98.44	64	1	0	1	64	736008075	736008138	3e-23	113
TP10521	2U	67.01	chr2B	91.38	58	5	0	1	58	734052851	734052794	3e-13	80.5
TP36452	2U	67.01	chr2A	95.31	64	3	0	1	64	735137431	735137368	6e-20	102
TP40311	2U	67.01	chr2D	96.88	64	2	0	1	64	603539722	603539659	1e-21	108
TP21434	2U	67.2	chr2A	100	58	0	0	1	58	77745204	77745147	1e-21	108
TP9895	2U	67.2	chr2A	97.3	37	0	1	29	64	78565822	78565786	1e-07	62.1
TP45491	2U	67.22	chr2D	100	64	0	0	1	64	595508003	595508066	6e-25	119
TP12746	2U	67.34	chr2D	91.38	58	4	1	1	58	612201808	612201864	1e-12	78.7
TP12750	2U	67.34	chr2D	96.77	62	2	0	3	64	618331436	618331375	2e-20	104
TP16348	2U	67.34	chr2B	100	64	0	0	1	64	732568625	732568562	6e-25	119
TP19066	2U	67.34	chr2A	98.25	57	1	0	1	57	745035601	745035657	2e-19	100
TP2085	2U	67.34	chr2A	96.88	64	2	0	1	64	749447277	749447340	1e-21	108
TP2094	2U	67.34	chr2A	96.08	51	2	0	1	51	745671883	745671933	2e-14	84.2
TP25701	2U	67.34	chr2B	96.88	64	2	0	1	64	752406884	752406821	1e-21	108
TP27695	2U	67.34	chr2D	93.75	64	4	0	1	64	607647869	607647932	3e-18	97.1
TP304	2U	67.34	chr2A	96.88	64	2	0	1	64	744614260	744614323	1e-21	108
TP33492	2U	67.34	chr2B	100	64	0	0	1	64	732568622	732568685	6e-25	119
TP35470	2U	67.34	chr2B	97.87	47	1	0	1	47	737226762	737226808	8e-14	82.4
TP36009	2U	67.34	chr2B	98.44	64	1	0	1	64	732893513	732893576	3e-23	113
TP39214	2U	67.34	chr2B	93.65	63	4	0	1	63	731248585	731248647	1e-17	95.3
TP42904	2U	67.34	chr2D	100	64	0	0	1	64	599917238	599917175	6e-25	119
TP43125	2U	67.34	chr2A	96.88	64	2	0	1	64	751207613	751207550	1e-21	108
TP43349	2U	67.34	chr2B	95.24	63	3	0	2	64	754551392	754551330	2e-19	100
TP44513	2U	67.34	chr2D	96.88	64	2	0	1	64	606655652	606655715	1e-21	108
TP943	2U	67.34	chr2D	92.06	63	5	0	1	63	612979289	612979351	5e-16	89.8
TP14333	2U	67.56	chr2D	100	64	0	0	1	64	607986444	607986507	6e-25	119
TP14664	2U	67.56	chr2B	89.71	68	2	1	1	63	741475587	741475654	8e-14	82.4
TP19662	2U	67.56	chr2B	95.83	48	2	0	1	48	123108071	123108118	1e-12	78.7
TP20226	2U	67.56	chr2A	98.44	64	1	0	1	64	746853173	746853236	3e-23	113
TP22229	2U	67.56	chr2A	100	39	0	0	1	39	738969842	738969804	5e-11	73.1
TP2296	2U	67.56	chr2D	96.88	64	2	0	1	64	619190489	619190426	1e-21	108
TP23781	2U	67.56	chr2D	100	37	0	0	1	37	595445089	595445125	7e-10	69.4
TP25495	2U	67.56	chr2B	100	64	0	0	1	64	747077032	747077095	6e-25	119
TP27789	2U	67.56	chr2D	96.88	64	2	0	1	64	606655655	606655592	1e-21	108
TP3739	2U	67.56	chr2B	91.3	69	1	1	1	64	735959530	735959598	5e-16	89.8
TP38115	2U	67.56	chr2A	96.88	64	2	0	1	64	740841089	740841026	1e-21	108
TP38376	2U	67.56	chr2D	95.52	67	0	1	1	64	79259043	79259109	2e-20	104
TP41737	2U	67.56	chr2A	100	64	0	0	1	64	738973954	738974017	6e-25	119
TP43717	2U	67.56	chr2B	91.8	61	5	0	1	61	724734855	724734915	6e-15	86.1
TP18121	2U	67.68	chr2A	91.04	67	1	2	1	62	599303165	599303099	6e-15	86.1
TP22424	2U	67.68	chr2D	96.88	64	2	0	1	64	595428110	595428047	1e-21	108
TP32798	2U	67.68	chr2D	98.44	64	1	0	1	64	78502084	78502147	3e-23	113
TP4849	2U	67.68	chr2D	100	64	0	0	1	64	603543222	603543159	6e-25	119
TP21890	2U	68.02	chr2D	94.64	56	3	0	1	56	599897179	599897234	2e-15	87.9
TP43412	2U	68.02	chr2D	94.12	51	3	0	1	51	600568848	600568798	1e-12	78.7
TP5337	2U	68.02	chr2D	96.49	57	2	0	1	57	599893624	599893568	1e-17	95.3
TP256	2U	68.03	chr2A	96.67	60	1	1	6	64	765994901	765994842	8e-19	99
TP30947	2U	68.03	chr2D	98.39	62	1	0	3	64	617539062	617539001	4e-22	110
TP31496	2U	68.03	chr2B	95.31	64	2	1	1	64	12070140	12070202	2e-19	100
TP34364	2U	68.03	chr2D	98.44	64	1	0	1	64	599931070	599931007	3e-23	113
TP3608	2U	68.03	chr2A	96.88	64	2	0	1	64	751207610	751207673	1e-21	108
TP45366	2U	68.03	chr2A	100	64	0	0	1	64	748439689	748439752	6e-25	119
TP5830	2U	68.03	chr2A	98.41	63	1	0	1	63	751419658	751419596	1e-22	111
TP12043	2U	68.3	chr2B	100	64	0	0	1	64	720481443	720481506	6e-25	119
TP18565	2U	68.3	chr2B	95.65	46	2	0	1	46	717929729	717929684	1e-11	75
TP34661	2U	68.3	chr2D	96.88	64	2	0	1	64	595213717	595213654	1e-21	108
TP25987	2U	70.11	chr2B	100	64	0	0	1	64	719529071	719529008	6e-25	119
TP43698	2U	70.11	chr2D	95.74	47	2	0	1	47	592086807	592086761	4e-12	76.8
TP31007	2U	71.52	chr2B	95.31	64	3	0	1	64	716180559	716180622	6e-20	102
TP32294	2U	71.86	chr2B	96.43	56	2	0	1	56	716052426	716052371	4e-17	93.5
TP463	2U	73.27	chr2D	93.1	58	4	0	7	64	590944604	590944547	6e-15	86.1
TP10614	2U	73.5	chr2D	98.44	64	1	0	1	64	586950198	586950261	3e-23	113
TP11542	2U	73.5	chr2A	98.39	62	1	0	1	62	723578536	723578597	4e-22	110
TP13016	2U	73.5	chr2A	96.88	64	2	0	1	64	723100570	723100633	1e-21	108
TP14375	2U	74.68	chr2B	98.44	64	1	0	1	64	711319990	711320053	3e-23	113
TP30228	2U	75.68	chr2A	100	47	0	0	1	47	723067501	723067547	2e-15	87.9
TP4163	2U	76.04	chr2B	96.83	63	2	0	2	64	709796306	709796244	5e-21	106
TP21472	2U	76.47	chr2B	100	48	0	0	1	48	709999612	709999565	5e-16	89.8
TP39766	2U	76.47	chr2A	97.5	40	1	0	4	43	721644669	721644708	7e-10	69.4
TP8388	2U	76.47	chr2A	98.44	64	1	0	1	64	721724926	721724989	3e-23	113
TP26460	2U	78.1	chr2D	98.44	64	1	0	1	64	586946732	586946669	3e-23	113
TP18602	2U	78.43	chr2B	100	64	0	0	1	64	708826654	708826591	6e-25	119
TP17116	2U	78.89	chr2D	93.62	47	2	1	1	47	585855000	585855045	7e-10	69.4
TP20997	2U	78.89	chr2A	100	64	0	0	1	64	719527805	719527868	6e-25	119
TP10318	2U	82.25	chr2D	100	64	0	0	1	64	579065131	579065194	6e-25	119
TP37555	2U	82.27	chr2B	94.92	59	3	0	2	60	704410091	704410033	4e-17	93.5
TP11101	2U	82.63	chr2A	98.44	64	1	0	1	64	718730528	718730465	3e-23	113
TP19169	2U	82.63	chr2B	98.44	64	1	0	1	64	705348844	705348781	3e-23	113
TP18171	2U	82.99	chr2B	98.44	64	1	0	1	64	695843128	695843191	3e-23	113
TP30418	2U	82.99	chr2D	96.49	57	2	0	8	64	584251691	584251635	1e-17	95.3
TP30924	2U	82.99	chr2B	98.44	64	1	0	1	64	698002499	698002436	3e-23	113
TP8687	2U	82.99	chr2B	96.88	64	2	0	1	64	704292277	704292214	1e-21	108
TP2381	2U	83.35	chr2A	95.31	64	3	0	1	64	718117196	718117259	6e-20	102
TP44067	2U	83.35	chr2D	96.88	64	2	0	1	64	580622557	580622620	1e-21	108
TP17463	2U	83.71	chr2A	96.15	52	2	0	1	52	717191496	717191445	6e-15	86.1
TP31787	2U	85.66	chr2A	98.15	54	1	0	1	54	715383583	715383636	1e-17	95.3
TP33780	2U	85.88	chr2B	98.44	64	1	0	1	64	693314986	693314923	3e-23	113
TP42612	2U	85.88	chr2D	98.44	64	1	0	1	64	566730821	566730758	3e-23	113
TP46044	2U	85.88	chr2D	95.08	61	3	0	4	64	577238293	577238233	3e-18	97.1
TP36190	2U	86.81	chr2D	100	48	0	0	1	48	576290866	576290819	5e-16	89.8
TP19699	2U	87.17	chr2D	100	47	0	0	1	47	574657340	574657294	2e-15	87.9
TP4558	2U	87.53	chr2A	100	64	0	0	1	64	711509452	711509389	6e-25	119
TP6082	2U	87.53	chr2B	100	64	0	0	1	64	690996795	690996858	6e-25	119
TP27197	2U	87.56	chr2D	95.31	64	3	0	1	64	575366591	575366528	6e-20	102
TP34301	2U	87.89	chr2A	95.16	62	3	0	1	62	711977769	711977708	8e-19	99
TP10623	2U	88.56	chr2B	96.88	64	2	0	1	64	686046545	686046608	1e-21	108
TP32284	2U	88.56	chr2A	100	64	0	0	1	64	712982110	712982047	6e-25	119
TP28218	2U	89.11	chr2A	96.77	62	2	0	1	62	709158506	709158445	2e-20	104
TP36971	2U	89.11	chr2B	96.88	64	2	0	1	64	689777106	689777169	1e-21	108
TP40115	2U	89.11	chr2D	92.31	52	0	1	17	64	569373783	569373732	2e-10	71.3
TP24305	2U	89.47	chr2B	93.75	64	4	0	1	64	681730340	681730277	3e-18	97.1
TP25467	2U	89.47	chr2A	95.24	63	3	0	1	63	709733163	709733225	2e-19	100
TP5701	2U	89.47	chr2A	96.88	64	1	1	1	64	709698709	709698647	5e-21	106
TP12709	2U	90.55	chr2D	100	64	0	0	1	64	564682256	564682319	6e-25	119
TP2396	2U	93.14	chr2A	100	64	0	0	1	64	703881238	703881301	6e-25	119
TP19106	2U	93.5	chr2A	96.88	64	2	0	1	64	703291390	703291453	1e-21	108
TP3599	2U	93.5	chr2D	100	46	0	0	1	46	562888246	562888291	6e-15	86.1
TP37357	2U	93.5	chr2A	100	64	0	0	1	64	703386600	703386537	6e-25	119
TP17745	2U	93.86	chr2A	98.15	54	1	0	1	54	703111233	703111180	1e-17	95.3
TP10751	2U	94.28	chr2D	100	64	0	0	1	64	547951845	547951782	6e-25	119
TP18089	2U	94.28	chr2D	100	64	0	0	1	64	556365030	556365093	6e-25	119
TP23785	2U	94.28	chr2D	100	64	0	0	1	64	545850576	545850513	6e-25	119
TP24843	2U	94.28	chr2D	88.24	51	5	1	11	61	528096652	528096701	4e-07	60.2
TP25884	2U	94.28	chr2D	100	64	0	0	1	64	540190771	540190834	6e-25	119
TP28303	2U	94.28	chr2D	100	64	0	0	1	64	552021080	552021017	6e-25	119
TP36080	2U	94.28	chr2A	100	56	0	0	1	56	690747786	690747731	2e-20	104
TP36187	2U	94.28	chr2D	98.44	64	1	0	1	64	556366292	556366229	3e-23	113
TP42026	2U	94.28	chr2B	96.83	63	1	1	1	63	658484814	658484753	2e-20	104
TP44570	2U	94.28	chr2D	96.88	64	2	0	1	64	537438337	537438274	1e-21	108
TP4882	2U	94.28	chr2A	100	64	0	0	1	64	698823695	698823758	6e-25	119
TP4996	2U	94.28	chr2A	98.46	65	0	1	1	64	698294143	698294207	3e-23	113
TP10924	2U	96.81	chr2A	100	64	0	0	1	64	694908827	694908764	6e-25	119
TP1113	2U	96.81	chr2A	96.88	64	2	0	1	64	694912201	694912138	1e-21	108
TP11208	2U	96.81	chr2A	98.44	64	1	0	1	64	698299324	698299387	3e-23	113
TP16045	2U	96.81	chr2B	100	56	0	0	1	56	659536451	659536396	2e-20	104
TP28258	2U	96.81	chr2D	100	64	0	0	1	64	553333707	553333770	6e-25	119
TP28339	2U	96.81	chr2A	100	64	0	0	1	64	694908824	694908887	6e-25	119
TP36069	2U	96.81	chr2A	100	64	0	0	1	64	697375797	697375734	6e-25	119
TP36252	2U	96.81	chr2D	98.44	64	1	0	1	64	548748174	548748237	3e-23	113
TP40200	2U	96.81	chr2D	100	38	0	0	1	38	557863375	557863338	2e-10	71.3
TP41725	2U	97.17	chr2D	90.62	64	0	1	1	64	552907339	552907396	3e-13	80.5
TP11696	2U	98.46	chr2D	98.44	64	1	0	1	64	441887242	441887179	3e-23	113
TP14999	2U	98.46	chr2A	100	60	0	0	1	60	589657411	589657470	1e-22	111
TP1825	2U	98.46	chr2A	92.19	64	5	0	1	64	702940412	702940349	1e-16	91.6
TP36512	2U	98.46	chr2B	100	64	0	0	1	64	582808673	582808736	6e-25	119
TP423	2U	98.46	chr2D	95.31	64	3	0	1	64	540057300	540057363	6e-20	102
TP26620	2U	98.58	chr2D	100	63	0	0	2	64	546813433	546813495	2e-24	117
TP39549	2U	98.58	chr2A	100	64	0	0	1	64	703207780	703207717	6e-25	119
TP40070	2U	98.58	chr2D	92.73	55	3	1	7	61	562804290	562804343	1e-12	78.7
TP7269	2U	98.58	chr2D	96.83	63	2	0	2	64	561936764	561936826	5e-21	106
TP10224	2U	101.78	chr2B	96.83	63	2	0	1	63	461128517	461128455	5e-21	106
TP10233	2U	101.78	chr2B	98.44	64	1	0	1	64	599218300	599218363	3e-23	113
TP10776	2U	101.78	chr2B	98.44	64	1	0	1	64	495325287	495325350	3e-23	113
TP10946	2U	101.78	chr2A	98.44	64	1	0	1	64	532153678	532153741	3e-23	113
TP12056	2U	101.78	chr2A	98.44	64	1	0	1	64	674533230	674533167	3e-23	113
TP12444	2U	101.78	chr2A	100	63	0	0	2	64	131711938	131711876	2e-24	117
TP12507	2U	101.78	chr2D	96.88	64	2	0	1	64	128395670	128395733	1e-21	108
TP12756	2U	101.78	chr2D	96.72	61	2	0	1	61	509244908	509244968	6e-20	102
TP12935	2U	101.78	chr2D	97.96	49	1	0	15	63	400384913	400384865	6e-15	86.1
TP1348	2U	101.78	chr2B	100	64	0	0	1	64	206753312	206753249	6e-25	119
TP13514	2U	101.78	chr2B	100	64	0	0	1	64	570879038	570878975	6e-25	119
TP13642	2U	101.78	chr2A	96.08	51	2	0	1	51	572957172	572957222	2e-14	84.2
TP14588	2U	101.78	chr2D	98.44	64	1	0	1	64	413347952	413348015	3e-23	113
TP15459	2U	101.78	chr2D	96.97	66	0	1	1	64	540825094	540825029	4e-22	110
TP17948	2U	101.78	chr2B	100	64	0	0	1	64	493980794	493980731	6e-25	119
TP19588	2U	101.78	chr2B	100	64	0	0	1	64	465826433	465826370	6e-25	119
TP21038	2U	101.78	chr2D	91.94	62	4	1	4	64	516323897	516323836	6e-15	86.1
TP22746	2U	101.78	chr2D	100	64	0	0	1	64	252140962	252141025	6e-25	119
TP25680	2U	101.78	chr2B	100	62	0	0	1	62	465826616	465826677	8e-24	115
TP2670	2U	101.78	chr2B	96.88	64	2	0	1	64	359063675	359063738	1e-21	108
TP29415	2U	101.78	chr2B	100	64	0	0	1	64	402557110	402557173	6e-25	119
TP30501	2U	101.78	chr2A	100	64	0	0	1	64	608928920	608928983	6e-25	119
TP30785	2U	101.78	chr2B	95.31	64	3	0	1	64	460552121	460552058	6e-20	102
TP31474	2U	101.78	chr2A	93.33	60	4	0	1	60	519844392	519844333	5e-16	89.8
TP32428	2U	101.78	chr2B	100	64	0	0	1	64	571336173	571336236	6e-25	119
TP33247	2U	101.78	chr2A	96.88	64	2	0	1	64	111410273	111410336	1e-21	108
TP33253	2U	101.78	chr2B	98.44	64	1	0	1	64	531563272	531563209	3e-23	113
TP34269	2U	101.78	chr2B	100	64	0	0	1	64	312192752	312192689	6e-25	119
TP36200	2U	101.78	chr2D	96.88	64	2	0	1	64	391392880	391392943	1e-21	108
TP37096	2U	101.78	chr2D	98.44	64	1	0	1	64	536149432	536149369	3e-23	113
TP37280	2U	101.78	chr2D	95.24	63	2	1	3	64	169546815	169546877	8e-19	99
TP378	2U	101.78	chr2A	100	64	0	0	1	64	686172520	686172457	6e-25	119
TP38010	2U	101.78	chr2D	98.44	64	1	0	1	64	112694143	112694080	3e-23	113
TP38420	2U	101.78	chr2B	98.44	64	1	0	1	64	176169017	176169080	3e-23	113
TP38665	2U	101.78	chr2D	98.44	64	1	0	1	64	516864204	516864267	3e-23	113
TP39644	2U	101.78	chr2D	98.44	64	1	0	1	64	422799583	422799520	3e-23	113
TP40014	2U	101.78	chr2D	96.88	64	2	0	1	64	510676452	510676389	1e-21	108
TP40080	2U	101.78	chr2B	100	57	0	0	2	58	622922933	622922877	5e-21	106
TP40439	2U	101.78	chr2D	88.33	60	7	0	1	60	5168260	5168201	5e-11	73.1
TP42131	2U	101.78	chr2D	96.88	64	2	0	1	64	475877262	475877325	1e-21	108
TP42507	2U	101.78	chr2B	96.88	64	2	0	1	64	638773658	638773595	1e-21	108
TP4371	2U	101.78	chr2A	96.77	62	1	1	1	61	625024938	625024999	6e-20	102
TP4395	2U	101.78	chr2A	100	64	0	0	1	64	686171394	686171457	6e-25	119
TP43992	2U	101.78	chr2A	98.33	60	1	0	1	60	685970905	685970964	5e-21	106
TP45537	2U	101.78	chr2D	96.88	64	2	0	1	64	493075640	493075577	1e-21	108
TP4584	2U	101.78	chr2A	98.44	64	1	0	1	64	159197980	159197917	3e-23	113
TP4897	2U	101.78	chr2D	91.94	62	0	1	1	62	146535249	146535305	8e-14	82.4
TP5139	2U	101.78	chr2D	96.72	61	2	0	1	61	480576367	480576307	6e-20	102
TP5280	2U	101.78	chr2D	98.44	64	1	0	1	64	401113257	401113320	3e-23	113
TP5484	2U	101.78	chr2D	96.88	64	2	0	1	64	400066229	400066292	1e-21	108
TP6088	2U	101.78	chr2B	98.44	64	1	0	1	64	513475181	513475118	3e-23	113
TP6828	2U	101.78	chr2A	95.56	45	2	0	1	45	144954104	144954060	5e-11	73.1
TP6887	2U	101.78	chr2A	93.85	65	3	1	1	64	672342838	672342902	3e-18	97.1
TP7804	2U	101.78	chr2A	98.44	64	1	0	1	64	591277633	591277696	3e-23	113
TP8739	2U	101.78	chr2B	100	64	0	0	1	64	458245731	458245794	6e-25	119
TP9617	2U	101.78	chr2A	90	50	0	4	6	52	665709902	665709949	4e-07	60.2
TP9787	2U	101.78	chr2A	96.88	64	2	0	1	64	327206233	327206170	1e-21	108
TP25266	2U	102.44	chr2D	91.53	59	3	2	1	57	151985266	151985324	3e-13	80.5
TP10156	2U	102.78	chr2A	98.44	64	1	0	1	64	583023645	583023582	3e-23	113
TP10165	2U	102.78	chr2A	100	64	0	0	1	64	586449518	586449455	6e-25	119
TP10692	2U	102.78	chr2A	98.33	60	1	0	5	64	14102237	14102296	5e-21	106
TP10904	2U	102.78	chr2A	100	63	0	0	2	64	573520397	573520459	2e-24	117
TP1100	2U	102.78	chr2B	96.72	61	2	0	4	64	485040251	485040191	6e-20	102
TP11570	2U	102.78	chr2B	100	64	0	0	1	64	623399606	623399669	6e-25	119
TP12420	2U	102.78	chr2D	98.44	64	1	0	1	64	438474184	438474121	3e-23	113
TP13036	2U	102.78	chr2A	98.44	64	1	0	1	64	393013792	393013855	3e-23	113
TP13053	2U	102.78	chr2A	100	64	0	0	1	64	569064226	569064163	6e-25	119
TP13496	2U	102.78	chr2D	98.44	64	1	0	1	64	481451132	481451195	3e-23	113
TP13599	2U	102.78	chr2B	98.44	64	1	0	1	64	476455954	476456017	3e-23	113
TP13755	2U	102.78	chr2D	93.75	64	0	1	1	64	403189291	403189350	4e-17	93.5
TP14277	2U	102.78	chr2A	96.92	65	1	1	1	64	171618629	171618565	1e-21	108
TP14327	2U	102.78	chr2B	100	64	0	0	1	64	547434005	547434068	6e-25	119
TP14839	2U	102.78	chr2D	98.44	64	1	0	1	64	451926441	451926504	3e-23	113
TP15229	2U	102.78	chr2D	95.31	64	3	0	1	64	132690750	132690687	6e-20	102
TP16003	2U	102.78	chr2D	98.44	64	1	0	1	64	469114915	469114852	3e-23	113
TP16279	2U	102.78	chr2B	100	46	0	0	19	64	48030532	48030577	6e-15	86.1
TP16374	2U	102.78	chr2D	100	61	0	0	1	61	468789922	468789982	3e-23	113
TP17118	2U	102.78	chr2A	100	64	0	0	1	64	668012180	668012243	6e-25	119
TP17201	2U	102.78	chr2A	100	43	0	0	1	43	607513222	607513264	3e-13	80.5
TP17458	2U	102.78	chr2D	100	64	0	0	1	64	343161196	343161259	6e-25	119
TP17485	2U	102.78	chr2D	97.87	47	1	0	1	47	373981728	373981682	8e-14	82.4
TP18034	2U	102.78	chr2A	100	60	0	0	1	60	580323582	580323641	1e-22	111
TP18203	2U	102.78	chr2A	96.88	64	2	0	1	64	538393011	538392948	1e-21	108
TP18644	2U	102.78	chr2A	86.57	67	5	2	2	64	667224149	667224215	2e-10	71.3
TP19201	2U	102.78	chr2D	98.08	52	1	0	1	52	404845398	404845347	1e-16	91.6
TP19787	2U	102.78	chr2A	98.44	64	1	0	1	64	610710925	610710988	3e-23	113
TP20220	2U	102.78	chr2D	100	64	0	0	1	64	141192075	141192012	6e-25	119
TP20264	2U	102.78	chr2D	98.44	64	1	0	1	64	452587919	452587982	3e-23	113
TP20838	2U	102.78	chr2A	98.44	64	1	0	1	64	551989518	551989581	3e-23	113
TP2112	2U	102.78	chr2D	95.38	65	2	1	1	64	368554288	368554224	6e-20	102
TP2131	2U	102.78	chr2D	96.88	64	2	0	1	64	151482225	151482162	1e-21	108
TP21711	2U	102.78	chr2A	100	36	0	0	1	36	537471425	537471460	2e-09	67.6
TP24513	2U	102.78	chr2D	98.44	64	1	0	1	64	153801756	153801819	3e-23	113
TP24775	2U	102.78	chr2A	100	64	0	0	1	64	671712361	671712424	6e-25	119
TP2486	2U	102.78	chr2A	100	64	0	0	1	64	675747211	675747148	6e-25	119
TP25409	2U	102.78	chr2D	100	47	0	0	1	47	507749751	507749797	2e-15	87.9
TP25705	2U	102.78	chr2D	100	64	0	0	1	64	532761093	532761030	6e-25	119
TP25991	2U	102.78	chr2D	98.44	64	1	0	1	64	398508187	398508124	3e-23	113
TP26699	2U	102.78	chr2A	92.54	67	2	1	1	64	592851056	592851122	4e-17	93.5
TP26793	2U	102.78	chr2D	98.44	64	1	0	1	64	161376089	161376026	3e-23	113
TP2825	2U	102.78	chr2B	100	64	0	0	1	64	492621484	492621547	6e-25	119
TP28890	2U	102.78	chr2D	97.67	43	1	0	1	43	523360576	523360618	1e-11	75
TP29517	2U	102.78	chr2A	100	64	0	0	1	64	527900986	527900923	6e-25	119
TP29652	2U	102.78	chr2A	98.44	64	1	0	1	64	533942002	533942065	3e-23	113
TP30637	2U	102.78	chr2A	95.08	61	3	0	1	61	194178605	194178545	3e-18	97.1
TP30638	2U	102.78	chr2A	100	64	0	0	1	64	675076363	675076300	6e-25	119
TP31897	2U	102.78	chr2B	100	47	0	0	13	59	491355460	491355414	2e-15	87.9
TP32254	2U	102.78	chr2D	98.44	64	1	0	1	64	141192072	141192135	3e-23	113
TP32953	2U	102.78	chr2B	87.3	63	3	5	4	64	548388997	548388938	2e-09	67.6
TP33189	2U	102.78	chr2A	96.88	64	2	0	1	64	560582629	560582692	1e-21	108
TP33463	2U	102.78	chr2A	100	64	0	0	1	64	527467294	527467231	6e-25	119
TP3430	2U	102.78	chr2B	100	64	0	0	1	64	503440121	503440184	6e-25	119
TP34699	2U	102.78	chr2B	98.44	64	1	0	1	64	545155133	545155070	3e-23	113
TP36487	2U	102.78	chr2B	100	63	0	0	1	63	216469316	216469254	2e-24	117
TP36831	2U	102.78	chr2A	100	64	0	0	1	64	573564911	573564848	6e-25	119
TP37010	2U	102.78	chr2D	98.36	61	1	0	1	61	502110247	502110307	1e-21	108
TP37101	2U	102.78	chr2B	100	64	0	0	1	64	455468010	455468073	6e-25	119
TP37258	2U	102.78	chr2A	94.03	67	1	1	1	64	631843982	631843916	8e-19	99
TP37842	2U	102.78	chr2A	96.08	51	2	0	2	52	582757883	582757833	2e-14	84.2
TP3837	2U	102.78	chr2D	97.44	39	1	0	26	64	389282299	389282337	2e-09	67.6
TP38532	2U	102.78	chr2D	98.36	61	1	0	4	64	420814683	420814743	1e-21	108
TP39063	2U	102.78	chr2D	100	46	0	0	2	47	204137915	204137870	6e-15	86.1
TP40763	2U	102.78	chr2B	96.88	64	2	0	1	64	383365273	383365210	1e-21	108
TP41130	2U	102.78	chr2A	98.44	64	1	0	1	64	571273298	571273361	3e-23	113
TP41153	2U	102.78	chr2D	100	64	0	0	1	64	480777092	480777029	6e-25	119
TP41232	2U	102.78	chr2D	100	64	0	0	1	64	404120049	404120112	6e-25	119
TP41433	2U	102.78	chr2D	100	64	0	0	1	64	526526754	526526691	6e-25	119
TP42049	2U	102.78	chr2B	93.75	64	3	1	1	64	608541490	608541428	1e-17	95.3
TP42081	2U	102.78	chr2A	98.44	64	1	0	1	64	579554990	579555053	3e-23	113
TP421	2U	102.78	chr2D	100	64	0	0	1	64	528478072	528478009	6e-25	119
TP42235	2U	102.78	chr2A	100	64	0	0	1	64	133697842	133697905	6e-25	119
TP42358	2U	102.78	chr2B	96.72	61	2	0	4	64	556219347	556219407	6e-20	102
TP42425	2U	102.78	chr2D	100	64	0	0	1	64	126969204	126969267	6e-25	119
TP42678	2U	102.78	chr2B	98.44	64	1	0	1	64	530414685	530414622	3e-23	113
TP42831	2U	102.78	chr2A	98.44	64	1	0	1	64	159936097	159936034	3e-23	113
TP42876	2U	102.78	chr2D	95.31	64	3	0	1	64	472131846	472131783	6e-20	102
TP45862	2U	102.78	chr2D	93.75	64	1	1	1	64	447161961	447161901	4e-17	93.5
TP46046	2U	102.78	chr2D	100	64	0	0	1	64	380694967	380694904	6e-25	119
TP4605	2U	102.78	chr2B	100	60	0	0	1	60	214822314	214822373	1e-22	111
TP4752	2U	102.78	chr2D	96.88	64	2	0	1	64	144565857	144565920	1e-21	108
TP5075	2U	102.78	chr2D	100	62	0	0	3	64	521578900	521578961	8e-24	115
TP5193	2U	102.78	chr2D	95.24	63	3	0	2	64	532609594	532609532	2e-19	100
TP5409	2U	102.78	chr2D	100	64	0	0	1	64	155731400	155731337	6e-25	119
TP5817	2U	102.78	chr2D	98.44	64	1	0	1	64	494655204	494655141	3e-23	113
TP606	2U	102.78	chr2B	98.39	62	0	1	4	64	477564923	477564862	1e-21	108
TP7632	2U	102.78	chr2B	96.88	64	2	0	1	64	629651083	629651146	1e-21	108
TP7638	2U	102.78	chr2B	100	64	0	0	1	64	632566016	632566079	6e-25	119
TP7642	2U	102.78	chr2A	98.44	64	1	0	1	64	676732580	676732643	3e-23	113
TP8326	2U	102.78	chr2D	100	64	0	0	1	64	155731879	155731816	6e-25	119
TP8899	2U	102.78	chr2D	98.44	64	1	0	1	64	135282353	135282290	3e-23	113
TP9779	2U	102.78	chr2A	96.97	33	1	0	32	64	672756473	672756505	5e-06	56.5
TP40766	2U	104	chr2D	98.44	64	1	0	1	64	119078962	119078899	3e-23	113
TP44422	2U	104	chr2D	98.44	64	1	0	1	64	121733868	121733931	3e-23	113
TP21351	2U	104.53	chr2D	98.36	61	1	0	1	61	119368139	119368079	1e-21	108
TP24710	2U	105.53	chr2B	100	42	0	0	1	42	170938426	170938385	1e-12	78.7
TP7709	2U	105.53	chr2A	100	64	0	0	1	64	125947673	125947610	6e-25	119
TP26411	2U	111.06	chr2B	92.65	68	1	2	1	64	166973077	166973144	1e-17	95.3
TP14998	2U	120.45	chr2A	93.55	62	3	1	1	61	117841975	117842036	1e-16	91.6
TP2676	2U	120.45	chr2D	100	41	0	0	24	64	116490416	116490376	4e-12	76.8
TP3319	2U	121.12	chr2A	98.44	64	1	0	1	64	107318055	107318118	3e-23	113
TP35369	2U	122.19	chr2D	98.44	64	1	0	1	64	102650660	102650597	3e-23	113
TP3870	2U	122.53	chr2A	98.31	59	1	0	1	59	99161386	99161444	2e-20	104
TP21486	2U	123.2	chr2A	100	64	0	0	1	64	98137239	98137176	6e-25	119
TP40205	2U	123.2	chr2B	95.08	61	3	0	4	64	148866194	148866134	3e-18	97.1
TP44258	2U	123.53	chr2B	98.44	64	1	0	1	64	147225519	147225456	3e-23	113
TP27511	2U	123.87	chr2D	98.44	64	1	0	1	64	89886913	89886850	3e-23	113
TP32353	2U	123.87	chr2A	100	64	0	0	1	64	90743002	90742939	6e-25	119
TP18725	2U	129.01	chr2D	100	64	0	0	1	64	86526439	86526502	6e-25	119
TP14020	2U	129.75	chr2B	100	58	0	0	1	58	136956500	136956443	1e-21	108
TP27581	3U	0	chr3D	98.44	64	1	0	1	64	62327538	62327601	3e-23	113
TP20286	3U	5.4	chr3A	98.44	64	0	1	1	64	83723657	83723595	1e-22	111
TP13664	3U	5.92	chr3D	96.88	64	2	0	1	64	64769478	64769541	1e-21	108
TP33656	3U	6.55	chr3B	100	64	0	0	1	64	113356326	113356263	6e-25	119
TP4597	3U	6.91	chr3D	100	41	0	0	24	64	69904315	69904355	4e-12	76.8
TP35987	3U	8.74	chr3B	100	64	0	0	1	64	110893725	110893788	6e-25	119
TP3446	3U	12.64	chr3A	100	64	0	0	1	64	82396121	82396058	6e-25	119
TP31959	3U	14.08	chr3D	97.62	42	1	0	1	42	75632028	75631987	5e-11	73.1
TP30435	3U	16.54	chr3B	94.83	58	3	0	7	64	116231476	116231419	1e-16	91.6
TP9885	3U	16.82	chr3D	95.45	66	1	1	1	64	71958126	71958061	2e-20	104
TP28703	3U	18.35	chr3A	100	64	0	0	1	64	86374328	86374265	6e-25	119
TP37309	3U	18.76	chr3B	100	64	0	0	1	64	117340652	117340715	6e-25	119
TP21937	3U	19.83	chr3A	96.88	64	2	0	1	64	88555152	88555215	1e-21	108
TP44118	3U	19.83	chr3D	96.83	63	2	0	1	63	75354889	75354951	5e-21	106
TP19722	3U	20.27	chr3D	98.44	64	1	0	1	64	75352315	75352252	3e-23	113
TP40356	3U	20.9	chr3B	98.28	58	1	0	2	59	124489247	124489304	6e-20	102
TP19504	3U	21.64	chr3A	100	64	0	0	1	64	97477107	97477044	6e-25	119
TP243	3U	21.64	chr3D	98.44	64	1	0	1	64	81119179	81119116	3e-23	113
TP26632	3U	21.64	chr3D	95.45	66	1	1	1	64	75960138	75960203	2e-20	104
TP43367	3U	21.64	chr3A	100	64	0	0	1	64	96684378	96684315	6e-25	119
TP1316	3U	24.17	chr3D	98.41	63	1	0	2	64	76378234	76378296	1e-22	111
TP4205	3U	24.17	chr3D	98.44	64	1	0	1	64	75944564	75944627	3e-23	113
TP11981	3U	24.53	chr3B	98.44	64	1	0	1	64	132854969	132854906	3e-23	113
TP1616	3U	24.53	chr3D	98.44	64	1	0	1	64	79424296	79424359	3e-23	113
TP38860	3U	24.53	chr3B	96.88	64	2	0	1	64	128688096	128688159	1e-21	108
TP41688	3U	24.53	chr3A	98.44	64	1	0	1	64	98956427	98956364	3e-23	113
TP44537	3U	24.53	chr3A	98.46	65	0	1	1	64	93580169	93580233	3e-23	113
TP44670	3U	24.53	chr3B	96.88	64	2	0	1	64	128073802	128073739	1e-21	108
TP45779	3U	24.53	chr3A	100	64	0	0	1	64	56675460	56675397	6e-25	119
TP18029	3U	24.88	chr3A	96.3	54	2	0	11	64	93555743	93555796	5e-16	89.8
TP27066	3U	24.88	chr3B	100	58	0	0	1	58	131290783	131290726	1e-21	108
TP33817	3U	24.88	chr3B	100	64	0	0	1	64	127585874	127585937	6e-25	119
TP40396	3U	24.88	chr3A	100	64	0	0	1	64	98844566	98844503	6e-25	119
TP44703	3U	24.88	chr3A	100	64	0	0	1	64	99625545	99625482	6e-25	119
TP14491	3U	25.96	chr3A	100	64	0	0	1	64	100188318	100188381	6e-25	119
TP262	3U	25.96	chr3D	98.44	64	1	0	1	64	76921975	76922038	3e-23	113
TP14364	3U	27.42	chr3D	100	64	0	0	1	64	86938764	86938701	6e-25	119
TP3282	3U	27.54	chr3D	98.44	64	1	0	1	64	93248575	93248512	3e-23	113
TP25195	3U	29.25	chr3A	100	57	0	0	1	57	107044733	107044789	5e-21	106
TP37040	3U	29.97	chr3A	100	64	0	0	1	64	106436371	106436308	6e-25	119
TP39240	3U	29.97	chr3D	90.62	64	1	2	1	64	91220662	91220720	3e-13	80.5
TP2971	3U	30.36	chr3D	100	64	0	0	1	64	93258255	93258318	6e-25	119
TP23467	3U	30.7	chr3D	92.06	63	5	0	2	64	94758383	94758321	5e-16	89.8
TP19145	3U	31.84	chr3D	98.41	63	1	0	1	63	99869885	99869823	1e-22	111
TP29548	3U	31.84	chr3B	96.88	64	2	0	1	64	139638041	139637978	1e-21	108
TP29559	3U	31.84	chr3D	93.55	62	4	0	3	64	103447410	103447349	4e-17	93.5
TP5504	3U	33.07	chr3D	98.44	64	1	0	1	64	362887542	362887605	3e-23	113
TP37004	3U	33.15	chr3D	100	64	0	0	1	64	123684608	123684671	6e-25	119
TP38077	3U	33.15	chr3D	100	50	0	0	1	50	94714801	94714752	4e-17	93.5
TP9980	3U	33.15	chr3D	100	64	0	0	1	64	100225307	100225370	6e-25	119
TP10853	3U	33.43	chr3D	100	64	0	0	1	64	170235450	170235387	6e-25	119
TP1749	3U	33.43	chr3D	98.44	64	1	0	1	64	376164969	376164906	3e-23	113
TP18061	3U	33.43	chr3A	96.88	64	2	0	1	64	508772508	508772445	1e-21	108
TP22528	3U	33.43	chr3D	98.41	63	1	0	1	63	105886826	105886764	1e-22	111
TP29954	3U	33.43	chr3A	100	45	0	0	1	45	503753373	503753329	2e-14	84.2
TP33324	3U	33.43	chr3B	100	64	0	0	1	64	236941224	236941161	6e-25	119
TP35334	3U	33.43	chr3A	100	37	0	0	3	39	123053519	123053555	7e-10	69.4
TP36639	3U	33.43	chr3A	100	64	0	0	1	64	502165842	502165905	6e-25	119
TP38090	3U	33.43	chr3B	100	47	0	0	1	47	158904973	158905019	2e-15	87.9
TP38674	3U	33.43	chr3A	97.3	37	1	0	1	37	485007097	485007133	3e-08	63.9
TP40130	3U	33.43	chr3B	95.31	64	3	0	1	64	199661932	199661869	6e-20	102
TP42069	3U	33.43	chr3B	92.54	67	2	1	1	64	181054474	181054540	4e-17	93.5
TP42210	3U	33.43	chr3B	100	40	0	0	1	40	463664012	463663973	1e-11	75
TP46166	3U	33.43	chr3A	100	64	0	0	1	64	483923897	483923834	6e-25	119
TP5923	3U	33.43	chr3A	96.72	61	2	0	4	64	500974049	500974109	6e-20	102
TP17673	3U	33.49	chr3B	93.33	60	3	1	5	64	158907488	158907546	2e-15	87.9
TP18495	3U	33.49	chr3D	96.88	64	2	0	1	64	378541215	378541152	1e-21	108
TP19568	3U	33.49	chr3A	90.91	44	4	0	1	44	502404491	502404448	4e-07	60.2
TP20503	3U	33.49	chr3D	100	42	0	0	3	44	378043617	378043576	1e-12	78.7
TP25084	3U	33.49	chr3A	100	41	0	0	1	41	200681786	200681826	4e-12	76.8
TP26172	3U	33.49	chr3B	100	53	0	0	1	53	159428049	159428101	8e-19	99
TP31364	3U	33.49	chr3B	96.55	58	2	0	1	58	472621436	472621493	3e-18	97.1
TP31649	3U	33.49	chr3B	100	64	0	0	1	64	486037243	486037306	6e-25	119
TP3278	3U	33.49	chr3B	100	64	0	0	1	64	502653955	502654018	6e-25	119
TP33104	3U	33.49	chr3B	98.44	64	1	0	1	64	159272266	159272329	3e-23	113
TP36996	3U	33.49	chr3B	95	60	3	0	1	60	467937413	467937354	1e-17	95.3
TP38742	3U	33.49	chr3A	96.88	64	2	0	1	64	221946787	221946850	1e-21	108
TP5864	3U	33.49	chr3B	100	64	0	0	1	64	486035655	486035592	6e-25	119
TP10032	3U	33.79	chr3D	97.78	45	1	0	1	45	105105451	105105407	1e-12	78.7
TP11273	3U	33.79	chr3B	98.39	62	1	0	1	62	461828960	461829021	4e-22	110
TP14039	3U	33.79	chr3A	98.39	62	1	0	3	64	175626049	175625988	4e-22	110
TP14884	3U	33.79	chr3B	100	63	0	0	1	63	502653958	502653896	2e-24	117
TP1505	3U	33.79	chr3D	98.44	64	1	0	1	64	114323913	114323976	3e-23	113
TP18656	3U	33.79	chr3A	100	47	0	0	1	47	503710556	503710510	2e-15	87.9
TP21958	3U	33.79	chr3D	96.88	64	2	0	1	64	125472942	125473005	1e-21	108
TP25240	3U	33.79	chr3D	100	64	0	0	1	64	374386240	374386303	6e-25	119
TP26683	3U	33.79	chr3D	95.31	64	3	0	1	64	151417292	151417229	6e-20	102
TP28753	3U	33.79	chr3B	100	64	0	0	1	64	540712856	540712793	6e-25	119
TP29569	3U	33.79	chr3D	98.44	64	1	0	1	64	181104207	181104144	3e-23	113
TP30234	3U	33.79	chr3A	96.88	64	1	1	1	64	493720828	493720890	5e-21	106
TP3027	3U	33.79	chr3D	98.11	53	1	0	1	53	105887916	105887968	4e-17	93.5
TP33641	3U	33.79	chr3D	100	64	0	0	1	64	179229176	179229239	6e-25	119
TP35011	3U	33.79	chr3D	96.88	64	1	1	1	64	114661428	114661366	5e-21	106
TP41754	3U	33.79	chr3B	98.44	64	1	0	1	64	492173904	492173967	3e-23	113
TP4857	3U	33.79	chr3D	100	54	0	0	1	54	175552496	175552549	2e-19	100
TP26847	3U	33.85	chr3D	93.62	47	3	0	1	47	423841429	423841475	2e-10	71.3
TP29801	3U	33.85	chr3D	98.44	64	1	0	1	64	108950852	108950915	3e-23	113
TP30247	3U	33.85	chr3D	100	64	0	0	1	64	154178017	154178080	6e-25	119
TP33692	3U	33.85	chr3A	98.44	64	1	0	1	64	345876096	345876033	3e-23	113
TP39723	3U	33.85	chr3B	98.44	64	1	0	1	64	512581992	512582055	3e-23	113
TP43101	3U	33.85	chr3D	95.31	64	3	0	1	64	96408314	96408377	6e-20	102
TP43927	3U	33.85	chr3A	100	64	0	0	1	64	479128957	479128894	6e-25	119
TP19836	3U	34.21	chr3A	95.31	64	3	0	1	64	471278105	471278042	6e-20	102
TP27760	3U	34.21	chr3A	96.88	64	2	0	1	64	517666559	517666496	1e-21	108
TP30567	3U	34.21	chr3D	93.75	64	3	1	1	64	361377914	361377976	1e-17	95.3
TP34868	3U	34.21	chr3A	98.39	62	1	0	1	62	363136045	363136106	4e-22	110
TP10424	3U	34.93	chr3D	100	64	0	0	1	64	422953578	422953515	6e-25	119
TP16866	3U	34.93	chr3B	96.88	64	2	0	1	64	158905470	158905407	1e-21	108
TP33544	3U	34.93	chr3B	98.44	64	1	0	1	64	476916808	476916871	3e-23	113
TP4720	3U	34.93	chr3B	96.88	64	1	1	1	64	541327485	541327423	5e-21	106
TP6716	3U	35.67	chr3B	100	50	0	0	1	50	546078536	546078487	4e-17	93.5
TP20164	3U	36.1	chr3D	100	42	0	0	1	42	429051284	429051243	1e-12	78.7
TP2576	3U	36.1	chr3A	100	42	0	0	1	42	569425131	569425090	1e-12	78.7
TP37752	3U	36.1	chr3A	96.83	63	2	0	2	64	583226153	583226215	5e-21	106
TP42051	3U	36.1	chr3D	98.41	63	1	0	1	63	422655906	422655844	1e-22	111
TP35948	3U	37.26	chr3A	100	42	0	0	1	42	583230478	583230519	1e-12	78.7
TP2826	3U	37.42	chr3A	97.62	42	1	0	4	45	574990872	574990831	5e-11	73.1
TP10082	3U	37.62	chr3B	100	56	0	0	1	56	596274275	596274220	2e-20	104
TP12908	3U	37.62	chr3D	96.72	61	2	0	4	64	454703938	454703878	6e-20	102
TP26522	3U	37.62	chr3D	96.49	57	2	0	1	57	447134098	447134154	1e-17	95.3
TP34337	3U	37.62	chr3A	100	64	0	0	1	64	597853936	597853999	6e-25	119
TP30183	3U	37.75	chr3D	96.88	64	2	0	1	64	433520757	433520820	1e-21	108
TP33363	3U	38.09	chr3D	100	64	0	0	1	64	441181148	441181211	6e-25	119
TP23451	3U	38.34	chr3B	98.44	64	1	0	1	64	571916864	571916927	3e-23	113
TP26628	3U	38.34	chr3D	98.44	64	1	0	1	64	441144408	441144471	3e-23	113
TP4936	3U	38.34	chr3A	89.39	66	2	1	1	61	600669491	600669426	1e-12	78.7
TP5388	3U	38.34	chr3A	100	64	0	0	1	64	581612841	581612778	6e-25	119
TP7246	3U	38.34	chr3A	98.39	62	1	0	2	63	572447866	572447927	4e-22	110
TP922	3U	38.34	chr3B	96.88	64	2	0	1	64	604783621	604783558	1e-21	108
TP13092	3U	39.02	chr3A	98.44	64	1	0	1	64	574013732	574013669	3e-23	113
TP15985	3U	39.02	chr3D	96.88	64	2	0	1	64	455018998	455019061	1e-21	108
TP33295	3U	39.02	chr3A	95.31	64	0	1	1	64	594670118	594670058	8e-19	99
TP805	3U	39.02	chr3A	100	58	0	0	1	58	568002263	568002320	1e-21	108
TP30916	3U	39.05	chr3D	98.44	64	1	0	1	64	460940391	460940454	3e-23	113
TP35319	3U	39.05	chr3D	98.25	57	1	0	1	57	460264912	460264856	2e-19	100
TP42055	3U	39.05	chr3B	93.75	64	4	0	1	64	577951861	577951924	3e-18	97.1
TP43604	3U	39.05	chr3D	98.18	55	0	1	1	54	455050055	455050001	1e-17	95.3
TP5464	3U	39.05	chr3D	98.44	64	1	0	1	64	461388593	461388530	3e-23	113
TP5767	3U	39.05	chr3A	96.36	55	2	0	1	55	572223708	572223762	1e-16	91.6
TP21249	3U	39.35	chr3D	100	64	0	0	1	64	471273758	471273695	6e-25	119
TP25671	3U	39.35	chr3D	92.06	63	4	1	2	64	464812097	464812036	2e-15	87.9
TP31164	3U	39.35	chr3D	95.24	63	2	1	1	62	470492263	470492325	8e-19	99
TP32342	3U	39.35	chr3D	96.88	64	2	0	1	64	464334422	464334359	1e-21	108
TP45246	3U	39.35	chr3B	98.44	64	1	0	1	64	610232869	610232806	3e-23	113
TP20249	3U	39.41	chr3A	100	31	0	0	14	44	613444678	613444648	1e-06	58.4
TP29690	3U	39.41	chr3B	100	39	0	0	1	39	628907649	628907687	5e-11	73.1
TP32757	3U	39.41	chr3B	95.24	63	3	0	2	64	637907201	637907263	2e-19	100
TP38613	3U	39.41	chr3D	100	64	0	0	1	64	474127033	474127096	6e-25	119
TP39837	3U	39.41	chr3D	94.03	67	1	1	1	64	473487646	473487712	8e-19	99
TP5151	3U	39.41	chr3A	98.44	64	1	0	1	64	616288870	616288933	3e-23	113
TP7693	3U	39.71	chr3A	100	59	0	0	1	59	621330880	621330938	4e-22	110
TP33799	3U	39.84	chr3A	98.44	64	0	1	1	64	611700999	611701061	1e-22	111
TP30761	3U	40.07	chr3B	98.44	64	1	0	1	64	692470721	692470658	3e-23	113
TP40788	3U	40.07	chr3D	98.18	55	1	0	1	55	478545219	478545273	3e-18	97.1
TP6470	3U	40.07	chr3D	96.88	64	2	0	1	64	469487906	469487843	1e-21	108
TP13401	3U	40.43	chr3A	98.44	64	1	0	1	64	623401519	623401456	3e-23	113
TP31821	3U	40.43	chr3A	100	64	0	0	1	64	626079133	626079196	6e-25	119
TP32548	3U	40.43	chr3D	100	50	0	0	1	50	494609489	494609440	4e-17	93.5
TP33280	3U	40.43	chr3B	96.88	64	2	0	1	64	644511849	644511912	1e-21	108
TP5583	3U	40.43	chr3A	98.44	64	1	0	1	64	666245122	666245185	3e-23	113
TP30770	3U	40.79	chr3A	100	64	0	0	1	64	633847769	633847832	6e-25	119
TP6190	3U	40.79	chr3B	100	55	0	0	1	55	652849143	652849089	6e-20	102
TP12020	3U	41.58	chr3B	100	62	0	0	1	62	648855357	648855296	8e-24	115
TP3082	3U	41.58	chr3D	100	64	0	0	1	64	482198343	482198280	6e-25	119
TP39387	3U	41.58	chr3A	100	64	0	0	1	64	623811009	623811072	6e-25	119
TP4808	3U	41.58	chr3D	98.44	64	1	0	1	64	489626947	489627010	3e-23	113
TP7472	3U	41.58	chr3D	98.44	64	1	0	1	64	481073998	481074061	3e-23	113
TP32252	3U	41.99	chr3A	100	64	0	0	1	64	634729235	634729172	6e-25	119
TP5765	3U	41.99	chr3A	100	52	0	0	1	52	632557190	632557139	3e-18	97.1
TP12824	3U	43.53	chr3B	100	56	0	0	1	56	655855670	655855615	2e-20	104
TP38895	3U	43.84	chr3D	98.18	55	1	0	10	64	16040307	16040361	3e-18	97.1
TP20213	3U	43.86	chr3A	100	64	0	0	1	64	640751037	640751100	6e-25	119
TP30095	3U	43.86	chr3D	100	64	0	0	1	64	502166392	502166455	6e-25	119
TP4338	3U	43.86	chr3B	95.31	64	3	0	1	64	660233610	660233673	6e-20	102
TP18246	3U	44.19	chr3D	96.88	64	2	0	1	64	501171234	501171171	1e-21	108
TP3571	3U	44.19	chr3B	96.49	57	2	0	1	57	661016430	661016374	1e-17	95.3
TP42945	3U	44.19	chr3D	96.88	64	2	0	1	64	499030005	499030068	1e-21	108
TP13927	3U	44.2	chr3D	90.62	64	2	1	1	64	499871771	499871712	8e-14	82.4
TP24052	3U	44.2	chr3D	98.39	62	1	0	3	64	495928429	495928490	4e-22	110
TP30778	3U	44.2	chr3D	100	64	0	0	1	64	497605053	497605116	6e-25	119
TP21065	3U	44.21	chr3A	100	40	0	0	1	40	642917534	642917573	1e-11	75
TP31111	3U	44.21	chr3A	100	39	0	0	1	39	642384218	642384256	5e-11	73.1
TP26490	3U	44.89	chr3B	96.88	64	2	0	1	64	669949241	669949178	1e-21	108
TP8720	3U	45.22	chr3A	98.44	64	1	0	1	64	645558093	645558030	3e-23	113
TP11341	3U	47.8	chr3A	96.88	64	2	0	1	64	652910203	652910266	1e-21	108
TP12005	3U	47.8	chr3A	100	57	0	0	1	57	649815961	649815905	5e-21	106
TP28763	3U	47.8	chr3B	97.44	39	1	0	1	39	670607436	670607398	2e-09	67.6
TP35092	3U	47.8	chr3A	100	64	0	0	1	64	647482661	647482724	6e-25	119
TP3925	3U	47.8	chr3A	96.55	58	2	0	1	58	648020634	648020577	3e-18	97.1
TP4004	3U	47.8	chr3D	100	64	0	0	1	64	507453395	507453458	6e-25	119
TP43479	3U	47.8	chr3B	100	47	0	0	1	47	671602740	671602694	2e-15	87.9
TP44571	3U	47.8	chr3D	100	64	0	0	1	64	516884685	516884748	6e-25	119
TP44714	3U	47.8	chr3D	98.21	56	1	0	9	64	514268850	514268905	8e-19	99
TP4480	3U	47.8	chr3B	91.67	60	5	0	1	60	670617893	670617952	2e-14	84.2
TP26327	3U	47.98	chr3A	98.44	64	1	0	1	64	649938284	649938221	3e-23	113
TP35461	3U	47.98	chr3D	98.36	61	1	0	1	61	512755185	512755245	1e-21	108
TP37873	3U	47.98	chr3D	98.44	64	0	1	1	64	518163477	518163539	1e-22	111
TP42665	3U	47.98	chr3A	100	38	0	0	2	39	301130129	301130092	2e-10	71.3
TP33617	3U	48.31	chr3B	98.44	64	1	0	1	64	677702443	677702380	3e-23	113
TP10338	3U	50.1	chr3A	100	63	0	0	2	64	653909359	653909297	2e-24	117
TP14869	3U	50.1	chr3D	96.83	63	2	0	2	64	526986489	526986551	5e-21	106
TP27492	3U	50.1	chr3D	100	64	0	0	1	64	536007212	536007275	6e-25	119
TP32664	3U	50.1	chr3B	98	50	1	0	1	50	698564072	698564023	2e-15	87.9
TP37807	3U	50.1	chr3D	95.74	47	2	0	1	47	518319734	518319780	4e-12	76.8
TP39053	3U	50.1	chr3A	100	64	0	0	1	64	659555413	659555350	6e-25	119
TP42162	3U	50.1	chr3A	98.44	64	1	0	1	64	659942146	659942083	3e-23	113
TP43347	3U	50.1	chr3A	93.33	60	4	0	5	64	662812347	662812406	5e-16	89.8
TP5749	3U	50.1	chr3D	93.62	47	2	1	1	47	526985050	526985095	7e-10	69.4
TP9605	3U	50.1	chr3A	100	64	0	0	1	64	664137316	664137379	6e-25	119
TP13921	3U	50.28	chr3D	100	64	0	0	1	64	529800344	529800281	6e-25	119
TP18350	3U	50.28	chr3D	92.16	51	4	0	14	64	527698777	527698727	5e-11	73.1
TP18481	3U	50.28	chr3D	90.62	64	6	0	1	64	531369697	531369634	6e-15	86.1
TP30817	3U	50.28	chr3A	100	63	0	0	2	64	659404555	659404617	2e-24	117
TP32954	3U	50.28	chr3A	100	64	0	0	1	64	660510677	660510740	6e-25	119
TP37625	3U	50.28	chr3A	100	64	0	0	1	64	659555695	659555758	6e-25	119
TP38950	3U	50.28	chr3B	100	64	0	0	1	64	695957589	695957526	6e-25	119
TP39769	3U	50.28	chr3A	96.49	57	2	0	1	57	658990650	658990594	1e-17	95.3
TP40599	3U	50.28	chr3D	98.44	64	1	0	1	64	524204958	524205021	3e-23	113
TP1256	3U	51.62	chr3D	100	64	0	0	1	64	550953161	550953098	6e-25	119
TP13115	3U	51.62	chr3D	93.75	64	4	0	1	64	552256594	552256657	3e-18	97.1
TP15986	3U	51.62	chr3A	96.88	64	2	0	1	64	690860283	690860346	1e-21	108
TP1808	3U	51.62	chr3D	96.43	56	2	0	2	57	552738774	552738829	4e-17	93.5
TP18372	3U	51.62	chr3A	98.28	58	1	0	1	58	684697738	684697795	6e-20	102
TP20088	3U	51.62	chr3A	96.08	51	2	0	1	51	682986166	682986216	2e-14	84.2
TP24153	3U	51.62	chr3B	100	64	0	0	1	64	720852953	720853016	6e-25	119
TP25131	3U	51.62	chr3D	100	64	0	0	1	64	550669359	550669296	6e-25	119
TP25397	3U	51.62	chr3B	95.31	64	3	0	1	64	726236203	726236266	6e-20	102
TP27179	3U	51.62	chr3A	100	61	0	0	1	61	690196693	690196753	3e-23	113
TP31977	3U	51.62	chr3D	95.31	64	3	0	1	64	546252708	546252771	6e-20	102
TP32865	3U	51.62	chr3A	96.88	64	2	0	1	64	689134865	689134802	1e-21	108
TP33730	3U	51.62	chr3A	96.88	64	2	0	1	64	686254762	686254699	1e-21	108
TP420	3U	51.62	chr3B	98.44	64	1	0	1	64	728905793	728905730	3e-23	113
TP4355	3U	51.62	chr3D	93.75	64	4	0	1	64	552789379	552789442	3e-18	97.1
TP4800	3U	51.62	chr3D	100	50	0	0	1	50	553686537	553686488	4e-17	93.5
TP5136	3U	51.62	chr3A	98.41	63	1	0	2	64	682978039	682978101	1e-22	111
TP12160	3U	52.36	chr3B	96.88	64	2	0	1	64	737248853	737248790	1e-21	108
TP24505	3U	52.36	chr3A	98.36	61	1	0	1	61	693180654	693180714	1e-21	108
TP38074	3U	52.36	chr3A	98.44	64	1	0	1	64	693194290	693194227	3e-23	113
TP39626	3U	52.36	chr3D	100	64	0	0	1	64	558003420	558003357	6e-25	119
TP7943	3U	52.36	chr3B	96.61	59	2	0	1	59	739035093	739035035	8e-19	99
TP14955	3U	52.41	chr3D	96.23	53	2	0	12	64	553435624	553435572	2e-15	87.9
TP26887	3U	52.41	chr3D	98.11	53	1	0	2	54	546708058	546708110	4e-17	93.5
TP29577	3U	52.41	chr3A	98.44	64	1	0	1	64	628728548	628728485	3e-23	113
TP34798	3U	52.41	chr3D	96.88	64	2	0	1	64	556207769	556207706	1e-21	108
TP4166	3U	52.41	chr3B	93.75	64	4	0	1	64	737521271	737521334	3e-18	97.1
TP42324	3U	52.41	chr3A	98.44	64	1	0	1	64	686749227	686749290	3e-23	113
TP42642	3U	52.41	chr3D	96.88	64	1	1	1	64	554410788	554410850	5e-21	106
TP43525	3U	52.41	chr3D	98.44	64	1	0	1	64	557965621	557965558	3e-23	113
TP8113	3U	52.41	chr3B	96.88	64	2	0	1	64	740952556	740952619	1e-21	108
TP22271	3U	52.63	chr3D	96.88	64	2	0	1	64	550953423	550953360	1e-21	108
TP25722	3U	52.63	chr3B	93.75	64	4	0	1	64	725973971	725973908	3e-18	97.1
TP27599	3U	52.63	chr3A	96.88	64	2	0	1	64	691769551	691769614	1e-21	108
TP3392	3U	52.63	chr3D	98.44	64	1	0	1	64	557728104	557728167	3e-23	113
TP39212	3U	52.63	chr3B	100	51	0	0	1	51	740750564	740750514	1e-17	95.3
TP39218	3U	52.63	chr3D	96.88	64	2	0	1	64	557679457	557679394	1e-21	108
TP6484	3U	52.63	chr3B	100	30	0	0	1	30	736651438	736651467	5e-06	56.5
TP11753	3U	53.09	chr3D	100	46	0	0	1	46	557682737	557682692	6e-15	86.1
TP27773	3U	53.09	chr3B	95.31	64	3	0	1	64	744039761	744039824	6e-20	102
TP5069	3U	53.09	chr3D	100	62	0	0	1	62	558289211	558289150	8e-24	115
TP13486	3U	53.37	chr3A	100	55	0	0	1	55	695130667	695130613	6e-20	102
TP13438	3U	54.04	chr3D	98.44	64	1	0	1	64	558952065	558952002	3e-23	113
TP18742	3U	56.12	chr3A	98.44	64	1	0	1	64	699533929	699533866	3e-23	113
TP34258	3U	56.12	chr3B	100	64	0	0	1	64	749359950	749360013	6e-25	119
TP14836	3U	56.46	chr3B	96.88	64	2	0	1	64	718675311	718675374	1e-21	108
TP18595	3U	56.46	chr3B	90.62	64	0	1	1	64	746296132	746296075	3e-13	80.5
TP41378	3U	56.46	chr3A	96.83	63	2	0	1	63	697568743	697568805	5e-21	106
TP1597	3U	56.8	chr3D	100	48	0	0	1	48	562641079	562641032	5e-16	89.8
TP36201	3U	56.8	chr3A	94.55	55	3	0	10	64	697062919	697062865	6e-15	86.1
TP22515	3U	57.8	chr3B	96.88	64	2	0	1	64	752058204	752058267	1e-21	108
TP33756	3U	62.37	chr3D	95.31	64	3	0	1	64	569536964	569537027	6e-20	102
TP18618	3U	62.85	chr3D	98.08	52	1	0	1	52	567229062	567229113	1e-16	91.6
TP1641	3U	64.37	chr3A	96.72	61	2	0	1	61	702570607	702570667	6e-20	102
TP36826	3U	64.37	chr3B	96.88	64	2	0	1	64	755165282	755165219	1e-21	108
TP40424	3U	64.37	chr3A	96.88	64	2	0	1	64	708005393	708005330	1e-21	108
TP8727	3U	64.86	chr3A	95.08	61	3	0	4	64	705294028	705294088	3e-18	97.1
TP18049	3U	65.53	chr3B	96.88	64	2	0	1	64	758629280	758629343	1e-21	108
TP5712	3U	65.53	chr3B	97.22	36	1	0	1	36	805711565	805711600	1e-07	62.1
TP39049	3U	66.12	chr3A	95.31	64	3	0	1	64	706634235	706634298	6e-20	102
TP28861	3U	67.62	chr3B	100	55	0	0	1	55	763195836	763195890	6e-20	102
TP7271	3U	67.62	chr3D	100	64	0	0	1	64	574237050	574236987	6e-25	119
TP37886	3U	68.62	chr3B	88.52	61	7	0	1	61	759502247	759502307	1e-11	75
TP2193	3U	69.14	chr3B	96.88	64	2	0	1	64	763587796	763587859	1e-21	108
TP33288	3U	69.14	chr3D	96.88	64	2	0	1	64	573863451	573863388	1e-21	108
TP25806	3U	69.86	chr3A	98.44	64	1	0	1	64	711385569	711385506	3e-23	113
TP1134	3U	70.7	chr3B	96.67	60	2	0	3	62	766254183	766254242	2e-19	100
TP31478	3U	70.7	chr3A	100	64	0	0	1	64	711297238	711297175	6e-25	119
TP34793	3U	70.7	chr3A	95.24	63	2	1	1	62	710887879	710887941	8e-19	99
TP5442	3U	70.7	chr3D	92.19	64	5	0	1	64	559587059	559586996	1e-16	91.6
TP7076	3U	70.7	chr3D	100	64	0	0	1	64	578151630	578151693	6e-25	119
TP9324	3U	70.7	chr3B	100	64	0	0	1	64	769905461	769905524	6e-25	119
TP35059	3U	72.81	chr3A	100	64	0	0	1	64	714947616	714947553	6e-25	119
TP36321	3U	72.81	chr3B	91.84	49	0	3	4	48	771670280	771670232	8e-09	65.8
TP46096	3U	72.81	chr3A	95.38	65	2	1	1	64	170979782	170979846	6e-20	102
TP6807	3U	72.81	chr3D	98.44	64	1	0	1	64	578113745	578113682	3e-23	113
TP1049	3U	73.46	chr3D	96	50	2	0	1	50	579982645	579982694	8e-14	82.4
TP35043	3U	73.46	chr3A	93.75	48	3	0	1	48	744940662	744940615	5e-11	73.1
TP40355	3U	73.46	chr3D	98.44	64	1	0	1	64	580422760	580422823	3e-23	113
TP200	3U	73.96	chr3D	100	64	0	0	1	64	580219113	580219176	6e-25	119
TP19770	3U	74.32	chr3D	95.31	64	3	0	1	64	581840447	581840384	6e-20	102
TP1667	3U	75.04	chr3D	100	43	0	0	1	43	581996673	581996631	3e-13	80.5
TP28327	3U	75.54	chr3D	98.44	64	1	0	1	64	582887554	582887491	3e-23	113
TP37632	3U	76.91	chr3D	98.44	64	1	0	1	64	584058152	584058089	3e-23	113
TP14436	3U	78.22	chr3D	96.88	64	2	0	1	64	586964937	586964874	1e-21	108
TP16657	3U	78.22	chr3B	93.75	64	3	1	1	63	780335724	780335787	1e-17	95.3
TP27943	3U	78.22	chr3B	100	64	0	0	1	64	778888180	778888243	6e-25	119
TP26301	3U	78.56	chr3D	100	29	0	0	1	29	587436511	587436539	2e-05	54.7
TP29945	3U	79.57	chr3D	95.24	42	1	1	1	41	589865266	589865225	8e-09	65.8
TP31245	3U	79.57	chr3B	100	44	0	0	1	44	783192479	783192436	8e-14	82.4
TP37444	3U	79.57	chr3D	98.44	64	1	0	1	64	587055195	587055258	3e-23	113
TP26328	3U	80.94	chr3A	95.31	64	3	0	1	64	717854357	717854294	6e-20	102
TP25056	3U	80.98	chr3D	100	64	0	0	1	64	588518315	588518252	6e-25	119
TP33055	3U	80.98	chr3B	100	64	0	0	1	64	786354636	786354573	6e-25	119
TP23285	3U	81.3	chr3D	98.41	63	0	1	2	64	588375210	588375271	4e-22	110
TP4711	3U	82.02	chr3B	92	50	4	0	3	52	785776963	785776914	2e-10	71.3
TP24822	3U	82.74	chr3D	97.83	46	1	0	1	46	9650829	9650784	3e-13	80.5
TP38711	3U	82.74	chr3A	100	64	0	0	1	64	720232013	720232076	6e-25	119
TP38713	3U	82.74	chr3A	100	64	0	0	1	64	719937220	719937283	6e-25	119
TP14118	3U	83.89	chr3A	100	64	0	0	1	64	721260774	721260711	6e-25	119
TP22240	3U	84.07	chr3D	95.31	64	3	0	1	64	590951383	590951320	6e-20	102
TP13339	3U	84.61	chr3B	100	37	0	0	1	37	791763996	791763960	7e-10	69.4
TP11763	3U	86.48	chr3D	88.89	63	2	1	1	63	592606177	592606234	5e-11	73.1
TP17051	3U	86.84	chr3B	90.48	63	2	3	6	64	794066384	794066322	3e-13	80.5
TP25059	3U	87.63	chr3A	98.46	65	0	1	1	64	724541705	724541769	3e-23	113
TP26781	3U	88.23	chr3D	98.44	64	1	0	1	64	595024454	595024391	3e-23	113
TP4278	3U	88.56	chr3D	100	64	0	0	1	64	595024451	595024514	6e-25	119
TP4405	3U	88.56	chr3A	96.88	64	2	0	1	64	725880658	725880595	1e-21	108
TP6418	3U	88.56	chr3B	96.55	58	2	0	1	58	796996600	796996543	3e-18	97.1
TP13594	3U	91.12	chr3D	98.44	64	1	0	1	64	597273477	597273414	3e-23	113
TP1529	3U	91.12	chr3A	96.88	64	2	0	1	64	727486275	727486338	1e-21	108
TP26124	3U	91.12	chr3B	95.31	64	3	0	1	64	803755334	803755397	6e-20	102
TP37542	3U	92.07	chr3A	98.08	52	1	0	1	52	729897959	729897908	1e-16	91.6
TP24748	3U	94.22	chr3B	100	64	0	0	1	64	809771125	809771062	6e-25	119
TP2933	3U	94.22	chr3B	98.31	59	1	0	6	64	29195310	29195368	2e-20	104
TP45243	3U	94.22	chr3B	100	64	0	0	1	64	807929796	807929733	6e-25	119
TP3469	3U	96.62	chr3D	97.06	34	1	0	31	64	611549287	611549320	1e-06	58.4
TP21569	3U	97.36	chr3D	100	64	0	0	1	64	614211058	614210995	6e-25	119
TP43674	3U	97.7	chr3A	100	47	0	0	1	47	750838915	750838869	2e-15	87.9
TP13666	3U	98	chr3A	98.44	64	1	0	1	64	739698969	739699032	3e-23	113
TP4492	3U	98	chr3A	100	64	0	0	1	64	739558987	739558924	6e-25	119
TP988	3U	98.76	chr3D	100	47	0	0	1	47	605477263	605477217	2e-15	87.9
TP7226	3U	98.77	chr3A	96.88	64	2	0	1	64	745898891	745898828	1e-21	108
TP32756	3U	99.48	chr3B	100	64	0	0	1	64	812659571	812659508	6e-25	119
TP33490	3U	99.48	chr3D	85.25	61	5	1	4	64	606609385	606609329	4e-07	60.2
TP9427	3U	99.48	chr3D	100	43	0	0	1	43	606143039	606142997	3e-13	80.5
TP16472	3U	99.84	chr3D	100	64	0	0	1	64	609239855	609239918	6e-25	119
TP25821	3U	99.84	chr3A	100	39	0	0	1	39	743377588	743377626	5e-11	73.1
TP397	3U	99.84	chr3A	98.44	64	1	0	1	64	739391807	739391744	3e-23	113
TP44088	3U	99.84	chr3A	93.75	64	1	3	1	64	741854790	741854850	4e-17	93.5
TP5964	3U	99.84	chr3B	100	47	0	0	1	47	814765883	814765837	2e-15	87.9
TP11874	3U	100.2	chr3D	98.46	65	0	1	1	64	608410711	608410647	3e-23	113
TP22243	3U	100.2	chr3D	98.31	59	1	0	1	59	608614215	608614157	2e-20	104
TP30696	3U	100.2	chr3D	96.55	58	2	0	2	59	609874373	609874430	3e-18	97.1
TP35490	3U	100.2	chr3D	98.28	58	1	0	7	64	608614209	608614152	6e-20	102
TP43210	3U	100.2	chr3B	92.42	66	3	1	1	64	819350913	819350848	4e-17	93.5
TP12635	3U	102.07	chr3B	95.24	63	3	0	2	64	816152372	816152310	2e-19	100
TP24221	3U	103.15	chr3B	100	39	0	0	11	49	817415835	817415873	5e-11	73.1
TP42950	3U	103.51	chr3D	98.44	64	1	0	1	64	609906465	609906402	3e-23	113
TP1078	3U	105.02	chr3B	91.8	61	3	1	1	61	820337202	820337144	2e-14	84.2
TP11973	3U	107.32	chr3B	95.31	64	3	0	1	64	825140575	825140638	6e-20	102
TP11644	3U	110.28	chr3B	100	55	0	0	1	55	822085545	822085491	6e-20	102
TP4664	3U	110.28	chr3A	100	62	0	0	1	62	750290107	750290046	8e-24	115
TP41368	3U	110.64	chr3B	100	64	0	0	1	64	824374614	824374677	6e-25	119
TP18988	4U	0	chr4A	98.44	64	1	0	1	64	539127025	539126962	3e-23	113
TP33580	4U	0	chr4D	98.44	64	1	0	1	64	47659869	47659932	3e-23	113
TP40450	4U	0	chr4D	89.06	64	7	0	1	64	10744834	10744897	3e-13	80.5
TP44919	4U	0	chr4D	97.96	49	0	1	2	50	51006893	51006846	2e-14	84.2
TP43630	4U	0.36	chr4D	96.3	54	2	0	1	54	10475415	10475362	5e-16	89.8
TP42514	4U	3.16	chr4D	98.41	63	1	0	1	63	43615633	43615695	1e-22	111
TP38370	4U	3.83	chr4D	96.88	64	2	0	1	64	58651685	58651622	1e-21	108
TP670	4U	3.83	chr4B	100	36	0	0	29	64	95858022	95858057	2e-09	67.6
TP5008	4U	4.84	chr4A	100	59	0	0	2	60	530815381	530815323	4e-22	110
TP22238	4U	6.18	chr4D	97.83	46	1	0	1	46	63589208	63589253	3e-13	80.5
TP38670	4U	8.19	chr4A	98.44	64	1	0	1	64	499354973	499355036	3e-23	113
TP5738	4U	8.19	chr4B	100	64	0	0	1	64	105350255	105350318	6e-25	119
TP5999	4U	8.19	chr4B	98.44	64	1	0	1	64	184301558	184301621	3e-23	113
TP6316	4U	8.19	chr4B	98.44	64	1	0	1	64	109400329	109400266	3e-23	113
TP1273	4U	9.34	chr4B	100	62	0	0	1	62	55305781	55305720	8e-24	115
TP2234	4U	9.67	chr4D	98.44	64	1	0	1	64	37944862	37944799	3e-23	113
TP3440	4U	9.67	chr4D	96.83	63	2	0	1	63	41731358	41731420	5e-21	106
TP24658	4U	10.35	chr4B	96.88	64	2	0	1	64	39310462	39310525	1e-21	108
TP4651	4U	10.35	chr4B	93.85	65	2	2	1	64	40224960	40224897	3e-18	97.1
TP18475	4U	10.68	chr4D	100	42	0	0	1	42	31434997	31435038	1e-12	78.7
TP25359	4U	10.68	chr4B	98.44	64	1	0	1	64	44953643	44953706	3e-23	113
TP39858	4U	11.35	chr4A	91.04	67	3	1	1	64	576047892	576047958	2e-15	87.9
TP26623	4U	15.25	chr4D	100	64	0	0	1	64	16449318	16449255	6e-25	119
TP41057	4U	15.59	chr4B	93.75	64	1	1	1	64	28324090	28324150	4e-17	93.5
TP43303	4U	44.26	chr4A	100	54	0	0	11	64	589600434	589600487	2e-19	100
TP16998	4U	45.74	chr4D	100	29	0	0	23	51	6943016	6943044	2e-05	54.7
TP2151	4U	45.74	chr4D	88.41	69	3	1	1	64	7467734	7467802	1e-12	78.7
TP23887	4U	45.74	chr4B	95.24	63	2	1	1	63	12141990	12142051	8e-19	99
TP5758	4U	45.74	chr4D	100	35	0	0	4	38	7883946	7883912	8e-09	65.8
TP3218	4U	48.23	chr4A	92.19	64	1	3	1	64	595043486	595043427	2e-15	87.9
TP42321	4U	48.23	chr4D	100	62	0	0	1	62	8619502	8619441	8e-24	115
TP40735	4U	51.94	chr4A	92.19	64	5	0	1	64	596826937	596827000	1e-16	91.6
TP11289	4U	53.2	chr4B	98.21	56	1	0	8	63	4898896	4898951	8e-19	99
TP31250	4U	53.2	chr4D	100	64	0	0	1	64	4489327	4489264	6e-25	119
TP29371	4U	53.38	chr4B	97.37	38	1	0	27	64	9388631	9388668	8e-09	65.8
TP6597	4U	53.38	chr4A	98.44	64	1	0	1	64	597734118	597734055	3e-23	113
TP6790	4U	53.38	chr4B	95.31	64	3	0	1	64	4308886	4308823	6e-20	102
TP22072	4U	53.56	chr4D	96.88	64	2	0	1	64	4271533	4271596	1e-21	108
TP28337	4U	53.56	chr4B	95.45	44	2	0	1	44	3785733	3785690	2e-10	71.3
TP32325	4U	53.56	chr4D	100	64	0	0	1	64	5812308	5812245	6e-25	119
TP36603	4U	53.56	chr4A	100	37	0	0	1	37	598148299	598148335	7e-10	69.4
TP7796	4U	53.56	chr4D	100	64	0	0	1	64	3293465	3293528	6e-25	119
TP19508	4U	53.87	chr4D	100	44	0	0	1	44	3280016	3279973	8e-14	82.4
TP22263	4U	53.87	chr4A	98.44	64	1	0	1	64	601155447	601155510	3e-23	113
TP3357	4U	53.87	chr4D	98.39	62	1	0	3	64	5662007	5661946	4e-22	110
TP8945	4U	53.87	chr4D	98.33	60	1	0	2	61	6288040	6288099	5e-21	106
TP28332	4U	53.9	chr4A	100	53	0	0	1	53	603030929	603030877	8e-19	99
TP38697	4U	53.9	chr4D	97.87	47	1	0	1	47	3291916	3291962	8e-14	82.4
TP4381	4U	53.9	chr4D	96.88	64	2	0	1	64	3109172	3109235	1e-21	108
TP1910	4U	54.23	chr4B	98.28	58	1	0	1	58	2213400	2213457	6e-20	102
TP34599	4U	54.23	chr4B	96.88	64	2	0	1	64	3860293	3860356	1e-21	108
TP24028	4U	57.32	chr4B	98.41	63	1	0	2	64	40906708	40906646	1e-22	111
TP42034	4U	57.52	chr4D	98.31	59	1	0	1	59	394296083	394296025	2e-20	104
TP1445	4U	62.09	chr4D	96.88	64	2	0	1	64	75551041	75550978	1e-21	108
TP12687	4U	62.43	chr4B	95.31	64	3	0	1	64	605560128	605560065	6e-20	102
TP3058	4U	62.43	chr4A	96.88	64	1	1	1	64	608149987	608150049	5e-21	106
TP22040	4U	66.98	chr4A	89.55	67	4	2	1	64	713605545	713605479	8e-14	82.4
TP949	4U	81.66	chr4A	93.33	45	2	1	10	53	742383670	742383714	8e-09	65.8
TP30232	4U	86.35	chr4A	96.77	62	2	0	3	64	666257752	666257691	2e-20	104
TP37663	4U	86.35	chr4A	100	64	0	0	1	64	599835774	599835837	6e-25	119
TP13188	4U	88.51	chr4A	98.44	64	1	0	1	64	734925032	734924969	3e-23	113
TP23448	4U	88.51	chr4D	98.44	64	1	0	1	64	504876397	504876460	3e-23	113
TP18462	4U	91.28	chr4A	94.64	56	3	0	1	56	45372028	45371973	2e-15	87.9
TP36778	4U	91.28	chr4A	100	54	0	0	1	54	700735259	700735312	2e-19	100
TP19041	4U	91.56	chr4A	96.72	61	2	0	1	61	195017671	195017731	6e-20	102
TP36811	4U	103.96	chr4A	96.88	64	2	0	1	64	375949439	375949376	1e-21	108
TP45594	4U	104.29	chr4A	100	64	0	0	1	64	725847247	725847184	6e-25	119
TP31106	4U	105.3	chr4D	97.22	36	1	0	28	63	507753955	507753920	1e-07	62.1
TP33872	4U	105.3	chr4D	89.23	65	3	1	1	61	389566954	389566890	1e-12	78.7
TP18596	4U	109.57	chr4A	100	29	0	0	6	34	669778184	669778212	2e-05	54.7
TP14187	4U	136.17	chr4D	92.19	64	5	0	1	64	127176034	127175971	1e-16	91.6
TP21078	4U	146.25	chr4A	100	64	0	0	1	64	387059884	387059821	6e-25	119
TP35158	4U	146.25	chr4B	100	48	0	0	1	48	24907591	24907638	5e-16	89.8
TP40304	4U	146.25	chr4D	97.73	44	1	0	1	44	15593454	15593411	4e-12	76.8
TP8181	4U	146.25	chr4A	94.55	55	3	0	1	55	589008708	589008762	6e-15	86.1
TP22716	4U	147.17	chr4B	100	46	0	0	1	46	22193463	22193418	6e-15	86.1
TP35511	4U	147.17	chr4A	98.39	62	1	0	1	62	585401068	585401129	4e-22	110
TP35672	4U	147.17	chr4D	96.88	64	2	0	1	64	9496862	9496799	1e-21	108
TP36909	4U	147.17	chr4D	97.44	39	1	0	1	39	16157152	16157114	2e-09	67.6
TP5430	4U	147.17	chr4B	96.88	64	2	0	1	64	25275799	25275862	1e-21	108
TP10195	5U	0.67	chr5D	91.8	61	2	2	1	61	3371435	3371378	8e-14	82.4
TP30661	5U	1.34	chr5A	98.33	60	1	0	1	60	1049488	1049429	5e-21	106
TP5778	5U	3.63	chr5A	97.44	39	1	0	1	39	1600959	1600997	2e-09	67.6
TP10212	5U	3.97	chr5A	92.5	40	2	1	15	54	4294695	4294657	5e-06	56.5
TP13545	5U	3.97	chr5D	97.87	47	1	0	1	47	6693231	6693185	8e-14	82.4
TP22960	5U	3.97	chr5D	97.78	45	1	0	1	45	6693228	6693272	1e-12	78.7
TP30534	5U	3.97	chr5D	98.44	64	1	0	1	64	5577621	5577684	3e-23	113
TP43819	5U	3.97	chr5B	98.44	64	1	0	1	64	48303630	48303693	3e-23	113
TP9916	5U	11.59	chr5A	96.88	64	2	0	1	64	8505390	8505327	1e-21	108
TP319	5U	33.5	chr5D	100	64	0	0	1	64	21009477	21009414	6e-25	119
TP4426	5U	34.17	chr5D	95.08	61	3	0	4	64	13820034	13820094	3e-18	97.1
TP2813	5U	34.22	chr5D	97.44	39	1	0	11	49	561529417	561529379	2e-09	67.6
TP28235	5U	35.41	chr5A	93.75	64	4	0	1	64	682711901	682711964	3e-18	97.1
TP26483	5U	35.77	chr5A	98.28	58	1	0	7	64	678201842	678201899	6e-20	102
TP25506	5U	37.67	chr5D	96.88	64	2	0	1	64	22435729	22435666	1e-21	108
TP39916	5U	37.67	chr5A	100	64	0	0	1	64	17282133	17282196	6e-25	119
TP15520	5U	37.96	chr5A	93.75	64	1	1	1	64	678202337	678202397	4e-17	93.5
TP16841	5U	37.96	chr5A	97.14	35	1	0	30	64	476892728	476892694	4e-07	60.2
TP17277	5U	37.96	chr5D	98.44	64	1	0	1	64	3004424	3004487	3e-23	113
TP18283	5U	37.96	chr5A	95.35	43	2	0	4	46	663393711	663393669	7e-10	69.4
TP19832	5U	37.96	chr5A	96.88	64	2	0	1	64	704521222	704521159	1e-21	108
TP20830	5U	37.96	chr5A	100	36	0	0	1	36	678219117	678219082	2e-09	67.6
TP30841	5U	37.96	chr5A	96.88	64	2	0	1	64	702166496	702166559	1e-21	108
TP33338	5U	37.96	chr5A	95.31	64	3	0	1	64	667105960	667106023	6e-20	102
TP8792	5U	37.96	chr5A	94.92	59	3	0	1	59	673928537	673928595	4e-17	93.5
TP30960	5U	38.45	chr5A	98.44	64	1	0	1	64	663102313	663102376	3e-23	113
TP13153	5U	39.08	chr5D	100	64	0	0	1	64	26711046	26710983	6e-25	119
TP15500	5U	39.08	chr5A	95.52	67	0	1	1	64	18054311	18054245	2e-20	104
TP23942	5U	39.08	chr5B	100	30	0	0	35	64	17939207	17939236	5e-06	56.5
TP19834	5U	39.11	chr5A	96.88	64	2	0	1	64	687738479	687738416	1e-21	108
TP2243	5U	39.11	chr5A	95.31	64	3	0	1	64	687760328	687760265	6e-20	102
TP1773	5U	39.82	chr5B	98.44	64	1	0	1	64	20628549	20628612	3e-23	113
TP14517	5U	39.83	chr5A	92.42	66	2	2	1	64	665978527	665978591	1e-16	91.6
TP18484	5U	39.83	chr5B	98.44	64	1	0	1	64	660248226	660248289	3e-23	113
TP23870	5U	39.83	chr5A	96.88	64	2	0	1	64	665983743	665983680	1e-21	108
TP12037	5U	40.55	chr5B	100	38	0	0	1	38	21405652	21405689	2e-10	71.3
TP5967	5U	40.55	chr5B	100	63	0	0	1	63	18335721	18335783	2e-24	117
TP40558	5U	41.29	chr5A	100	56	0	0	1	56	17571511	17571566	2e-20	104
TP45717	5U	42.5	chr5B	98.44	64	1	0	1	64	605166032	605165969	3e-23	113
TP22000	5U	42.61	chr5A	100	61	0	0	4	64	697779001	697778941	3e-23	113
TP15447	5U	42.71	chr5D	98.36	61	1	0	1	61	524923420	524923480	1e-21	108
TP16976	5U	42.71	chr5A	100	44	0	0	1	44	651579154	651579111	8e-14	82.4
TP23724	5U	42.71	chr5D	100	53	0	0	1	53	525811508	525811456	8e-19	99
TP32712	5U	42.71	chr5B	100	64	0	0	1	64	661299374	661299311	6e-25	119
TP2374	5U	42.78	chr5D	100	64	0	0	1	64	520068241	520068304	6e-25	119
TP29908	5U	42.78	chr5D	100	49	0	0	1	49	518872829	518872781	1e-16	91.6
TP36499	5U	42.78	chr5A	96.36	55	2	0	1	55	3063334	3063388	1e-16	91.6
TP26867	5U	43.04	chr5D	96.88	64	2	0	1	64	35653603	35653666	1e-21	108
TP37238	5U	43.04	chr5B	96.88	64	2	0	1	64	25331714	25331651	1e-21	108
TP3342	5U	43.07	chr5A	100	43	0	0	1	43	662358290	662358332	3e-13	80.5
TP36720	5U	43.43	chr5D	100	64	0	0	1	64	524519998	524519935	6e-25	119
TP4199	5U	43.43	chr5D	91.94	62	5	0	1	62	524240711	524240772	2e-15	87.9
TP4860	5U	43.43	chr5A	98.44	64	1	0	1	64	651327633	651327570	3e-23	113
TP10642	5U	43.5	chr5D	98.18	55	1	0	1	55	491668967	491669021	3e-18	97.1
TP16990	5U	43.79	chr5A	100	64	0	0	1	64	648857981	648857918	6e-25	119
TP3189	5U	43.79	chr5A	100	39	0	0	1	39	650838340	650838378	5e-11	73.1
TP32945	5U	43.79	chr5A	98.28	58	1	0	1	58	650139654	650139711	6e-20	102
TP3344	5U	43.79	chr5A	96.88	64	2	0	1	64	650671260	650671197	1e-21	108
TP34767	5U	43.79	chr5A	92.59	54	0	2	3	52	657482443	657482390	1e-11	75
TP38379	5U	43.79	chr5D	96.15	52	2	0	3	54	524127297	524127246	6e-15	86.1
TP40244	5U	43.79	chr5D	98.41	63	1	0	2	64	524529916	524529854	1e-22	111
TP41172	5U	43.79	chr5A	100	64	0	0	1	64	653703724	653703661	6e-25	119
TP4158	5U	43.79	chr5A	98.44	64	1	0	1	64	657201060	657200997	3e-23	113
TP7735	5U	43.79	chr5D	100	42	0	0	1	42	523516061	523516020	1e-12	78.7
TP1860	5U	43.84	chr5B	100	64	0	0	1	64	606853315	606853378	6e-25	119
TP22431	5U	43.84	chr5D	100	64	0	0	1	64	491660257	491660194	6e-25	119
TP20203	5U	43.89	chr5B	100	57	0	0	1	57	636896344	636896288	5e-21	106
TP6284	5U	43.89	chr5A	100	64	0	0	1	64	627785983	627785920	6e-25	119
TP11508	5U	44.51	chr5A	96.88	64	2	0	1	64	26617085	26617022	1e-21	108
TP42457	5U	44.51	chr5D	94.03	67	1	1	1	64	37352405	37352339	8e-19	99
TP5178	5U	44.51	chr5A	100	38	0	0	1	38	26928087	26928050	2e-10	71.3
TP10756	5U	45.3	chr5B	96.88	64	2	0	1	64	641805640	641805577	1e-21	108
TP14053	5U	45.3	chr5B	94.74	38	1	1	1	37	638397819	638397782	1e-06	58.4
TP17233	5U	45.3	chr5B	98.44	64	1	0	1	64	638606093	638606156	3e-23	113
TP19167	5U	45.3	chr5A	96.88	64	2	0	1	64	680363989	680364052	1e-21	108
TP21069	5U	45.3	chr5B	98.41	63	1	0	2	64	41080363	41080425	1e-22	111
TP22794	5U	45.3	chr5D	93.75	64	4	0	1	64	509590109	509590172	3e-18	97.1
TP24417	5U	45.3	chr5D	93.75	64	4	0	1	64	509020520	509020583	3e-18	97.1
TP25579	5U	45.3	chr5D	96.88	64	2	0	1	64	507768880	507768817	1e-21	108
TP3144	5U	45.3	chr5B	98.33	60	1	0	1	60	641798047	641797988	5e-21	106
TP38604	5U	45.3	chr5D	98.44	64	1	0	1	64	508994661	508994598	3e-23	113
TP42398	5U	45.3	chr5A	97.44	39	1	0	1	39	639208206	639208244	2e-09	67.6
TP42471	5U	45.3	chr5D	96.88	64	2	0	1	64	511518577	511518514	1e-21	108
TP5098	5U	45.3	chr5D	97.44	39	1	0	1	39	510059429	510059467	2e-09	67.6
TP6453	5U	45.3	chr5D	95.45	44	2	0	1	44	510655794	510655751	2e-10	71.3
TP6786	5U	45.3	chr5A	96.49	57	2	0	3	59	641428278	641428222	1e-17	95.3
TP12529	5U	45.38	chr5A	89.86	69	2	2	1	64	620863537	620863469	2e-14	84.2
TP35836	5U	45.38	chr5D	98.44	64	1	0	1	64	496917076	496917013	3e-23	113
TP43000	5U	45.63	chr5B	100	42	0	0	1	42	640289734	640289775	1e-12	78.7
TP17442	5U	45.66	chr5D	93.75	64	3	1	1	64	419034607	419034545	1e-17	95.3
TP29516	5U	45.66	chr5A	93.75	64	4	0	1	64	626076163	626076226	3e-18	97.1
TP31531	5U	45.66	chr5B	100	55	0	0	10	64	613179898	613179952	6e-20	102
TP37144	5U	45.66	chr5B	100	58	0	0	7	64	617809260	617809317	1e-21	108
TP9648	5U	45.71	chr5A	96.77	62	2	0	3	64	623490941	623490880	2e-20	104
TP7169	5U	46.37	chr5D	98.44	64	1	0	1	64	481426460	481426397	3e-23	113
TP14331	5U	46.38	chr5B	96.88	64	2	0	1	64	620011919	620011856	1e-21	108
TP24020	5U	46.38	chr5B	100	64	0	0	1	64	633158430	633158367	6e-25	119
TP28578	5U	46.38	chr5B	92.19	64	5	0	1	64	617809263	617809200	1e-16	91.6
TP31935	5U	46.38	chr5A	96.92	65	1	1	1	64	619694737	619694673	1e-21	108
TP39480	5U	46.38	chr5A	96.88	64	2	0	1	64	624119772	624119709	1e-21	108
TP43798	5U	46.38	chr5D	96.72	61	2	0	1	61	501063572	501063512	6e-20	102
TP4444	5U	46.38	chr5B	96.88	64	2	0	1	64	617832575	617832638	1e-21	108
TP39700	5U	46.46	chr5B	98	50	1	0	9	58	601860340	601860389	2e-15	87.9
TP41256	5U	46.46	chr5B	100	64	0	0	1	64	601406636	601406573	6e-25	119
TP29076	5U	47	chr5A	98.44	64	1	0	1	64	33879550	33879613	3e-23	113
TP29574	5U	47.45	chr5D	100	59	0	0	1	59	479581289	479581347	4e-22	110
TP11086	5U	48.07	chr5A	100	64	0	0	1	64	35631025	35631088	6e-25	119
TP12556	5U	48.07	chr5B	95.31	64	3	0	1	64	41226425	41226362	6e-20	102
TP24821	5U	48.07	chr5D	100	64	0	0	1	64	45666349	45666286	6e-25	119
TP26579	5U	48.07	chr5D	100	64	0	0	1	64	44705887	44705824	6e-25	119
TP20410	5U	48.61	chr5B	97.5	40	1	0	1	40	598752271	598752232	7e-10	69.4
TP3141	5U	48.61	chr5D	100	28	0	0	1	28	490997660	490997633	7e-05	52.8
TP31824	5U	48.61	chr5B	100	52	0	0	1	52	605822430	605822481	3e-18	97.1
TP38678	5U	48.61	chr5D	96.88	64	2	0	1	64	489825896	489825959	1e-21	108
TP40508	5U	48.61	chr5B	97.67	43	1	0	1	43	605513534	605513576	1e-11	75
TP41488	5U	48.61	chr5D	98.44	64	1	0	1	64	490515716	490515779	3e-23	113
TP28187	5U	49.15	chr5A	98.28	58	1	0	1	58	38055361	38055304	6e-20	102
TP16796	5U	49.48	chr5D	100	38	0	0	1	38	48314609	48314646	2e-10	71.3
TP1070	5U	49.67	chr5B	95.83	48	2	0	4	51	564477835	564477882	1e-12	78.7
TP11642	5U	50.05	chr5D	98.44	64	1	0	1	64	482925108	482925045	3e-23	113
TP14159	5U	50.05	chr5D	100	64	0	0	1	64	467855143	467855080	6e-25	119
TP16126	5U	50.05	chr5D	96.88	64	2	0	1	64	486735565	486735502	1e-21	108
TP18426	5U	50.05	chr5B	97.5	40	1	0	16	55	597817149	597817110	7e-10	69.4
TP18733	5U	50.05	chr5D	100	62	0	0	1	62	488199373	488199434	8e-24	115
TP19368	5U	50.05	chr5D	100	64	0	0	1	64	474139420	474139357	6e-25	119
TP20626	5U	50.05	chr5A	96.88	64	2	0	1	64	644346039	644345976	1e-21	108
TP26375	5U	50.05	chr5B	98	50	1	0	1	50	598146738	598146787	2e-15	87.9
TP26389	5U	50.05	chr5D	96.88	64	2	0	1	64	486813576	486813639	1e-21	108
TP26822	5U	50.05	chr5B	96.92	65	1	1	1	64	596458492	596458556	1e-21	108
TP26954	5U	50.05	chr5A	98.44	64	1	0	1	64	606684280	606684217	3e-23	113
TP30489	5U	50.05	chr5D	100	61	0	0	1	61	486749559	486749499	3e-23	113
TP33064	5U	50.05	chr5B	91.23	57	3	1	1	57	588812659	588812713	4e-12	76.8
TP34381	5U	50.05	chr5A	98.44	64	1	0	1	64	610491492	610491429	3e-23	113
TP35983	5U	50.05	chr5D	100	55	0	0	1	55	473381915	473381861	6e-20	102
TP36481	5U	50.05	chr5D	100	58	0	0	1	58	534573188	534573245	1e-21	108
TP36988	5U	50.05	chr5B	93.75	64	4	0	1	64	577524271	577524334	3e-18	97.1
TP37958	5U	50.05	chr5A	97.96	49	1	0	1	49	608346019	608346067	6e-15	86.1
TP39173	5U	50.05	chr5D	100	64	0	0	1	64	487287624	487287561	6e-25	119
TP39800	5U	50.05	chr5A	100	64	0	0	1	64	591133578	591133515	6e-25	119
TP43184	5U	50.05	chr5B	96.77	62	2	0	1	62	578592224	578592163	2e-20	104
TP4367	5U	50.05	chr5A	100	58	0	0	1	58	609194990	609194933	1e-21	108
TP43771	5U	50.05	chr5B	100	38	0	0	16	53	580742824	580742861	2e-10	71.3
TP43999	5U	50.05	chr5D	100	64	0	0	1	64	487420393	487420330	6e-25	119
TP46115	5U	50.05	chr5B	98.39	62	1	0	1	62	518079975	518080036	4e-22	110
TP46150	5U	50.05	chr5D	96.72	61	2	0	4	64	475578925	475578985	6e-20	102
TP5364	5U	50.05	chr5A	96.36	55	2	0	1	55	591435841	591435895	1e-16	91.6
TP6711	5U	50.05	chr5A	100	64	0	0	1	64	590695364	590695427	6e-25	119
TP7236	5U	50.05	chr5A	100	64	0	0	1	64	595394489	595394552	6e-25	119
TP792	5U	50.05	chr5D	96.83	63	2	0	2	64	482289391	482289329	5e-21	106
TP5423	5U	50.26	chr5D	98.44	64	1	0	1	64	448838822	448838885	3e-23	113
TP26674	5U	50.41	chr5B	98.44	64	1	0	1	64	562453142	562453079	3e-23	113
TP34843	5U	50.77	chr5A	100	64	0	0	1	64	590669056	590669119	6e-25	119
TP11125	5U	50.81	chr5B	93.55	62	1	3	1	59	571473650	571473589	5e-16	89.8
TP35035	5U	50.81	chr5B	98.41	63	1	0	2	64	571235455	571235517	1e-22	111
TP35869	5U	51.33	chr5B	100	53	0	0	1	53	546781185	546781237	8e-19	99
TP19930	5U	51.48	chr5D	98.44	64	1	0	1	64	464226546	464226483	3e-23	113
TP27861	5U	51.48	chr5D	100	64	0	0	1	64	464991176	464991239	6e-25	119
TP28348	5U	51.48	chr5B	98.44	64	1	0	1	64	571321830	571321893	3e-23	113
TP41063	5U	51.48	chr5A	92.19	64	2	1	1	64	585067739	585067679	2e-15	87.9
TP4997	5U	51.48	chr5A	98.44	64	1	0	1	64	588875900	588875963	3e-23	113
TP31209	5U	52.2	chr5B	85.92	71	3	6	1	64	571188059	571187989	7e-10	69.4
TP29129	5U	52.3	chr5D	100	64	0	0	1	64	76204232	76204169	6e-25	119
TP45967	5U	52.85	chr5B	98.44	64	1	0	1	64	687763271	687763208	3e-23	113
TP11823	5U	52.97	chr5D	100	56	0	0	1	56	326126662	326126607	2e-20	104
TP13819	5U	52.97	chr5A	100	64	0	0	1	64	50739939	50739876	6e-25	119
TP2474	5U	52.97	chr5A	100	64	0	0	1	64	388639847	388639784	6e-25	119
TP2915	5U	52.97	chr5B	100	50	0	0	1	50	332364579	332364530	4e-17	93.5
TP29779	5U	52.97	chr5D	98.44	64	1	0	1	64	276263934	276263871	3e-23	113
TP31431	5U	52.97	chr5A	98.44	64	1	0	1	64	367134460	367134397	3e-23	113
TP31687	5U	52.97	chr5B	98.08	52	1	0	1	52	356215501	356215552	1e-16	91.6
TP36089	5U	52.97	chr5D	100	64	0	0	1	64	302975180	302975117	6e-25	119
TP371	5U	52.97	chr5B	100	64	0	0	1	64	311491460	311491523	6e-25	119
TP6690	5U	52.97	chr5D	100	64	0	0	1	64	269738892	269738955	6e-25	119
TP10996	5U	53.31	chr5B	100	64	0	0	1	64	311778652	311778589	6e-25	119
TP20856	5U	53.64	chr5D	98.41	63	1	0	1	63	461440945	461440883	1e-22	111
TP5142	5U	53.87	chr5D	100	64	0	0	1	64	283352420	283352483	6e-25	119
TP14978	5U	53.98	chr5B	98.44	64	1	0	1	64	337157894	337157831	3e-23	113
TP39806	5U	53.98	chr5B	100	62	0	0	1	62	341522512	341522573	8e-24	115
TP7851	5U	53.98	chr5A	100	64	0	0	1	64	392708031	392707968	6e-25	119
TP22741	5U	54	chr5A	98.44	64	1	0	1	64	564496346	564496283	3e-23	113
TP13395	5U	54.32	chr5A	98.44	64	1	0	1	64	384952019	384951956	3e-23	113
TP16643	5U	54.32	chr5D	96.88	64	0	1	1	64	298125469	298125408	5e-21	106
TP1733	5U	54.32	chr5B	100	64	0	0	1	64	337904336	337904273	6e-25	119
TP18973	5U	54.32	chr5B	95.74	47	2	0	1	47	399298612	399298566	4e-12	76.8
TP37297	5U	54.32	chr5A	100	64	0	0	1	64	379107320	379107257	6e-25	119
TP38147	5U	54.32	chr5A	100	62	0	0	1	62	381763558	381763497	8e-24	115
TP39360	5U	54.32	chr5D	100	51	0	0	1	51	293368647	293368597	1e-17	95.3
TP41808	5U	54.32	chr5A	100	38	0	0	19	56	48464787	48464824	2e-10	71.3
TP43072	5U	54.32	chr5B	93.85	65	3	1	1	64	111199071	111199007	3e-18	97.1
TP45823	5U	54.32	chr5D	96.88	64	1	1	1	64	283008492	283008554	5e-21	106
TP21235	5U	54.36	chr5B	96.88	64	2	0	1	64	558617437	558617374	1e-21	108
TP26482	5U	54.36	chr5A	98.39	62	1	0	1	62	687479663	687479602	4e-22	110
TP30634	5U	54.36	chr5A	96.55	58	2	0	1	58	571467677	571467734	3e-18	97.1
TP32107	5U	54.36	chr5D	93.75	64	4	0	1	64	116661727	116661790	3e-18	97.1
TP32654	5U	54.36	chr5B	98.44	64	1	0	1	64	561062385	561062322	3e-23	113
TP39726	5U	54.36	chr5D	98.44	64	1	0	1	64	458700329	458700392	3e-23	113
TP44176	5U	54.36	chr5D	98.44	64	1	0	1	64	459065578	459065641	3e-23	113
TP44508	5U	54.36	chr5A	100	64	0	0	1	64	564549913	564549976	6e-25	119
TP45977	5U	54.36	chr5D	100	64	0	0	1	64	444303146	444303209	6e-25	119
TP5599	5U	54.36	chr5A	92.19	64	5	0	1	64	564556557	564556494	1e-16	91.6
TP45004	5U	54.65	chr5A	98.41	63	1	0	2	64	436191703	436191765	1e-22	111
TP18664	5U	54.72	chr5D	100	64	0	0	1	64	446401412	446401475	6e-25	119
TP34404	5U	54.72	chr5D	98.44	64	1	0	1	64	445697257	445697320	3e-23	113
TP30931	5U	54.99	chr5D	95.31	64	3	0	1	64	345085846	345085909	6e-20	102
TP4730	5U	54.99	chr5D	96.88	64	2	0	1	64	61783424	61783487	1e-21	108
TP6607	5U	55.04	chr5D	98.44	64	1	0	1	64	444300293	444300230	3e-23	113
TP6653	5U	55.04	chr5D	95.31	64	3	0	1	64	443888856	443888919	6e-20	102
TP8639	5U	55.51	chr5B	94.83	58	3	0	1	58	662807819	662807876	1e-16	91.6
TP28133	5U	55.9	chr5B	98.44	64	1	0	1	64	540268474	540268537	3e-23	113
TP29005	5U	55.9	chr5A	96.55	58	0	2	1	56	564498279	564498336	1e-17	95.3
TP7898	5U	55.94	chr5A	92.19	64	5	0	1	64	547348661	547348598	1e-16	91.6
TP13572	5U	56.61	chr5D	97.83	46	1	0	1	46	433015311	433015266	3e-13	80.5
TP14317	5U	56.62	chr5D	96.77	62	2	0	1	62	441886736	441886797	2e-20	104
TP20077	5U	56.62	chr5B	100	44	0	0	3	46	536508812	536508769	8e-14	82.4
TP37658	5U	56.62	chr5D	96.88	64	2	0	1	64	441571964	441572027	1e-21	108
TP25385	5U	57.34	chr5D	100	64	0	0	1	64	435104825	435104762	6e-25	119
TP30153	5U	57.56	chr5D	100	64	0	0	1	64	437978885	437978822	6e-25	119
TP7064	5U	57.99	chr5A	100	39	0	0	4	42	556240274	556240236	5e-11	73.1
TP35086	5U	58.01	chr5A	98.18	55	1	0	1	55	469272225	469272171	3e-18	97.1
TP11729	5U	58.35	chr5A	100	64	0	0	1	64	558549050	558548987	6e-25	119
TP12049	5U	58.35	chr5A	93.75	64	4	0	1	64	552585457	552585520	3e-18	97.1
TP12321	5U	58.35	chr5B	100	64	0	0	1	64	535214575	535214638	6e-25	119
TP1380	5U	58.35	chr5B	100	64	0	0	1	64	527497794	527497857	6e-25	119
TP18128	5U	58.35	chr5A	98.44	64	1	0	1	64	561972828	561972765	3e-23	113
TP1867	5U	58.35	chr5D	92.86	56	4	0	1	56	440940840	440940895	8e-14	82.4
TP20070	5U	58.35	chr5A	98.44	64	1	0	1	64	552559546	552559483	3e-23	113
TP20783	5U	58.35	chr5D	100	40	0	0	1	40	443488267	443488228	1e-11	75
TP23352	5U	58.35	chr5D	100	62	0	0	1	62	436621364	436621425	8e-24	115
TP2439	5U	58.35	chr5B	96.88	64	2	0	1	64	538706367	538706304	1e-21	108
TP26588	5U	58.35	chr5D	97.44	39	1	0	3	41	438430016	438429978	2e-09	67.6
TP28109	5U	58.35	chr5D	98.44	64	1	0	1	64	441021623	441021686	3e-23	113
TP30863	5U	58.35	chr5B	96.88	64	2	0	1	64	534013170	534013107	1e-21	108
TP32940	5U	58.35	chr5B	95.38	65	2	1	1	64	320383556	320383620	6e-20	102
TP32943	5U	58.35	chr5D	98.44	64	1	0	1	64	257127187	257127250	3e-23	113
TP33974	5U	58.35	chr5A	98.39	62	1	0	3	64	558943100	558943161	4e-22	110
TP39586	5U	58.35	chr5B	94.55	55	3	0	5	59	529045598	529045652	6e-15	86.1
TP43138	5U	58.35	chr5B	95.31	64	3	0	1	64	534036466	534036403	6e-20	102
TP5677	5U	58.35	chr5A	96.49	57	2	0	1	57	561532825	561532881	1e-17	95.3
TP39072	5U	59.57	chr5D	94.64	56	3	0	9	64	438576696	438576751	2e-15	87.9
TP11799	5U	60.36	chr5D	100	45	0	0	1	45	370955699	370955655	2e-14	84.2
TP22529	5U	60.36	chr5A	97.87	47	1	0	1	47	475514774	475514728	8e-14	82.4
TP29549	5U	60.36	chr5B	98.44	64	1	0	1	64	440011190	440011127	3e-23	113
TP24412	5U	61.21	chr5D	90.62	64	6	0	1	64	421991875	421991812	6e-15	86.1
TP43119	5U	61.21	chr5B	100	64	0	0	1	64	507873628	507873565	6e-25	119
TP39893	5U	61.81	chr5D	100	64	0	0	1	64	429053750	429053687	6e-25	119
TP11653	5U	62.96	chr5D	92.31	65	4	1	1	64	424316058	424315994	1e-16	91.6
TP22790	5U	62.96	chr5A	96.77	62	2	0	1	62	538861175	538861236	2e-20	104
TP28852	5U	62.96	chr5B	98.44	64	1	0	1	64	516093117	516093054	3e-23	113
TP41309	5U	62.96	chr5D	98.44	64	1	0	1	64	425841446	425841509	3e-23	113
TP45654	5U	62.96	chr5A	100	64	0	0	1	64	544246916	544246853	6e-25	119
TP29439	5U	64.61	chr5D	96.88	64	2	0	1	64	421370601	421370538	1e-21	108
TP39083	5U	64.97	chr5D	93.75	64	1	1	1	64	421654649	421654709	4e-17	93.5
TP5361	5U	64.97	chr5B	96.49	57	2	0	8	64	507716163	507716107	1e-17	95.3
TP12158	5U	65	chr5D	100	60	0	0	1	60	388109844	388109785	1e-22	111
TP12743	5U	65	chr5A	100	60	0	0	1	60	494575291	494575350	1e-22	111
TP13147	5U	65	chr5B	100	64	0	0	1	64	455735160	455735223	6e-25	119
TP15427	5U	65	chr5D	100	64	0	0	1	64	379794483	379794546	6e-25	119
TP20095	5U	65	chr5D	100	54	0	0	1	54	396690162	396690109	2e-19	100
TP23945	5U	65	chr5B	100	48	0	0	1	48	469980929	469980976	5e-16	89.8
TP36688	5U	65	chr5B	96.88	64	2	0	1	64	455747918	455747981	1e-21	108
TP37418	5U	65	chr5A	100	64	0	0	1	64	477397435	477397498	6e-25	119
TP40258	5U	65	chr5B	100	31	0	0	19	49	450556240	450556270	1e-06	58.4
TP43564	5U	65	chr5D	96.3	54	2	0	10	63	377170696	377170643	5e-16	89.8
TP45240	5U	65	chr5D	85.25	61	1	5	1	53	395935203	395935263	5e-06	56.5
TP6395	5U	65	chr5B	92.54	67	1	1	2	64	445173931	445173865	4e-17	93.5
TP9933	5U	65	chr5B	88.89	63	4	1	5	64	477880959	477880897	1e-11	75
TP6435	5U	65.69	chr5B	100	51	0	0	4	54	502377739	502377789	1e-17	95.3
TP27583	5U	66.05	chr5D	98.31	59	1	0	6	64	420205363	420205421	2e-20	104
TP28360	5U	66.05	chr5A	100	64	0	0	1	64	525705758	525705695	6e-25	119
TP28809	5U	66.05	chr5D	100	64	0	0	1	64	415747285	415747348	6e-25	119
TP28827	5U	66.05	chr5A	100	38	0	0	1	38	528891865	528891902	2e-10	71.3
TP29404	5U	66.05	chr5A	98.44	64	1	0	1	64	528910519	528910456	3e-23	113
TP3099	5U	66.05	chr5D	98.15	54	1	0	1	54	415749337	415749284	1e-17	95.3
TP3708	5U	66.05	chr5B	98.44	64	1	0	1	64	496523628	496523565	3e-23	113
TP38111	5U	66.05	chr5D	100	64	0	0	1	64	412147524	412147587	6e-25	119
TP38578	5U	66.05	chr5B	95.31	64	3	0	1	64	504778746	504778809	6e-20	102
TP41610	5U	66.05	chr5D	100	58	0	0	1	58	416597413	416597356	1e-21	108
TP9262	5U	66.05	chr5A	100	64	0	0	1	64	533847421	533847358	6e-25	119
TP11636	5U	66.08	chr5B	100	64	0	0	1	64	460943328	460943391	6e-25	119
TP12614	5U	66.08	chr5B	98.44	64	1	0	1	64	473519859	473519922	3e-23	113
TP14946	5U	66.08	chr5A	92.54	67	0	3	1	62	476837500	476837434	1e-16	91.6
TP19682	5U	66.08	chr5A	100	37	0	0	1	37	490317468	490317504	7e-10	69.4
TP2076	5U	66.08	chr5A	98.44	64	1	0	1	64	470186592	470186529	3e-23	113
TP22707	5U	66.08	chr5A	100	64	0	0	1	64	502296934	502296871	6e-25	119
TP27724	5U	66.08	chr5D	96.88	64	2	0	1	64	384141608	384141671	1e-21	108
TP29029	5U	66.08	chr5D	98.44	64	1	0	1	64	378898382	378898319	3e-23	113
TP3716	5U	66.08	chr5D	98.41	63	1	0	2	64	382997830	382997768	1e-22	111
TP38240	5U	66.08	chr5A	100	47	0	0	1	47	494575294	494575248	2e-15	87.9
TP38373	5U	66.08	chr5A	93.75	64	4	0	1	64	502229058	502229121	3e-18	97.1
TP44266	5U	66.08	chr5A	96.88	64	2	0	1	64	491162435	491162372	1e-21	108
TP456	5U	66.08	chr5D	100	42	0	0	23	64	396417217	396417258	1e-12	78.7
TP4652	5U	66.08	chr5B	98.44	64	1	0	1	64	454637234	454637297	3e-23	113
TP6265	5U	66.08	chr5A	95.31	64	3	0	1	64	491162202	491162139	6e-20	102
TP8811	5U	66.08	chr5B	92.19	64	2	1	1	64	463230351	463230291	2e-15	87.9
TP6302	5U	66.12	chr5B	96.88	64	2	0	1	64	479204580	479204643	1e-21	108
TP45064	5U	66.44	chr5D	93.65	63	4	0	2	64	402737320	402737382	1e-17	95.3
TP12666	5U	66.46	chr5B	95.31	64	3	0	1	64	497217929	497217992	6e-20	102
TP35298	5U	66.46	chr5A	98.44	64	1	0	1	64	513283125	513283188	3e-23	113
TP28616	5U	66.79	chr5D	100	49	0	0	1	49	410249998	410249950	1e-16	91.6
TP12291	5U	66.8	chr5D	100	64	0	0	1	64	406973092	406973029	6e-25	119
TP15011	5U	66.8	chr5D	98.18	55	1	0	1	55	406606349	406606295	3e-18	97.1
TP15150	5U	66.8	chr5A	100	61	0	0	4	64	511877147	511877207	3e-23	113
TP24708	5U	66.8	chr5A	90.38	52	4	1	3	53	509993525	509993474	2e-09	67.6
TP25479	5U	66.8	chr5A	100	64	0	0	1	64	508620019	508620082	6e-25	119
TP25962	5U	66.8	chr5D	100	64	0	0	1	64	410617661	410617724	6e-25	119
TP27428	5U	66.8	chr5B	100	64	0	0	1	64	486896216	486896153	6e-25	119
TP34666	5U	66.8	chr5D	100	64	0	0	1	64	410303210	410303147	6e-25	119
TP36164	5U	66.8	chr5B	96.88	64	2	0	1	64	486082208	486082271	1e-21	108
TP3884	5U	66.8	chr5B	100	45	0	0	1	45	491609510	491609554	2e-14	84.2
TP4317	5U	66.8	chr5A	100	64	0	0	1	64	508620022	508619959	6e-25	119
TP44401	5U	66.8	chr5D	100	64	0	0	1	64	404772885	404772822	6e-25	119
TP44928	5U	66.8	chr5B	98.44	64	1	0	1	64	491895092	491895155	3e-23	113
TP5331	5U	66.8	chr5D	95.31	64	3	0	1	64	410867266	410867203	6e-20	102
TP8890	5U	66.8	chr5D	96.88	64	2	0	1	64	406594253	406594316	1e-21	108
TP975	5U	66.8	chr5A	100	64	0	0	1	64	509218700	509218637	6e-25	119
TP20233	5U	67.13	chr5D	100	64	0	0	1	64	412261381	412261444	6e-25	119
TP33190	5U	67.16	chr5B	96.88	64	2	0	1	64	495472002	495471939	1e-21	108
TP33914	5U	132.78	chr5D	96.77	62	2	0	1	62	410242035	410241974	2e-20	104
TP30499	5U	134.01	chr5B	100	64	0	0	1	64	480411475	480411412	6e-25	119
TP13457	5U	179.08	chr5A	95.31	64	1	1	1	64	697848798	697848737	2e-19	100
TP1869	5U	179.42	chr5A	100	63	0	0	2	64	698372018	698372080	2e-24	117
TP32568	5U	180.42	chr5A	100	64	0	0	1	64	694760477	694760414	6e-25	119
TP33361	6U	43.29	chr7D	93.75	64	4	0	1	64	383039601	383039664	3e-18	97.1
TP7956	6U	49.15	chr6A	95.83	48	1	1	1	47	15502381	15502428	4e-12	76.8
TP23841	6U	52.1	chr6D	97.83	46	0	1	1	45	162275311	162275266	1e-12	78.7
TP9644	6U	53.54	chr6A	97.67	43	1	0	22	64	116945381	116945423	1e-11	75
TP13415	6U	64.23	chr7D	98.44	64	1	0	1	64	78621102	78621039	3e-23	113
TP21520	6U	64.95	chr7D	95.16	62	3	0	1	62	520909187	520909248	8e-19	99
TP39252	6U	66.97	chr6B	98.44	64	1	0	1	64	690027756	690027819	3e-23	113
TP2544	6U	67.64	chr6D	92.31	65	4	1	1	64	105956223	105956287	1e-16	91.6
TP11967	6U	68.96	chr6D	100	64	0	0	1	64	208261656	208261593	6e-25	119
TP26581	6U	68.96	chr6D	96.83	63	2	0	1	63	318146944	318147006	5e-21	106
TP4207	6U	68.96	chr6A	98.25	57	1	0	1	57	423535562	423535506	2e-19	100
TP991	6U	68.96	chr6B	96.88	64	2	0	1	64	479393321	479393384	1e-21	108
TP24820	6U	69.27	chr6B	100	64	0	0	1	64	452527690	452527627	6e-25	119
TP5691	6U	69.27	chr6D	100	64	0	0	1	64	256318185	256318122	6e-25	119
TP31938	6U	69.47	chr6D	98.44	64	1	0	1	64	348276628	348276565	3e-23	113
TP32013	6U	69.47	chr6D	98.44	64	1	0	1	64	301122522	301122459	3e-23	113
TP14328	6U	69.52	chr7D	100	33	0	0	7	39	10961791	10961823	1e-07	62.1
TP27767	6U	69.52	chr6B	100	64	0	0	1	64	169323967	169323904	6e-25	119
TP32495	6U	69.52	chr6D	100	61	0	0	1	61	309343483	309343423	3e-23	113
TP35324	6U	69.52	chr6D	89.06	64	1	1	1	64	97930155	97930212	1e-11	75
TP42126	6U	69.52	chr6D	95.38	65	2	1	1	64	159477109	159477173	6e-20	102
TP9257	6U	69.52	chr6D	95.24	63	3	0	2	64	243412270	243412208	2e-19	100
TP11103	6U	69.58	chr6A	100	51	0	0	1	51	493343518	493343568	1e-17	95.3
TP17046	6U	69.58	chr6D	100	64	0	0	1	64	372821001	372820938	6e-25	119
TP18577	6U	69.58	chr6A	95.31	64	3	0	1	64	489233001	489232938	6e-20	102
TP1949	6U	69.58	chr6B	98.18	55	1	0	1	55	520084918	520084864	3e-18	97.1
TP22118	6U	69.58	chr6A	100	50	0	0	1	50	456761160	456761111	4e-17	93.5
TP23491	6U	69.58	chr6D	95.31	64	0	1	1	64	348503773	348503833	8e-19	99
TP24696	6U	69.58	chr6B	98.44	64	1	0	1	64	549098829	549098892	3e-23	113
TP26422	6U	69.58	chr6B	98.28	58	1	0	1	58	526035470	526035413	6e-20	102
TP26590	6U	69.58	chr6B	96.88	64	2	0	1	64	520845096	520845033	1e-21	108
TP3108	6U	69.58	chr6A	95.24	63	2	1	1	62	489229767	489229705	8e-19	99
TP32918	6U	69.58	chr6A	90	60	6	0	5	64	104906778	104906719	1e-12	78.7
TP33160	6U	69.58	chr6B	97.73	44	1	0	1	44	564060854	564060897	4e-12	76.8
TP33503	6U	69.58	chr6D	98.44	64	1	0	1	64	373427421	373427484	3e-23	113
TP35522	6U	69.58	chr6D	100	63	0	0	2	64	353097661	353097723	2e-24	117
TP3558	6U	69.58	chr6A	91.04	67	3	1	1	64	468257462	468257528	2e-15	87.9
TP37228	6U	69.58	chr6B	100	46	0	0	1	46	530849011	530848966	6e-15	86.1
TP37416	6U	69.58	chr6A	100	64	0	0	1	64	117004564	117004501	6e-25	119
TP38633	6U	69.58	chr6A	96.36	55	2	0	1	55	531777913	531777967	1e-16	91.6
TP41177	6U	69.58	chr6A	98.44	64	1	0	1	64	134192519	134192582	3e-23	113
TP41340	6U	69.58	chr6D	98.11	53	1	0	1	53	349392823	349392875	4e-17	93.5
TP43895	6U	69.58	chr6D	95.38	65	2	1	1	64	353094923	353094859	6e-20	102
TP641	6U	69.58	chr6D	94.03	67	1	1	1	64	380563626	380563560	8e-19	99
TP8901	6U	69.58	chr6D	96.83	63	2	0	1	63	348031153	348031215	5e-21	106
TP10013	6U	69.63	chr6D	98.44	64	1	0	1	64	266960464	266960401	3e-23	113
TP11442	6U	69.63	chr6A	100	59	0	0	1	59	188251501	188251559	4e-22	110
TP11660	6U	69.63	chr6D	100	64	0	0	1	64	230780246	230780183	6e-25	119
TP14602	6U	69.63	chr6A	100	64	0	0	1	64	517889075	517889138	6e-25	119
TP15409	6U	69.63	chr6D	98.44	64	1	0	1	64	153174463	153174526	3e-23	113
TP1564	6U	69.63	chr6D	96.55	58	2	0	1	58	168287893	168287950	3e-18	97.1
TP18767	6U	69.63	chr6A	98.44	64	1	0	1	64	442036980	442037043	3e-23	113
TP23312	6U	69.63	chr6A	100	63	0	0	2	64	210949350	210949288	2e-24	117
TP2345	6U	69.63	chr6A	96.83	63	2	0	2	64	503770535	503770473	5e-21	106
TP2598	6U	69.63	chr6A	98.44	64	1	0	1	64	116943406	116943469	3e-23	113
TP27091	6U	69.63	chr6B	98.44	64	1	0	1	64	258231404	258231341	3e-23	113
TP2765	6U	69.63	chr6D	100	52	0	0	1	52	156760203	156760254	3e-18	97.1
TP28664	6U	69.63	chr6B	98.44	64	1	0	1	64	447889536	447889473	3e-23	113
TP29397	6U	69.63	chr6A	100	64	0	0	1	64	204743299	204743362	6e-25	119
TP29413	6U	69.63	chr6D	96.77	62	2	0	3	64	255224225	255224164	2e-20	104
TP29476	6U	69.63	chr6D	100	64	0	0	1	64	284390429	284390366	6e-25	119
TP3003	6U	69.63	chr6A	93.85	65	3	1	1	64	252848543	252848607	3e-18	97.1
TP30192	6U	69.63	chr6B	96.55	58	2	0	1	58	163973340	163973283	3e-18	97.1
TP30552	6U	69.63	chr6B	100	64	0	0	1	64	390042686	390042749	6e-25	119
TP3083	6U	69.63	chr6B	100	64	0	0	1	64	408619826	408619763	6e-25	119
TP30881	6U	69.63	chr6B	93.75	64	4	0	1	64	408486992	408487055	3e-18	97.1
TP33537	6U	69.63	chr6A	100	64	0	0	1	64	145133997	145134060	6e-25	119
TP34670	6U	69.63	chr6D	98.44	64	1	0	1	64	118633299	118633236	3e-23	113
TP37027	6U	69.63	chr6D	100	64	0	0	1	64	288558529	288558592	6e-25	119
TP38777	6U	69.63	chr6D	100	64	0	0	1	64	174398628	174398565	6e-25	119
TP42322	6U	69.63	chr6A	98.08	52	1	0	1	52	382518015	382517964	1e-16	91.6
TP44402	6U	69.63	chr6D	95.38	65	2	1	1	64	178679659	178679595	6e-20	102
TP45469	6U	69.63	chr6A	97.5	40	1	0	1	40	143147300	143147339	7e-10	69.4
TP4867	6U	69.63	chr6B	100	64	0	0	1	64	465680523	465680460	6e-25	119
TP5791	6U	69.63	chr6A	98.08	52	1	0	2	53	442393072	442393123	1e-16	91.6
TP6695	6U	69.63	chr7D	96.88	64	2	0	1	64	277225779	277225842	1e-21	108
TP6917	6U	69.63	chr6B	98.44	64	1	0	1	64	314562987	314562924	3e-23	113
TP7529	6U	69.63	chr6D	97.78	45	1	0	1	45	144470681	144470725	1e-12	78.7
TP803	6U	69.63	chr6D	98.31	59	1	0	1	59	153185985	153186043	2e-20	104
TP8299	6U	69.63	chr6D	96.92	65	1	1	1	64	186767200	186767264	1e-21	108
TP9718	6U	69.63	chr6D	86.57	67	2	3	1	64	112817064	112817002	2e-09	67.6
TP10080	6U	69.8	chr6A	96.97	33	1	0	1	33	479620057	479620025	5e-06	56.5
TP10588	6U	69.8	chr6A	100	64	0	0	1	64	480806535	480806472	6e-25	119
TP10856	6U	69.8	chr6D	100	58	0	0	1	58	267729255	267729198	1e-21	108
TP11917	6U	69.8	chr6B	100	64	0	0	1	64	599447162	599447225	6e-25	119
TP13259	6U	69.8	chr6B	100	64	0	0	1	64	534086382	534086445	6e-25	119
TP13653	6U	69.8	chr6A	100	64	0	0	1	64	544207906	544207969	6e-25	119
TP14538	6U	69.8	chr6D	96.88	64	2	0	1	64	304768753	304768816	1e-21	108
TP14861	6U	69.8	chr6D	100	61	0	0	1	61	308925116	308925176	3e-23	113
TP16751	6U	69.8	chr6B	93.75	64	1	1	1	64	181404908	181404968	4e-17	93.5
TP17159	6U	69.8	chr6B	100	64	0	0	1	64	569883646	569883583	6e-25	119
TP17476	6U	69.8	chr7D	97.62	42	1	0	1	42	197243775	197243816	5e-11	73.1
TP18176	6U	69.8	chr6D	92.86	42	1	1	25	64	110887033	110886992	4e-07	60.2
TP2183	6U	69.8	chr6D	96.77	62	1	1	3	64	211362420	211362360	6e-20	102
TP23224	6U	69.8	chr6B	95.45	66	1	1	1	64	441040893	441040828	2e-20	104
TP23228	6U	69.8	chr6A	100	37	0	0	28	64	119630723	119630687	7e-10	69.4
TP23281	6U	69.8	chr6D	100	64	0	0	1	64	108223516	108223579	6e-25	119
TP23435	6U	69.8	chr6A	96.88	64	2	0	1	64	186506033	186505970	1e-21	108
TP23819	6U	69.8	chr6B	98.44	64	1	0	1	64	193893544	193893607	3e-23	113
TP24041	6U	69.8	chr6D	100	63	0	0	2	64	162125736	162125798	2e-24	117
TP2518	6U	69.8	chr6B	100	64	0	0	1	64	337219113	337219176	6e-25	119
TP25939	6U	69.8	chr6B	93.75	64	4	0	1	64	465671737	465671674	3e-18	97.1
TP26269	6U	69.8	chr6B	98.44	64	1	0	1	64	554161984	554161921	3e-23	113
TP28188	6U	69.8	chr6D	98.44	64	1	0	1	64	175716984	175717047	3e-23	113
TP2850	6U	69.8	chr6B	96.88	64	2	0	1	64	474747469	474747406	1e-21	108
TP29304	6U	69.8	chr6D	98.36	61	1	0	1	61	309041701	309041761	1e-21	108
TP29373	6U	69.8	chr6B	96.88	64	2	0	1	64	559460356	559460293	1e-21	108
TP30503	6U	69.8	chr6D	98.44	64	1	0	1	64	382621905	382621842	3e-23	113
TP3333	6U	69.8	chr6D	96.88	64	2	0	1	64	148056836	148056773	1e-21	108
TP35941	6U	69.8	chr6B	98.39	62	1	0	3	64	260537827	260537766	4e-22	110
TP3603	6U	69.8	chr6A	96.23	53	2	0	1	53	358144607	358144659	2e-15	87.9
TP36325	6U	69.8	chr6A	95.31	64	3	0	1	64	421226807	421226744	6e-20	102
TP39157	6U	69.8	chr6B	100	64	0	0	1	64	164359660	164359597	6e-25	119
TP39693	6U	69.8	chr6D	95.31	64	3	0	1	64	444671389	444671452	6e-20	102
TP39931	6U	69.8	chr6D	98.44	64	1	0	1	64	163131586	163131649	3e-23	113
TP41260	6U	69.8	chr6A	98.44	64	1	0	1	64	448356362	448356299	3e-23	113
TP41830	6U	69.8	chr6B	100	64	0	0	1	64	465680520	465680583	6e-25	119
TP42685	6U	69.8	chr6D	100	64	0	0	1	64	267237946	267238009	6e-25	119
TP43850	6U	69.8	chr6D	96.88	64	2	0	1	64	306301776	306301713	1e-21	108
TP44219	6U	69.8	chr6A	100	64	0	0	1	64	484279150	484279213	6e-25	119
TP44793	6U	69.8	chr6D	100	64	0	0	1	64	318807453	318807516	6e-25	119
TP45344	6U	69.8	chr6B	96.83	63	1	1	1	62	441044806	441044744	2e-20	104
TP4563	6U	69.8	chr6B	98.44	64	1	0	1	64	561819155	561819218	3e-23	113
TP4795	6U	69.8	chr6B	95.31	64	2	1	1	63	555291312	555291375	2e-19	100
TP5821	6U	69.8	chr6D	100	64	0	0	1	64	186543026	186542963	6e-25	119
TP7601	6U	69.8	chr6A	93.75	64	4	0	1	64	184740707	184740770	3e-18	97.1
TP7983	6U	69.8	chr6D	100	64	0	0	1	64	175725772	175725835	6e-25	119
TP38528	6U	69.81	chr6B	96.88	64	2	0	1	64	455426541	455426478	1e-21	108
TP44767	6U	69.81	chr6D	93.75	64	4	0	1	64	120670282	120670345	3e-18	97.1
TP1106	6U	69.83	chr7A	98.15	54	0	1	1	53	27591073	27591020	4e-17	93.5
TP1332	6U	69.83	chr6D	100	64	0	0	1	64	233867469	233867406	6e-25	119
TP24193	6U	69.83	chr6A	100	40	0	0	1	40	525269884	525269923	1e-11	75
TP37370	6U	69.83	chr6D	100	61	0	0	1	61	161721530	161721590	3e-23	113
TP40317	6U	69.83	chr6B	98.44	64	1	0	1	64	552497566	552497629	3e-23	113
TP4164	6U	69.83	chr6B	100	50	0	0	1	50	561819317	561819366	4e-17	93.5
TP42798	6U	69.83	chr6B	95.16	62	3	0	1	62	506709093	506709154	8e-19	99
TP46038	6U	69.83	chr6B	92.19	64	1	2	1	64	562541880	562541939	2e-15	87.9
TP10182	6U	69.88	chr6D	100	64	0	0	1	64	337841357	337841420	6e-25	119
TP12970	6U	69.88	chr6D	95.31	64	3	0	1	64	313025811	313025748	6e-20	102
TP1504	6U	69.88	chr6D	97.78	45	1	0	1	45	136730032	136729988	1e-12	78.7
TP1643	6U	69.88	chr6D	96.67	60	2	0	5	64	143676735	143676676	2e-19	100
TP19395	6U	69.88	chr6A	100	64	0	0	1	64	104119243	104119306	6e-25	119
TP1977	6U	69.88	chr6D	100	63	0	0	1	63	267726087	267726025	2e-24	117
TP20829	6U	69.88	chr6A	95.31	64	3	0	1	64	442038997	442038934	6e-20	102
TP21928	6U	69.88	chr6B	100	58	0	0	7	64	515184569	515184512	1e-21	108
TP23568	6U	69.88	chr6D	98.44	64	0	1	1	64	300862084	300862022	1e-22	111
TP24146	6U	69.88	chr6B	100	42	0	0	1	42	515067645	515067686	1e-12	78.7
TP24470	6U	69.88	chr6D	100	64	0	0	1	64	287019416	287019479	6e-25	119
TP24635	6U	69.88	chr6A	98.41	63	1	0	2	64	142059060	142059122	1e-22	111
TP2471	6U	69.88	chr6D	92.19	64	5	0	1	64	96650529	96650466	1e-16	91.6
TP25345	6U	69.88	chr6B	97.78	45	1	0	1	45	470823854	470823810	1e-12	78.7
TP25508	6U	69.88	chr6B	93.65	63	4	0	2	64	695075080	695075018	1e-17	95.3
TP26531	6U	69.88	chr6D	100	64	0	0	1	64	208261359	208261422	6e-25	119
TP26921	6U	69.88	chr6B	100	64	0	0	1	64	255526311	255526248	6e-25	119
TP31818	6U	69.88	chr6D	100	64	0	0	1	64	123799524	123799461	6e-25	119
TP32172	6U	69.88	chr7B	95.08	61	3	0	1	61	692888118	692888178	3e-18	97.1
TP33620	6U	69.88	chr6D	98	50	0	1	10	58	312955196	312955245	6e-15	86.1
TP34950	6U	69.88	chr6B	100	64	0	0	1	64	163966056	163966119	6e-25	119
TP36572	6U	69.88	chr6A	98.44	64	1	0	1	64	402950807	402950744	3e-23	113
TP3683	6U	69.88	chr6A	98.39	62	1	0	3	64	445570655	445570716	4e-22	110
TP38433	6U	69.88	chr6B	98.44	64	1	0	1	64	278537634	278537571	3e-23	113
TP39869	6U	69.88	chr6A	98.44	64	1	0	1	64	445764238	445764175	3e-23	113
TP40438	6U	69.88	chr6D	96.72	61	2	0	4	64	186552629	186552689	6e-20	102
TP41445	6U	69.88	chr6D	96.36	55	2	0	10	64	308901040	308901094	1e-16	91.6
TP43386	6U	69.88	chr6B	100	64	0	0	1	64	248507417	248507354	6e-25	119
TP44440	6U	69.88	chr6D	96.88	64	2	0	1	64	131678888	131678825	1e-21	108
TP4502	6U	69.88	chr6D	100	60	0	0	1	60	341645113	341645172	1e-22	111
TP4797	6U	69.88	chr6A	95.31	64	3	0	1	64	442396177	442396114	6e-20	102
TP5001	6U	69.88	chr6D	95.31	64	3	0	1	64	172131077	172131140	6e-20	102
TP5154	6U	69.88	chr6D	91.04	67	3	1	1	64	296825323	296825389	2e-15	87.9
TP5356	6U	69.88	chr7A	98.18	55	1	0	1	55	17192270	17192216	3e-18	97.1
TP5559	6U	69.88	chr6A	100	64	0	0	1	64	143699272	143699335	6e-25	119
TP5635	6U	69.88	chr6D	96.88	64	2	0	1	64	136419299	136419236	1e-21	108
TP8317	6U	69.88	chr6D	100	39	0	0	1	39	121347022	121346984	5e-11	73.1
TP9619	6U	69.88	chr7B	96.83	63	2	0	2	64	176212108	176212170	5e-21	106
TP9650	6U	69.88	chr6D	96.88	64	1	1	1	64	289026997	289026935	5e-21	106
TP14252	6U	69.97	chr6A	96.88	64	2	0	1	64	212357104	212357167	1e-21	108
TP17860	6U	69.97	chr6A	100	57	0	0	1	57	524362431	524362375	5e-21	106
TP20263	6U	69.97	chr6A	96.88	64	2	0	1	64	508849881	508849944	1e-21	108
TP28372	6U	69.97	chr6D	96.49	57	2	0	1	57	112917949	112917893	1e-17	95.3
TP38305	6U	69.97	chr6B	98.44	64	1	0	1	64	413948891	413948828	3e-23	113
TP41990	6U	69.97	chr6B	95.31	64	3	0	1	64	565705598	565705661	6e-20	102
TP9709	6U	69.97	chr6A	96.23	53	1	1	1	53	219636597	219636546	6e-15	86.1
TP9955	6U	69.97	chr6B	100	60	0	0	1	60	542228495	542228554	1e-22	111
TP13389	6U	70.16	chr6A	98.44	64	1	0	1	64	517558653	517558716	3e-23	113
TP5093	6U	70.21	chr7A	88.06	67	5	2	1	64	401971921	401971855	4e-12	76.8
TP19666	6U	70.55	chr7A	97.22	36	0	1	1	36	127522067	127522033	4e-07	60.2
TP40532	6U	70.55	chr6D	96.88	64	2	0	1	64	89002392	89002455	1e-21	108
TP41001	6U	70.55	chr6D	93.1	58	4	0	1	58	199445063	199445120	6e-15	86.1
TP42984	6U	70.55	chr6A	100	31	0	0	20	50	552763628	552763598	1e-06	58.4
TP94	6U	70.55	chr6D	100	64	0	0	1	64	396916467	396916530	6e-25	119
TP1145	6U	70.88	chr6A	100	42	0	0	1	42	551983459	551983500	1e-12	78.7
TP22769	6U	70.88	chr6A	100	64	0	0	1	64	548405150	548405087	6e-25	119
TP2578	6U	70.88	chr6B	100	41	0	0	1	41	593965045	593965005	4e-12	76.8
TP33346	6U	70.88	chr6D	100	64	0	0	1	64	405586865	405586802	6e-25	119
TP34220	6U	70.88	chr6B	100	47	0	0	1	47	594654086	594654040	2e-15	87.9
TP37954	6U	70.88	chr6A	100	44	0	0	1	44	542386099	542386056	8e-14	82.4
TP3858	6U	70.88	chr6D	100	42	0	0	1	42	399220421	399220380	1e-12	78.7
TP38787	6U	70.88	chr6A	96.83	63	2	0	2	64	540043622	540043560	5e-21	106
TP3966	6U	70.88	chr6D	97.5	40	0	1	1	39	400649416	400649377	2e-09	67.6
TP3985	6U	70.88	chr6D	95.08	61	3	0	1	61	401294020	401294080	3e-18	97.1
TP41442	6U	70.88	chr6A	98.44	64	1	0	1	64	543395532	543395595	3e-23	113
TP41548	6U	70.88	chr6A	94.64	56	3	0	2	57	551108166	551108111	2e-15	87.9
TP9281	6U	71.96	chr6B	94.74	57	3	0	1	57	609000558	609000502	5e-16	89.8
TP13535	6U	72.23	chr6A	98.39	62	1	0	1	62	556099639	556099578	4e-22	110
TP18163	6U	72.23	chr6A	94.64	56	3	0	1	56	554855776	554855831	2e-15	87.9
TP30895	6U	72.23	chr6D	98.28	58	1	0	1	58	408946212	408946269	6e-20	102
TP37777	6U	72.23	chr6A	95.31	64	3	0	1	64	554839771	554839708	6e-20	102
TP27102	6U	72.56	chr6D	100	64	0	0	1	64	405586862	405586925	6e-25	119
TP22266	6U	74.42	chr6A	100	64	0	0	1	64	553759308	553759245	6e-25	119
TP2833	6U	74.42	chr6B	96.88	64	2	0	1	64	609889984	609889921	1e-21	108
TP2917	6U	74.42	chr6A	100	46	0	0	1	46	555753708	555753753	6e-15	86.1
TP31412	6U	74.42	chr6D	98.33	60	1	0	1	60	407472129	407472188	5e-21	106
TP42998	6U	74.42	chr6D	100	47	0	0	1	47	409764845	409764799	2e-15	87.9
TP15715	6U	74.58	chr6B	100	64	0	0	1	64	638934001	638934064	6e-25	119
TP17303	6U	74.58	chr6B	95.08	61	3	0	4	64	645378474	645378534	3e-18	97.1
TP17804	6U	74.58	chr7D	100	60	0	0	5	64	406272171	406272112	1e-22	111
TP19701	6U	74.58	chr6A	98.25	57	1	0	1	57	556762622	556762566	2e-19	100
TP19752	6U	74.58	chr6D	96.55	58	2	0	1	58	411724929	411724872	3e-18	97.1
TP37233	6U	74.58	chr6D	96.61	59	2	0	1	59	418879251	418879309	8e-19	99
TP3954	6U	74.58	chr6A	98.21	56	1	0	1	56	562373781	562373726	8e-19	99
TP42414	6U	74.58	chr6B	98.44	64	1	0	1	64	631509923	631509860	3e-23	113
TP44296	6U	74.58	chr6B	98.44	64	1	0	1	64	643187052	643187115	3e-23	113
TP9328	6U	74.58	chr6B	100	51	0	0	14	64	632304567	632304517	1e-17	95.3
TP29659	6U	74.78	chr6D	96.88	64	2	0	1	64	408214492	408214555	1e-21	108
TP37035	6U	74.78	chr6D	100	42	0	0	1	42	409776132	409776173	1e-12	78.7
TP43106	6U	74.78	chr6D	92.59	54	2	1	1	52	410826943	410826890	4e-12	76.8
TP30073	6U	75.14	chr6B	100	64	0	0	1	64	615084455	615084392	6e-25	119
TP42923	6U	75.14	chr6A	94.55	55	3	0	10	64	554306959	554306905	6e-15	86.1
TP31996	6U	75.67	chr6B	92.19	64	5	0	1	64	643980130	643980067	1e-16	91.6
TP26536	6U	75.86	chr6B	100	30	0	0	8	37	619403591	619403562	5e-06	56.5
TP17470	6U	76.03	chr6D	95.31	64	3	0	1	64	428228591	428228654	6e-20	102
TP33132	6U	76.03	chr6A	96.88	64	2	0	1	64	573507159	573507222	1e-21	108
TP22051	6U	76.22	chr6A	98.33	60	1	0	1	60	562912032	562912091	5e-21	106
TP3926	6U	76.22	chr6D	90.62	64	6	0	1	64	420427221	420427158	6e-15	86.1
TP11022	6U	76.29	chr6A	100	55	0	0	1	55	574936502	574936448	6e-20	102
TP17478	6U	76.29	chr6A	96.88	64	2	0	1	64	574225164	574225227	1e-21	108
TP17974	6U	76.29	chr6D	98.39	62	1	0	1	62	429016357	429016418	4e-22	110
TP6508	6U	76.29	chr6D	100	50	0	0	1	50	423815300	423815349	4e-17	93.5
TP44559	6U	76.58	chr6D	100	64	0	0	1	64	421696822	421696759	6e-25	119
TP25952	6U	76.94	chr7A	98.18	55	1	0	10	64	189271375	189271429	3e-18	97.1
TP34481	6U	76.94	chr6A	98.25	57	1	0	1	57	569119432	569119488	2e-19	100
TP39393	6U	76.94	chr7D	100	64	0	0	1	64	54786457	54786394	6e-25	119
TP7316	6U	76.94	chr6B	92.19	64	5	0	1	64	639979861	639979798	1e-16	91.6
TP30942	6U	77.3	chr6A	96.88	64	0	1	1	64	562400561	562400622	5e-21	106
TP36225	6U	77.3	chr6D	93.75	64	4	0	1	64	428442115	428442052	3e-18	97.1
TP45516	6U	77.3	chr6B	97.83	46	1	0	1	46	642978853	642978898	3e-13	80.5
TP2488	6U	77.9	chr6A	96.88	64	2	0	1	64	574935147	574935210	1e-21	108
TP43746	6U	77.9	chr6A	93.85	65	3	1	1	64	575055681	575055745	3e-18	97.1
TP9196	6U	77.9	chr6B	98.44	64	1	0	1	64	645533308	645533371	3e-23	113
TP24487	6U	78.14	chr6D	100	64	0	0	1	64	431466017	431465954	6e-25	119
TP26861	6U	78.26	chr6D	100	64	0	0	1	64	428194345	428194408	6e-25	119
TP39892	6U	78.26	chr6A	100	64	0	0	1	64	575053241	575053304	6e-25	119
TP6647	6U	78.26	chr6D	100	64	0	0	1	64	423486763	423486826	6e-25	119
TP19943	6U	78.98	chr6D	98	50	1	0	1	50	429652430	429652479	2e-15	87.9
TP35735	6U	78.98	chr6A	97.96	49	1	0	1	49	574911556	574911508	6e-15	86.1
TP44473	6U	78.98	chr6B	98.44	64	1	0	1	64	647587935	647587998	3e-23	113
TP45745	6U	78.98	chr6D	100	64	0	0	1	64	434604888	434604825	6e-25	119
TP8361	6U	78.98	chr6D	95.31	64	3	0	1	64	429156411	429156348	6e-20	102
TP20338	6U	80.41	chr6D	98.44	64	1	0	1	64	436130547	436130484	3e-23	113
TP36582	6U	80.41	chr6D	98.44	64	1	0	1	64	436223995	436224058	3e-23	113
TP740	6U	80.77	chr6B	97.14	35	1	0	1	35	658799396	658799362	4e-07	60.2
TP9382	6U	80.77	chr6A	100	64	0	0	1	64	583270797	583270860	6e-25	119
TP20590	6U	82.81	chr6B	97.37	38	1	0	5	42	661042244	661042281	8e-09	65.8
TP43898	6U	82.81	chr6D	96.72	61	1	1	1	60	436925326	436925266	2e-19	100
TP5291	6U	82.81	chr6D	96.77	62	2	0	1	62	51141536	51141475	2e-20	104
TP20325	6U	83	chr6B	100	64	0	0	1	64	662270219	662270282	6e-25	119
TP2324	6U	84.51	chr6A	96.88	64	2	0	1	64	586994427	586994364	1e-21	108
TP27928	6U	84.51	chr6A	100	46	0	0	1	46	585973762	585973807	6e-15	86.1
TP44799	6U	84.51	chr6A	100	43	0	0	1	43	585821364	585821322	3e-13	80.5
TP5786	6U	84.51	chr6A	100	60	0	0	1	60	585822832	585822773	1e-22	111
TP24535	6U	84.87	chr6A	100	64	0	0	1	64	587968252	587968315	6e-25	119
TP34962	6U	84.87	chr6A	100	45	0	0	1	45	588455835	588455879	2e-14	84.2
TP29385	6U	84.89	chr6B	100	64	0	0	1	64	667884288	667884351	6e-25	119
TP39861	6U	84.89	chr6A	100	48	0	0	1	48	591219587	591219540	5e-16	89.8
TP17417	6U	86.74	chr6D	100	64	0	0	1	64	443956245	443956182	6e-25	119
TP24864	6U	86.74	chr6A	100	35	0	0	30	64	591820644	591820678	8e-09	65.8
TP28655	6U	86.74	chr6A	100	44	0	0	1	44	591418258	591418215	8e-14	82.4
TP3159	6U	87.1	chr6B	98.44	64	1	0	1	64	668438277	668438214	3e-23	113
TP43679	6U	88.25	chr6D	95	60	3	0	3	62	446486478	446486419	1e-17	95.3
TP20178	6U	88.45	chr6A	98.44	64	1	0	1	64	592339536	592339473	3e-23	113
TP19010	6U	88.79	chr6A	100	37	0	0	1	37	591951050	591951014	7e-10	69.4
TP3864	6U	88.79	chr6B	96.15	52	2	0	1	52	668987859	668987910	6e-15	86.1
TP45489	6U	88.97	chr6D	100	48	0	0	1	48	445817439	445817486	5e-16	89.8
TP9568	6U	88.97	chr6A	98.44	64	1	0	1	64	593437469	593437406	3e-23	113
TP19196	6U	89.12	chr6B	95.31	64	3	0	1	64	669907497	669907434	6e-20	102
TP14707	6U	89.33	chr6A	100	61	0	0	1	61	593284683	593284623	3e-23	113
TP517	6U	89.33	chr6A	100	64	0	0	1	64	593009345	593009408	6e-25	119
TP3830	6U	90.48	chr6D	96.88	64	2	0	1	64	447005778	447005841	1e-21	108
TP16967	6U	92.35	chr6A	100	64	0	0	1	64	595579000	595579063	6e-25	119
TP10774	6U	92.71	chr6B	98.44	64	1	0	1	64	681017739	681017802	3e-23	113
TP973	6U	92.71	chr6D	98.44	64	1	0	1	64	447897351	447897288	3e-23	113
TP26050	6U	93.49	chr6A	97.5	40	1	0	21	60	595669294	595669255	7e-10	69.4
TP26982	6U	93.82	chr6D	100	64	0	0	1	64	450169170	450169107	6e-25	119
TP15690	6U	94.83	chr6D	95.16	62	3	0	1	62	451070199	451070260	8e-19	99
TP27499	6U	94.83	chr6B	100	63	0	0	2	64	682317411	682317349	2e-24	117
TP31213	6U	94.83	chr6A	100	41	0	0	1	41	596895427	596895387	4e-12	76.8
TP41934	6U	94.83	chr6D	96.77	62	1	1	1	61	450364585	450364646	6e-20	102
TP42219	6U	94.83	chr6D	98.41	63	1	0	1	63	451657592	451657654	1e-22	111
TP7871	6U	94.83	chr6A	95.65	46	2	0	14	59	596735583	596735538	1e-11	75
TP28453	6U	96.32	chr6A	100	64	0	0	1	64	596774529	596774592	6e-25	119
TP36028	6U	96.7	chr6D	100	39	0	0	1	39	452498154	452498116	5e-11	73.1
TP1589	6U	97.78	chr6B	96.88	64	2	0	1	64	688749414	688749477	1e-21	108
TP12200	6U	99.34	chr6A	98.44	64	1	0	1	64	599632576	599632639	3e-23	113
TP35354	6U	99.34	chr6B	98.44	64	1	0	1	64	688759228	688759165	3e-23	113
TP39932	6U	99.34	chr6D	98.44	64	1	0	1	64	454128182	454128245	3e-23	113
TP25009	6U	100.37	chr6B	96.88	64	2	0	1	64	692036827	692036890	1e-21	108
TP20163	6U	101.08	chr6A	100	64	0	0	1	64	600816602	600816665	6e-25	119
TP7975	6U	101.08	chr6D	100	64	0	0	1	64	456333286	456333349	6e-25	119
TP10496	6U	101.09	chr6D	98.44	64	1	0	1	64	455312943	455312880	3e-23	113
TP2482	6U	101.81	chr6B	100	64	0	0	1	64	692774056	692774119	6e-25	119
TP25021	6U	101.81	chr6B	90.48	63	1	4	2	64	693828506	693828449	1e-12	78.7
TP6548	6U	101.81	chr6B	95.31	64	0	1	1	64	694100667	694100727	8e-19	99
TP8064	6U	101.81	chr6D	100	64	0	0	1	64	455504764	455504701	6e-25	119
TP14203	6U	102.15	chr6A	96.88	64	2	0	1	64	602444175	602444112	1e-21	108
TP1451	6U	102.82	chr6A	100	64	0	0	1	64	603207183	603207246	6e-25	119
TP25605	6U	102.82	chr6D	90.62	64	3	1	1	64	456108615	456108555	8e-14	82.4
TP15481	6U	104.57	chr6D	100	64	0	0	1	64	457584940	457585003	6e-25	119
TP13309	6U	104.83	chr6B	93.1	58	2	2	5	62	694908872	694908927	2e-14	84.2
TP27697	6U	104.83	chr6D	100	42	0	0	1	42	460312382	460312341	1e-12	78.7
TP3303	6U	104.83	chr6D	100	31	0	0	33	63	456763864	456763894	1e-06	58.4
TP28504	6U	106.51	chr6B	92.86	56	4	0	9	64	696360814	696360759	8e-14	82.4
TP2233	6U	108.46	chr6D	100	57	0	0	5	61	459546866	459546810	5e-21	106
TP40233	6U	108.46	chr6D	100	64	0	0	1	64	458971904	458971967	6e-25	119
TP24778	6U	109.18	chr6A	98.44	64	1	0	1	64	604295767	604295704	3e-23	113
TP27839	6U	109.18	chr6D	100	63	0	0	2	64	459253151	459253213	2e-24	117
TP33540	6U	110.26	chr6B	98.44	64	1	0	1	64	696920973	696920910	3e-23	113
TP34628	6U	110.62	chr6D	93.75	64	4	0	1	64	459618985	459618922	3e-18	97.1
TP41435	6U	110.88	chr6A	100	50	0	0	1	50	606774908	606774859	4e-17	93.5
TP26537	6U	111.7	chr6A	100	64	0	0	1	64	607426914	607426977	6e-25	119
TP13183	6U	114.04	chr6D	93.75	64	4	0	1	64	460733237	460733174	3e-18	97.1
TP1374	6U	114.73	chr6D	98.44	64	1	0	1	64	462221377	462221440	3e-23	113
TP19979	6U	114.73	chr6D	98.11	53	1	0	1	53	462634666	462634718	4e-17	93.5
TP24607	6U	114.73	chr6A	100	64	0	0	1	64	609036591	609036528	6e-25	119
TP34719	6U	114.73	chr6A	98.44	64	1	0	1	64	609382745	609382682	3e-23	113
TP35460	6U	114.73	chr6A	100	55	0	0	1	55	608113326	608113272	6e-20	102
TP40411	6U	114.73	chr6D	100	64	0	0	1	64	462615471	462615534	6e-25	119
TP41097	6U	114.73	chr6A	100	64	0	0	1	64	609023227	609023290	6e-25	119
TP13885	6U	115.11	chr6A	98.44	64	1	0	1	64	608502241	608502304	3e-23	113
TP14578	6U	115.11	chr6A	100	64	0	0	1	64	608153131	608153068	6e-25	119
TP42345	6U	115.11	chr6D	100	64	0	0	1	64	463808764	463808827	6e-25	119
TP36713	6U	115.45	chr6A	100	40	0	0	1	40	607951880	607951841	1e-11	75
TP23919	6U	116.12	chr6A	96.88	64	2	0	1	64	609285651	609285714	1e-21	108
TP30683	6U	116.12	chr6D	95.31	64	3	0	1	64	461684821	461684758	6e-20	102
TP41157	6U	116.12	chr6B	96.88	64	2	0	1	64	704673347	704673410	1e-21	108
TP41790	6U	116.12	chr6A	100	64	0	0	1	64	609883134	609883197	6e-25	119
TP799	6U	116.12	chr6D	100	64	0	0	1	64	463762345	463762282	6e-25	119
TP15934	6U	116.61	chr6A	98.18	55	1	0	1	55	609718382	609718328	3e-18	97.1
TP38761	6U	116.61	chr6A	100	64	0	0	1	64	609883461	609883398	6e-25	119
TP95	6U	116.97	chr6D	100	53	0	0	1	53	463762066	463762014	8e-19	99
TP26928	6U	117.33	chr6A	98.44	64	1	0	1	64	611308436	611308373	3e-23	113
TP27090	6U	117.33	chr6A	100	64	0	0	1	64	611314702	611314765	6e-25	119
TP30349	6U	117.69	chr6D	100	64	0	0	1	64	463762653	463762716	6e-25	119
TP16327	6U	117.93	chr6D	98.44	64	1	0	1	64	463854524	463854461	3e-23	113
TP18138	6U	117.93	chr6D	98.44	64	1	0	1	64	464521040	464520977	3e-23	113
TP31353	6U	117.93	chr6B	98.44	64	1	0	1	64	708271391	708271328	3e-23	113
TP29030	6U	119.21	chr6D	100	64	0	0	1	64	468810629	468810566	6e-25	119
TP27098	6U	120.01	chr6B	98.44	64	1	0	1	64	712459131	712459194	3e-23	113
TP18343	6U	120.35	chr6A	100	64	0	0	1	64	613963038	613962975	6e-25	119
TP13013	6U	120.64	chr6A	100	64	0	0	1	64	612929339	612929276	6e-25	119
TP13237	6U	120.64	chr6A	98.44	64	1	0	1	64	612128968	612128905	3e-23	113
TP12748	6U	125.32	chr6A	100	64	0	0	1	64	73698932	73698995	6e-25	119
TP19785	6U	125.32	chr6D	100	59	0	0	2	60	470574048	470573990	4e-22	110
TP45937	6U	125.32	chr6D	93.75	64	4	0	1	64	470102478	470102541	3e-18	97.1
TP2884	6U	128.27	chr6A	100	64	0	0	1	64	616108912	616108849	6e-25	119
TP33972	6U	128.68	chr6A	100	64	0	0	1	64	615313001	615313064	6e-25	119
TP321	6U	129.35	chr6B	100	64	0	0	1	64	716992636	716992699	6e-25	119
TP38091	6U	131.77	chr6A	98.44	64	1	0	1	64	615887592	615887655	3e-23	113
TP43694	6U	131.77	chr6D	100	64	0	0	1	64	472724887	472724824	6e-25	119
TP13682	6U	132.59	chr6D	100	41	0	0	24	64	470894846	470894806	4e-12	76.8
TP2155	7U	1.94	chr7D	98.18	55	1	0	8	62	159611265	159611211	3e-18	97.1
TP44232	7U	1.94	chr7A	100	61	0	0	1	61	162466034	162466094	3e-23	113
TP20733	7U	8.93	chr7D	96.88	64	2	0	1	64	160505709	160505772	1e-21	108
TP20107	7U	12.29	chr7B	97.96	49	1	0	1	49	125160364	125160412	6e-15	86.1
TP32134	7U	12.29	chr7D	100	64	0	0	1	64	159689064	159689001	6e-25	119
TP35976	7U	12.29	chr7A	98.44	64	1	0	1	64	165749157	165749094	3e-23	113
TP40339	7U	12.29	chr7D	100	51	0	0	1	51	159023723	159023673	1e-17	95.3
TP1024	7U	15.68	chr7B	100	59	0	0	3	61	126532513	126532571	4e-22	110
TP35063	7U	15.73	chr7D	100	64	0	0	1	64	165889985	165890048	6e-25	119
TP3730	7U	16.06	chr7A	98.36	61	1	0	1	61	167751187	167751247	1e-21	108
TP35961	7U	16.6	chr7B	100	64	0	0	1	64	127620474	127620537	6e-25	119
TP39494	7U	18.27	chr7B	98.21	56	1	0	1	56	126970138	126970193	8e-19	99
TP5744	7U	20.86	chr7A	96.88	64	2	0	1	64	167816985	167816922	1e-21	108
TP12246	7U	27.45	chr7D	100	45	0	0	1	45	167536321	167536277	2e-14	84.2
TP16497	7U	27.45	chr7D	100	62	0	0	1	62	168379086	168379025	8e-24	115
TP4425	7U	28.16	chr7A	100	64	0	0	1	64	168743039	168742976	6e-25	119
TP24211	7U	28.88	chr7D	97.87	47	1	0	1	47	167535759	167535713	8e-14	82.4
TP22660	7U	30.47	chr7D	100	64	0	0	1	64	171263542	171263605	6e-25	119
TP10121	7U	31.48	chr7A	98.44	64	1	0	1	64	176214492	176214555	3e-23	113
TP10476	7U	31.48	chr7B	100	64	0	0	1	64	141554213	141554150	6e-25	119
TP1502	7U	31.48	chr7A	100	64	0	0	1	64	180580170	180580107	6e-25	119
TP2454	7U	31.48	chr7B	98.15	54	1	0	1	54	141776257	141776310	1e-17	95.3
TP2928	7U	31.48	chr7A	98.44	64	1	0	1	64	180019058	180018995	3e-23	113
TP33504	7U	31.48	chr7A	100	64	0	0	1	64	174624700	174624763	6e-25	119
TP41746	7U	31.48	chr7D	100	57	0	0	1	57	174630744	174630688	5e-21	106
TP31965	7U	31.81	chr7D	98.44	64	1	0	1	64	176394738	176394675	3e-23	113
TP8864	7U	32.7	chr7A	96.88	64	2	0	1	64	184255857	184255920	1e-21	108
TP12003	7U	33.15	chr7D	100	43	0	0	16	58	397945816	397945858	3e-13	80.5
TP18636	7U	33.15	chr7A	98.44	64	1	0	1	64	184104063	184104000	3e-23	113
TP30834	7U	33.15	chr7B	100	64	0	0	1	64	269822741	269822678	6e-25	119
TP36707	7U	33.15	chr7D	100	64	0	0	1	64	412565763	412565826	6e-25	119
TP40107	7U	33.15	chr7D	100	64	0	0	1	64	219235385	219235322	6e-25	119
TP44880	7U	33.15	chr7D	96.88	64	0	1	1	64	191107373	191107434	5e-21	106
TP12530	7U	33.2	chr7A	92.54	67	2	3	1	64	453967267	453967333	4e-17	93.5
TP27626	7U	33.2	chr7D	100	64	0	0	1	64	199863630	199863693	6e-25	119
TP4047	7U	33.2	chr7A	95.31	64	3	0	1	64	207831215	207831152	6e-20	102
TP43810	7U	33.2	chr7D	98.18	55	1	0	1	55	192091967	192092021	3e-18	97.1
TP43829	7U	33.2	chr7D	98.31	59	1	0	6	64	474675320	474675378	2e-20	104
TP13091	7U	33.23	chr7B	97.92	48	1	0	1	48	163478617	163478664	2e-14	84.2
TP19867	7U	33.23	chr7A	100	43	0	0	1	43	258753681	258753639	3e-13	80.5
TP24314	7U	33.23	chr7A	97.3	37	1	0	28	64	538782646	538782682	3e-08	63.9
TP3461	7U	33.95	chr7B	96.88	64	2	0	1	64	211937915	211937978	1e-21	108
TP9935	7U	33.95	chr7A	100	64	0	0	1	64	436622193	436622256	6e-25	119
TP1152	7U	34.28	chr7D	92.06	63	5	0	2	64	461098409	461098347	5e-16	89.8
TP13966	7U	34.28	chr7B	95.31	64	3	0	1	64	495694790	495694727	6e-20	102
TP15517	7U	34.28	chr7D	97.87	47	1	0	1	47	379248499	379248453	8e-14	82.4
TP16178	7U	34.28	chr7D	98.44	64	1	0	1	64	365776589	365776652	3e-23	113
TP16209	7U	34.28	chr7B	100	46	0	0	1	46	372010147	372010192	6e-15	86.1
TP17850	7U	34.28	chr7D	100	62	0	0	1	62	406272180	406272119	8e-24	115
TP18063	7U	34.28	chr7B	93.75	64	2	1	1	64	504791580	504791641	1e-17	95.3
TP18235	7U	34.28	chr7D	95.24	63	3	0	1	63	500096429	500096491	2e-19	100
TP18528	7U	34.28	chr7D	100	64	0	0	1	64	450985203	450985140	6e-25	119
TP19162	7U	34.28	chr7A	100	64	0	0	1	64	450893935	450893998	6e-25	119
TP19697	7U	34.28	chr7B	100	47	0	0	1	47	498059635	498059681	2e-15	87.9
TP19748	7U	34.28	chr7A	100	47	0	0	1	47	449252882	449252836	2e-15	87.9
TP20061	7U	34.28	chr7A	100	45	0	0	1	45	275159015	275159059	2e-14	84.2
TP20275	7U	34.28	chr7D	100	39	0	0	1	39	477616413	477616451	5e-11	73.1
TP216	7U	34.28	chr7D	98.21	56	1	0	1	56	484320649	484320594	8e-19	99
TP21804	7U	34.28	chr7D	95.24	63	3	0	2	64	245336799	245336861	2e-19	100
TP23071	7U	34.28	chr7D	96	50	2	0	4	53	476654525	476654476	8e-14	82.4
TP238	7U	34.28	chr7D	96.88	64	2	0	1	64	254814665	254814728	1e-21	108
TP2472	7U	34.28	chr7D	100	35	0	0	30	64	495815471	495815505	8e-09	65.8
TP26057	7U	34.28	chr7D	100	64	0	0	1	64	232997845	232997782	6e-25	119
TP26879	7U	34.28	chr7A	100	55	0	0	1	55	381179392	381179338	6e-20	102
TP27228	7U	34.28	chr7A	100	39	0	0	1	39	341372110	341372148	5e-11	73.1
TP28742	7U	34.28	chr7D	91.04	67	3	1	1	64	246763696	246763762	2e-15	87.9
TP28930	7U	34.28	chr7B	96.88	64	2	0	1	64	513744967	513745030	1e-21	108
TP29419	7U	34.28	chr7A	95.38	65	2	1	1	64	195761039	195760975	6e-20	102
TP3030	7U	34.28	chr7D	98.44	64	1	0	1	64	430090877	430090940	3e-23	113
TP30325	7U	34.28	chr7B	100	64	0	0	1	64	184272589	184272652	6e-25	119
TP31093	7U	34.28	chr7A	100	53	0	0	1	53	199960716	199960664	8e-19	99
TP31182	7U	34.28	chr7D	96.88	64	2	0	1	64	412835179	412835242	1e-21	108
TP31907	7U	34.28	chr7B	100	64	0	0	1	64	200870453	200870516	6e-25	119
TP32415	7U	34.28	chr7B	100	37	0	0	1	37	216913661	216913697	7e-10	69.4
TP32450	7U	34.28	chr7D	98.44	64	1	0	1	64	380102408	380102345	3e-23	113
TP32539	7U	34.28	chr7D	89.06	64	7	0	1	64	479033342	479033279	3e-13	80.5
TP32587	7U	34.28	chr7A	100	64	0	0	1	64	459563955	459564018	6e-25	119
TP32753	7U	34.28	chr7D	100	64	0	0	1	64	461731730	461731793	6e-25	119
TP32998	7U	34.28	chr7B	98.44	64	1	0	1	64	439274287	439274350	3e-23	113
TP33760	7U	34.28	chr7B	100	64	0	0	1	64	145906155	145906218	6e-25	119
TP3377	7U	34.28	chr7A	98.44	64	1	0	1	64	474224285	474224348	3e-23	113
TP33950	7U	34.28	chr7D	100	57	0	0	8	64	461197026	461196970	5e-21	106
TP34096	7U	34.28	chr7D	98.44	64	1	0	1	64	224406086	224406149	3e-23	113
TP36374	7U	34.28	chr7D	93.75	64	4	0	1	64	476656829	476656892	3e-18	97.1
TP36792	7U	34.28	chr7A	100	60	0	0	1	60	566459308	566459367	1e-22	111
TP37020	7U	34.28	chr7B	90.77	65	2	1	4	64	483739342	483739278	2e-14	84.2
TP39722	7U	34.28	chr7B	100	64	0	0	1	64	228247628	228247691	6e-25	119
TP40877	7U	34.28	chr7B	96.88	64	2	0	1	64	174549087	174549150	1e-21	108
TP41112	7U	34.28	chr7D	98.44	64	1	0	1	64	237557234	237557171	3e-23	113
TP41343	7U	34.28	chr7B	100	64	0	0	1	64	216687553	216687616	6e-25	119
TP41743	7U	34.28	chr7A	96.55	58	2	0	7	64	198408091	198408034	3e-18	97.1
TP43705	7U	34.28	chr7B	98.44	64	1	0	1	64	189869737	189869674	3e-23	113
TP44061	7U	34.28	chr7B	98.25	57	0	1	6	62	480838351	480838406	8e-19	99
TP44623	7U	34.28	chr7D	93.75	64	4	0	1	64	496992824	496992761	3e-18	97.1
TP45056	7U	34.28	chr7D	100	64	0	0	1	64	192093912	192093849	6e-25	119
TP45737	7U	34.28	chr7A	100	64	0	0	1	64	518432674	518432611	6e-25	119
TP45844	7U	34.28	chr7B	98.21	56	0	1	1	56	501560040	501559986	3e-18	97.1
TP514	7U	34.28	chr7A	96.88	64	2	0	1	64	436716110	436716047	1e-21	108
TP5276	7U	34.28	chr7D	98.44	64	1	0	1	64	484415456	484415519	3e-23	113
TP6388	7U	34.28	chr7D	100	63	0	0	2	64	187206481	187206419	2e-24	117
TP826	7U	34.28	chr7D	95.31	64	3	0	1	64	508852528	508852591	6e-20	102
TP8322	7U	34.28	chr7A	100	64	0	0	1	64	589383130	589383067	6e-25	119
TP8711	7U	34.28	chr7B	100	53	0	0	1	53	513215907	513215855	8e-19	99
TP913	7U	34.28	chr7D	93.75	64	3	1	1	64	461087100	461087038	1e-17	95.3
TP9580	7U	34.28	chr7A	95.31	64	3	0	1	64	200832804	200832867	6e-20	102
TP9734	7U	34.28	chr7B	96.83	63	2	0	1	63	220099405	220099343	5e-21	106
TP9827	7U	34.28	chr7B	96.88	64	2	0	1	64	504413652	504413589	1e-21	108
TP9938	7U	34.28	chr7A	100	64	0	0	1	64	431922053	431922116	6e-25	119
TP1334	7U	34.95	chr7A	96.88	64	1	1	1	64	443889067	443889129	5e-21	106
TP15067	7U	34.95	chr7B	98.44	64	1	0	1	64	381811632	381811695	3e-23	113
TP17957	7U	34.95	chr7D	93.55	62	4	0	3	64	195887266	195887205	4e-17	93.5
TP21786	7U	34.95	chr7D	96.88	64	2	0	1	64	312495832	312495769	1e-21	108
TP24426	7U	34.95	chr7D	100	32	0	0	7	38	312495839	312495870	4e-07	60.2
TP26318	7U	34.95	chr7D	100	64	0	0	1	64	303268431	303268368	6e-25	119
TP28209	7U	34.95	chr7D	95.74	47	1	1	1	46	179431559	179431513	1e-11	75
TP28972	7U	34.95	chr7B	98.44	64	1	0	1	64	146032242	146032305	3e-23	113
TP37946	7U	34.95	chr7D	100	51	0	0	1	51	207166010	207165960	1e-17	95.3
TP38603	7U	34.95	chr7D	98.44	64	1	0	1	64	393060449	393060512	3e-23	113
TP39914	7U	34.95	chr7D	100	64	0	0	1	64	256758483	256758420	6e-25	119
TP45563	7U	34.95	chr7D	92.54	67	2	3	1	64	179467800	179467734	4e-17	93.5
TP8954	7U	34.95	chr7B	100	64	0	0	1	64	155881690	155881627	6e-25	119
TP12168	7U	35.68	chr7A	100	40	0	0	1	40	591576121	591576082	1e-11	75
TP16068	7U	35.68	chr7D	98.44	64	1	0	1	64	521693926	521693863	3e-23	113
TP18734	7U	35.68	chr7B	100	64	0	0	1	64	561253465	561253402	6e-25	119
TP20120	7U	35.68	chr7D	100	64	0	0	1	64	525731017	525731080	6e-25	119
TP220	7U	35.68	chr7A	93.44	61	4	0	4	64	587291623	587291563	1e-16	91.6
TP22015	7U	35.68	chr7B	100	52	0	0	1	52	559110172	559110223	3e-18	97.1
TP22643	7U	35.68	chr7A	96.88	64	2	0	1	64	581356115	581356178	1e-21	108
TP29677	7U	35.68	chr7A	87.1	62	8	0	1	62	579659883	579659944	2e-10	71.3
TP32319	7U	35.68	chr7D	96.3	54	1	1	1	54	528107910	528107858	2e-15	87.9
TP40596	7U	35.68	chr7B	100	64	0	0	1	64	559519728	559519791	6e-25	119
TP44694	7U	35.68	chr7D	97.37	38	1	0	1	38	510410545	510410582	8e-09	65.8
TP9884	7U	35.68	chr7D	98.44	64	1	0	1	64	526334621	526334684	3e-23	113
TP14971	7U	36.37	chr7D	95.08	61	3	0	1	61	524511132	524511192	3e-18	97.1
TP23660	7U	36.37	chr7D	98.44	64	1	0	1	64	529429661	529429724	3e-23	113
TP37292	7U	36.37	chr7A	93.75	64	4	0	1	64	602733081	602733144	3e-18	97.1
TP12451	7U	37.37	chr7A	95.31	64	3	0	1	64	581271972	581271909	6e-20	102
TP36192	7U	38.27	chr7A	100	64	0	0	1	64	610609360	610609297	6e-25	119
TP37964	7U	38.27	chr7D	100	64	0	0	1	64	531555630	531555693	6e-25	119
TP38534	7U	38.27	chr7A	97.56	41	1	0	7	47	618044376	618044336	2e-10	71.3
TP39191	7U	38.27	chr7A	96.88	64	2	0	1	64	611165750	611165687	1e-21	108
TP43544	7U	38.27	chr7D	96.72	61	1	1	3	62	530089388	530089328	2e-19	100
TP8795	7U	38.27	chr7D	100	64	0	0	1	64	531547052	531546989	6e-25	119
TP40096	7U	38.78	chr7D	95.31	64	3	0	1	64	530089849	530089912	6e-20	102
TP6640	7U	38.78	chr7A	100	64	0	0	1	64	609315075	609315138	6e-25	119
TP8946	7U	38.78	chr7A	100	64	0	0	1	64	618169285	618169222	6e-25	119
TP37802	7U	39.06	chr7A	98.44	64	1	0	1	64	610919274	610919337	3e-23	113
TP11864	7U	40.86	chr7D	98.31	59	1	0	1	59	535863137	535863079	2e-20	104
TP1572	7U	40.86	chr7B	98.44	64	1	0	1	64	395872335	395872272	3e-23	113
TP45440	7U	40.86	chr7B	100	64	0	0	1	64	580136860	580136797	6e-25	119
TP7600	7U	40.86	chr7B	95.31	64	3	0	1	64	583525123	583525186	6e-20	102
TP22268	7U	41.54	chr7D	100	64	0	0	1	64	540323605	540323668	6e-25	119
TP27095	7U	41.54	chr7D	98.44	64	1	0	1	64	540463539	540463476	3e-23	113
TP27965	7U	41.54	chr7A	100	40	0	0	1	40	622291262	622291301	1e-11	75
TP35977	7U	41.54	chr7B	100	64	0	0	1	64	584009037	584009100	6e-25	119
TP38457	7U	41.54	chr7A	100	64	0	0	1	64	621783566	621783629	6e-25	119
TP28605	7U	41.58	chr7B	96.15	52	2	0	1	52	581225177	581225228	6e-15	86.1
TP44711	7U	41.58	chr7D	98.25	57	1	0	1	57	538106901	538106845	2e-19	100
TP16559	7U	41.94	chr7B	100	56	0	0	1	56	589121694	589121639	2e-20	104
TP2822	7U	42.3	chr7D	100	60	0	0	1	60	545259955	545260014	1e-22	111
TP46152	7U	42.3	chr7A	92.98	57	4	0	3	59	619096389	619096333	2e-14	84.2
TP32341	7U	43.81	chr7D	95	60	3	0	5	64	553428297	553428356	1e-17	95.3
TP32575	7U	44.09	chr7D	100	64	0	0	1	64	74020920	74020983	6e-25	119
TP19498	7U	44.17	chr7D	95.31	64	3	0	1	64	552459218	552459281	6e-20	102
TP22405	7U	44.17	chr7D	97.3	37	1	0	1	37	553336334	553336298	3e-08	63.9
TP25732	7U	44.17	chr7D	100	53	0	0	1	53	550055554	550055606	8e-19	99
TP3454	7U	44.43	chr7B	96.88	64	2	0	1	64	590082287	590082224	1e-21	108
TP22709	7U	45.1	chr7D	100	64	0	0	1	64	553454657	553454720	6e-25	119
TP8971	7U	45.1	chr7D	89.06	64	1	2	1	64	553454520	553454577	1e-11	75
TP16007	7U	45.43	chr7D	96.88	64	2	0	1	64	553454523	553454460	1e-21	108
TP11969	7U	46.04	chr7A	94.64	56	3	0	9	64	641375023	641374968	2e-15	87.9
TP12677	7U	46.04	chr7B	100	49	0	0	1	49	605063434	605063482	1e-16	91.6
TP6949	7U	46.17	chr7A	96.88	64	2	0	1	64	558683731	558683794	1e-21	108
TP34328	7U	49.09	chr7D	100	64	0	0	1	64	559408200	559408263	6e-25	119
TP32027	7U	50.96	chr7D	98.44	64	1	0	1	64	562774647	562774584	3e-23	113
TP13883	7U	51.68	chr7A	95.31	64	2	1	1	64	651631459	651631521	2e-19	100
TP17254	7U	53.55	chr7B	100	64	0	0	1	64	632140157	632140220	6e-25	119
TP19675	7U	53.55	chr7D	97.92	48	1	0	17	64	125793345	125793298	2e-14	84.2
TP2641	7U	53.55	chr7A	98.31	59	1	0	6	64	664703408	664703466	2e-20	104
TP31552	7U	53.55	chr7B	93.1	58	0	2	2	55	631243767	631243824	8e-14	82.4
TP6863	7U	53.55	chr7B	98.44	64	1	0	1	64	628415683	628415746	3e-23	113
TP9311	7U	53.55	chr7D	100	64	0	0	1	64	572621551	572621488	6e-25	119
TP38527	7U	58.39	chr7D	100	59	0	0	1	59	571663234	571663292	4e-22	110
TP10447	7U	61.28	chr7D	98.44	64	1	0	1	64	572806522	572806459	3e-23	113
TP13877	7U	61.28	chr7D	98.44	64	1	0	1	64	572134386	572134323	3e-23	113
TP32092	7U	61.28	chr7A	88.89	72	0	6	1	64	661210546	661210617	8e-14	82.4
TP7223	7U	61.28	chr7D	98.28	58	1	0	7	64	573148561	573148504	6e-20	102
TP33638	7U	64.1	chr7B	100	56	0	0	1	56	637854313	637854258	2e-20	104
TP37366	7U	64.84	chr7D	95.31	64	3	0	1	64	576012970	576013033	6e-20	102
TP14205	7U	64.96	chr7A	97.83	46	1	0	1	46	666445601	666445556	3e-13	80.5
TP27755	7U	64.96	chr7A	98.44	64	1	0	1	64	667279051	667278988	3e-23	113
TP20950	7U	65.32	chr7B	98.15	54	1	0	1	54	639811717	639811770	1e-17	95.3
TP38154	7U	65.32	chr7B	98.39	62	1	0	3	64	639458484	639458423	4e-22	110
TP29683	7U	68.06	chr7B	96.88	64	2	0	1	64	640827879	640827816	1e-21	108
TP28836	7U	68.87	chr7A	96.88	64	2	0	1	64	669770622	669770685	1e-21	108
TP12278	7U	69.85	chr7D	100	64	0	0	1	64	578021728	578021665	6e-25	119
TP26881	7U	69.85	chr7D	94.92	59	2	1	7	64	577935822	577935880	1e-16	91.6
TP37127	7U	69.85	chr7D	98.11	53	1	0	1	53	578441076	578441128	4e-17	93.5
TP43338	7U	69.85	chr7D	100	31	0	0	1	31	578422789	578422819	1e-06	58.4
TP16395	7U	70.21	chr7A	100	64	0	0	1	64	670196283	670196346	6e-25	119
TP32115	7U	70.88	chr7A	98.44	64	1	0	1	64	670496893	670496956	3e-23	113
TP6442	7U	70.88	chr7B	96.88	64	2	0	1	64	289879210	289879147	1e-21	108
TP14068	7U	70.93	chr7D	98.44	64	1	0	1	64	577547847	577547910	3e-23	113
TP29572	7U	71.28	chr7D	98.04	51	1	0	1	51	579866331	579866281	5e-16	89.8
TP37657	7U	71.28	chr7A	96	50	2	0	2	51	59369699	59369650	8e-14	82.4
TP4202	7U	71.28	chr7B	96.88	64	2	0	1	64	643299018	643298955	1e-21	108
TP6068	7U	71.28	chr7D	100	59	0	0	4	62	579046097	579046039	4e-22	110
TP6382	7U	71.28	chr7B	100	64	0	0	1	64	643531389	643531326	6e-25	119
TP21095	7U	71.62	chr7B	95.31	64	3	0	1	64	642700001	642700064	6e-20	102
TP31079	7U	71.62	chr7D	100	52	0	0	1	52	579047441	579047390	3e-18	97.1
TP33013	7U	71.62	chr7B	98.44	64	1	0	1	64	645347845	645347782	3e-23	113
TP4724	7U	71.62	chr7A	100	35	0	0	1	35	671766170	671766204	8e-09	65.8
TP1530	7U	73.77	chr7B	90.62	64	0	1	1	64	472302496	472302553	3e-13	80.5
TP39034	7U	74.44	chr7A	95.31	64	3	0	1	64	673943218	673943281	6e-20	102
[truncated: 196 more rows]
